# Supplementary material for: Study of the Metabolite Changes in Ganoderma lucidum under Pineapple Leaf Residue Stress via LC-MS/MS Coupled with a Non-Targeted Metabolomics Approach
Source: MDPI journal article supplement (doi:10.3390/metabo13040487), 2023-03-28
Supplement: s1 [file s1]

# Study of the metabolite changes in *Ganoderma lucidum* under pineapple leaf residue stress via LC-MS/MS coupled with a non-targeted metabolomics approach

Yijun Liu<sup>1,2,3†</sup>, Yangyang Qian<sup>1,4†</sup>, Chunyu Wang<sup>1</sup>, Yingying He<sup>1</sup>, Chuxing Zhu<sup>1</sup>, Gang Chen<sup>1, \*</sup>, Lijing Lin<sup>2,3</sup> and Yuliang Chen<sup>2,3</sup>

<sup>1</sup> State Key Laboratory of Pulp and Paper Engineering, College of Light Industry and Engineering, South China University of Technology, Guangzhou 510640, China;

<sup>2</sup> Hainan Key Laboratory of Storage & Processing of Fruits and Vegetables, Agricultural Products Processing Research Institute, Chinese Academy of Tropical Agricultural Sciences, Zhanjiang 524001, China;

<sup>3</sup> Key Laboratory of Tropical Crop Products Processing of Ministry of Agriculture and Rural Affairs, Agricultural Products Processing Research Institute, Chinese Academy of Tropical Agricultural Sciences, Zhanjiang 524001, China;

<sup>4</sup> College of Tea (Pu'er), West Yunnan University of Applied Sciences, Pu'er 665000, China.

† These authors contributed equally to this work.

\* Correspondence: papercg@scut.edu.cn.

Table S1. Identification information of metabolite in *G.lucidum* under pineapple leaf residue stress

|    | Average Rt(min) | Average Mz | Metabolite name                                                                                          | Adduct type          | Reference m/z | Formula      | Ontology                             | INCHIKEY                     | SMILES                                         |
|----|-----------------|------------|----------------------------------------------------------------------------------------------------------|----------------------|---------------|--------------|--------------------------------------|------------------------------|------------------------------------------------|
| 1  | 0.161           | 259.96069  | N-acetyl-O-methyltyrosine                                                                                | [M+H] <sup>+</sup>   | 259.96497     | C12H15N04    | Phenylalanine and derivatives        | HRUASHPCEMXOMR-UHFFFAOYSA-N  | O=C(O)C(N=C(O)C)CC1=CC=C(OC)C=C1               |
| 2  | 0.168           | 204.9659   | PYROGALLIN                                                                                               | [M+H] <sup>+</sup>   | 204.96191     | C11H8O4      | Tropolones                           | OLSYHLURTGEIBH-UHFFFAOYSA-N  | O=C1C(O)=CC=CC=CC(=O)C=C1O                     |
| 3  | 0.172           | 283.26163  | (9Z)-9-octadecenoic acid                                                                                 | [M+H] <sup>+</sup>   | 283.26001     | C18H34O2     | Long-chain fatty acids               | ZAPPMIVWEC5IRJ-KTKRT1GZSA-N  | O=C(O)CCCCCCCC=CCCCCCCC                        |
| 4  | 0.194           | 111.03909  | Butyric acid                                                                                             | [M+H] <sup>+</sup>   | 111.04        | C4H8O2       | Straight chain fatty acids           | FERIUCNNQQJTQY-UHFFFAOYSA-N  | O=C(O)CCC                                      |
| 5  | 0.322           | 118.08617  | Betaine                                                                                                  | [M+H] <sup>+</sup>   | 118.08626     | C5H11NO2     | Alpha amino acids                    | KWUHFFTVRNATP-UHFFFAOYSA-N   | C[N+](C)(C)CC(=O)[O-]                          |
| 6  | 0.333           | 191.96115  | Clopyralid                                                                                               | [M+H] <sup>+</sup>   | 191.96136     | C6H3Cl2NO2   | Pyridinecarboxylic acids             | HUBANNPOLNYSAD-UHFFFAOYSA-N  | C1=CC(Cl)=NC(=C1Cl)C(=O)O                      |
| 7  | 0.34            | 271.26318  | Heptadecanoic acid                                                                                       | [M+H] <sup>+</sup>   | 271.26315     | C17H34O2     | Long-chain fatty acids               | KEMQGTRYUADPNZ-UHFFFAOYSA-N  | O=C(O)CCCCCCCCCCCCCCC                          |
| 8  | 0.352           | 186.01845  | O-PHOSPHO-L-SERINE                                                                                       | [M+H] <sup>+</sup>   | 186.02        | C3H8NO6P     | Alpha amino acids                    | BZQFWGGLXLEPQ-UHFFFAOYSA-N   | O=C(O)C(N)COP(=O)(O)O                          |
| 9  | 0.367           | 171.03514  | 2-(2,4-dioxo-3,4-dihydropyrimidin-1(2H)-yl)acetic acid                                                   | [M+H] <sup>+</sup>   | 171.03999     | C6H6N2O4     | Alpha amino acids and derivatives    | ZFNQFXDDQAEAFI-UHFFFAOYSA-N  | O=C1C=CN(C(=O)N1)CC(=O)O                       |
| 10 | 0.4             | 176.01422  | 1-Methylsulfinybutenyl isothiocyanate                                                                    | [M+H] <sup>+</sup>   | 176.01984     | C6H9NOS2     | Glucosinolate breakdown metabolites  | KQGJFQMGPDVOQE-UHFFFAOYNA-N  | CS(=O)C=CCN=C=S                                |
| 11 | 0.428           | 163.05971  | 3-Hydroxy-3-methylglutaric acid                                                                          | [M+H] <sup>+</sup>   | 163.0601      | C6H10O5      | Hydroxy fatty acids                  | NPOAOTPXWNWTSB-UHFFFAOYSA-N  | CC(O)(CC(O)=O)CC(O)=O                          |
| 12 | 0.438           | 199.17021  | 3,7-dimethyl-6-octenyl acetate                                                                           | [M+H] <sup>+</sup>   | 199.17        | C12H22O2     | Fatty alcohol esters                 | JOZKFWLHCDGJA-LLVKDONJSA-N   | O=C(OCCCC)CCC=C(C)C                            |
| 13 | 0.439           | 96.96992   | Phosphoric acid                                                                                          | [M-H] <sup>-</sup>   | 96.96962      | H3O4P        | Non-metal phosphates                 | NB1LXXVUZAPLBC-UHFFFAOYSA-N  | O=P(O)(O)O                                     |
| 14 | 0.442           | 285.27829  | stearic acid                                                                                             | [M+H] <sup>+</sup>   | 285.28        | C18H36O2     | Long-chain fatty acids               | Q1QXTHQIDYTFRIH-UHFFFAOYSA-N | O=C(O)CCCCCCCCCCCCCCC                          |
| 15 | 0.464           | 391.28308  | Di(2-ethylhexyl)phthalate (DEHP)                                                                         | [M+H] <sup>+</sup>   | 391.28427     | C24H38O4     | Benzoic acid esters                  | BJQHLKABXJIVAM-UHFFFAOYNA-N  | CCCCC(CC)COC(C1=CC=CC=C1C(=O)OCC(CC)CCCC)=O    |
| 16 | 0.482           | 109.02829  | p-Benzoquinone                                                                                           | [M+H] <sup>+</sup>   | 109.0284      | C6H4O2       | p-benzoquinones                      | AZQWKYJCGOJGHM-UHFFFAOYSA-N  | O=C1C=CC(=O)C=C1                               |
| 17 | 0.487           | 201.99016  | Cysteine-S-sulfate                                                                                       | [M+H] <sup>+</sup>   | 201.98384     | C3H7NO5S2    | S-sulfo-L-cysteines                  | NOKPBJYHPHWAN-REOHCLBISA-N   | C([C-H](C(=O)O)N)SS(=O)=O                      |
| 18 | 0.508           | 132.10263  | Isoleucine (not validated)                                                                               | [M+H] <sup>+</sup>   | 132.1028      | C6H13NO2     | Amino acids                          | AGPKZVBTJJNPAG-UHFFFAOYNA-N  | O=C(O)C(N)C(C)CC                               |
| 19 | 0.509           | 102.12761  | Hexylamine                                                                                               | [M+H] <sup>+</sup>   | 102.12772     | C6H15N       | Monoalkylamines                      | BMVXCPBGZKUPN-UHFFFAOYSA-N   | CCCCCCN                                        |
| 20 | 0.542           | 186.01791  | O-Phosphoserine                                                                                          | [M+H] <sup>+</sup>   | 186.0162      | C3H8NO6P     | L-alpha-amino acids                  | BZQFWGGLXLEPQ-UHFFFAOYNA-N   | O=C(O)C(N)COP(=O)(O)O                          |
| 21 | 0.553           | 232.16878  | Alpha-pyrrolidinovalerophenone                                                                           | [M+H] <sup>+</sup>   | 232.17        | C15H21NO     | Alkyl-phenylketones                  | YD1DRWHPFMLGR-UHFFFAOYSA-N   | O=C(C(=CC=CC=C1)C(N2CCCC2)CCC                  |
| 22 | 0.563           | 297.99988  | (E)-2-(hydroxymethyl)-3-(3-oxo-5-propan-2-yl-4,5,6,7-tetrahydro-1H-2-benzofuran-4-yl)propan-2-enoic acid | [M+H] <sup>+</sup>   | 298.00226     | C15H20O5     | Terpene lactones                     | YVASZTJGPFKRMW-BJMGVGYQSA-N  | O=C(O)C(=CC1=CC(=O)OCC2CCC1C(C)C)CO            |
| 23 | 0.597           | 155.14288  | Linalool                                                                                                 | [M+H] <sup>+</sup>   | 155.14304     | C10H18O      | Acyclic monoterpenoids               | CDOSHSSSFJOMGT-UHFFFAOYNA-N  | OC(C=C)C(C)CCC=C(C)C                           |
| 24 | 0.606           | 113.06019  | 1,2-Cyclohexanedione                                                                                     | [M+H] <sup>+</sup>   | 113.05971     | C6H8O2       | Cyclic ketones                       | O1LA1QEIWYQPH-UHFFFAOYSA-N   | O=C1C(=O)CCCC1                                 |
| 25 | 0.696           | 168.02489  | Quinolinic Acid                                                                                          | [M+H] <sup>+</sup>   | 168.02502     | C7H5NO4      | Pyridinecarboxylic acids             | GJAWHXHKYXBSV-UHFFFAOYSA-N   | O=C(O)C1=NC=CC=C1C(=O)O                        |
| 26 | 0.7             | 255.93947  | Triclopyr                                                                                                | [M+H] <sup>+</sup>   | 255.93295     | C7H4Cl3NO3   | Polyhalopyridines                    | REEQLXGVDJJSQ-UHFFFAOYSA-N   | OC(=O)COC1=C(Cl)C=C(Cl)C(Cl)=N1                |
| 27 | 0.701           | 303.02585  | 4-hydroxy-3-[4-(4-hydroxy-6-methyl-2-oxopyran-3-yl)methyl]-6-methylpyran-2-one                           | [M+H] <sup>+</sup>   | 303.02655     | C13H12O6     | Pyranones and derivatives            | DVLLGHPGJPEUHA-UHFFFAOYSA-N  | O=C1OC(=CC(O)=C1CC=CC(=O)OC(=CC2O)C)C          |
| 28 | 0.704           | 251.16005  | Nardosinone                                                                                              | [M+H] <sup>+</sup>   | 251.16        | C15H22O3     | Sesquiterpenoids                     | KXGHISIMRWPVQM-JWPUOXDNSA-N  | O=C1C2=CCCC(C)C2(C)C3C(OC3(C)C)C1              |
| 29 | 0.704           | 148.94887  | Trifluoromethanesulfonic acid                                                                            | [M-H] <sup>-</sup>   | 148.95258     | CHF3O3S      | PFSA                                 | ITMCEJHCFYS1IV-UHFFFAOYSA-N  | O=S(=O)(O)C(F)(F)F                             |
| 30 | 0.705           | 278.94257  | 5-Chloro-perfluoropentanoic acid                                                                         | [M-H] <sup>-</sup>   | 278.94647     | C5HClF8O2    | PFSA                                 | VQKMXAMQVPHHB-UHFFFAOYSA-N   | O=C(O)C(F)(F)C(F)(F)C(F)C(F)C(F)Cl             |
| 31 | 0.707           | 147.97292  | PFSM-perfluorooalkyl_sulfonamide                                                                         | [M-H] <sup>-</sup>   | 147.96855     | ClF2F3NO2S   | PFSA                                 | KAKQVSNHTBLJCH-UHFFFAOYSA-N  | O=S(=O)(N)C(F)(F)F                             |
| 32 | 0.709           | 370.94284  | PFFCA-pentafluorosulfide                                                                                 | [M-H] <sup>-</sup>   | 370.94168     | C5HF13O2S    | PFSA                                 | NDS1RS11HKJNN-UHFFFAOYSA-N   | O=C(O)C(F)(F)C(F)(F)C(F)(F)S(F)(F)(F)F         |
| 33 | 0.71            | 226.05573  | Synephrine hydrochloride                                                                                 | [M+H] <sup>+</sup>   | 226.06        | C9H14ClNO2   | 1-hydroxy-2-unsubstituted benzenoids | COTCEGYSNTWJQV-UHFFFAOYSA-N  | Cl.CC1=CC=C(C=C1)C(O)CNC                       |
| 34 | 0.711           | 385.87479  | [4-acetyloxy-2,5-dihydroxy-6-(hydroxymethyl)oxan-3-yl] (E)-3-(4-hydroxyphenyl)propan-2-enoate            | [M+H] <sup>+</sup>   | 385.87271     | C17H20O9     | Coumaric acid esters                 | QXRDLAXUJONPD-QPJXXVBHSA-N   | O=C(OC1C(O)OC(CO)C(O)C1OC(=O)C)CC2=CC=C(O)C=C2 |
| 35 | 0.711           | 236.03975  | Carnitine (Dl) Hydrochloride                                                                             | [M+H] <sup>+</sup>   | 236.04503     | C7H16ClNO3   | Carnitines                           | JXXCENBLGFBQJM-UHFFFAOYSA-N  | Cl.O=C([O-])CC(O)C[N+](C)(C)C                  |
| 36 | 0.714           | 189.02379  | 6,7-dihydroxybenzofuran-3(2H)-one                                                                        | [M+H] <sup>+</sup>   | 189.02        | C8H6O4       | Benzofurans                          | ZDHCVQNRWDINX-UHFFFAOYSA-N   | O=C1C2=CC=C(O)C(=O)C=C2O1                      |
| 37 | 0.714           | 308.25049  | Pentadecanoyl Ethanolamide                                                                               | [M+2H] <sup>2+</sup> | 308.25        | C17H35NO2    | N-acyl ethanolamines                 | UHPXXKLACDXGS-UHFFFAOYSA-N   | O=C(NC(=O)CCCCCCCCCCCCCCC                      |
| 38 | 0.715           | 231.03406  | 3,4-Dimethoxycinnamic Acid                                                                               | [M+H] <sup>+</sup>   | 231.03662     | C11H12O4     | Coumaric acids and derivatives       | HJWBJAPBAGSQPR-GQCTYL1ASA-N  | O=C(O)C=CC1=CC=C(OC)C(OC)=C1                   |
| 39 | 0.716           | 284.01968  | Procymidone                                                                                              | [M+H] <sup>+</sup>   | 284.02396     | C13H11Cl2NO2 | Phenylpiperidines                    | YQKJBPAVAHBARF-UHFFFAOYNA-N  | CC12CC2(C)C(N(C3=CC(=CC(=C3)C1)C1)=O)=O        |
| 40 | 0.717           | 247.02939  | columbianetin                                                                                            | [M+H] <sup>+</sup>   | 247.03241     | C14H14O4     | Angular furanocoumarins              | XQAQEMCYCSSHJG-UHFFFAOYSA-N  | O=C1OC2=C(C=C1)C=CC=CC(C2)C(O)C                |
| 41 | 0.718           | 233.03185  | MUCIC ACID                                                                                               | [M+H] <sup>+</sup>   | 233.02678     | C6H10O8      | Glucuronic acid derivatives          | DSLZVSRTYRFBF-DUHHBMHGSA-N   | O=C(O)C(O)C(O)C(O)C(=O)O                       |

|    |        |            |                                                                                                                                      |                      |            |               |                                            |                              |                                                                                       |
|----|--------|------------|--------------------------------------------------------------------------------------------------------------------------------------|----------------------|------------|---------------|--------------------------------------------|------------------------------|---------------------------------------------------------------------------------------|
| 42 | 0. 721 | 283. 02527 | 1, 3, 5, 8-Tetrahydroxyxanthone                                                                                                      | [M+H] <sup>+</sup>   | 283. 01999 | C13H8O6       | Xanthenes                                  | MPXAWSABMVLBU-UHFFFAOYSA-N   | O=C1C=2C(O)=CC(O)=CC2OC=3C(O)=CC=C(O)C13                                              |
| 43 | 0. 722 | 123. 03981 | 2-methylcyclohexa-2, 5-diene-1, 4-dione                                                                                              | [M+H] <sup>+</sup>   | 123. 04    | C7H6O2        | P-benzoquinones                            | VTWDKFNVLAEJH-UHFFFAOYSA-N   | O=C1C=CC(=O)C(=C1)C                                                                   |
| 44 | 0. 722 | 165. 03516 | Allicin + 2H (not validated, isomer of 328)                                                                                          | [M+H] <sup>+</sup>   | 165. 03999 | C6H12OS2      | Allicin derivatives                        | XLVMWOFYTFNDKM-UHFFFAOYNA-N  | O=S(CCC)SC=CC                                                                         |
| 45 | 0. 722 | 360. 93964 | PFSA-unsaturated                                                                                                                     | [M-H] <sup>-</sup>   | 360. 93979 | C6HF11O3S     | PFSA                                       | WNQXBVFTFYMUUCU-UHFFFAOYSA-N | O=S(=O)(O)C(F)(F)C(F)(F)C(F)(F)C(F)(F)C(F)(F)C(F)(F)F                                 |
| 46 | 0. 722 | 212. 03979 | PHOSPHOCREATINE                                                                                                                      | [M+H] <sup>+</sup>   | 212. 03999 | C4H10N3O5P    | Alpha amino acids and derivatives          | DRBBFCLWYRJSJZ-UHFFFAOYSA-N  | O=C(O)CN(C(=NP(=O)(O)O)N)C                                                            |
| 47 | 0. 723 | 143. 04996 | 5-(hydroxymethyl)pyrimidine-2, 4-diol                                                                                                | [M+H] <sup>+</sup>   | 143. 05    | C5H6N2O3      | Pyrimidones                                | JDBGXEHEITGOBU-UHFFFAOYSA-N  | OC1=NC=C(C(O)=N1)CO                                                                   |
| 48 | 0. 723 | 125. 03749 | N,N-Dimethylsulfamide                                                                                                                | [M+H] <sup>+</sup>   | 125. 03793 | C2H8N2O2S     | Sulfuric acid diamides                     | QMIAHUAQAJVBIW-UHFFFAOYSA-N  | CN(C)S(N)(=O)=O                                                                       |
| 49 | 0. 724 | 167. 01352 | 3-hydroxy-4-methoxy-2, 3-dihydropyran-6-one                                                                                          | [M+H] <sup>+</sup>   | 167. 01662 | C6H8O4        | Dihydropyranones                           | PBEXSRJMCVDBFK-UHFFFAOYSA-N  | O=C1OCC(O)C(OC)=C1                                                                    |
| 50 | 0. 724 | 146. 1647  | Spermidine                                                                                                                           | [M+H] <sup>+</sup>   | 146. 16518 | C7H19N3       | Dialkylamines                              | ATHGHQPGPGMSJY-UHFFFAOYSA-N  | NCCCNCCCN                                                                             |
| 51 | 0. 725 | 267. 01202 | Bauerine C                                                                                                                           | [M+H] <sup>+</sup>   | 267. 01599 | C12H8C12N2O   | Beta carbolines                            | JFESWTBLTUPGK-UHFFFAOYSA-N   | O=C1NC=CC=2C3=CC=C(C1)C(C1)=C3N(C12)C                                                 |
| 52 | 0. 726 | 329. 98038 | (E)-N-[2-hydroxy-2-(4-hydroxyphenyl)ethyl]-3-(4-hydroxy-3-methoxyphenyl)propan-2-enamide                                             | [M+H] <sup>+</sup>   | 329. 98386 | C18H19NO5     | Hydroxycinnamic acids and derivatives      | VJSCHQMOTSXKB-YCRREMBSA-N    | OC(=NCC(O)C1=CC=C(O)C=C1)C(=CC2=CC=C(O)C(OC)=C2                                       |
| 53 | 0. 727 | 103. 04988 | (R)-4-aminoisoxazolidin-3-one                                                                                                        | [M+2H] <sup>2+</sup> | 103. 05    | C3H6N2O2      | Alpha amino acids and derivatives          | DYDCUQKUCUJJBH-UWTATZPHSA-N  | O=C1NOC1N                                                                             |
| 54 | 0. 728 | 356. 97989 | 4-[1-(1,3-benzodioxol-5-yl)propan-2-yl]-4,5-dimethoxy-2-prop-2-enylcyclohexa-2,5-dien-1-one                                          | [M+H] <sup>+</sup>   | 356. 98035 | C21H24O5      | Bicyclic monoterpenoids                    | SMOHLDESHACKE-UHFFFAOYSA-N   | O=C1C=C(OC)C(OC)(C=C1CC=C)C(C)CC2=CC=C3OCC3=C2                                        |
| 55 | 0. 728 | 160. 97531 | OPFC-perfluoroalkyl_sulfate                                                                                                          | [M-H] <sup>-</sup>   | 160. 97256 | C2H4F2O4S     | PFSA                                       | LACMPONGXCPPKO-UHFFFAOYSA-N  | O=S(=O)(O)OCC(F)F                                                                     |
| 56 | 0. 728 | 221. 04977 | Pesticide2_Thiazuron_C9H8N4OS_1-Phenyl-3-(1,2,3-thiadiazol-5-yl)urea                                                                 | [M+H] <sup>+</sup>   | 221. 049   | C9H8N4OS      | N-phenylureas                              | HFCYZXMHIUHQI-UHFFFAOYSA-N   | OC(=NC1=CC=CC=C1)NC(=S)N=C2                                                           |
| 57 | 0. 729 | 281. 10614 | Huperzine A                                                                                                                          | [M+H] <sup>+</sup>   | 281. 10507 | C15H18N2O     | Quinolones and derivatives                 | ZRJBJHW1HUMBLCN-UHFFFAOYSA-N | OC=1N=C2C(=CC1)C3(N)C(=CC)C(C=C(C)C3)C2                                               |
| 58 | 0. 73  | 280. 99149 | methyl 5,6-diacetyloxy-10-hydroxy-2,4b,7,10a,12a-hexamethyl-12-methylidene-1,4,8-trioxo-da,5,6,6a,9,10,10b,11-octahydronaphthal-1,2- | [M+H] <sup>+</sup>   | 280. 99219 | C30H40O11     | Oxosteroids                                | FFXYBQSGDXRLHS-UHFFFAOYSA-N  | O=C(OC1C(OC(=O)C)C2(C)C3C(=O)OC(C(=O)C)(C(=O)C3(C(=C)C2)C4(C)C(OC(=O)C)=O)C(C1)C1)C1C |
| 59 | 0. 732 | 265. 11029 | Thiamine                                                                                                                             | [M+H] <sup>+</sup>   | 265. 11121 | C12H17N4O5    | Thiamines                                  | JJRWGCRZTMMZEH-UHFFFAOYSA-N  | CC1=C(COC)SC(=[N+])CC1=CN=C(C)NC1=N                                                   |
| 60 | 0. 741 | 189. 13409 | Homoarginine                                                                                                                         | [M+H] <sup>+</sup>   | 189. 1346  | C7H16N4O2     | Alpha amino acids                          | QUOGSRFPZMMIT-UHFFFAOYNA-N   | O=C(O)C(N)CCCCNC(=N)N                                                                 |
| 61 | 0. 743 | 188. 17538 | N8-Acetylspermidine                                                                                                                  | [M+H] <sup>+</sup>   | 188. 17574 | C9H21N3O      | Carboximidic acids                         | FON1WJDLJEJTL-UHFFFAOYSA-N   | OC(=NCCCCCCCN)C                                                                       |
| 62 | 0. 744 | 329. 07806 | 8-(2-hydroxy-1-methoxy-3-methylbut-3-enyl)-7-methoxychromen-2-one                                                                    | [M+H] <sup>+</sup>   | 329. 07858 | C16H18O5      | Coumarins and derivatives                  | DBPWCIPOCMUFT-UHFFFAOYSA-N   | O=C1OC2=C(C=C1)C(=CC(OC)=C2C(OC)C(O)C(=C)C                                            |
| 63 | 0. 744 | 133. 09662 | Ornithine                                                                                                                            | [M+H] <sup>+</sup>   | 133. 09715 | C5H12N2O3     | Alpha amino acids                          | AHLPHDHMVZTML-UHFFFAOYSA-N   | O=C(O)C(N)CCCN                                                                        |
| 64 | 0. 745 | 359. 04245 | 3-O-acetylpadmatin                                                                                                                   | [M-H] <sup>-</sup>   | 359. 04004 | C18H16O8      | 7-O-methylated flavonoids                  | WWYQJKYSCMPCP-MSOLQXFSA-N    | O=C(OC1C(=O)C2=C(O)C(=O)C=C2OC1C3=CC=C(C(O)C(=O)C3)C                                  |
| 65 | 0. 748 | 311. 06683 | Cefditoren pivoxil                                                                                                                   | [M+H] <sup>+</sup>   | 311. 06699 | C25H28N6O7S3  | Cephalosporins                             | AFZPFLVORLEPPO-OUOWMNRXSA-N  | O=C(OCOC(=O)C(C)C(C)C1C(=C(C=C2SC=NC2)CSC3NC(=O)C3N(C(=O)C(=NOC1)C=AN=C(=C4)N         |
| 66 | 0. 75  | 352. 09363 | feruloyltyramine                                                                                                                     | [M+H] <sup>+</sup>   | 352. 09457 | C18H19NO4     | Methoxyphenols                             | NPNKMSXYRADT-WEVVXLNSA-N     | OC(=NCCC1=CC=C(O)C=C1)C(=CC2=CC=C(O)C(OC)=C2                                          |
| 67 | 0. 758 | 175. 11835 | Arginine                                                                                                                             | [M+H] <sup>+</sup>   | 175. 119   | C6H14N4O2     | Arginine and derivatives                   | ODKSFYDXXFIFQN-UHFFFAOYSA-N  | O=C(O)C(N)CCCN=C(N)N                                                                  |
| 68 | 0. 758 | 371. 04456 | Norstictic acid                                                                                                                      | [M-H] <sup>-</sup>   | 371. 03799 | C18H12O9      | Diarylethers                               | IEVVSJFLBYOUCJ-UHFFFAOYSA-N  | O=CC1=C(O)C=C(C(=2C(=O)OC3=C(OC12)C4=C(C(=O)OC4)C(O)=C3C                              |
| 69 | 0. 774 | 189. 1604  | NEPSILON, NEPSILON, NEPSILON-TRIMETHYLLYSINE                                                                                         | [M+H] <sup>+</sup>   | 189. 16    | C9H20N2O2     | Alpha amino acids                          | MXNRLFUSPKVQSK-UHFFFAOYSA-N  | O=C([O-])C(N)CCCC[N-]C(C)C                                                            |
| 70 | 0. 778 | 353. 20703 | Hydroxyprogesterone                                                                                                                  | [M+H] <sup>+</sup>   | 353. 2052  | C21H30O3      | Gluco/mineralocorticoids, progestogens and | DBPWSSGDRRHUNT-UHFFFAOYSA-N  | O=C1C=C2CCC3(CCC4(C)C3CCC4(O)C(=O)C)C2(C)CC1                                          |
| 71 | 0. 783 | 341. 02631 | Pesticide4_Pyrimethanil_C12H13N3_2-Pyrimidinamine, 4,6-dimethyl-                                                                     | [M-H] <sup>-</sup>   | 341. 026   | C6H9N3        | Aminopyrimidines and derivatives           | IDQNBVFPZMCDN-UHFFFAOYSA-N   | N=C1N=C(C=C(N1)C)C                                                                    |
| 72 | 0. 786 | 429. 23834 | Irbesartan                                                                                                                           | [M+H] <sup>+</sup>   | 429. 23975 | C25H28N6O     | Biphenyls and derivatives                  | YOSHYTLCDANDAN-UHFFFAOYSA-N  | CCCCC1=NC2(CCCC2)C(N1CC3=CC=C(C=C3)C4=CC=CC=C4C5=NN=N5)=O                             |
| 73 | 0. 787 | 469. 13022 | Galapagin                                                                                                                            | [M-H] <sup>-</sup>   | 469. 129   | C20H24O10     | Phenolic glycosides                        | NJRLDXGREKHGV-IVABAYMNSA-N   | O=C(OC1OC(OC=2C(=C(O)C=3C(=O)C=C(OC32C)C)C(O)C(O)C1O)C                                |
| 74 | 0. 787 | 257. 06497 | ONONETIN                                                                                                                             | [M-H] <sup>-</sup>   | 257. 06015 | C15H14O4      | Stilbenes                                  | XHBZOAYMBBUURD-UHFFFAOYSA-N  | O=C(C1=CC=C(O)C=C1O)CC2=CC=C(OC)C=C2                                                  |
| 75 | 0. 789 | 426. 98535 | (Perfluorohexyl)ethanoic acid                                                                                                        | [M-H] <sup>-</sup>   | 426. 98209 | C9H3F15O2     | PFSA                                       | WSEBQIVQARAMW-UHFFFAOYSA-N   | O=C(O)CC(F)(F)C(F)(F)C(F)(F)C(F)(F)C(F)(F)C(F)(F)C(F)(F)F                             |
| 76 | 0. 79  | 266. 15857 | "Mirtazapine (Remeron, Avanza)"                                                                                                      | [M+H] <sup>+</sup>   | 266. 16501 | C17H19N3      | Piperazinoazepines                         | RONZAEMNMQARA-UHFFFAOYSA-N   | N=1C=CC=C2C1N3CCN(C)CC3C=4C=CC=CC4C2                                                  |
| 77 | 0. 79  | 173. 10349 | L-(+)-Arginine                                                                                                                       | [M-H] <sup>-</sup>   | 173. 1044  | C6H14N4O2     | L-alpha-amino acids                        | ODKSFYDXXFIFQN-BYPYZUCNSA-N  | N[C@H](CCCC(N)=N)C(O)=O                                                               |
| 78 | 0. 794 | 740. 6745  | Glyceryl trimyristate                                                                                                                | [M+H] <sup>+</sup>   | 740. 677   | C45H86O6      | Triacylglycerols                           | DUXYWXYOBRMGIN-UHFFFAOYSA-N  | O=C(OC(OC(=O)CCCCCCCCCCCCC)OC(=O)CCCCCCCCCCCCC)CCCCCCCCCCCC                           |
| 79 | 0. 795 | 319. 01706 | Medicagol                                                                                                                            | [M+H] <sup>+</sup>   | 319. 01999 | C16H8O6       | Coumestans                                 | UDMYEUAUWUQHON-UHFFFAOYSA-N  | O=C1OC=2C(O)C=CC2=3OC4=CC=5OCC5C=C4C13                                                |
| 80 | 0. 796 | 307. 14911 | Vincandine                                                                                                                           | [M-H] <sup>-</sup>   | 307. 1452  | C19H20N2O2    | Alkaloids                                  | JDOFCMASVRMYJU-UHFFFAOYNA-N  | CC=C1CN2CC3C4C2C1C(C=O)=C3NC1=C4C=CC=C1O                                              |
| 81 | 0. 797 | 216. 01375 | 2-amino-3-prop-2-enylsulfinylpropanoic acid                                                                                          | [M+H] <sup>+</sup>   | 216. 00912 | C6H11NO3S     | Alpha amino acids                          | XUHLJQGRKRUPH-UHFFFAOYSA-N   | O=C(O)C(N)CS(=O)CC=C                                                                  |
| 82 | 0. 797 | 292. 96927 | Daidzein                                                                                                                             | [M+H] <sup>+</sup>   | 292. 96872 | C15H10O4      | Isoflavones                                | ZQS1JRDFPHDXIC-UHFFFAOYSA-N  | O=C1C(=COC2=CC(O)=CC=C12)C=3C=CC(O)=CC3                                               |
| 83 | 0. 797 | 320. 03976 | Epalrestat                                                                                                                           | [M+H] <sup>+</sup>   | 320. 04099 | C15H13NO3S2   | Alpha amino acids and derivatives          | CHNUOJQWGUOLD-NFZZJPOKSA-N   | O=C(O)CN1C(=S)SC(=CC(=CC2=CC(=CC2)C)C1=O                                              |
| 84 | 0. 797 | 420. 95001 | Fipronil-sulfide                                                                                                                     | [M+H] <sup>+</sup>   | 420. 95108 | C12H4Cl2F6N4S | Phenylpyrazoles                            | FQXWEKADCSXVOC-UHFFFAOYSA-N  | NC1=C(SC(F)(F)C(F)=NN1C1=C(C1)C=C(C=C1)C(F)(F)F)C#N                                   |

[illegible]

|     |       |           |                                                                                                                                                                                                                                      |                     |           |              |                                     |                              |                                                                                 |
|-----|-------|-----------|--------------------------------------------------------------------------------------------------------------------------------------------------------------------------------------------------------------------------------------|---------------------|-----------|--------------|-------------------------------------|------------------------------|---------------------------------------------------------------------------------|
| 128 | 0.854 | 189.0867  | "LL-2, 6-DIAMINOHEPTANEDIOATE"                                                                                                                                                                                                       | [M-H] <sup>-</sup>  | 189.088   | C7H14N2O4    | Alpha amino acids                   | GMKMEZVLHJARHF-UHFFFAOYSA-N  | O=C(O)C(N)CCCC(N)C(=O)O                                                         |
| 129 | 0.854 | 307.11316 | 5,13,15-trihydroxy-9-methyl-10-oxabicyclo[10.4.0]hexadeca-1(12),13,15-triene-3,11-dione                                                                                                                                              | [M-H] <sup>-</sup>  | 307.11871 | C16H20O6     | Macrolides and analogues            | TXFYVWIRTECTR-UHFFFAOYSA-N   | O=C1OC(C)CC(C)CC(=O)CC(=O)CC=CC(=O)C=C(O)C12                                    |
| 130 | 0.854 | 457.16702 | 7-O-Ethylmorrisonide                                                                                                                                                                                                                 | [M+H] <sup>+</sup>  | 457.16901 | C19H30O11    | O-glycosyl compounds                | IRKPOLIBQADK-LEYIKRXSA-N     | O=C(OC)C1=CC(OC2OC(CO)C(O)C(O)C2O)C3C(OC(OC)CC13)C                              |
| 131 | 0.854 | 293.09772 | cyclopenin                                                                                                                                                                                                                           | [M-H] <sup>-</sup>  | 293.09317 | C17H14N2O3   | 1,4-benzodiazepines                 | APLKWASYUZSLB-PBH1CJAKSA-N   | O=C1C=C=CC=CC2N=C(O)C3(OC3C=4C=CC=4)N1C                                         |
| 132 | 0.854 | 365.10464 | Melibiose                                                                                                                                                                                                                            | [M+Na] <sup>+</sup> | 365.10544 | C12H22O11    | O-glycosyl compounds                | DLRVLDZNNYCB-ABXIMFFYSA-N    | OC1OC(OC22OC(O)C(O)C(O)C2O)C(O)C(O)C1O                                          |
| 133 | 0.854 | 250.09183 | Muramic acid                                                                                                                                                                                                                         | [M-H] <sup>-</sup>  | 250.09323 | C9H17N O7    | Sugar acids and derivatives         | MSFSPUZXLOGRHJ-UHFFFAOYNA-N  | O=C(O)C(OC1C(O)C(OC(O)C1N)CO)C                                                  |
| 134 | 0.854 | 229.08705 | Xanthyletin                                                                                                                                                                                                                          | [M+H] <sup>+</sup>  | 229.086   | C14H12O3     | Linear pyranocoumarins              | QOTBQVNVUBKJMS-UHFFFAOYSA-N  | O=C1OC=2C=C3OC(C=CC3=CC2=C1)C)C                                                 |
| 135 | 0.855 | 385.12561 | [(3aS,4S,5S,6E,10Z,11aR)-6-formyl-5-hydroxy-10-(hydroxymethyl)-3-methylidene-2-oxo-3a,4,5,8,9,11a-hexahydrocyclohexa[1,1-f]furan-4-yl]-2-                                                                                            | [M+H] <sup>+</sup>  | 385.12576 | C19H22O7     | Germacranolides and derivatives     | HQPSNGXRJBMAL-JVWKVRNCSA-N   | O=CC1=CCCC(=CC2OC(=O)C(=O)C2C(OC(=O)C(=O)C)C1O)CO                               |
| 136 | 0.855 | 88.03969  | L-ALANINE                                                                                                                                                                                                                            | [M-H] <sup>-</sup>  | 88.0399   | C3H7NO2      | Alanine and derivatives             | QNA5BMKLOCYPGJ-UWTATZPHSA-N  | O=C(O)C(N)C                                                                     |
| 137 | 0.855 | 164.03775 | Methioninesulfoxide                                                                                                                                                                                                                  | [M-H] <sup>-</sup>  | 164.03868 | C5H11NO3S    | Alpha amino acids                   | QEFRNWLZKMPFJ-UHFFFAOYNA-N   | O=C(O)C(N)CCS(=O)C                                                              |
| 138 | 0.856 | 220.08148 | N-Acetylglucosamine                                                                                                                                                                                                                  | [M-H] <sup>-</sup>  | 220.08266 | C8H15NO6     | N-acyl-alpha-hexosamines            | OVRNDRQMDRJTHS-UHFFFAOYNA-N  | OC(=NC1C(O)CC(CO)C(O)C1O)C                                                      |
| 139 | 0.857 | 172.07118 | Metronidazole                                                                                                                                                                                                                        | [M+H] <sup>+</sup>  | 172.07167 | C6H9N3O3     | Nitroimidazoles                     | VAOCPAMSLNLGC-UHFFFAOYSA-N   | O=N(=O)C1=CN=C(N1CCO)C                                                          |
| 140 | 0.858 | 527.15503 | Flavone base + 3O, 2MeO, O-guaiacylglycerol                                                                                                                                                                                          | [M+H] <sup>+</sup>  | 527.15509 | C27H26O11    | Flavone O-glycosides                | WXNJNHFYWEHL-UHFFFAOYNA-N    | O=C1C=C(OC2=CC(O)=CC(O)=C12)C=4C=C(OC)C(OC(CO)C(O)C=3C=CC(O)=C(OC)C=3)=C(OC)C=4 |
| 141 | 0.858 | 321.12939 | Indole-3-acetyl-L-phenylalanine                                                                                                                                                                                                      | [M-H] <sup>-</sup>  | 321.12448 | C19H18N2O3   | Amino acids                         | BUGQHORRADGONS-UHFFFAOYNA-N  | OC(CC1=CNC2=CC=CC=C12)=NC(C1=CC=CC=C1)C(O)=O                                    |
| 142 | 0.858 | 106.04941 | L-Serine                                                                                                                                                                                                                             | [M+H] <sup>+</sup>  | 106.04987 | C3H7NO3      | Serine and derivatives              | MTCFGRXJLQNBG-REOHCLBISA-N   | C([C-H](C(=O)O)N)O                                                              |
| 143 | 0.859 | 312.16492 | Xanthinol                                                                                                                                                                                                                            | [M+H] <sup>+</sup>  | 312.16663 | C13H21N5O4   | Xanthines                           | DSFGXPJYDCSWTA-UHFFFAOYNA-N  | O=C1C2=C(N=CN2CC(O)CN(C)CO)N(C(=O)N1C)O                                         |
| 144 | 0.86  | 156.04173 | 2-amino-4-hydroxypyrimidine-5-carboxylic acid                                                                                                                                                                                        | [M+H] <sup>+</sup>  | 156.03999 | C5H5N3O3     | Pyrimidinecarboxylic acids          | GBADBFAXAWZGHM-UHFFFAOYSA-N  | O=C(O)C1=CN=C(N=C1O)N                                                           |
| 145 | 0.86  | 368.11847 | 2-Chloro-N6-cyclopentyladenosine                                                                                                                                                                                                     | [M-H] <sup>-</sup>  | 368.1131  | C15H20C1N5O4 | Purine nucleosides                  | XSMYYQVWPWIZ-UHFFFAOYNA-N    | C1C=1N=C(NC2CCCC2)C=3N=CN(C3N1)C4OC(CO)C(O)C4O                                  |
| 146 | 0.86  | 147.07611 | Glutamine                                                                                                                                                                                                                            | [M+H] <sup>+</sup>  | 147.07642 | C5H10N2O3    | Alpha amino acids                   | ZDXPYRJPDNMRX-UHFFFAOYNA-N   | NC(OC(C)=N)C(O)=O                                                               |
| 147 | 0.861 | 190.07031 | N-ACETYL-DL-GLUTAMIC ACID                                                                                                                                                                                                            | [M+H] <sup>+</sup>  | 190.07001 | C7H11N O5    | Glutamic acid and derivatives       | RFMMVMVDNIPURG-YFKPBYRYSA-N  | O=C(O)CCC(NC(=O)C)C(=O)O                                                        |
| 148 | 0.862 | 412.1445  | (S,R)-Nosapine                                                                                                                                                                                                                       | [M-H] <sup>-</sup>  | 412.14017 | C22H23N O7   | Phthalide isoquinolines             | AKNNEGZIBPJZJG-MSOLQXFVSA-N  | O=C1OC(C2=CC=C(OC)C(OC)=C12)C3C4C(OC)C=5OCOC5C=C4CCN3C                          |
| 149 | 0.862 | 132.02942 | Aspartic acid                                                                                                                                                                                                                        | [M-H] <sup>-</sup>  | 132.03023 | C4H7NO4      | Aspartic acid and derivatives       | CKLJMWIZIZZRS-UHFFFAOYNA-N   | O=C(O)CC(N)C(=O)O                                                               |
| 150 | 0.862 | 298.10217 | Erythraline                                                                                                                                                                                                                          | [M+H] <sup>+</sup>  | 298.10001 | C18H19NO3    | Erythrianes                         | YOFUERNMZTRYM-UHFFFAOYSA-N   | O1C=2C=C3C(=CC2OC1)C4C(C=CC(OC)C4)=OCN5CC3                                      |
| 151 | 0.863 | 265.09296 | 5,9-dihydroxy-5,7,7-trimethyl-4,5a,6,8,8a,9-hexahydro-1H-azuleno[5,6-c]furan-3-one                                                                                                                                                   | [M-H] <sup>-</sup>  | 265.09396 | C15H22O4     | Terpene lactones                    | UIZWJQAQYBHAA-UHFFFAOYSA-N   | O=C1OC2=C1CC(O)(C)C3CC(C)(C)CC3C2O                                              |
| 152 | 0.864 | 110.05975 | 4-Aminophenol                                                                                                                                                                                                                        | [M+H] <sup>+</sup>  | 110.06004 | C6H7NO       | Aniline and substituted anilines    | PLIKAWJENQZMHA-UHFFFAOYSA-N  | c1cc(ccc1N)O                                                                    |
| 153 | 0.865 | 85.04746  | 3-Amino-1,2,4-triazole                                                                                                                                                                                                               | [M+H] <sup>+</sup>  | 85.05087  | C2H4N4       | Triazoles                           | KL5JNVNTNUIYHOU-UHFFFAOYSA-N | C1=NC(=N)NN1                                                                    |
| 154 | 0.867 | 517.13977 | 5,7-dihydroxy-6-[3,4,5-trihydroxy-6-(hydroxymethyl)oxan-2-yl]-8-[3,4,5-trihydroxy-6-(hydroxymethyl)oxan-2-yl]oxychromen-2-one                                                                                                        | [M-H] <sup>-</sup>  | 517.13855 | C21H26O15    | Coumarin glycosides                 | YRVGYJMSCQFOCA-UHFFFAOYSA-N  | O=C1OC=2C(OC3OC(CO)C(O)C(O)C3O)=C(O)C(=C(O)C(=O)C2O=C1)C4OC(CO)C(O)C4O          |
| 155 | 0.867 | 173.09402 | N-alpha-Acetyl-L-ornithine                                                                                                                                                                                                           | [M-H] <sup>-</sup>  | 173.09317 | C7H14N2O3    | N-acyl-L-alpha-amino acids          | JRLGPAXAGHMOL-LURJTMIESA-N   | CC(O)=N[C=H](CCCN)C(O)=O                                                        |
| 156 | 0.868 | 222.09625 | N-Acetyl-D-glucosamine                                                                                                                                                                                                               | [M+H] <sup>+</sup>  | 222.09721 | C8H15NO6     | N-acyl-alpha-hexosamines            | OVRNDRQMDRJTHS-RTRLPJTCSA-N  | CC(=N[C-H]1[C=H]([C=H]([C=H](CO)OC1O)O)O)O                                      |
| 157 | 0.868 | 168.06749 | Norepinephrine                                                                                                                                                                                                                       | [M-H] <sup>-</sup>  | 168.06662 | C8H11NO3     | Catechols                           | SFLSHLFXELFJZ-UHFFFAOYNA-N   | OC1=CC=C(C=C1O)C(O)CN                                                           |
| 158 | 0.869 | 527.20825 | [(1aR,1bS,2S,5aS,6R,6aS)-5a-hydroxy-1a-methyl-2-[(2S,3R,4S,5S,6R)-3,4,5-trihydroxy-6-(hydroxymethyl)oxan-2-yl]oxy-1b,2,6,6a-2-amino-5-[2-[[[(3S)-2,3-dihydroxy-2-[(1S)-1-hydroxyethyl]butanoyl]oxymethyl]anilinol-5-oxononanoic acid | [M+H] <sup>+</sup>  | 527.21338 | C25H36O12    | Terpene glycosides                  | PRWWZJHOHQKQD-SYDQWUJBSA-N   | O=C(OC1C2OC2(C)C3C(OC=CC13O)OC4OC(CO)C(O)C4O)C(=CC(OC)C(=C)C)C                  |
| 159 | 0.869 | 399.07019 | hydroxyethylbutanoyloxymethylanilinol-5-oxononanoic acid                                                                                                                                                                             | [M+H] <sup>+</sup>  | 399.06964 | C18H26N2O8   | Glutamine and derivatives           | NFINSJKQBJWEB-WAQLSPKVS-N    | O=C(O)C(N)CCC(O)=NC(=O)C=CC1COC(=O)C(O)(C)C(O)C(O)C                             |
| 160 | 0.869 | 369.18729 | Gardnerine                                                                                                                                                                                                                           | [M-H] <sup>-</sup>  | 369.18198 | C20H24N2O2   | Alkaloids                           | RBALJEFQJCAPLN-UHFFFAOYNA-N  | COC1=CC=C2C(NC3=C2CC2C(CO)C4CC3N2CC4=CC)=C1                                     |
| 161 | 0.869 | 383.16586 | Hydroxygardnutine                                                                                                                                                                                                                    | [M-H] <sup>-</sup>  | 383.16125 | C20H22N2O3   | Alkaloids                           | OUONWR1EOZMSQ-UHFFFAOYNA-N   | COC1=CC=C2C(NC3=C2C2OCC4C2N2CC(=COO)C4CC32)=C1                                  |
| 162 | 0.869 | 329.10806 | Pesticide1_halofenozide_C18H19ClN2O2_N-Benzoyl-4-chloro-N'-(2-methyl-2-propanoyl)benzohydrazide                                                                                                                                      | [M-H] <sup>-</sup>  | 329.10699 | C18H19ClN2O2 | 4-halobenzoic acids and derivatives | CNKHSLKYRMDNQ-UHFFFAOYSA-N   | O=C(NN(C)C(=O)C=CC=CC1)C(C)C(O)C2=CC=C(C1)C=C2                                  |
| 163 | 0.87  | 477.14401 | Isorhamnetin-3-galactoside                                                                                                                                                                                                           | [M-H] <sup>-</sup>  | 477.14212 | C22H22O12    | Flavonoid-3-O-glycosides            | COLRUI1RRYHYS-UHFFFAOYSA-N   | O=C1C(OC2OC(CO)C(O)C(O)C2O)=C(OC=3C(=O)C(=O)C13)C=4C=CC(OC)C=4                  |
| 164 | 0.871 | 263.17041 | Oxysphocarpine                                                                                                                                                                                                                       | [M+H] <sup>+</sup>  | 263.17001 | C15H22N2O2   | Matrine alkaloids                   | QMGGMESMCJABO-LHDUFFHYS-N    | O=C1C=CCC2N1CC3CCC(N+14)[(O-)]CCCC2C34                                          |
| 165 | 0.871 | 440.17328 | Quinadoline_B_130007                                                                                                                                                                                                                 | [M+H] <sup>+</sup>  | 440.173   | C25H21N5O3   | Pyridopyrimidines                   | GACSRZKZGCRJX-PVDOLRBSA-N    | O=C1C=2C=CC=CC3N=C3N1C4C(=O)NC3C5(C=6C=CC=CC6N7C(=O)C8N(CCC8)C75)C4             |
| 166 | 0.872 | 173.09155 | Glycyl-L-proline                                                                                                                                                                                                                     | [M+H] <sup>+</sup>  | 173.09207 | C7H12N2O3    | Dipeptides                          | KZCNQNBZMBJQJO-YFKPBYRYSA-N  | NCC(=O)N1CCCC[C=H]1C(O)=O                                                       |
| 167 | 0.872 | 292.14835 | PiperlotineC                                                                                                                                                                                                                         | [M+H] <sup>+</sup>  | 292.14999 | C16H21NO4    | Cinnamic acids and derivatives      | TYFKYDTUENTUNY-VOTSOKGWSA-N  | O=C(C=C1C(=O)CC(=O)C(OC)C(OC)=C1)N2CCCC2                                        |
| 168 | 0.872 | 309.13043 | Toddalolactone                                                                                                                                                                                                                       | [M+H] <sup>+</sup>  | 309.13    | C16H20O6     | Coumarins and derivatives           | GLWPLQBQHWYKRK-CYBMUJFWSA-N  | O=C1OC2=CC(OC)=C(C(OC)=C2C=C1)CC(O)C(O)C(O)C                                    |
| 169 | 0.873 | 234.09596 | 1-Isothiocyanato-8-(methylsulfinyl)-octane                                                                                                                                                                                           | [M+H] <sup>+</sup>  | 234.09808 | C10H19NO2S   | Sulfoxides                          | BCRXKQWQVFKZAG-UHFFFAOYNA-N  | CS(=O)CCCCCCCC=C=S                                                              |
| 170 | 0.873 | 146.09209 | 4-Guanidinobutyric acid                                                                                                                                                                                                              | [M+H] <sup>+</sup>  | 146.09241 | C5H11N3O2    | Gamma amino acids and derivatives   | TUHVJAJXIMEOSA-UHFFFAOYSA-N  | O=C(O)CCNC(=O)N                                                                 |

|     |       |           |                                                                                                                               |                    |           |             |                                                                 |                             |                                                                                           |
|-----|-------|-----------|-------------------------------------------------------------------------------------------------------------------------------|--------------------|-----------|-------------|-----------------------------------------------------------------|-----------------------------|-------------------------------------------------------------------------------------------|
| 171 | 0.874 | 283.10229 | Glycitein                                                                                                                     | [M-H] <sup>-</sup> | 283.10272 | C16H1205    | Isoflavones                                                     | DXUYAIFZCFRPTH-UHFFFAOYSA-N | O=C1C(=COC2=CC(O)=C(OC)C=C12)C=3C(OC(O)=CC3                                               |
| 172 | 0.875 | 537.16602 | Selaginpulvinin K                                                                                                             | [M-H] <sup>-</sup> | 537.16901 | C36H2605    | Fluorenes                                                       | UTTATNZ1WSODLT-UHFFFAOYSA-N | O=CC1=CC=C2C=3C(OC(O)=CC3C(4=C4C(OC)C=C4)(C5=CC=C(OC)C=C5)C2=C1C=C6C=C(C(OC)C=C6          |
| 173 | 0.875 | 349.13431 | Torseimide (Demadex)                                                                                                          | [M+H] <sup>+</sup> | 349.133   | C16H20N4O3S | Pyridinesulfonamides                                            | NGBFQHQLJINZ-UHFFFAOYSA-N   | O=C(NC(C)C)NS(=O)(=O)C1=C=NC=C1NC2=CC=CC(=O)C2                                            |
| 174 | 0.876 | 191.10188 | 2,6-diaminopimelic acid                                                                                                       | [M+H] <sup>+</sup> | 191.10265 | C7H14N2O4   | Alpha amino acids                                               | GMRKEZVLHJARHF-UHFFFAOYSA-N | C(CC(C(=O)O)N)CC(C(=O)O)N                                                                 |
| 175 | 0.876 | 289.18607 | 4-((1R,3S,5r,7r)-5,7-dimethyl-1,3-diazaadamantan-2-yl)-2-methoxyphenol                                                        | [M+H] <sup>+</sup> | 289.19    | C17H24N2O2  | Methoxyphenols                                                  | LATQZYGIAROHX-UHFFFAOYSA-N  | OC1=CC=C(C(=C1OC)C2N3CC4(C)CN2CC(C)C3)C4                                                  |
| 176 | 0.877 | 346.05377 | 2'-DEOXYGUANOSINE 5'-MONOPHOSPHATE                                                                                            | [M-H] <sup>-</sup> | 346.05499 | C10H14N5O7P | Purine 2'-deoxyribonucleoside                                   | LTFMZDNNPPEGNG-UHFFFAOYSA-N | O=C1N=C(N)NC2=C1N=CN2C3OC(COP(=O)(O)O)C(O)C3                                              |
| 177 | 0.877 | 346.12225 | Omeprazole (Prilosec)                                                                                                         | [M+H] <sup>+</sup> | 346.12201 | C17H19N3O3S | Sulfinylbenzimidazoles                                          | SUBDBMMJDZJVOS-UHFFFAOYSA-N | O=S(C1=NC=2C=C(OC)C=C2N1)CC3=NC=C(C(OC)=C3)C                                              |
| 178 | 0.877 | 288.11932 | OPHTHALMIC ACID                                                                                                               | [M-H] <sup>-</sup> | 288.12    | C11H19N3O6  | Peptoid-peptide hybrids                                         | SPLUHYDIQKURQW-UHFFFAOYSA-N | O=C(O)CN(C(=O)CCC(N(=O)O)C(=O)C(=O)C(N)CC                                                 |
| 179 | 0.877 | 138.05437 | Trigonelline                                                                                                                  | [M+H] <sup>+</sup> | 138.05499 | C7H7N02     | Alkaloids and derivatives                                       | WWNZCCKKKDOPX-UHFFFAOYSA-N  | O=C([O-])C1=CC=C[N+](=C1)C                                                                |
| 180 | 0.878 | 398.1691  | Lipothiazole A                                                                                                                | [M+H] <sup>+</sup> | 398.17401 | C18H27N3O5S | Peptides                                                        | XSLDIFFYKBCQGW-VFNNOXTSA-N  | O=C(O)C(N=C(O)CN=C(O)C=CC=IN=C(SC1)CCCCC)CO                                               |
| 181 | 0.878 | 247.175   | Santonin                                                                                                                      | [M+H] <sup>+</sup> | 247.17221 | C15H18O3    | Endemanolides, sesquiterpenolides and Estrogens and derivatives | XJHDMJURBVLE-BOCCBSBMSA-N   | O=C1C=CC2(C(=C1C)C3OC(=O)C(C)C3CC2)C                                                      |
| 182 | 0.879 | 273.19333 | d-estradiol                                                                                                                   | [M+H] <sup>+</sup> | 273.19    | C18H24O2    | Estrogens and derivatives                                       | VOXZDWNVPJITMN-ZBRFXRBCSA-N | OC1=CC=C2C(=C1)CCC3C2CC4(C)C(O)CCC34                                                      |
| 183 | 0.883 | 231.09755 | (+)-Dihydrokavain                                                                                                             | [M-H] <sup>-</sup> | 231.10266 | C14H16O3    | Kavalactones                                                    | VOOYTQRREPYRIW-LBPRGRKZSA-N | O=C1OC(CC(OC)=C1)CCC=2C=CC=CC2                                                            |
| 184 | 0.883 | 353.15369 | 1,4a-dimethyl-9-oxo-7-propan-2-yl-3,4,10,10a-tetrahydro-2H-phenanthrene-1-carboxylic acid                                     | [M+H] <sup>+</sup> | 353.15134 | C20H26O3    | Diterpenoids                                                    | MSWJSDLPCCSSNW-UHFFFAOYSA-N | O=C(O)C1(C)CCCC2(C3=CC=C(C(=C3C(=O)C12)C(C)C)C                                            |
| 185 | 0.883 | 179.05479 | 9-Fluorenone                                                                                                                  | [M-H] <sup>-</sup> | 179.05023 | C13H8O      | Fluorenes                                                       | YLQWCDQCJODRMT-UHFFFAOYSA-N | O=C1C=2C=CC=CC2C=3C=CC=CC13                                                               |
| 186 | 0.883 | 195.05017 | Gluconate                                                                                                                     | [M-H] <sup>-</sup> | 195.05103 | C6H12O7     | Medium-chain hydroxy acids and derivatives                      | RGINJXZEOKUKBD-SQOUGZDYSA-N | OC[C@H](O)[C@H](O)[C@H](O)[C@H](O)C(O)=O                                                  |
| 187 | 0.883 | 329.1813  | Guaiacin                                                                                                                      | [M+H] <sup>+</sup> | 329.17999 | C20H24O4    | Aryltetralin lignans                                            | TZAAUYCUP1YQBR-JGRMJRGVSA-N | OC1=CC=C(C(=C1OC)C2C=CC(O)=C(OC)C=C3CC(C)C2C                                              |
| 188 | 0.883 | 187.10748 | NALPHA-ACETYL-L-LYSINE                                                                                                        | [M-H] <sup>-</sup> | 187.108   | C8H16N2O3   | N-acyl-alpha amino acids                                        | VEYYWZYIYDQJM-ZETCQVMHSA-N  | O=C(NC(C(=O)O)CCCC)C                                                                      |
| 189 | 0.884 | 459.13342 | (-)-Podophyllotoxin                                                                                                           | [M-H] <sup>-</sup> | 459.12967 | C22H22O8    | Lignols                                                         | YJGVLMPVUAXIQN-UHFFFAOYNA-N | COC1=CC(=CC(OC)=C1OC)C1C2C(COC2=O)C(O)C2=C1C1OCOC1=C2                                     |
| 190 | 0.884 | 428.21259 | 2-amino-3-[[[6E,9E]-5-hydroxy-8-methoxy-5,9,13,14-tetramethyl-2-oxo-1-oxacyclotetradeca-6,9-dien-4-yl]sulfinyl]propanoic acid | [M-H] <sup>-</sup> | 428.21121 | C21H35NO6S  | Macrolides and analogues                                        | XBLHNZXAORYAC-KHQWPHVHSA-N  | O=C(O)C(N)CCC1C(=O)OC(C)C(C)CCC=C(C)C(OC)C=CC1(O)C                                        |
| 191 | 0.884 | 253.05511 | 7,2'-Dihydroxyflavone                                                                                                         | [M-H] <sup>-</sup> | 253.05063 | C15H10O4    | Flavones                                                        | NUGPQXQICGTVNA-UHFFFAOYSA-N | O=C1C=C(OC2=CC(O)=CC=C12)C=3C=CC=CC3O                                                     |
| 192 | 0.885 | 311.09625 | Seppanone A Dimethyl Ether                                                                                                    | [M-H] <sup>-</sup> | 311.09595 | C18H16O5    | Homoisoflavonoids                                               | VCNDHJFYRZQMHX-KPKJPENVSA-N | O=C1C2=CC=C(OC)C=C2OCC1=CC3=CC=C(OC)C(C)O=C3                                              |
| 193 | 0.886 | 113.02359 | FT-OH                                                                                                                         | [M-H] <sup>-</sup> | 113.02197 | C3H5F3O     | PFSA                                                            | HDBGTBNNPRCYND-UHFFFAOYSA-N | FC(F)(F)CO                                                                                |
| 194 | 0.886 | 112.0864  | Histamine                                                                                                                     | [M+H] <sup>+</sup> | 112.08692 | C5H9N3      | 2-arylethylamines                                               | NTYJJOPFLAHURM-UHFFFAOYSA-N | N1=CN=C(C1)CCN                                                                            |
| 195 | 0.886 | 124.03897 | Isonicotinic acid                                                                                                             | [M+H] <sup>+</sup> | 124.03931 | C6H5NO2     | Pyridinecarboxylic acids                                        | TWBYWODOCUKOW-UHFFFAOYSA-N  | OC(=O)C1=CC=NC=C1                                                                         |
| 196 | 0.886 | 465.10007 | Myricitrin                                                                                                                    | [M+H] <sup>+</sup> | 465.10001 | C21H20O12   | Flavonoid-3-O-glycosides                                        | DCYOADKABEMIQ-OMMUPTOHS-N   | O=C1C(OC2OC(C)C(O)C(O)C2O)=C(OC=3C=C(C)C(=O)C13)C=4C=C(C)C(O)=C(C)C4                      |
| 197 | 0.886 | 186.10512 | Norharman                                                                                                                     | [M+H] <sup>+</sup> | 186.10257 | C11H8N2     | Beta carbolines                                                 | A1PRHYZBTHREPW-UHFFFAOYSA-N | N1=C=CC2=C(C1)NC=3C=CC=CC2                                                                |
| 198 | 0.887 | 310.11353 | N2, N2-Dimethylguanosine                                                                                                      | [M-H] <sup>-</sup> | 310.11569 | C12H17N5O5  | Purine nucleosides                                              | RSPURTUNRHNVG-UHFFFAOYNA-N  | OC1=NC(=NC2=C1N=CN2C3OC(C)C(O)C3O)N(C)C                                                   |
| 199 | 0.887 | 245.11237 | palythine                                                                                                                     | [M+H] <sup>+</sup> | 245.10899 | C10H16N2O5  | Alpha amino acids and derivatives                               | KYCB1RYKYQCBFO-UHFFFAOYSA-N | O=C(O)CN=C(C(OC)=C(N)CC(O)CO)C1                                                           |
| 200 | 0.888 | 212.05486 | (+)-Baclofen                                                                                                                  | [M-H] <sup>-</sup> | 212.04839 | C10H12ClNO2 | Gamma amino acids and derivatives                               | KPYSYIEGFHWSV-UHFFFAOYNA-N  | NCC(CC(O)=O)C1=CC=C(C1)C=C1                                                               |
| 201 | 0.888 | 144.10252 | (2R)-6-methylpiperidine-2-carboxylic acid                                                                                     | [M+H] <sup>+</sup> | 144.10001 | C7H13NO2    | L-alpha-amino acids                                             | IHLDCUQIFBWSJU-PRJD1BJQSA-N | O=C(O)C1NC(C)CCC1                                                                         |
| 202 | 0.888 | 363.14069 | Gibberellin A8                                                                                                                | [M-H] <sup>-</sup> | 363.14493 | C19H24O7    | C19-gibberellin 6-carboxylic acids                              | WZRRJZYYGQOHRU-UQJXHNCSA-N  | C[C@]12[C@H]3[C@H](C(O)=O)[C@]1(C)C4[C@]2(C)[C@H](C=C1)C(=O)C(=O)C4                       |
| 203 | 0.888 | 134.08087 | N-Methylthreonine                                                                                                             | [M+H] <sup>+</sup> | 134.08118 | C5H11NO3    | L-alpha-amino acids                                             | CCAI1PMIAFGKSI-UHFFFAOYNA-N | O=C(O)C(NC)C(O)C                                                                          |
| 204 | 0.888 | 283.06604 | Xanthosine (Not validated)                                                                                                    | [M-H] <sup>-</sup> | 283.0679  | C10H12N4O6  | Nucleosides                                                     | UBORTCNDUKBEOP-UHFFFAOYNA-N | OC=IN=C(O)C(=N)=CN=C(=N1)C3OC(CO)C(O)C3(O)                                                |
| 205 | 0.889 | 290.12292 | Arbutin                                                                                                                       | [M+H] <sup>+</sup> | 290.12341 | C12H16O7    | Phenolic glycosides                                             | BJRNKVDFOYLUG-RMPHRYRLSA-N  | OC1=CC=C(OC2OC(CO)C(O)C(O)C2O)C=C1                                                        |
| 206 | 0.889 | 315.08136 | Eriodictyol 7,3'-dimethyl ether                                                                                               | [M-H] <sup>-</sup> | 315.07901 | C17H16O6    | 7-O-methylated flavonoids                                       | QZJVBGZOLNHWG-AWEZNCQLSA-N  | O=C1C2=C(O)C=C(OC)C=C2OC(C3=CC=C(C)C(OC)=C3)C1                                            |
| 207 | 0.889 | 322.11252 | Pesticide4 Flutolanil_C17H16F3N02_Benzamide, N-[3-(1-methylethoxy)phenyl]-2-(trifluoromethyl)-                                | [M-H] <sup>-</sup> | 322.10599 | C17H16F3NO2 | Benzanilides                                                    | PTCGDEVHUXTMP-UHFFFAOYSA-N  | FC(F)(F)C=C1C=CC=CC1(O)=NC2=CC=CC(OC)C=C2                                                 |
| 208 | 0.889 | 226.10651 | triacanthine                                                                                                                  | [M+H] <sup>+</sup> | 226.11    | C10H13N5    | 6-aminopurines                                                  | BEPGTHDUORHIM-UHFFFAOYSA-N  | N1=CN=C2C1=C(N=CN2CC=C(C)C)N                                                              |
| 209 | 0.891 | 352.15793 | 9-(beta-d-ribofuranosyl)zeatin                                                                                                | [M+H] <sup>+</sup> | 352.16    | C15H21N5O5  | Purine nucleosides                                              | GOSWTRUMMSCNCW-GPTCUSJASA-N | CCC(=CN=C1NC=NC2=C1N=CN2C3OC(CO)C(O)C3O)C                                                 |
| 210 | 0.891 | 479.23477 | Dehydrolicudenic acid A, 20(21)-                                                                                              | [M+H] <sup>+</sup> | 479.23999 | C27H36O6    | 11-oxosteroids                                                  | APM1CFQMLNFRZ-UHFFFAOYSA-N  | O=C(O)CCC(=C)C1CC(=O)C2(C3=C(C(=O)C12)C4(C)CCC(=O)C(C1)C4)C3O                             |
| 211 | 0.892 | 409.18039 | 2-(5-methoxy-4,8,8-trimethyl-2-oxo-2,8,9,10-tetrahydropyrano[2,3-f]chromen-3-yl)-N-(pyridin-2-yl)acetamide                    | [M+H] <sup>+</sup> | 409.17999 | C23H24N2O5  | Angular pyranocoumarins                                         | XBYYUUMUOFZSRJ-UHFFFAOYSA-N | O=C1OC2=C(C)C(OC)=CC=3OC(C)(C)CC32)C(=C1CC(=O)NC4=NC=CC=C4)C                              |
| 212 | 0.892 | 331.1601  | Cinchonine hydrochloride                                                                                                      | [M+H] <sup>+</sup> | 331.16    | C19H23ClN2O | Cinchona alkaloids                                              | IMUHLVEEYGMBC-PAAXXVDQSA-N  | C1, OC(C=1C=CN=C2C=CC=CC21)C3N4CCC(C3)C(C=C)C4                                            |
| 213 | 0.892 | 410.16357 | FucGlcNAcGA                                                                                                                   | [M+H] <sup>+</sup> | 410.16568 | C16H27N011  | N-acyl-alpha-hexosamines                                        | ZMHFWGFDQCSHY-GEHFNBAWSA-N  | C[C@H]1O[C@H](O)[C@H]2[C@H](O)[C@H](CO)O[C@H](OCC=O)[C@H]2N=C(C)O1[C@H](O)[C@H](O)[C@H]1O |

|     |       |           |                                                                                                                                                                                                                                                                              |                    |           |               |                                            |                              |                                                                                                     |
|-----|-------|-----------|------------------------------------------------------------------------------------------------------------------------------------------------------------------------------------------------------------------------------------------------------------------------------|--------------------|-----------|---------------|--------------------------------------------|------------------------------|-----------------------------------------------------------------------------------------------------|
| 214 | 0.892 | 249.10724 | Glu-Thr                                                                                                                                                                                                                                                                      | [M+H] <sup>+</sup> | 249.10811 | C9H16N2O6     | Dipeptides                                 | JSIQVR1XMINMTA-UHFFFAOYNA-N  | O=C(O)CCC(N)C(O)=NC(C(=O)O)C(O)C                                                                    |
| 215 | 0.892 | 337.15906 | Lotusine                                                                                                                                                                                                                                                                     | [M+H] <sup>+</sup> | 337.16    | C19H24NO3+    | Benzylisoquinolines                        | ZKTM_LINF1QCERN-QGZVFWFLSA-O | OC1=CC=C(C=C1)CC2C3=CC(=O)C(O)=C(C)=C3OC[N+](=C)C(C)C                                               |
| 216 | 0.892 | 235.11823 | Mepirizole                                                                                                                                                                                                                                                                   | [M+H] <sup>+</sup> | 235.11896 | C11H14N4O2    | Alkyl aryl ethers                          | RHAXSHUQ1EUEY-UHFFFAOYSA-N   | N=IC(=NC(=CC1OC)C)N2N=C(C=C2OC)C                                                                    |
| 217 | 0.892 | 303.2019  | Quercetin                                                                                                                                                                                                                                                                    | [M+H] <sup>+</sup> | 303.20657 | C15H10O7      | Flavonols                                  | REFJWTPEDVJJY-UHFFFAOYSA-N   | O=C1C(O)=C(OC=2C=C(O)C=C(O)C12)C=3C=CC(O)=C(O)C3                                                    |
| 218 | 0.892 | 457.11777 | Raltitrexed                                                                                                                                                                                                                                                                  | [M-H] <sup>-</sup> | 457.11874 | C21H22N4O6S   | Glutamic acid and derivatives              | IVTVGXNLFDRM-UHFFFAOYNA-N    | O=C(O)CCC(NC(=O)C=ISC(=CC1)N(C)CC=2C=CC3=NC(=NC(O)=C3C2)C(C)=O                                      |
| 219 | 0.893 | 372.12805 | (1r,3R,4S,5S)-4-[(2E)-3-(3,4-Dihydroxyphenyl)-2-propenoyl]oxy-1,3,5-trihydroxycyclohexanecarboxylic acid                                                                                                                                                                     | [M+H] <sup>+</sup> | 372.12891 | C16H18O9      | Quinic acids and derivatives               | GYFFKZYTFACFR-UCEFYARBSA-N   | O=C(O)C1(O)CC(O)C(OC(=O)C=CC2=CC(O)C(O)=C2)C(O)C1                                                   |
| 220 | 0.893 | 271.12787 | 3-(4-hydroxy-5-oxo-3-phenyl-2H-furan-2-yl)propanoic acid                                                                                                                                                                                                                     | [M+H] <sup>+</sup> | 271.12769 | C13H12O5      | Butenolides                                | PPZVSYNLXFYAD-UHFFFAOYSA-N   | O=C(O)CCC1OC(=O)C(O)=C1C=2C=CC=CC2                                                                  |
| 221 | 0.893 | 291.15372 | Androsterone                                                                                                                                                                                                                                                                 | [M+H] <sup>+</sup> | 291.15656 | C19H30O2      | Androgens and derivatives                  | QXBXDMJGAMFCBF-HLUDHZFRSA-N  | O=C1CCC2C3CCC4CC(O)CCC4(O)C3CCC12C                                                                  |
| 222 | 0.893 | 116.07078 | L-VALINE                                                                                                                                                                                                                                                                     | [M-H] <sup>-</sup> | 116.071   | C5H11NO2      | Valine and derivatives                     | KZSNJWFQEVHDMF-UHFFFAOYSA-N  | O=C(O)C(N)C(C)C                                                                                     |
| 223 | 0.893 | 251.1671  | Lychnopholic acid                                                                                                                                                                                                                                                            | [M+H] <sup>+</sup> | 251.16901 | C15H22O3      | Sesquiterpenoids                           | LMJMJHGFJXZGDE-WKMLJHOTSAN   | O=C(O)C1=CCCC(=C)C2CC(C)C(C)C2(O)C1                                                                 |
| 224 | 0.893 | 341.0383  | Pesticide2_Thiophanate-methyl_C12H14N4O4S2_                                                                                                                                                                                                                                  | [M-H] <sup>-</sup> | 341.039   | C12H14N4O4S2  | Benzene and substituted derivatives        | QGHREAKMXNCOA-UHFFFAOYSA-N   | O=C(OC)NC(=S)NC=1C=CC=CC1NC(=S)NC(=O)OC                                                             |
| 225 | 0.893 | 168.06474 | Pyridoxal                                                                                                                                                                                                                                                                    | [M+H] <sup>+</sup> | 168.065   | C8H9NO3       | Pyridoxals and derivatives                 | RADKZDMFGJYCB-UHFFFAOYSA-N   | O=CC1=C(O)C(=NC=C1CO)C                                                                              |
| 226 | 0.894 | 231.13382 | Kainic Acid                                                                                                                                                                                                                                                                  | [M+H] <sup>+</sup> | 231.13393 | C10H15NO4     | Kainoids                                   | VLSMHGEGTFMBEZ-OOZYFLPDSA-N  | O=C(O)CC1C(NCC1C(=O)C)C(=O)O                                                                        |
| 227 | 0.894 | 380.16791 | Kasugamycin                                                                                                                                                                                                                                                                  | [M+H] <sup>+</sup> | 380.16635 | C14H25N3O9    | Aminocyclitol glycosides                   | PVTHJAPFENJVCN-UQTMRZPGSA-N  | O=C(O)C(=CC1NC(N)C(OC1C)OC2C(O)C(O)C(O)C(O)C2O)N                                                    |
| 228 | 0.894 | 257.19839 | Sparteine                                                                                                                                                                                                                                                                    | [M+H] <sup>+</sup> | 257.20001 | C15H26N2      | Sparteine, lupanine, and related alkaloids | SLRCWJSBJZBV-ZQDZILKHSAN     | N12CCCCC1C3NC4CCCCC4C(C2)C3                                                                         |
| 229 | 0.894 | 335.14423 | Thymol-beta-D-glucoside                                                                                                                                                                                                                                                      | [M+H] <sup>+</sup> | 335.14648 | C16H24O6      | Terpene glycosides                         | GKQG1QVSMCHAFX-1BEHDNSVSA-N  | OC1OC(OC2=CC(=CC=C2C(C)C)C(O)C(O)C1O)C1O                                                            |
| 230 | 0.895 | 490.19086 | [(2R,3S,4S,5S)-4-hydroxy-2,5-bis(hydroxymethyl)-5-[(2R,3R,4S,5S,6R)-3,4,5-trihydroxy-6-(hydroxymethyl)oxan-2-yl]oxoxolan-3-yl]-(E)-3-phenylpropan-2-yl]propanamido]propanoyl]nineridine-4-carboxylic acid                                                                    | [M+H] <sup>+</sup> | 490.19189 | C21H28O12     | Cinnamic acid esters                       | AKARZAXADNXORH-WQVLSBKSAN    | O=C(OC1C(O)C(OC2OC(CO)C(O)C(O)C2O)(OC1CO)CO)C=CC=3C=CC=C3                                           |
| 231 | 0.895 | 278.12198 | 3-methoxy-6-methyl-6,7-dihydro-5h-dibenzo[c,e]azepin-2-ol                                                                                                                                                                                                                    | [M+H] <sup>+</sup> | 278.12    | C16H17NO2     | Benzazepines                               | GJHXLJRGWNKP-UHFFFAOYSA-N    | OC=1C=C2C=3C=CC=C3CN(C)CC2=CC1OC                                                                    |
| 232 | 0.895 | 286.17496 | Dendrobine                                                                                                                                                                                                                                                                   | [M+H] <sup>+</sup> | 286.17001 | C16H23NO2     | Indoles and derivatives                    | YCWJWJWRMHVMZ-JSYFJIKASAN    | O=C1OC234N(C)CC5CC(C13C2C(C)C)C45C                                                                  |
| 233 | 0.895 | 362.08304 | Fenoxaprop-P-ethyl                                                                                                                                                                                                                                                           | [M+H] <sup>+</sup> | 362.07898 | C18H16ClNO5   | 2-phenoxypropionic acid esters             | PQRBPHEKWERGT-UHFFFAOYNA-N   | O=C(OC)C(OC1=CC=C(OC2=NC=3C=CC(=O)C1=CC3O2)C=C1)C                                                   |
| 234 | 0.896 | 202.10716 | (E)-1-(4-methylquinazolin-2(1H)-ylidene)guanidine                                                                                                                                                                                                                            | [M+H] <sup>+</sup> | 202.11    | C10H11N5      | Quinazolinamines                           | ONQSKDLYYDFLL-UHFFFAOYSA-N   | N=C(N=C1N=C(C=2C=CC=CC2N1)C)N                                                                       |
| 235 | 0.896 | 392.16251 | (S)-methyl 2-(3-(6,7-dimethoxy-4-oxoquinazolin-3(4H)-yl)propanamido)-3-methylbutanoate                                                                                                                                                                                       | [M+H] <sup>+</sup> | 392.16    | C19H25N3O6    | Hybrid peptides                            | WLJIRKJXQCBEF-KRWDBZBQSA-N   | O=C(OC)C(NC(=O)CCN1C=NC=2C=C(OC)C(OC)=CC2C1=O)C(C)C                                                 |
| 236 | 0.896 | 312.19    | 17-hydroxy-3-oxo-, (17??)-19-Norpregna-5(10),9(11)-diene-21-nitrile                                                                                                                                                                                                          | [M+H] <sup>+</sup> | 312.19    | C20H25NO2     | Oxosteroids                                | VUQMQSOWZOUJR-FUMNGEBSAN     | N#CCC1(O)CCC2C3C(=CCC21C)C4=C(CC(=O)O)CC4CC3                                                        |
| 237 | 0.896 | 579.17517 | 5,7-dihydroxy-2-(4-hydroxyphenyl)-3-[(2S,3R,4S,5S,6R)-3,4,5-trihydroxy-6-[[[(2S,3R,4S,5S)-3,4,5-trihydroxyoxan-2-yl]oxymethyl]oxan-2-yl]oxy]chromen-1-[(S)-2-[(S)-2-(2-hydroxy-4-oxoquinazolin-3(4H)-yl)-3-(1H-indol-3-yl)propanamido]propanoyl]nineridine-4-carboxylic acid | [M-H] <sup>-</sup> | 579.17218 | C26H28O15     | Flavonoid-3-O-glycosides                   | YJPZVZYVHLEDNA-KSPKLRDJSA-N  | O=C1C(OC2OC(COC3OCC(O)C(O)C3O)C(O)C(O)C2O)=C(OC=4C=C(O)C=C(O)C14)C=C5C=C(CO)C=C5                    |
| 238 | 0.897 | 554.20581 | 1-[(S)-2-[(S)-2-(2-hydroxy-4-oxoquinazolin-3(4H)-yl)-3-(1H-indol-3-yl)propanamido]propanoyl]nineridine-4-carboxylic acid                                                                                                                                                     | [M+H] <sup>+</sup> | 554.20001 | C28H29N5O6    | N-acyl-alpha amino acids and derivatives   | NXJYJHDQJUYBZ-HJPUHRCSSAN    | O=C(O)C1CCN(C(=O)O)C(NC(=O)C(N2C(=O)C=3C=CC(=O)C2)CC4=C(NC=5C=CC(=O)C)C1C4                          |
| 239 | 0.897 | 185.12793 | 2-hydroxy-1-isopentyl-4-methyl-1H-imidazol-5(4H)-one                                                                                                                                                                                                                         | [M+H] <sup>+</sup> | 185.13    | C9H16N2O2     | Hydantoins                                 | CEHHMFMAIPKGU-UHFFFAOYSA-N   | O=C1N(C(O)=NC1O)CCC(C)C                                                                             |
| 240 | 0.897 | 365.15567 | GlcNAcThrNAc                                                                                                                                                                                                                                                                 | [M+H] <sup>+</sup> | 365.15546 | C14H24N2O9    | N-acyl-alpha-hexosamines                   | CUSVSKYUCVKGOL-UYHBOPCKSAN   | CC(O)=N[C(H)](CO)[C(H)](O)[C(H)]1O[C(H)](CO)[C(H)](O)[C(H)](O)Y[C(H)]1N=C(O)C=O                     |
| 241 | 0.897 | 385.25507 | Ibutilide fumarate                                                                                                                                                                                                                                                           | [M+H] <sup>+</sup> | 385.25201 | C44H76N4O10S2 | Phenylbutylamines                          | PCIORQNIRWFMV-WXXKFALUSAN    | O=C(O)C=CC(=O)O.O=S(=O)(NC1=CC=C(C=C1)C(O)CCN(C)CCCC(C)C.O=S(=O)(NC1=CC=C(C=C1)C(O)CCN(C)CCCC(C)C)C |
| 242 | 0.897 | 263.10114 | N6-benzyl-7H-purine-2,6-diamine                                                                                                                                                                                                                                              | [M+H] <sup>+</sup> | 263.10001 | C12H12N6      | 6-alkylaminopurines                        | XSSREOLCRTWEPI-UHFFFAOYSA-N  | N1=CNC2=C1N=C(N=C2NCC=3C=CC=CC3)N                                                                   |
| 243 | 0.897 | 279.1254  | Pesticide4_Oxadixyl_C14H18N2O4_                                                                                                                                                                                                                                              | [M+H] <sup>+</sup> | 279.134   | C14H18N2O4    | Anilides                                   | UWVQ1ROCKJWDKL-UHFFFAOYSA-N  | O=C1OCCN1N(C(=O)CO)C=2C(=CC=CC2)C                                                                   |
| 244 | 0.897 | 288.10703 | Rutaecarpine                                                                                                                                                                                                                                                                 | [M+H] <sup>+</sup> | 288.10999 | C18H13N3O     | Beta carbolines                            | ACGVGWSKVRYFRP-UHFFFAOYSA-N  | O=C1C=2C=CC=CC2N=C3C=4NC=5C=CC=CC54CCN13                                                            |
| 245 | 0.898 | 472.22598 | [(2R,3S,4S,5R,6R)-3,4,5-trihydroxy-6-[2-(4-hydroxyphenyl)ethoxy]oxan-2-yl]methyl 2-[2-oxo-1,3-dihydroindol-3-yl]acetate                                                                                                                                                      | [M+H] <sup>+</sup> | 472.22751 | C24H27N9O     | Saccharolipids                             | YOTVUKXJYRTAR-NAJYVHOLSA-N   | O=C(OC1OC(OC2C=CC(=O)C(=O)C(O)C1O)C13C(O)=NC=4C=C(C)C43                                             |
| 246 | 0.898 | 257.07693 | 1-Methylpseudouridine                                                                                                                                                                                                                                                        | [M-H] <sup>-</sup> | 257.07791 | C10H14N2O6    | Nucleoside and nucleotide analogues        | UVBYMV0UBXYSFY-UHFFFAOYNA-N  | O=C1N=C(O)C(C)=C(N1C)C2OC(CO)C(O)C2O                                                                |
| 247 | 0.898 | 204.12234 | Acetylcarnitine                                                                                                                                                                                                                                                              | [M] <sup>+</sup>   | 204.12248 | C9H18NO4      | Acyl carnitines                            | RDHQFKQ1GNGIED-UHFFFAOYNA-O  | O=C(OC(CC(=O)O)C[N+](C)C)C(C)C                                                                      |
| 248 | 0.898 | 347.14291 | alboecycline                                                                                                                                                                                                                                                                 | [M+H] <sup>+</sup> | 347.1416  | C18H28O4      | Macrolides and analogues                   | BYWNDLJLWPPJP-REXWONOSSAN    | O=C1OC(C)C(C)CCC=C(C)C(OC)C=CC(O)(C=C1)C                                                            |
| 249 | 0.898 | 354.17535 | Dihydrozeatin riboside                                                                                                                                                                                                                                                       | [M+H] <sup>+</sup> | 354.17719 | C15H22N5O5    | Purine nucleosides                         | DBVYQDG1JAUFAZ-XXYADJKSSAN   | CC(CO)CCN1C2=CN(=CN([C@H]3O[C@H](CO)[C@H](O)[C@H]3O)C2=NC=N1                                        |
| 250 | 0.898 | 319.14841 | Erianin                                                                                                                                                                                                                                                                      | [M+H] <sup>+</sup> | 319.14999 | C18H22O5      | Stilbenes                                  | UXDFUVFNIAJEGM-UHFFFAOYSA-N  | OC1=CC(=CC=C1OC)CCC2=CC(OC)=C(OC)C(OC)=C2                                                           |
| 251 | 0.899 | 241.1541  | (4R,4aS,6R)-6-isopropenyl-4,4a-dimethyl-4,4a,5,6,7,8-hexahydro-2(3H)-naphthalenone                                                                                                                                                                                           | [M+H] <sup>+</sup> | 241.16    | C15H22O       | Eremophilane, 8,9-secoeremophilane and     | WTOYNNKBUVYIKC-JMSVASOKSAN   | O=C1C=C2CCC(C(=O)C)CC2(C)C(C)C1                                                                     |
| 252 | 0.899 | 371.18024 | 2-(furan-3-yl)-7,8-dihydroxy-6a,7,10b-trimethyl-octahydro-1H-naphthol[2,1-c]naphran-4-one                                                                                                                                                                                    | [M+H] <sup>+</sup> | 371.17999 | C20H28O5      | Diterpene lactones                         | RBEATXBLJUTDQZ-UHFFFAOYSA-N  | O=C1OC(C=2C=CC(C3(C)C1CCC4(C)C3OCC(O)C4)O)C(O)C                                                     |
| 253 | 0.899 | 185.05571 | 2,3-Dihydroxybiphenyl                                                                                                                                                                                                                                                        | [M-H] <sup>-</sup> | 185.06081 | C12H10O2      | Biphenyls and derivatives                  | YKQAAJBYBTSBS-UHFFFAOYSA-N   | C1=CC=C(C=C1)C=2C=CC=C(C2O)O                                                                        |
| 254 | 0.899 | 623.20239 | 3-[(2S,3R,4S,5S,6R)-4,5-dihydroxy-6-(hydroxymethyl)-3-[(2S,3R,4S,5R,6R)-3,4,5-trihydroxy-6-(hydroxymethyl)oxan-2-yl]oxoxan-2-yl]oxy-5-hydroxy-2-yl]propanamido]propanoyl]nineridine-4-carboxylic acid                                                                        | [M-H] <sup>-</sup> | 623.20544 | C28H32O16     | Flavonoid-3-O-glycosides                   | PNBEMXOTFKPQL-PVZBESAUSAN    | O=C1C(OC2OC(CO)C(O)C(O)C2OC3OC(CO)C(O)C(O)C3O)=C(OC4=C(C)OC)=CC(O)=C14)C=C5C=CC(O)=C5               |
| 255 | 0.899 | 299.15945 | Auraptene                                                                                                                                                                                                                                                                    | [M+H] <sup>+</sup> | 299.16    | C19H22O3      | Terpene lactones                           | RSDDHGSKLOSQFK-RVDMUPIBSAN   | O=C1OC=2C=C(OC=C(C)CCC=C(C)C)C=CC2=C1                                                               |
| 256 | 0.899 | 251.1013  | Dehydroeffusol                                                                                                                                                                                                                                                               | [M+H] <sup>+</sup> | 251.10001 | C17H14O2      | Phenanthrois                               | GSSPKCPIRDPBQE-UHFFFAOYSA-N  | OC=1C=C(C=C)C=2C(=CC=C3C2=CC(O)=C3)C1                                                               |

|     |       |           |                                                                                                                           |                    |           |             |                                           |                              |                                                                                          |
|-----|-------|-----------|---------------------------------------------------------------------------------------------------------------------------|--------------------|-----------|-------------|-------------------------------------------|------------------------------|------------------------------------------------------------------------------------------|
| 257 | 0.899 | 304.14941 | evodiamine                                                                                                                | [M+H] <sup>+</sup> | 304.14999 | C19H17N3O   | Beta carbolines                           | TXDUTHBFYKGSAB-UHFFFAOYSA-N  | O=C1C=2C=C=CC2N(C)C3C=4NC=5C=CC=CC54CCN13                                                |
| 258 | 0.899 | 347.17996 | Isorosmanol                                                                                                               | [M+H] <sup>+</sup> | 347.17999 | C20H26O5    | Diterpene lactones                        | UXVPWKTDIRJELA-CLWJZODNSA-N  | O=C1OC2C3=CC(=C(O)C(O)=C3C14CCCC(C)C)C4C2O)C(C)C                                         |
| 259 | 0.899 | 397.15878 | Myrsilignan                                                                                                               | [M+H] <sup>+</sup> | 397.16    | C21H26O6    | Lignans, neolignans and related compounds | ULZFTGWWPHYLG1-UHFFFAOYSA-N  | OC1=CC=C(C=C1OC)C(O)C(OC2=C(OC)C=C(C=C2OC)CC)=C                                          |
| 260 | 0.899 | 189.12294 | N-epsilon-Acetyllysine                                                                                                    | [M+H] <sup>+</sup> | 189.12337 | C8H16N2O3   | D-alpha-amino acids                       | DTERQVGMUDWYAZ-UHFFFAOYNA-N  | O=C(O)C(N)CCCCN=C(O)C                                                                    |
| 261 | 0.899 | 237.12297 | Pesticide1_Cymoxanil_C7H10N4O3_(2E)-2-Cyano-N-(ethylcarbamoyl)-2-(methoxymino)acetamide                                   | [M+H] <sup>+</sup> | 237.123   | C7H10N4O3   | Oxime ethers                              | XERJKGBORTKEO-VZUCSPMQSA-N   | N#CC(=NOC)C(O)=NC(O)=NCC                                                                 |
| 262 | 0.899 | 209.12801 | Pilocarpine                                                                                                               | [M+H] <sup>+</sup> | 209.12801 | C11H16N2O2  | Alkaloids and derivatives                 | QCCHTSOMWOSFDM-UHFFFAOYSA-N  | O=C1OCC(C2=C=CN2C)C1CC                                                                   |
| 263 | 0.9   | 355.19733 | 14-deoxy-11,12-dihydroandrographolide                                                                                     | [M+H] <sup>+</sup> | 355.20001 | C20H28O4    | Diterpene lactones                        | GQPOXOPEDHHRQT-CRBRZBIVSA-N  | O=C1OCC(C=CC2C(=C)CC3C(C)(CO)C(O)CCC23C)=C1                                              |
| 264 | 0.9   | 327.15308 | Acepromazine                                                                                                              | [M+H] <sup>+</sup> | 327.15256 | C19H22N2O5  | Phenothiazines                            | NOSIYYJFMPDDSA-UHFFFAOYSA-N  | CN(C)CCCN1C2=CC=C(C=C2)C2C1C=C(C=C2)C(C)=O                                               |
| 265 | 0.9   | 152.05614 | Guanine                                                                                                                   | [M+H] <sup>+</sup> | 152.05669 | C5H5N5O     | Purines and purine derivatives            | UYTPUPDQBNUYG-UHFFFAOYSA-N   | c1nc2c([nH]c1)[nH]c(=N)nc2O                                                              |
| 266 | 0.9   | 292.13849 | N-Fructosyl isoleucine                                                                                                    | [M+H] <sup>+</sup> | 292.1391  | C12H23N2O7  | N-Fructosyl amino acids                   | VYGRYVGPYFYCA-UHFFFAOYNA-N   | O=C(O)C(NCC1(O)(OC(CO)C(O)C1))C(C)CC                                                     |
| 267 | 0.901 | 317.17029 | [6]-Gingerol                                                                                                              | [M+H] <sup>+</sup> | 317.17001 | C17H26O4    | Gingerols                                 | NLDDIKRKFEXWB-AWEZNCQLSA-N   | O=C(CCC1=CC=C(O)C(OC)=C1)CC(O)CCCC                                                       |
| 268 | 0.901 | 251.07591 | 2'-Deoxyinosine                                                                                                           | [M+H] <sup>+</sup> | 251.07858 | C10H12N4O4  | Purine 2'-deoxyribonucleosides            | VGONTNSXDCQUGY-RRKRQDMSA-N   | OC[C@H]1O[C@H](C[C@H]1O)N1C=NC2=C1N=CN=C2O                                               |
| 269 | 0.901 | 256.09259 | 2'-O-Methylcytidine                                                                                                       | [M+H] <sup>+</sup> | 256.0939  | C10H15N3O5  | Pyrimidine nucleosides                    | RFCQJGFZUQYRF-UHFFFAOYNA-N   | N=C1N=C(O)N(C=C1)C2OC(CO)C(C)C2OC                                                        |
| 270 | 0.901 | 237.08633 | 3,4-dihydro-2,2-dimethyl-indeno[1,2-b]-pyran-5(2H)-one                                                                    | [M+H] <sup>+</sup> | 237.08501 | C14H14O2    | Indenes and isoenindenes                  | ICNOFNFXLJFTLZ-UHFFFAOYSA-N  | O=C1C=2C=CC(=C2)C3=C(C)C(C)C(C)C3                                                        |
| 271 | 0.901 | 442.19034 | butyrolactone i                                                                                                           | [M+H] <sup>+</sup> | 442.186   | C24H24O7    | Fatty acid esters                         | NGOLMNMWQHWKEU-XMMP1XPASA-N  | O=C1OC(C(=O)OC)(C=C1O)C2C=CC(O)=CC2CC3=CC=C(O)C(C=C3)CC=C(C)C                            |
| 272 | 0.901 | 260.15964 | Isoleucylglutamine                                                                                                        | [M+H] <sup>+</sup> | 260.16    | C11H21N3O4  | Dipeptides                                | CNPNGHRMBQHBZ-UHFFFAOYNA-N   | O=C(O)C(NC(=O)C(N)C(C)C)CCC(=O)N                                                         |
| 273 | 0.901 | 188.05731 | N-Acetylglutamic acid                                                                                                     | [M+H] <sup>+</sup> | 188.05644 | C7H11N2O5   | Glutamic acid and derivatives             | RPMVMVDN1PUKGG-UHFFFAOYNA-N  | O=C(O)CCC(N=C(O)C)C(=O)O                                                                 |
| 274 | 0.901 | 194.11696 | Pesticide2_Isopropcarb_C1H15N2O2_2-Isopropylphenyl methylcarbamate                                                        | [M+H] <sup>+</sup> | 194.117   | C11H15N2O2  | Cumenes                                   | QBSJMK1UKICUGNG-UHFFFAOYSA-N | OC(=NC)OC1=C=CC=CC1C(C)C                                                                 |
| 275 | 0.901 | 303.03775 | Thymidine-3',5'-cyclic monophosphate sodium salt                                                                          | [M+H] <sup>+</sup> | 303.03876 | C10H13N2O7P | Pyrimidones                               | QSJFDQVQZVUQ6-UHFFFAOYNA-N   | CC1=CN(C2CC3OP(O)(=O)CC3OC2)C(=O)NC1=O                                                   |
| 276 | 0.902 | 382.16867 | Azelastine                                                                                                                | [M+H] <sup>+</sup> | 382.16806 | C22H24ClN3O | Phthalazinones                            | MBUVEWMHONZEDQ-UHFFFAOYNA-N  | CN1CCCC(C1)N2C(C3=C=CC=C3C(C4=CC=C(C=C4)C1)=N2)=O                                        |
| 277 | 0.902 | 627.14978 | Baimeside                                                                                                                 | [M+H] <sup>+</sup> | 627.15002 | C27H30O17   | Flavonoid-3-O-glycosides                  | RDUAJ1JVNHTQ-UJEXCLDQSA-N    | O=C1C(OC2OC(CO)C(O)C(=O)C2OC3OC(CO)C(C)C3O)=CC(=OC)=4C=C(CO)C=C(CO)C14C=5C=C(CO)=C(CO)C5 |
| 278 | 0.902 | 255.09207 | Chrysin                                                                                                                   | [M+H] <sup>+</sup> | 255.09    | C15H10O4    | Flavones                                  | RT1XKCRFFJGDFG-UHFFFAOYSA-N  | O=C1C=C(OC2=C(O)C=C(C)C2)C=C3C=CC=CC3                                                    |
| 279 | 0.902 | 300.10641 | Erysovine                                                                                                                 | [M+H] <sup>+</sup> | 300.10001 | C18H21N3O3  | Erythrinanes                              | IHPMURIXWRKED-UHFFFAOYSA-N   | OC=1C=C2C(=CC1OC)CCN3CC=C4C=CC(OC)CC423                                                  |
| 280 | 0.902 | 164.07068 | Phenylalanine (Not validated)                                                                                             | [M+H] <sup>+</sup> | 164.0708  | C9H11N2O2   | Amino acids                               | COLNVLDHWKLR1-UHFFFAOYNA-N   | O=C(O)C(N)CC1=CC=CC=C1                                                                   |
| 281 | 0.903 | 454.19165 | 3,7,21-trihydroxy-17,17-dimethyl-14-(3-methylbut-2-en-1-yl)-10,12,16-trioxapentacyclo[11.8.0.02,22.02,2,022,22]henicosane | [M+H] <sup>+</sup> | 454.186   | C25H24O7    | 8-prenylated isoflavanones                | DQNIISLSDHTEPL-UHFFFAOYSA-N  | O=C1C2=C(O)C=3C=CC(OC3C(=C2OC4OC5=CC(O)=CC=C5C4)CC=C(C)C(C)C                             |
| 282 | 0.903 | 271.09088 | Alloimperatorin                                                                                                           | [M+H] <sup>+</sup> | 271.09    | C16H14O4    | 8-hydroxypsoralens                        | KDXVZYMSYLWJMA-UHFFFAOYSA-N  | O=C1OC=2C(O)=C3OC=CC3C(C2C=C1)CC=C(C)C                                                   |

|     |        |            |                                                                                                                                           |                    |            |             |                                                                            |                             |                                                                                          |
|-----|--------|------------|-------------------------------------------------------------------------------------------------------------------------------------------|--------------------|------------|-------------|----------------------------------------------------------------------------|-----------------------------|------------------------------------------------------------------------------------------|
| 300 | 0. 908 | 161. 10692 | Tryptamine                                                                                                                                | [M+H] <sup>+</sup> | 161. 10699 | C10H12N2    | Tryptamines and derivatives                                                | APJYDQYAXCRM-UHFFFAOYSA-N   | NCCC1=CN=C-2C=CC=C21                                                                     |
| 301 | 0. 909 | 525. 1203  | (2S, 3R, 4aS, 12bR)-2, 3, 4a, 8-tetrahydroxy-12b-(5-hydroxy-6-methyloxan-2-yl)oxy-3-methyl-2, 4-dihydrobenzofalanthracene-1, 7, 12-trione | [M+H] <sup>+</sup> | 525. 11572 | C25H26O10   | Anthraquinone glycosides                                                   | CKZMKYSFWSICZ-GTJLABFSSA-N  | O=C1C=2C=CC3(O)CC(O)(C)C(O)C(=O)C3(O)C4OC(C)C(O)CC4)C2C(=O)C=5C=C(C(=O)C)C15             |
| 302 | 0. 909 | 421. 17996 | 15-Acetoxyeremantholide B                                                                                                                 | [M+H] <sup>+</sup> | 421. 17999 | C22H28O8    | Furofurans                                                                 | UNFGPCUYMXWDG-OOQPEQBPSA-N  | O=C(OC(C1=CC2OC(=O)C3(C)C2C(OC3(O)C(C)C)CC4(OC1=CC4=O)C)C                                |
| 303 | 0. 909 | 409. 10858 | 5, 7-dihydroxy-2-(4-hydroxy-3-methoxyphenyl)-6-(3-methylbut-2-enyl)-2, 3-dihydrochromen-4-one                                             | [M+H] <sup>+</sup> | 409. 1048  | C21H22O6    | 6-prenylated flavanones                                                    | GWGVAPNTKLROZ-UHFFFAOYSA-N  | O=C1C2=C(O)C(=C(O)C=C2OC(C3=CC=C(O)C(OC)=C3)C1)CC=C(C)C                                  |
| 304 | 0. 909 | 133. 01364 | D-(+)-Malic acid                                                                                                                          | [M-H] <sup>-</sup> | 133. 01425 | C4H6O5      | Beta hydroxy acids and derivatives                                         | BJEPYKJPYRNKOW-UWTATZPHSA-N | O[C=H](CC(O)=O)C(O)=O                                                                    |
| 305 | 0. 909 | 305. 06287 | Flavanol base + 50                                                                                                                        | [M-H] <sup>-</sup> | 305. 06491 | C15H14O7    | Flavanol O-glycosides                                                      | XMOCLSLCDHWHP-UHFFFAOYNA-N  | OC3=CC(O)=C2C(OC(C1=CC(O)=C(O)C(O)=C1)C(O)C2)=C3                                         |
| 306 | 0. 91  | 291. 08328 | Epicatechin                                                                                                                               | [M+H] <sup>+</sup> | 291. 08401 | C15H14O6    | Catechins                                                                  | PFTAWBLQPZVEMU-UKRRQHQSNA-N | OC=C(C(O)C2=C(OC(C3=CC=C(O)C(O)=C3)C(O)C2)C1                                             |
| 307 | 0. 91  | 327. 11667 | Eucalyptin                                                                                                                                | [M+H] <sup>+</sup> | 327. 116   | C19H18O5    | 7-O-methylated flavonoids                                                  | NHMMAMIRMITGRD-UHFFFAOYSA-N | O=C1C=C(OC2=C1C(O)=C(C(OC)=C2)C)C=C3=CC(OC)=CC3                                          |
| 308 | 0. 91  | 137. 04549 | Hypoxanthine                                                                                                                              | [M+H] <sup>+</sup> | 137. 04579 | C5H4N4O     | Hypoxanthines                                                              | FDQGSTZJBFJUBT-UHFFFAOYSA-N | c1nc2c([nH]1)ncnc20                                                                      |
| 309 | 0. 91  | 328. 13754 | N-Fructosyl phenylalanine                                                                                                                 | [M+H] <sup>+</sup> | 328. 13879 | C15H21N07   | N-Fructosyl amino acids                                                    | FAVRCIXPIVJIPN-UHFFFAOYNA-N | O=C(O)C(NCC1(O)(OC(CO)C(O)C1(O)))CC2=CC=CC=C2                                            |
| 310 | 0. 911 | 173. 05659 | 1-naphthalenecarboxaldehyde, 2-hydroxy                                                                                                    | [M+H] <sup>+</sup> | 173. 05971 | C11H8O2     | Naphthols and derivatives                                                  | NTCCNERMXRIPTR-UHFFFAOYSA-N | C1=CC=C2C(=C1)C=CC(=C2C)=O                                                               |
| 311 | 0. 911 | 115. 00303 | Maleic acid                                                                                                                               | [M-H] <sup>-</sup> | 115. 00368 | C4H4O4      | Dicarboxylic acids and derivatives                                         | VZCYOOQTPCHOFL-UHRSURJSA-N  | OC(=O)C=C(C(O)=O)                                                                        |
| 312 | 0. 911 | 245. 185   | N-L-Leucyl-L-leucine                                                                                                                      | [M+H] <sup>+</sup> | 245. 18597 | C12H24N2O3  | Peptides                                                                   | LCPYQJ1KPJDLB-UHFFFAOYSA-N  | O=C(O)C(NC(=O)C(N)CC(C)C)CC(C)C                                                          |
| 313 | 0. 912 | 452. 22025 | (3, 5, 14-trihydroxy-13-methyl-17-(5-oxo-2, 5-dihydrofuran-3-yl)hexadecahydro-1H-cyclopenta[al]phenanthren-10-yl)methyl nitrate           | [M+H] <sup>+</sup> | 452. 22    | C23H33N08   | Cardenolides and derivatives                                               | HCEPYGKCFDOPJ-UHFFFAOYSA-N  | O=C1OCC(=C1)C2CC3(C)CC4CC5(O)CC(O)CC5(CO[N+](=O)[O-])C4OC23C                             |
| 314 | 0. 912 | 132. 10138 | Isoleucine                                                                                                                                | [M+H] <sup>+</sup> | 132. 1019  | C6H13N02    | Isoleucine and derivatives                                                 | AGPKZVBTJJNPAG-UHFFFAOYNA-N | CCC(C)C(N)C(O)=O                                                                         |
| 315 | 0. 912 | 585. 30957 | lappaconitine                                                                                                                             | [M+H] <sup>+</sup> | 585. 31    | C32H44N2O8  | Lappaconitine-type diterpenoid alkaloids                                   | NBWCXBPKTTZNQ-GSAAXPBRSA-N  | O=C(OC12CN(C)C3C4CC1C3(C(OC)CC2)C5C6C(OC)CC4(O)C5(O)C6OC)C=C7C=CC=C7N(C)=O)C             |
| 316 | 0. 912 | 163. 02548 | Lumazine                                                                                                                                  | [M-H] <sup>-</sup> | 163. 02615 | C6H4N4O2    | Pteridines and derivatives                                                 | UYEUXMDVNYCAM-UHFFFAOYSA-N  | OC=1N=C(O)C2=NC=CN=C2N1                                                                  |
| 317 | 0. 912 | 154. 04941 | Mesalazine                                                                                                                                | [M+H] <sup>+</sup> | 154. 04987 | C7H7N03     | Aminobenzoic acids                                                         | KBOPZPXVLCULAV-UHFFFAOYSA-N | C1=CC(=C(C=C1N)C(=O)O)O                                                                  |
| 318 | 0. 912 | 303. 08398 | N-Acetylaspartylglutamic acid                                                                                                             | [M-H] <sup>-</sup> | 303. 08337 | C11H16N2O8  | Dipeptides                                                                 | OPVPKGADVGKTG-UHFFFAOYNA-N  | O=C(O)CCC(N(=O)C)C(N=C(O)C)CC(=O)C(O)C(=O)O                                              |
| 319 | 0. 913 | 220. 11786 | Pantothenic acid                                                                                                                          | [M+H] <sup>+</sup> | 220. 11795 | C9H17N05    | Secondary alcohols                                                         | GHOXGWTUJEAQD-UHFFFAOYSA-N  | CC(C)(CO)C(C(=NCCC(=O)O)O)O                                                              |
| 320 | 0. 913 | 153. 07565 | Ribitol                                                                                                                                   | [M+H] <sup>+</sup> | 153. 07574 | C5H12O5     | Sugar alcohols                                                             | HEBKCHPVOIAGTA-ZXFHETHRNA-N | OC[C=H](O)[C-](H)(O)[C-](H)(O)CO                                                         |
| 321 | 0. 914 | 370. 20917 | allocryptopine                                                                                                                            | [M+H] <sup>+</sup> | 370. 21036 | C21H23N05   | Protopine alkaloids                                                        | HYBRYAPKQCZIAE-UHFFFAOYSA-N | O=C1C2=CC=3OCOC3C=C2CC(N)CC4=C(OC)C(C)C(OC)=CC=C4C1                                      |
| 322 | 0. 915 | 159. 02898 | 2-OXOADIPATE                                                                                                                              | [M-H] <sup>-</sup> | 159. 02901 | C6H8O5      | Medium-chain keto acids and derivatives                                    | FGSBNBHOZHUBO-UHFFFAOYSA-N  | O=C(O)C(=O)CCCC(=O)O                                                                     |
| 323 | 0. 916 | 495. 10931 | Flavonol base + 40, 1Me0, 0-Hex                                                                                                           | [M+H] <sup>+</sup> | 495. 11292 | C22H22O13   | Flavonol O-glycosides                                                      | AFCDXKGLUDDCK-UHFFFAOYNA-N  | O=C2C(O)=C(OC=3C=C(OC1OC(C)C(O)C1(O)C1(O)C(OC)=C(O)C2=3)C4=C(C=C(O)C)C=C4                |
| 324 | 0. 916 | 301. 10318 | Haematoxilin                                                                                                                              | [M-H] <sup>-</sup> | 301. 10031 | C16H14O6    | 1-benzopyrans                                                              | WZUVPKKBWHMQCE-UHFFFAOYSA-N | OC1=CC=C2C(OC(C)CC4=CC(O)=C(O)C=C4C23)=C1O                                               |
| 325 | 0. 916 | 335. 05991 | Pachyrrhizin                                                                                                                              | [M-H] <sup>-</sup> | 335. 05612 | C19H12O6    | Isoflav-3-enones                                                           | PENSQRMNZZWMGV-UHFFFAOYSA-N | O=C1OC2=CC=3OC=CC3C=C2C=C1C=4C=C5OCOC5=CC4OC                                             |
| 326 | 0. 918 | 204. 08644 | 7-Methylsulfonylheptyl isothiocyanate                                                                                                     | [M+H] <sup>+</sup> | 204. 08752 | C9H17NS2    | Glucosinolate breakdown metabolites                                        | LDIRGNDMTGVRB-UHFFFAOYSA-N  | CSCCCCCCCNC=S                                                                            |
| 327 | 0. 918 | 103. 03886 | ACETOACETATE                                                                                                                              | [M+H] <sup>+</sup> | 103. 04    | C4H6O3      | Short-chain keto acids and derivatives                                     | WDJHALXBUFZDSR-UHFFFAOYSA-N | O=C(O)CC(=O)C                                                                            |
| 328 | 0. 918 | 117. 05432 | Ketoisovaleric acid                                                                                                                       | [M+H] <sup>+</sup> | 117. 05462 | C5H8O3      | Short-chain keto acids and derivatives                                     | QHKABHOEWYVLI-UHFFFAOYSA-N  | O=C(O)C(=O)C(C)C                                                                         |
| 329 | 0. 918 | 273. 03693 | Phenylbenzimidazole sulfonic acid                                                                                                         | [M-H] <sup>-</sup> | 273. 03394 | C13H10N2O3S | Phenylbenzimidazoles                                                       | UVCJGUGAGLPAA-UHFFFAOYSA-N  | C1=CC=C(C=C1)C2=NC=3C=CC(=CC3N2)S(O)(=O)=O                                               |
| 330 | 0. 918 | 523. 10327 | Protopseudohypericin                                                                                                                      | [M+H] <sup>+</sup> | 523. 09998 | C30H18O9    | Perylenequinones                                                           | QFAPJWSQKUFHAP-UHFFFAOYSA-N | O=C1C2=C(O)C=C(C=C2C3=4C=5C=C(C=C(O)C5C(=O)C6=C(O)C=C(O)C(=C7C(O)=CC(O)=C1C73)=C64)O)C   |
| 331 | 0. 921 | 425. 10352 | [3-hydroxy-3-methyl-1-(7-oxofuro[3, 2-g]chromen-9-yl)oxybutan-2-yl] (Z)-2-methylbut-2-enoate                                              | [M+H] <sup>+</sup> | 425. 10196 | C21H22O7    | Psoralens                                                                  | VJVXQSFKVUEFY-XG1CHPGQSA-N  | O=C1OC2=C(OC(C(OC(=O)C(=CC)C(O)(C)C)C=3OC=CC3C=C2C=C1                                    |
| 332 | 0. 922 | 406. 10947 | 8-(azepan-1-ium-1-ylmethyl)-3-(4-chlorophenyl)-4-oxo-4H-chromen-7-olate                                                                   | [M+H] <sup>+</sup> | 406. 10999 | C22H22ClN03 | Isoflavones                                                                | LUXRPLCGZWQEC-UHFFFAOYSA-N  | O=C1C(=COC=C2C1=CC=C(C(=O)C2C1N)13CCCCC3)C=C4C=CC(C1)=CC4                                |
| 333 | 0. 922 | 285. 10693 | 8-hydroxy-5, 8a-dimethyl-3-methylidene-3a, 4, 4a, 8, 9, 9a-hexahydrobenzo[f[1]l]benzofuran-2, 7-dione                                     | [M+H] <sup>+</sup> | 285. 10971 | C15H18O4    | Eudesmanolides, sesquidesmanolides, and p-Hydroxybenzoic acid alkyl esters | XAFJ1JZCMNHLRS-UHFFFAOYSA-N | O=C1OC2CC3(C)C(O)C(=O)C=C(C)C3CC2C1=C                                                    |
| 334 | 0. 923 | 453. 09949 | 1-(2R, 3S, 4S, 5R, 6S)-6-(3, 4-dihydroxybenzoyl)oxy-3, 4, 5-trihydroxyoxan-2-yl)methyl 3, 4-dihydroxybenzoate                             | [M+H] <sup>+</sup> | 453. 10275 | C20H20O12   | 19-gibberellin 6-carboxylic acids                                          | VNQNUOLCMXPFER-XDCWJTEKSA-N | O=C(OC1OC(OC(=O)C2=CC=C(O)C(O)=C2)C(O)C(O)C1O)C3=CC=C(O)C(O)C=C3                         |
| 335 | 0. 924 | 369. 18414 | Gibberellin A4A7                                                                                                                          | [M+H] <sup>+</sup> | 369. 18405 | C19H22O5    | Dicarboxylic acids and derivatives                                         | SEEGHKWBVBQTF-UKJRIFTCSA-N  | O=C(O)C1C2C3(OC(=O)C2(C)C(O)C=C3)C4CCCC(C)C(C)C1C45                                      |
| 336 | 0. 927 | 103. 00303 | MALONATE                                                                                                                                  | [M-H] <sup>-</sup> | 103. 003   | C3H4O4      | Dicarboxylic acids and derivatives                                         | OFQBLEULBTSOW-UHFFFAOYSA-N  | O=C(O)CC(=O)O                                                                            |
| 337 | 0. 929 | 222. 01904 | 5-Aminonaphthalene-2-sulfonic acid                                                                                                        | [M-H] <sup>-</sup> | 222. 02304 | C10H9NO3S   | 2-naphthalene sulfonates                                                   | OPBJYQVRSWYIGZ-UHFFFAOYSA-N | C1=CC2=CC(=CC(=C2C(=C1)N)S(O)(=O)=O                                                      |
| 338 | 0. 933 | 209. 02934 | GALACTARATE                                                                                                                               | [M-H] <sup>-</sup> | 209. 03    | C6H10O8     | Glucuronic acid derivatives                                                | DSLZVSRJTYRBFB-UHFFFAOYSA-N | O=C(O)C(O)C(O)C(O)C(O)C(=O)O                                                             |
| 339 | 0. 934 | 400. 14264 | 9-[[3-methyl-3-[(4-methyl-5-oxo-2H-furan-2-yl)methyl]oxiran-2-yl)methoxyl]furo[3, 2-g]chromen-7-one                                       | [M+H] <sup>+</sup> | 400. 13907 | C21H18O7    | Psoralens                                                                  | C1SFAPDYRQPRCZ-UHFFFAOYSA-N | O=C1OC2=C(OC(C3OC3(C)CC4OC(=O)C(=C4)C)C=5OC=CC5C=C2C=C1                                  |
| 340 | 0. 935 | 573. 1394  | methyl 8, 11, 15, 20, 22-pentahydroxy-24-methyl-13, 18, 27-trioxo-6-oxahentacyclo[15. 10. 2. 02. 22. 02. 22. 02. 22. 02. 22]nonacosane    | [M+H] <sup>+</sup> | 573. 13916 | C31H24O11   | Xanthones                                                                  | K1WTYJVARRBPR-UHFFFAOYSA-N  | O=C1C=2C(O)=C3C(=CC2OC4(C(=O)OC)C1=C(O)CC4O)CC56C=CC3(C(=O)C6=C(O)C=C7C(O)=CC(=CC7C5=O)C |
| 341 | 0. 935 | 351. 08566 | Pinastic acid                                                                                                                             | [M-H] <sup>-</sup> | 351. 086   | C20H16O6    | Anisoles                                                                   | KXQKSBAQMGQSN-FBMGVBCBSA-N  | O=C1OC(C(O)=C1C=2C=CC(OC)=CC2)C(C(=O)OC)C=C3C=CC=CC3                                     |
| 342 | 0. 936 | 202. 06985 | 2-((2H-pyrazolo[3, 4-d]pyrimidin-4-yl)amino)ethanol                                                                                       | [M+H] <sup>+</sup> | 202. 07001 | C7H9N5O     | Pyrazolo[3, 4-d]pyrimidines                                                | LCOTUPXIQXPIPA-UHFFFAOYSA-N | OCCNC1=NC=NC=C2N1C=C2                                                                    |

[illegible]

|     |       |           |                                                                                                                                           |                    |           |                             |                                   |                             |                                                                                       |
|-----|-------|-----------|-------------------------------------------------------------------------------------------------------------------------------------------|--------------------|-----------|-----------------------------|-----------------------------------|-----------------------------|---------------------------------------------------------------------------------------|
| 386 | 0.968 | 258.1091  | sn-Glycero-3-phosphocholine                                                                                                               | [M] <sup>+</sup>   | 258.10956 | C8H21N06P                   | Glycerophosphocholines            | SUHQVVVLYNQK-MRVFVSSYA-O    | C[N+](C)(C)CCOP(O)=O)OC[C-H](O)CO                                                     |
| 387 | 0.969 | 388.14377 | methyl 3-(4-hydroxyphenyl)-2-[(4-hydroxyphenyl)methyl]-4-methoxy-5-oxofuran-2-carboxylate                                                 | [M+H] <sup>+</sup> | 388.13907 | C20H18O7                    | Fatty acid esters                 | DYMDWEI1IXYN-UHFFFAOYSA-N   | O=C1OC(C=O)OC(C(C=2C=CC(=O)C2)=C1OC-CC3=CC=C(O)C=C3                                   |
| 388 | 0.97  | 80.04919  | Pyridine                                                                                                                                  | [M+H] <sup>+</sup> | 80.04948  | C5H5N                       | Pyridines and derivatives         | JUJWRO01HBZHM-UHFFFAOYSA-N  | C1=CC=NC=C1                                                                           |
| 389 | 0.971 | 212.05444 | Imidacloprid-urea                                                                                                                         | [M+H] <sup>+</sup> | 212.05852 | C9H10ClN3O                  | 2-halopyridines                   | ADWTYURAFSWSU-UHFFFAOYSA-N  | OC1=NCCN1C1=CN=C(C1)C=C1                                                              |
| 390 | 0.974 | 367.06216 | Dracorhodin perchlorate                                                                                                                   | [M+H] <sup>+</sup> | 367.06    | C17H15ClO7                  | 5-O-methylated Flavonoids         | KRTYZFUODYMZG-UHFFFAOYSA-N  | [O-]([C1+3]([O-])([O-])([O-])1O-1,OC=1C=C2([O-])1=C(C=C2C=CC(C(C2)C1)C=C3C=CC=CC3     |
| 391 | 0.975 | 649.21802 | (S)-2-((((S)-7-acetamido-1,2,3-trimethoxy-9-oxo-5,6,7,9-tetrahydrobenzo[ah]n[1,2-b:4,5-b']oxazol-10-yl)amino)-N-(benzo[d]thiazol-2-yl)-4- | [M+H] <sup>+</sup> | 649.21997 | C38H36N4O6S2                | Methionine and derivatives        | RU1FGEPTYTTFK-DHLKGQNSA-N   | O=C1C=C2C=C(C=C1C=C(C(=O)N)C3=NC=4C=CC=C4S)CCSC)C5=C(O)C(C)C(OC)=C(OC)C=C5COC2NC(=O)C |
| 392 | 0.976 | 282.08313 | Guanosine (Not validated)                                                                                                                 | [M-H] <sup>-</sup> | 282.0834  | C10H13N5O5                  | Nucleosides                       | NHYBQMYSK1UIF-UHFFFAOYNA-N  | O=C3C(=NC1=C3(=N)C1C2OC(CO)C(C)C2(O))N                                                |
| 393 | 0.977 | 300.0481  | 2-Chloroadenosine                                                                                                                         | [M-H] <sup>-</sup> | 300.05051 | C10H12ClN5O4                | Purine nucleosides                | B1XYZ1J1J1XVW-UHFFFAOYNA-N  | C1C=1N=C(N)C=2N=C(C2N1)C3OC(CO)C(O)C3O                                                |
| 394 | 0.977 | 214.03406 | 3-Chlorotyrosine                                                                                                                          | [M-H] <sup>-</sup> | 214.02765 | C9H10ClN3O3                 | Tyrosine and derivatives          | ACWBAGYTKWBCD-UHFFFAOYNA-N  | O=C(O)C(N)CC1=CC=C(O)C(C1)=C1                                                         |
| 395 | 0.977 | 218.10289 | Pesticide4 Pymetrozine, C10H11N5O, (E)-4,5-Dihydro-6-methyl-4-[(3-pyridinylmethylene)amino]-1,2,4-triazin-3(2H)-one                       | [M+H] <sup>+</sup> | 218.103   | C10H11N5O                   | 1,2,4-triazines                   | QHMTXANCGJZRX-WUXMJOGZSA-N  | OC1=NN=C(C)CN1N=CC=CC=NC=CC2                                                          |
| 396 | 0.977 | 292.07083 | PFSM-ammonio                                                                                                                              | [M-H] <sup>-</sup> | 292.07101 | [C8H16F3N2O4S] <sup>+</sup> | PFSA                              | ODUULAMNNKMD-UHFFFAOYSA-O   | O=C(O)C([N+](C)C)CCN3(=O)C(=O)C(F)F                                                   |
| 397 | 0.98  | 332.15433 | Deoxysappanone B 7,3'-Dimethyl Ether                                                                                                      | [M+H] <sup>+</sup> | 332.14923 | C18H18O5                    | Homoisoflavanones                 | OFAYBXSZCUARK-UHFFFAOYSA-N  | O=C1C2=CC=C(OC)C=C2OCC1C3=CC=C(O)C(OC)=C3                                             |
| 398 | 0.981 | 343.12183 | 2-alpha-Mannobiose                                                                                                                        | [M+H] <sup>+</sup> | 343.12347 | C12H22O11                   | O-glycosyl compounds              | HTWPGMGAMJNRG-UHFFFAOYNA-N  | OC1OC(O)C(OC2OC(CO)C(C)C2O)C(CO)C1O                                                   |
| 399 | 0.986 | 395.05588 | bisdethiobis(methylthio)gliotoxin                                                                                                         | [M+H] <sup>+</sup> | 395.0564  | C15H20N2O4S2                | Alpha amino acids and derivatives | OVRBAGMLZLXSBN-UOVKNHLSA-N  | O=C1N(C)C(SC)C(C=O)N2C3C(=CC=CC3)C12SC)CO                                             |
| 400 | 0.986 | 325.11331 | Disaccharide (Hex-Hex)                                                                                                                    | [M+H] <sup>+</sup> | 325.11371 | C12H22O11                   | Sugars                            | PVXPJ1JGRGXGY-UHFFFAOYNA-N  | OC2OC(OC1OC(O)C(CO)C1(O)C(O)C(O)C2(O)                                                 |
| 401 | 0.986 | 505.17514 | Raffinose                                                                                                                                 | [M+H] <sup>+</sup> | 505.1763  | C18H32O16                   | Oligosaccharides                  | MUPFEKTMRGPLJ-UHFFFAOYNA-N  | OC1OC(OC2OC(OC3(OC(CO)C(CO)C3O)C(CO)C2O)C(CO)C1O                                      |
| 402 | 0.988 | 277.17801 | NP1EC (TENTATIVE)                                                                                                                         | [M-H] <sup>-</sup> | 277.18091 | C17H26O3                    | Phenoxyacetic acid derivatives    | N1SAHDHKGWBEM-UHFFFAOYSA-N  | CCCCCCCCC1=CC=C(C=C1)OCC(=O)C                                                         |
| 403 | 0.989 | 249.03647 | Diphenyl phosphate                                                                                                                        | [M-H] <sup>-</sup> | 249.03223 | C12H11O4P                   | Aryl phosphodieters               | ASMOGLCHMWQK-UHFFFAOYSA-N   | C1=CC=C(C=C1)OP(O)C(=O)C2=CC=CC=C2                                                    |
| 404 | 0.99  | 227.07306 | 4-methoxy-9H-xanthen-9-one                                                                                                                | [M+H] <sup>+</sup> | 227.071   | C14H10O3                    | Xanthenes                         | SYEHMRXODULBY-UHFFFAOYSA-N  | O=C1C=C2C=C(CC2OC=3C(OC)=CC=CC13                                                      |
| 405 | 0.99  | 319.04898 | Flavanone base + 60                                                                                                                       | [M-H] <sup>-</sup> | 319.0459  | C15H12O8                    | Flavanone O-glycosides            | KJXSIXMJHKAJOD-UHFFFAOYNA-N | O=C2C3=C(O)C=C(O)C3(OC(C1=CC(O)C(O)C1)=C1)C2(O))                                      |
| 406 | 0.991 | 148.02434 | 3-Hydroxyaspartic acid                                                                                                                    | [M-H] <sup>-</sup> | 148.02515 | C4H7NO5                     | Aspartic acid and derivatives     | YYLQUHNPNCGKJQ-UHFFFAOYNA-N | O=C(O)C(O)C(C)=O                                                                      |
| 407 | 0.991 | 263.01627 | 4:2 Fluorotelomer alcohol                                                                                                                 | [M-H] <sup>-</sup> | 263.01239 | C6H5F9O                     | PFSA                              | JCMNMOBHVONLD-UHFFFAOYSA-N  | FC(F)(F)C(F)C(F)C(F)C(F)C(F)CO                                                        |
| 408 | 0.991 | 305.13574 | 5,9-dihydroxy-7-(hydroxymethyl)-5,7-dimethyl-4,5a,6,8,8a,9-hexahydro-1H-azuleno[5,6-c]furan-3-one                                         | [M+H] <sup>+</sup> | 305.13593 | C15H22O5                    | Terpene lactones                  | DBK1EMOKQWYZO-UHFFFAOYSA-N  | O=C1OC2=C1CC(O)C(C)C3CC(C)(CO)CC3C2O                                                  |
| 409 | 0.992 | 177.09456 | Canavanine                                                                                                                                | [M+H] <sup>+</sup> | 177.09821 | C5H12N4O3                   | L-alpha-amino acids               | FSB1GDSMBEYOFN-VKHMVHEASA-N | O=C(O)C(N)CCON(=O)N                                                                   |
| 410 | 0.994 | 306.1171  | 2-methyl-3-[(2S,3R,4S,5S,6R)-3,4,5-trihydroxy-6-(hydroxymethyl)oxan-2-yl]oxopropan-4-one                                                  | [M+H] <sup>+</sup> | 306.11835 | C12H16O8                    | O-glycosyl compounds              | YGS1RXHFAPUEJG-GPTQWHSKA-N  | O=C1C=CC(C=C1OC2OC(CO)C(O)C2O)C                                                       |
| 411 | 0.994 | 275.01581 | 6-PHOSPHOGLUCONIC ACID                                                                                                                    | [M-H] <sup>-</sup> | 275.017   | C6H13O10P                   | Monosaccharide phosphates         | BRISGZKFKLSJQ-UHFFFAOYSA-N  | O=C(O)C(C)C(O)C(C)C(O)COP(=O)(O)O                                                     |
| 412 | 0.994 | 199.96814 | Cysteine S-sulfate                                                                                                                        | [M-H] <sup>-</sup> | 199.96928 | C3H7NO5S2                   | S-sulfo-L-cysteines               | NOKPB1JYHPHWAN-REOHLBLSA-N  | [N-](C)C(SS(O)=O)C(O)C=O                                                              |
| 413 | 0.995 | 323.0274  | URIDINE-5-MONOPHOSPHATE                                                                                                                   | [M-H] <sup>-</sup> | 323.02802 | C9H13N2O9P                  | Pyrimidine ribonucleoside         | D1JCFXVJDGTHFX-UHFFFAOYSA-N | O=C1C=CN(C(=O)N1)C2OC(COP(=O)(O)O)C(CO)C2O                                            |
| 414 | 0.996 | 333.05783 | (2S,3S)-3,5,7-trihydroxy-6-methyl-2-(3,4,5-trihydroxyphenyl)-2,3-dihydrochromen-4-one                                                     | [M-H] <sup>-</sup> | 333.06158 | C16H14O8                    | Epigallocatechins                 | NZRL0DDQFPZTPM-CVEARBZSA-N  | O=C1C2=C(O)C=C(O)C=C2OC(C3=CC(O)C(O)C3)=C1O(C)=C3)C1O(C                               |
| 415 | 0.996 | 553.11426 | Biflavonoid-flavone base + 30 and flavanone base + 20 + 1MeO                                                                              | [M-H] <sup>-</sup> | 553.11218 | C31H22O10                   | Biflavonoids                      | XMFL1YCNQLOLA-CYLJNIGPNA-N  | O=C1C=C(OC2=C1C(O)=CC(O)C(CO)C3O)=C(O)C=C2OC4=CC(O)C4OC=5C(C(=O)C4)C6=CC=C(C(=O)C6=C6 |
| 416 | 0.997 | 167.99599 | Cysteic Acid                                                                                                                              | [M-H] <sup>-</sup> | 167.99722 | C3H7NO5S                    | Alpha amino acids                 | XVOYSCVBGLYSOL-UHFFFAOYNA-N | O=C(O)C(N)CS(=O)C(=O)O                                                                |
| 417 | 0.997 | 413.10254 | Deacetylasperulosidic acid                                                                                                                | [M+H] <sup>+</sup> | 413.10001 | C16H22O11                   | Iridoid O-glycosides              | ZYXWFTVHEWJOU-YYGDFGFSNA-N  | O=C(O)C1=CC(OC2OC(CO)C(O)C2O)C2OC(=CC(O)C13)CO                                        |
| 418 | 0.997 | 317.0563  | Myricetin                                                                                                                                 | [M-H] <sup>-</sup> | 317.05789 | C15H10O8                    | Flavonols                         | IKMDFBPZJNCSN-UHFFFAOYSA-N  | O=C1C(O)=C(OC=2C=C(O)C=C(O)C12)C=3C=C(O)C(O)=C(O)C3                                   |
| 419 | 0.998 | 171.00551 | Glycerophosphate(2)                                                                                                                       | [M-H] <sup>-</sup> | 171.00639 | C3H9O6P                     | Glycerophosphates                 | AVUCVROLDV1AJX-GSVOUTGSA-N  | OC[C-H](O)COP(O)(O)=O                                                                 |
| 420 | 0.999 | 233.0287  | (2R)-5-methoxy-2-methyl-2,3,8,9-tetrahydrofuro[2,3-h]chromen-4-one                                                                        | [M-H] <sup>-</sup> | 233.02577 | C13H14O4                    | Chromones                         | BCRDBKZKSRLMH-SSDOT75WSA-N  | O=C1C2=C(OC)C=C3OCC3=C2OC(C)C1                                                        |
| 421 | 0.999 | 192.08609 | Shikimic Acid                                                                                                                             | [M+H] <sup>+</sup> | 192.08664 | C7H10O5                     | Shikimic acids and derivatives    | JXOHHGKNMLTUB-HSUXUTPPSA-N  | O=C(O)C1=CC(O)C(O)C(CO)C1                                                             |
| 422 | 1.002 | 259.02078 | D-Mannose-6-phosphate                                                                                                                     | [M-H] <sup>-</sup> | 259.02243 | C6H13O9P                    | Hexose phosphates                 | NBSCHQZLSJFNG-QTVWNMPRSA-N  | OC1O[C-H]COP(O)(O)=O)[C-H](O)[C-H](O)[C-H]1O                                          |
| 423 | 1.002 | 585.14142 | Neomangiferin                                                                                                                             | [M+H] <sup>+</sup> | 585.14001 | C25H28O16                   | Xanthenes                         | VUWGVXVRYBSGI-IRXABLMPSA-N  | O=C1C2=CC(OC3OC(CO)C(CO)C3O)=C(O)C=C2OC4=CC(O)C4OC=5C(C(=O)C4)C6=CC=C(C(=O)C6=C6      |
| 424 | 1.003 | 274.0907  | Pentose + Proline                                                                                                                         | [M+H] <sup>+</sup> | 274.0932  | C11H15N3O7                  | Amino acids                       | VMOJEEZNLOLYBG-UHFFFAOYNA-N | O=C(O)C1N(C(=O)CC1)CC2(O)CC(CO)C(CO)C2(O)                                             |
| 425 | 1.003 | 273.02631 | Simonyellin                                                                                                                               | [M-H] <sup>-</sup> | 273.03    | C14H10O6                    | Isocoumarins and derivatives      | GJSCVPZGPZ1BMU-UHFFFAOYSA-N | O=C1OC=C2C(OC)=C(O)C(=O)C3=C2C1=C(O)C=C3C                                             |
| 426 | 1.005 | 183.08548 | D-Sorbitol                                                                                                                                | [M+H] <sup>+</sup> | 183.08632 | C6H14O6                     | Sugar alcohols                    | FBPPTZCFMRRESA-FBXPSONDNA-N | OC[C-H](O)[C-H](O)[C-H](O)[C-H](O)CO                                                  |
| 427 | 1.006 | 393.07874 | Hexose + C5H10O3, 1phosphate                                                                                                              | [M-H] <sup>-</sup> | 393.07819 | C11H23O13P                  | Organic acids                     | HJZBAIMJDQCPL-UHFFFAOYNA-N  | C(C1C(C(C(C(O1)OC(COP(=O)(O)O)C(CO)O)O)O)O)O)O                                        |
| 428 | 1.006 | 279.04669 | Piscidic Acid                                                                                                                             | [M+H] <sup>+</sup> | 279.04749 | C11H12O7                    | Phenylpropanoic acids             | TUODPMGCCJSJRH-UHFFFAOYSA-N | O=C(O)C(C)C(O)C(C(=O)O)CC1=CC=C(O)C=C1                                                |

|     |       |           |                                                                                                                                                                              |                    |           |                            |                                                                        |                              |                                                                                                       |
|-----|-------|-----------|------------------------------------------------------------------------------------------------------------------------------------------------------------------------------|--------------------|-----------|----------------------------|------------------------------------------------------------------------|------------------------------|-------------------------------------------------------------------------------------------------------|
| 429 | 1.007 | 241.01073 | 33FTA                                                                                                                                                                        | [M-H] <sup>-</sup> | 241.0105  | C6H5F7O2                   | Medium-chain fatty acids                                               | ISFSKSWQWIRDNC-UHFFFAOYSA-N  | OC(=O)CCC(F)(F)C(F)(F)C(F)(F)F                                                                        |
| 430 | 1.007 | 261.03696 | D-Sorbitol 6-phosphate                                                                                                                                                       | [M-H] <sup>-</sup> | 261.03809 | C6H15O9P                   | Monosaccharide phosphates                                              | GACTWZ2MVUMRG-SLPGGIOYSA-N   | OC[C@H](O)[C@H](O)[C@H](O)[C@H](O)COP(=O)(O)=O                                                        |
| 431 | 1.007 | 373.17044 | Phillygenin                                                                                                                                                                  | [M+H] <sup>+</sup> | 373.17001 | C21H24O6                   | Furanoid lignans                                                       | CPJKWDCUOOTEW-YJXPFGSGSA-N   | OC1=CC=C(C=C1OC)C2OC3C(OC23)C4=CC=C(OC)C(OC)=C4                                                       |
| 432 | 1.008 | 337.12189 | Pesticide6_Fenbuconazole_C19H17C1N4_4-(4-Chlorophenyl)-2-phenyl-2-((1H-1,2,4-triazol-1-ylmethyl)butanenitrile                                                                | [M+H] <sup>+</sup> | 337.121   | C19H17C1N4                 | Linear 1,3-diarylpropanoids                                            | RQD1ADAK1FFEKU-UHFFFAOYSA-N  | N#CC(C=C1=CC=CC1)(CN2N=CN=C2)CCC3=CC=C(C1)C=C3                                                        |
| 433 | 1.009 | 603.15314 | [(2R,3S,4S,5R,6S)-6-[2,3-dihydroxy-4-[(6)-3-(4-hydroxyphenyl)prop-2-enoyl]phenoxy]-3,4,5-trihydroxyoxan-2-yl]methyl (E)-3-(4-                                                | [M+H] <sup>+</sup> | 603.14728 | C30H28O12                  | Flavonoid O-glycosides                                                 | MXL1DYXRCRYPL-SVQBVAIGSA-N   | O=C(OC1OC(OC2=CC=C(C(=O)C=C3=CC=C(C(=O)C=C3)C(=O)=C2O)C(=O)C(=O)C1O)C=CC4=CC=C(O)C=C4                 |
| 434 | 1.009 | 123.05582 | 2-Acetylpyrazine                                                                                                                                                             | [M+H] <sup>+</sup> | 123.0553  | C6H6N2O                    | Aryl alkyl ketones                                                     | DBZAKQWXICEWN-UHFFFAOYSA-N   | CC(=O)c1cncn1                                                                                         |
| 435 | 1.009 | 229.01082 | D-RIBOSE 5-PHOSPHATE                                                                                                                                                         | [M-H] <sup>-</sup> | 229.011   | C5H11O8P                   | Pentose phosphates                                                     | PPQRONHOSHZGFQ-UHFFFAOYSA-N  | O=CC(O)C(O)C(O)COP(=O)(O)O                                                                            |
| 436 | 1.009 | 237.01511 | Methazolamide                                                                                                                                                                | [M+H] <sup>+</sup> | 237.013   | C5H8N4O3S2                 | Thiadiazole sulfonamides                                               | FLOSMHQXBMRNHR-UHFFFAOYSA-N  | O=C(N=C1SC(=NN1C)S(=O)(=O)N)C                                                                         |
| 437 | 1.011 | 207.01566 | 2-Naphthalene sulfonic acid                                                                                                                                                  | [M-H] <sup>-</sup> | 207.01215 | C10H8O3S                   | 2-naphthalene sulfonates                                               | KVBGVZZKJNLXJU-UHFFFAOYSA-N  | C1=CC=C2C=C(C(=CC2=C1)S(=O)(=O)=O                                                                     |
| 438 | 1.011 | 241.03622 | 4,6,8-trihydroxy-7-methoxy-3-methyl-3,4-dihydroisochromen-1-one                                                                                                              | [M+H] <sup>+</sup> | 241.03632 | C11H12O6                   | Hydroxybenzoic acid derivatives                                        | ZLLQKQ1TRWKTU-UHFFFAOYSA-N   | O=C1OC(C)C(O)C2=C(C(=O)C)=C(OC)C(O)=C12                                                               |
| 439 | 1.011 | 218.06564 | O-Succinylhomoserine                                                                                                                                                         | [M-H] <sup>-</sup> | 218.06702 | C8H13NO6                   | L-alpha-amino acids                                                    | GNISQJGXJDKDJ-UHFFFAOYNA-N   | O=C(O)CCC(=O)OCCC(N)C(=O)O                                                                            |
| 440 | 1.011 | 275.04526 | Ursinoic Acid                                                                                                                                                                | [M-H] <sup>-</sup> | 275.04794 | C15H16O5                   | 2,2-dimethyl-1-benzoyltrans                                            | XUXBOSSCMLZGTA-UHFFFAOYSA-N  | O=C(O)CC(=O)C1=CC=C(OC)C2=CC=CC(OC21)C(C                                                              |
| 441 | 1.014 | 765.20166 | 5-hydroxy-3-[(2S,3R,4R,5S)-3-hydroxy-5-(hydroxymethyl)-4-[(2S,3R,4S,5S,6R)-3,4,5-trihydroxy-6-(hydroxymethyl)oxan-2-yl]oxy]-6-(hydroxymethyl)tetrahydro-2H-pyran-3,4,5-triol | [M+H] <sup>+</sup> | 765.20203 | C32H38O19                  | Flavonoid 7-O glycosides                                               | LKV1DBLGZHMPCV-HLAATANNSA-N  | O=C1C(OC2OC(CO)C(OC3OC(CO)C(O)C(O)C3O)C2O)=C(OC4=CC(OC5OC(C)C(O)C(O)C5O)=CC(O)=C14)C=6C=CC(O)=C6      |
| 442 | 1.014 | 329.00366 | Furosenide                                                                                                                                                                   | [M-H] <sup>-</sup> | 329.00046 | C12H11ClN2O5S              | Aminobenzenesulfonamides                                               | ZZUPCTLCJWQSV-UHFFFAOYSA-N   | C=1C-C(CNC2=CC(=C(C=C2C(=O)O)S(N)(=O)=O)Cl)OC1                                                        |
| 443 | 1.016 | 173.02065 | sn-Glycerol 3-phosphate                                                                                                                                                      | [M+H] <sup>+</sup> | 173.02095 | C3H9O6P                    | Glycerophosphates                                                      | AVUCVRLDVIAXJ-GSVOUGTGS-N    | OC[C@H](O)COP(=O)(O)O                                                                                 |
| 444 | 1.018 | 236.11203 | N-(9-oxodecyl)acetamide                                                                                                                                                      | [M+H] <sup>+</sup> | 236.11226 | C12H23NO2                  | Acetamides                                                             | JRJBWJJIQGLDP-UHFFFAOYSA-N   | O=C(C)CCCCCCCNC(=O)C                                                                                  |
| 445 | 1.018 | 257.00549 | PPCA-H                                                                                                                                                                       | [M-H] <sup>-</sup> | 257.0054  | C6H5F7O3                   | PFSA                                                                   | NYXWTWRATMQVGT-UHFFFAOYSA-N  | O=C(O)C(=O)C(F)(F)C(F)(F)C(F)(F)F                                                                     |
| 446 | 1.019 | 94.98025  | Methanesulfonate                                                                                                                                                             | [M-H] <sup>-</sup> | 94.98083  | CH4O3S                     | Organosulfonic acids                                                   | AFVFIQVMOAPDHO-UHFFFAOYSA-N  | CS(=O)(=O)=O                                                                                          |
| 447 | 1.02  | 407.16507 | (2R,3R,4S,6R)-2-((5-hydroxy-2,2-dimethyl-3,4-dihydro-2H-benzo[h]chromen-6-yl)oxy)-6-(hydroxymethyl)tetrahydro-2H-pyran-3,4,5-triol                                           | [M+H] <sup>+</sup> | 407.16599 | C21H26O8                   | Phenolic glycosides                                                    | WVILKFLAZPSRT-MEUAUJKLSA-N   | OC1=C(OC2OC(CO)C(O)C(O)C2O)C3=CC=CC3C=4OC(C)C(OC)CC14                                                 |
| 448 | 1.02  | 183.00534 | 2,4-Dinitrophenol                                                                                                                                                            | [M-H] <sup>-</sup> | 183.00475 | C6H4N2O5                   | Dinitrophenols                                                         | UFBJCMHMOXMKC-UHFFFAOYSA-N   | C1=CC(=C(C=C1N(=O)=O)N(=O)=O)O                                                                        |
| 449 | 1.02  | 218.03207 | Ornidazole                                                                                                                                                                   | [M-H] <sup>-</sup> | 218.0338  | C7H10ClN3O3                | Nitroimidazoles                                                        | IPWKIXLWTCNBKN-UHFFFAOYNA-N  | O=N(=O)C1=CN=C(N1CC(=O)CC1)C                                                                          |
| 450 | 1.021 | 329.00134 | iodinated analogue of makaluvone                                                                                                                                             | [M+H] <sup>+</sup> | 329       | [C11H10IN2O2] <sup>+</sup> | Pyrolo[4,3,2-de]nolines                                                | NXSZMSHNYDJLD-UHFFFAOYSA-O   | O=C1C(=O)C2=C3C(=CN2C)CC[NH2-]C3=C11                                                                  |
| 451 | 1.021 | 140.99435 | Phosphonoacetic acid                                                                                                                                                         | [M+H] <sup>+</sup> | 140.99474 | C2H5O5P                    | Organic phosphonic acids                                               | NWJLQHKOGNDPB-UHFFFAOYSA-N   | O=C(O)CP(=O)(O)O                                                                                      |
| 452 | 1.023 | 239.03094 | Sphondin                                                                                                                                                                     | [M+H] <sup>+</sup> | 239.03046 | C12H8O4                    | Angular furanocoumarins                                                | DLJCNIRLOSJKQW-UHFFFAOYSA-N  | O=C1OC=2C(C=C1)=CC(OC)=C3OC=CC32                                                                      |
| 453 | 1.027 | 338.98691 | "FRUCTOSE 1,6-BIPHOSPHATE"                                                                                                                                                   | [M-H] <sup>-</sup> | 338.98801 | C6H14O12P2                 | Hexose phosphates                                                      | XPYBS1WDXQFNMH-UYFOZJQFSA-N  | O=C(COP(=O)(O)C(O)C(O)C(O)COP(=O)(O)O                                                                 |
| 454 | 1.031 | 277.05878 | 3-(5,7-dimethoxy-4-oxochromen-2-yl)propanoic acid                                                                                                                            | [M-H] <sup>-</sup> | 277.0603  | C14H14O6                   | Chromones                                                              | AKJLPZYHXYQVJT-UHFFFAOYSA-N  | O=C(O)CCC=1OC2=CC(OC)=CC(OC)=C2C(=O)C1                                                                |
| 455 | 1.033 | 319.04214 | Disulfiram                                                                                                                                                                   | [M+H] <sup>+</sup> | 319.04099 | C10H20N2S4                 | Thiuram disulfides                                                     | AUZONCFQVSMFAP-UHFFFAOYSA-N  | S=C(SSC(=S)N(C)CC)N(C)CC                                                                              |
| 456 | 1.033 | 233.04124 | Quebrachitol                                                                                                                                                                 | [M+H] <sup>+</sup> | 233.04219 | C7H14O6                    | Cyclohexanols                                                          | DSCPFYEQKRSV-UHFFFAOYSA-N    | OC1C(O)C(O)C(OC)C(O)C1O                                                                               |
| 457 | 1.035 | 608.08636 | Uridine-5-diphosphoacetylgalactosamine                                                                                                                                       | [M+H] <sup>+</sup> | 608.08887 | C17H27N3O17P2              | Pyrimidine nucleotide sugars                                           | LFTYTUAZOPRMMI-UHFFFAOYNA-N  | O=C1N=C(O)C=CN1C2OC(COP(=O)(O)OP(=O)(O)OC3OC(CO)C(O)C(=O)C3N=C(O)C(=O)C2O                             |
| 458 | 1.036 | 535.03558 | UDP-xylose                                                                                                                                                                   | [M-H] <sup>-</sup> | 535.03717 | C14H22N2O16P2              | Pyrimidine ribonucleoside                                              | DQQDLYVHOTLR-OCIMBMBZSA-N    | O[C@H]1[C@H](COP(=O)(=O)OP(=O)(=O)O[C@H]2OC[C@H](O)[C@H](O)[C@H]2O)O[C@H](C(=O)C(=O)N1C)C(=O)C(=O)C2O |
| 459 | 1.039 | 166.97424 | PHOSPHO(ENOL)PYRUVIC ACID                                                                                                                                                    | [M-H] <sup>-</sup> | 166.97501 | C3H5O6P                    | Phosphate esters                                                       | DTBNBXWJWCWCIK-UHFFFAOYSA-N  | O=C(O)C(OP(=O)(O)O)O=C                                                                                |
| 460 | 1.04  | 463.04724 | 4-Hydroxyglucobrassicin                                                                                                                                                      | [M-H] <sup>-</sup> | 463.04868 | C16H20N2O10S2              | Alkylglucosinolates                                                    | CSMYCLLIHFFFLG-UHFFFAOYNA-N  | O=S(=O)(O)ON=C(SC1OC(C)C(O)C1O)CC2=CNC=3C=CC=C(O)C2                                                   |
| 461 | 1.045 | 585.13806 | 7-[(2S,3R,4R,5R,6S)-3,4,5-trihydroxy-6-methylxan-2-yl]oxy-3-[4-[(2S,3R,4R,5R,6S)-3,4,5-trihydroxy-6-methylxan-2-yl]oxyphenyl]chromen-4-                                      | [M+H] <sup>+</sup> | 585.1369  | C27H30O12                  | Isoflavonoid O-glycosides                                              | RIXHO1PNPVCBZ-WIYOTWCASA-N   | O=C1C(=COC2C(OC3OC(CO)C(O)C3O)=CC(=C12)C=4C=CC(OC5OC(C)C(O)C(O)C5O)=CC4                               |
| 462 | 1.045 | 203.14989 | Asymmetric dimethylarginine                                                                                                                                                  | [M+H] <sup>+</sup> | 203.15025 | C8H18N4O2                  | Arginine and derivatives                                               | YDGMGEXADEMOP-LURJTMIESA-N   | CN(C)C(=N)NCCC[C@H](C(=O)O)N                                                                          |
| 463 | 1.045 | 412.96481 | Perfluorooctanoic acid                                                                                                                                                       | [M-H] <sup>-</sup> | 412.96643 | C8HF15O2                   | Perfluoroalkyl carboxylic acid and Glucosinolate breakdown metabolites | SNRGREZHAYWORS-UHFFFAOYSA-N  | C(C(C(C(C(C(C(F)(F)F)(F)F)(F)F)(F)F)(F)F)(F)F)F)F(=O)O                                                |
| 464 | 1.046 | 176.01884 | 1-Isothiocyanato-4-(methylsulfinyl)-butane                                                                                                                                   | [M-H] <sup>-</sup> | 176.02094 | C6H11NO52                  |                                                                        | SUVMBJBUFCVSAD-UHFFFAOYNA-N  | CS(=O)CCCCN=C=S                                                                                       |
| 465 | 1.047 | 517.01044 | 2-(3,4-dihydroxyphenyl)-5,8-dihydroxy-7-methoxy-3-[(2S,3R,4R,5R,6S)-3,4,5-trihydroxy-6-methylxan-2-yl]oxychromen-4-one                                                       | [M+H] <sup>+</sup> | 517.01416 | C22H22O12                  | Flavonoid-3-O-glycosides                                               | PTUBUBVQXWVPI-QJCKQCTOSA-N   | O=C1C(OC2OC(C)C(O)C2O)=C(OC3=C(C(OC)=CC(O)=C13)C=4C=CC(OC5OC(C)C(O)C(O)C5O)=CC4                       |
| 466 | 1.047 | 259.02002 | Carbamazepine                                                                                                                                                                | [M+H] <sup>+</sup> | 259.0192  | C15H12N2O                  | Dibenzazepines                                                         | FTGPTBGLSHEPO-UHFFFAOYSA-N   | N=C(O)N1C=2C=CC=CC2C=CC=3C=CC=CC31                                                                    |
| 467 | 1.048 | 266.9931  | Dichlorophen                                                                                                                                                                 | [M-H] <sup>-</sup> | 266.9985  | C13H10Cl2O2                | Diphenylmethanes                                                       | MDNWOSDZYLHTCG-UHFFFAOYSA-N  | C=1C=C(C(=CC2=CC(=C(C=O)C1)=CC1C1)O                                                                   |
| 468 | 1.05  | 149.02304 | Phthalic anhydride                                                                                                                                                           | [M+H] <sup>+</sup> | 149.02332 | C8H4O3                     | Phthalic anhydrides                                                    | LGRFSURHDFAJT-UHFFFAOYSA-N   | O=C1OC(=O)C2=CC=CC=C12                                                                                |
| 469 | 1.05  | 189.1597  | Propamocarb                                                                                                                                                                  | [M+H] <sup>+</sup> | 189.15976 | C9H20N2O2                  | Carbamate esters                                                       | WZZLXDUDQPOXNW-UHFFFAOYSA-N  | CCCOC(=O)NCCN(C)C                                                                                     |
| 470 | 1.05  | 325.04221 | Uridine 5'-monophosphate                                                                                                                                                     | [M+H] <sup>+</sup> | 325.04315 | C9H13N2O9P                 | Pyrimidine ribonucleoside                                              | DJJCXFPVJDGTHFX-UHFFFAOYNA-N | O=C1N=C(O)C=CN1C2OC(COP(=O)(O)O)C(O)C2O                                                               |
| 471 | 1.052 | 146.11703 | Acetylcholine                                                                                                                                                                | [M+H] <sup>+</sup> | 146.117   | C7H16NO2                   | Acyl choline                                                           | O1PILFWKSMYRGL-UHFFFAOYSA-N  | CC(=O)OCC[N+](C)(C)C                                                                                  |

|     |       |           |                                                                                                                                 |                    |           |               |                                           |                             |                                                                                                                   |
|-----|-------|-----------|---------------------------------------------------------------------------------------------------------------------------------|--------------------|-----------|---------------|-------------------------------------------|-----------------------------|-------------------------------------------------------------------------------------------------------------------|
| 472 | 1.053 | 357.02502 | (E)-1,4-bis(4-hydroxy-3-methoxyphenyl)-2,3-dimethylbut-2-ene-1,4-dione                                                          | [M+H] <sup>+</sup> | 357.02454 | C20H20O6      | Lignans, neolignans and related compounds | ZTNYRNGTBAGY1Z-VAWXSNFSA-N  | O=C(C1=CC=C(C(=O)(C(C)=O)C1)C(=C(C(=O)C2=CC=C(C(=O)C)=C2)C)C                                                      |
| 473 | 1.053 | 225.01572 | Xanthotoxol                                                                                                                     | [M+H] <sup>+</sup> | 225.01601 | C11H6O4       | 8-hydroxy psoralens                       | JWVYQGERKEAHW-UHFFFAOYSA-N  | O=C1OC2=C(O)C=CC3=C2C=C=C1                                                                                        |
| 474 | 1.074 | 398.07434 | Dysidin                                                                                                                         | [M+H] <sup>+</sup> | 398.069   | C16H22C13N04  | N-substituted carboxylic acid imides      | PXUALOWHEOKSO-SOXOQJGTS-N   | O=C(C=C(C(OC)CC(C)C(C1)C1)C1)N1C(=O)C=C(OC)C1C(C)C                                                                |
| 475 | 1.083 | 405.00891 | Uridine 5'-diphosphate                                                                                                          | [M+H] <sup>+</sup> | 405.00946 | C9H14N2O12P2  | Pyrimidine ribonucleoside                 | XOCTY1AWTASQJW-XVCMESISA-N  | O[C=H]1[C=H](COP(=O)(=O)OP(=O)(O)=O[C=H](1C=H)O)N1C=C(C(=O)=N)C=O                                                 |
| 476 | 1.086 | 307.04114 | Techochrysin                                                                                                                    | [M+H] <sup>+</sup> | 307.04001 | C16H12O4      | 7-O-methylated flavonoids                 | IRZVHDLBAYNPT-UHFFFAOYSA-N  | O=C1C=C(OC)C2=C(C(OC)C=C(C1)C2)C3=C(C=C)C=C3                                                                      |
| 477 | 1.086 | 565.04608 | UDP-D-glucose                                                                                                                   | [M+H] <sup>+</sup> | 565.04773 | C15H24N2O17P2 | Pyrimidine nucleotide sugars              | HSCJRCJZDFQWQP-JZMIEXBBSA-N | OC[C@H]1O[C@H](OP(=O)(=O)OP(=O)(=O)OC[C@H]2O[C@H](1C=H)(C(=O)N2)N2P(=CC(=O)C(=O)N2)=O)[C@H](O)[C@H](O)[C@H]1O     |
| 478 | 1.088 | 265.13943 | 9-hydroxy parthenolide                                                                                                          | [M+H] <sup>+</sup> | 265.14001 | C15H20O4      | Germaconolides and derivatives            | RZUCKARTVHQBW-CVZYAWFWSA-N  | O=C1OC2C3OC3(C)CCC=C(C)C(O)CC2C1=C                                                                                |
| 479 | 1.088 | 213.02667 | Juarezic Acid                                                                                                                   | [M+H] <sup>+</sup> | 213.03123 | C11H10O2      | Styrenes                                  | FE1QOMCWGDNMMH-KBXYBYNKSX-N | O=C(O)C=C=C=C1C=CC=C1                                                                                             |
| 480 | 1.092 | 185.03188 | Glutamine (L)                                                                                                                   | [M+H] <sup>+</sup> | 185.0323  | C5H10N2O3     | L-alpha-amino acids                       | ZDXPYRJPDNTRX-VKHMVHEASA-N  | O=C(O)C(N)CCC(=O)O                                                                                                |
| 481 | 1.094 | 113.05945 | 1,4-Cyclohexanedione                                                                                                            | [M+H] <sup>+</sup> | 113.0597  | C6H8O2        | Cyclic ketones                            | DCZFGQYXRKMVFG-UHFFFAOYSA-N | O=C1CCC(=O)CC1                                                                                                    |
| 482 | 1.095 | 606.07379 | Uridine 5'-diphospho-N-acetylglucosamine                                                                                        | [M+H] <sup>+</sup> | 606.07428 | C17H27N3O17P2 | Pyrimidine nucleotide sugars              | LFTYTUAZOPRMI-CFRASDGFSA-N  | CC(=O)N[C@H]1[C@H](OP(=O)(=O)OP(=O)(=O)OC[C@H]2O[C@H](1C=H)(C(=O)N2)N2P(=CC(=O)C(=O)N2)=O)[C@H](O)[C@H](O)[C@H]1O |
| 483 | 1.096 | 608.0863  | Uridine-5-diphosphoacetylglucosamine                                                                                            | [M+H] <sup>+</sup> | 608.08887 | C17H27N3O17P2 | Pyrimidine nucleotide sugars              | LFTYTUAZOPRMI-UHFFFAOYSA-N  | O=C1N=C(O)C=CN1C2OC(COP(=O)(=O)OP(=O)(=O)OC3OC(CO)C(C)C(=O)C3N=C(O)C(C)C(=O)C2O                                   |
| 484 | 1.1   | 413.09427 | 2-amino-5-[2-[[2,3-dihydroxy-2-(1-hydroxyethyl)butanoyl]oxymethyl]-4-hydroxyvanillinol]-5-oxononanoic acid                      | [M+H] <sup>+</sup> | 413.0943  | C18H26N2O9    | Glutamine and derivatives                 | JMRJLJQBHHWY1U-UHFFFAOYSA-N | O=C(O)C(N)CCC(=O)NC1=CC=C(C)C=C1OCC(=O)C(C)C(C)C(C)C(=O)C                                                         |
| 485 | 1.1   | 127.03925 | Dihydro-4,4-dimethyl-2,3-furandione                                                                                             | [M+H] <sup>+</sup> | 127.04007 | C6H8O3        | Gamma butyrolactones                      | HRTQFBQOIFEE-UHFFFAOYSA-N   | O=C1OCC(C1=O)C(C)C                                                                                                |
| 486 | 1.101 | 132.02939 | D-ASPARTATE                                                                                                                     | [M+H] <sup>+</sup> | 132.03    | C4H7N04       | Aspartic acid and derivatives             | CKLJMWTLIZZHCS-UHFFFAOYSA-N | O=C(O)CC(N)C(=O)O                                                                                                 |
| 487 | 1.102 | 356.08932 | Balsalazide                                                                                                                     | [M+H] <sup>+</sup> | 356.08881 | C17H15N3O6    | Beta amino acids and derivatives          | KONZQJABTUMFX-UHFFFAOYSA-N  | O=C(O)C1=CC(=NC2=CC=C(C=C2)C(=O)NCCC(=O)O)C=C1=O                                                                  |
| 488 | 1.105 | 422.1037  | (Z)-2-(2-methoxybenzylidene)-9-(pyridin-3-yl)-8,9-dihydro-2H-furo[2,3-f]chromene-3,7-dione                                      | [M+H] <sup>+</sup> | 422.10001 | C24H17N05     | Aurone flavonoids                         | FE1HRQSTXZRGQD-JA1QZGSSA-N  | O=C1OC2=CC(=C3C(=O)C(OC3=C2C(=C4C=CC(=O)C1)=CC(=O)C=C4)C5=CC=C(C)C=C5                                             |
| 489 | 1.105 | 164.09171 | N,N-dimethyl-7H-purin-6-amine                                                                                                   | [M+H] <sup>+</sup> | 164.09    | C7H9N5        | 6-alkylaminopurines                       | BV1AQMSVZHOJW-UHFFFAOYSA-N  | N1=CN=C(C=NC2=NC12)N(C)C                                                                                          |
| 490 | 1.106 | 189.1602  | "NEPSILON, NEPSILON, NEPSILON-TRIMETHYL LYSINE"                                                                                 | [M+H] <sup>+</sup> | 189.16    | C9H20N2O2     | Alpha amino acids                         | MXNRLFUSFKVQSK-UHFFFAOYSA-N | O=C([O-])C(N)CCCC[N+](C)(C)C(C)C                                                                                  |
| 491 | 1.106 | 291.11734 | 1,2-DIOL                                                                                                                        | [M+H] <sup>+</sup> | 291.12201 | C16H18O5      | Diphenylethers                            | W1OKWEJDRXNVSH-UHFFFAOYSA-N | OC=CC(C(OC)C=C(C1OC=CC(C=C(C(OC)C2O)C)C                                                                           |
| 492 | 1.106 | 723.19165 | dimethyl 3,3'-(2,5-dihydroxy-3,6-dioxocyclohexa-1,4-diene-1,4-diyl)bis(3-(3-methoxy-4-(2-methoxy-2-oxoethoxy)phenyl)propanoate) | [M+H] <sup>+</sup> | 723.19    | C34H36O16     | Dalbergiones                              | CH1GK1GFBZGFG-UHFFFAOYSA-N  | O=C(OC)CCC1=CC=C(C=C1OC)C(C=C2)C(=O)C(=O)C(C2O)C(C3=C(C(=O)C(OC)C(C(OC)=C3)C(C(=O)O)C)C(=O)O                      |
| 493 | 1.108 | 146.11807 | DEOXYCARNITINE                                                                                                                  | [M+H] <sup>+</sup> | 146.12    | C7H15N02      | Straight chain fatty acids                | JHPNVN1EXLNTX-UHFFFAOYSA-N  | O=C([O-])CCC[N+](C)(C)C(C)C                                                                                       |
| 494 | 1.108 | 382.08154 | Metsulfuron-methyl                                                                                                              | [M+H] <sup>+</sup> | 382.08157 | C14H15N5O6S   | Benzoic acid esters                       | RSMUVRMZCOLBH-UHFFFAOYSA-N  | COC(=O)C1=CC=C(C=C1S(=O)(=O)N=C(N)C1=CC=C(C)C(=O)N1C=CC(=O)C=C1S(=O)(=O)N=C(N)C1=CC=C(C)C(=O)N1                   |
| 495 | 1.108 | 139.05795 | Salicylic Acid                                                                                                                  | [M+H] <sup>+</sup> | 139.05215 | C2H6H4O9      | Medium-chain fatty acids                  | M1NDH1VHJZYEER-HBBSNRFSA-N  | O=C(O)CCCCCCCC(=O)C=C(C                                                                                           |

|     |       |           |                                                                                                                              |                      |           |               |                                   |                              |                                                                                                               |
|-----|-------|-----------|------------------------------------------------------------------------------------------------------------------------------|----------------------|-----------|---------------|-----------------------------------|------------------------------|---------------------------------------------------------------------------------------------------------------|
| 515 | 1.123 | 504.18906 | 1,1'-azanediylibis(3-methyl-2H-naphtho[1,2,3-de]quinoline-2,7(3H)-dione) triacetate                                          | [M+H] <sup>+</sup>   | 504.19    | C40H33N3O10   | Anthracenes                       | VVA1GFCJFBXWBL-UHFFFAOYSA-N  | O=C(O)C, O=C(O)C, O=C(O)C, O=C1C=2C=CC=CC2=C3C(NC=4C(=O)N(C=5C=CC=C6C(=O)C=7C=C(C=C7C4)C65)C1)C(=8C=C(C=C1)C8 |
| 516 | 1.123 | 251.05205 | Perseitol                                                                                                                    | [M+H] <sup>+</sup>   | 251.0528  | C7H1607       | Sugar alcohols                    | OXQKEKGBFMQTML-UHFFFAOYSA-N  | OC(C)(O)C(C)(O)C(C)(O)CO                                                                                      |
| 517 | 1.124 | 483.10959 | Parishin E                                                                                                                   | [M+H] <sup>+</sup>   | 483.10999 | C19H24013     | Phenolic glycosides               | XAIUTKLNZBMEG-UHFFFAOYSA-N   | O=C(O)CC(O)C(C(=O)O)CC(=O)OCC1=CC=C(C(=O)C(C)(O)C2=O)C=C1                                                     |
| 518 | 1.125 | 367.13229 | (3E,12E)-3,12-dimethyl-8-methylidene-6,18-dioxatricyclo[14.2.1.0 <sup>2,9</sup> ]nonadeca-3,12,16(19)-triene-7,17-dione      | [M+H] <sup>+</sup>   | 367.13062 | C20H2404      | Diterpene lactones                | KTYZXFERQUCPX-SPUCVAIDSA-N   | O=C1OC2C=C1CCC=C(C)CCC3(C=C(C)O)OC3=C(C)C2                                                                    |
| 519 | 1.125 | 305.08261 | 5,7-dimethoxy-2-phenyl-4H-chromen-4-one                                                                                      | [M+H] <sup>+</sup>   | 305.07999 | C17H1404      | 7-O-methylated flavonoids         | JRFZSUMZAHNSL-UHFFFAOYSA-N   | O=C1C=C(C(=C2=CC(O)C=CC(=C2)C=3C=CC=CC3                                                                       |
| 520 | 1.125 | 257.08453 | Flavan-3-ols + 30                                                                                                            | [M+H] <sup>+</sup>   | 257.082   | C15H1405      | Flavanol O-glycosides             | RSYUFYQIACJFML-DDOUPSRJNA-N  | OC1=CC=C(C=C1)C3OC=2C=C(O)C=C(O)C=2C3(O)                                                                      |
| 521 | 1.125 | 321.05811 | fuzhuanin A                                                                                                                  | [M+H] <sup>+</sup>   | 321.05899 | C15H1208      | 1-benzopyrans                     | QCFAYXITEXFSLB-QMTHXVAHSA-N  | O=C(O)C=1OC(=O)C=C(C1)C2OC=3C=C(O)C=C(O)C3CC2O                                                                |
| 522 | 1.125 | 616.20166 | JACAGLABROSIDE B                                                                                                             | [M+2H] <sup>2+</sup> | 616.20245 | C30H30013     | Saccharolipids                    | A1FVFGWRWAMEB-GSQIIVKLSA-N   | O=C1C=CC(O)C(C=C1)CC(=O)OC2OC(OC(=O)CC3(O)C=CC(=O)C=C3)C(OC(=O)C=C4C=CC=C4)C(C)C2O                            |
| 523 | 1.127 | 146.09229 | 4-Guanidinobutanoic acid                                                                                                     | [M+H] <sup>+</sup>   | 146.09239 | C5H11N302     | Gamma amino acids and derivatives | TUHVJAJIMEOSA-UHFFFAOYSA-N   | C(CC(=O)O)CNC(=N)N                                                                                            |
| 524 | 1.127 | 221.04111 | 4-hydroxy-3,5-dimethoxybenzoic acid                                                                                          | [M+Na] <sup>+</sup>  | 221.03999 | C9H1005       | Galic acid and derivatives        | JMSVCTVWECHDZ-UHFFFAOYSA-N   | O=C(O)C1=CC(OC)=C(O)C(OC)=C1                                                                                  |
| 525 | 1.128 | 445.1189  | baicalin                                                                                                                     | [M+H] <sup>+</sup>   | 445.12244 | C21H18011     | Flavonoid-7-O-glucuronides        | IKTI1ZLYTISPEN-ZFORQUDYSA-N  | O=C(O)C1OC(OC=2C=3OC(=CC(=O)C3=C(O)C2O)C=4C=CC=CC4)C(C)(O)C1O                                                 |
| 526 | 1.128 | 112.05007 | Cytosine                                                                                                                     | [M+H] <sup>+</sup>   | 112.05054 | C4H5N303      | Pyrimidones                       | OPTASPLRGRNAP-UHFFFAOYSA-N   | Clcnc([nH]c1=N)O                                                                                              |
| 527 | 1.128 | 604.06958 | Guanosine 5'-diphosphate-D-mannose                                                                                           | [M+H] <sup>+</sup>   | 604.06989 | C16H25N5O16P2 | Purine nucleotide sugars          | MMVSCBBUIHUTGJ-GDJBKNASNA-N  | OC[C@H]1O[C@H](OP(O)(=O)OP(O)(=O)OC[C@H]2O[C@H](C=C1)C(=O)C=C2)N2C=CC3=C2NC(=N)N=C3O[C@H]1O                   |
| 528 | 1.128 | 193.07103 | Methyl-beta-galactopyranoside                                                                                                | [M+H] <sup>+</sup>   | 193.07176 | C7H1406       | O-glycosyl compounds              | HOVAGTYPOGVJG-UHFFFAOYNA-N   | OC[C@H](O)C(C)(O)C1O                                                                                          |
| 529 | 1.13  | 522.20026 | (2S,3S)-3-hydroxy-2-((S)-2-((S)-2-(2-hydroxy-4-oxoquinazolin-3(4H)-yl)-3-(H-indol-3-yl)propanamido)propanamido)butanoic acid | [M+H] <sup>+</sup>   | 522.20001 | C26H27N507    | Oligopeptides                     | JZZOGGANLZATZ-1MSL1LBVSA-N   | O=C(O)C(NC(=O)C(NC(=O)C(NC(=O)C=2C=CC(=C2)N1)CC3=CN(C=4C=CC=CC4)C1)C1O                                        |
| 530 | 1.131 | 380.09595 | Atalaphylline                                                                                                                | [M+H] <sup>+</sup>   | 380.09744 | C23H25N04     | Acridones                         | GLXYKTAS1IUSRC-UHFFFAOYSA-N  | O=C1C=2C=CC=C(O)C2N3=C1C1(O)=C(C(=O)C=3CC=C(C)C)CC=C(C)C1                                                     |
| 531 | 1.132 | 462.17926 | Morphine_3_Glucuronide                                                                                                       | [M+H] <sup>+</sup>   | 462.17587 | C23H27N09     | Morphinans                        | WAEXKFNHRHFBZ-UHFFFAOYNA-N   | CN1CC23C4OC5=C(OC6OC(C)(O)C(O)C6O)C(O)=O=C(OC1C2C=C4O)=C35                                                    |
| 532 | 1.132 | 151.06015 | Xylitol                                                                                                                      | [M+H] <sup>+</sup>   | 151.0612  | C5H1205       | Sugar alcohols                    | HEBCKHPVO1AQTA-UHFFFAOYNA-N  | OC(C)(O)C(C)(O)CO                                                                                             |
| 533 | 1.133 | 253.0808  | Osthenol                                                                                                                     | [M+H] <sup>+</sup>   | 253.08    | C14H1403      | 7-hydroxycoumarins                | RAKJVIPCCGXHHS-UHFFFAOYSA-N  | O=C1OC2=C(C=C1)C=CC(O)=C2OC=C(C)C                                                                             |
| 534 | 1.133 | 219.02779 | THEOBROMINE                                                                                                                  | [M+H] <sup>+</sup>   | 219.02788 | C7H8N402      | Xanthines                         | YAPQBXVYLJRXSA-UHFFFAOYSA-N  | O=C1N=C(O)C2=C(N=CN2)N1C                                                                                      |
| 535 | 1.133 | 203.05363 | Theophylline                                                                                                                 | [M+H] <sup>+</sup>   | 203.05    | C7H8N402      | Xanthines                         | ZFXYPBG1UFBOJW-UHFFFAOYSA-N  | O=C1C=2NC=NC2N(C(=O)N1)C                                                                                      |
| 536 | 1.133 | 149.04483 | Xylose                                                                                                                       | [M+H] <sup>+</sup>   | 149.04555 | C5H1005       | Pentoses                          | PYMPYHUWUMLA-VPENIKCSA-N     | O=CC(O)C(O)C(O)CO                                                                                             |
| 537 | 1.134 | 400.14685 | 2,6-dihydroxy-3-mesityl-5-(1,2,3,4-tetrahydroisoquinolin-1-yl)pyrimidin-4(3H)-one                                            | [M+H] <sup>+</sup>   | 400.14999 | C22H23N303    | Tetrahydroisoquinolines           | IO1BYVJO1SLAKR1-UHFFFAOYSA-N | O=C1C(=C(O)N=C(O)N1C=2C(=CC(=C2)C)C)C3NCCC=4C=CC=CC43                                                         |
| 538 | 1.135 | 221.06551 | Ethyl-beta-glucuronide                                                                                                       | [M+H] <sup>+</sup>   | 221.06668 | C8H1407       | O-glucuronides                    | 1WJBMVJWSFZNJH-UHFFFAOYNA-N  | O=C(O)C1OC(OC)C(O)C(C)C1O                                                                                     |
| 539 | 1.136 | 274.1871  | 4-hydroxy-2-octylquinoline 1-oxide:Series 4 HAQ C8                                                                           | [M+H] <sup>+</sup>   | 274.18201 | C17H23N02     | 4-hydroxy-2-alkylquinolines       | UKKYWOFQJOMYIL-UHFFFAOYSA-N  | O=N1C=2C=CC=CC2(C)=CC1CCCCCCC                                                                                 |
| 54  |       |           |                                                                                                                              |                      |           |               |                                   |                              |                                                                                                               |

|     |        |            |                                                                                                          |                    |            |             |                                     |                              |                                                                           |
|-----|--------|------------|----------------------------------------------------------------------------------------------------------|--------------------|------------|-------------|-------------------------------------|------------------------------|---------------------------------------------------------------------------|
| 558 | 1. 145 | 275. 12375 | L-Saccharopine                                                                                           | [M-H] <sup>-</sup> | 275. 12485 | C11H20N2O6  | Glutamic acid and derivatives       | ZDGJAHTZVHLOT-YUMQZZPRSA-N   | N[C-H] (CCCCN[C-H] (CCC(O)=O) C(O)=O) C(O)=O                              |
| 559 | 1. 147 | 317. 11499 | Heptelidic acid chlorohydrin 130129                                                                      | [M+H] <sup>+</sup> | 317. 11499 | C15H21ClO5  | Terpene lactones                    | BJGUEPXNQBVBW-RTWAVKEYSA-N   | O=C(O) C1=CC2C(C(=O)OC1) C(O) (CC1) CCC2C(C) C                            |
| 560 | 1. 152 | 191. 01877 | ISOCITRIC ACID                                                                                           | [M-H] <sup>-</sup> | 191. 019   | C6H8O7      | Tricarboxylic acids and derivatives | ODBLHEXUDAPZAU-UHFFFAOYSA-N  | O=C(O) CC(C(=O)O) C(O) C(=O)O                                             |
| 561 | 1. 152 | 208. 1178  | Miglitol                                                                                                 | [M+H] <sup>+</sup> | 208. 11795 | C8H17NO5    | Piperidines                         | IBAQQPQHRJAVAV-UHFFFAOYNA-N  | OCCN1CC(O) C(O) C(O) C1CO                                                 |
| 562 | 1. 153 | 179. 05449 | Glucanolactone                                                                                           | [M+H] <sup>+</sup> | 179. 05501 | C6H10O6     | Glucanolactones                     | PHQVHQSTUBQKQ-UHFFFAOYNA-N   | O=C1OC(O) C(O) C(O) C1O                                                   |
| 563 | 1. 156 | 163. 05965 | 1,6-Anhydro-beta-D-glucose                                                                               | [M+H] <sup>+</sup> | 163. 0601  | C6H10O5     | Oxepanes                            | TWN1BLMWSKIRAT-VFUOTHLCSA-N  | O[C-H] 1[C-H] 2CO[C-H] (O2) [C-H] (O) [C-H] 1O                            |
| 564 | 1. 156 | 435. 08917 | Irisaxanthone                                                                                            | [M-H] <sup>-</sup> | 435. 09329 | C20H20O11   | Xanthones                           | MTQVPZUBZBTLNO-HSLVGEKZSA-N  | O=C1C2=CC=C(O) C(OC)=C2OC3=CC(O)=C(C(O)=C13) C4OC(CO) C(O) C(O) C4O       |
| 565 | 1. 157 | 233. 04103 | 2-pyridin-3-yl-thiazolidine-4-carboxylic acid                                                            | [M+H] <sup>+</sup> | 233. 03999 | C9H10N2O2S  | L-alpha-amino acids                 | FSNGLHIMQHWTFN-JGVFFNPUSA-N  | O=C(O) C1NC(SC1) C=2C=NC=CC2                                              |
| 566 | 1. 158 | 180. 08737 | Galactosamine                                                                                            | [M+H] <sup>+</sup> | 180. 08665 | C6H13NO5    | Hexoses                             | MSWZFWKMSRAUBD-UHFFFAOYNA-N  | OCC1OC(O) C(N) C(O) C1O                                                   |
| 567 | 1. 158 | 97. 02883  | Propionic acid                                                                                           | [M+H] <sup>+</sup> | 97. 03     | C3H6O2      | Carboxylic acids                    | XBQKXXY1PTUBI-UHFFFAOYSA-N   | O=C(O) CC                                                                 |
| 568 | 1. 159 | 184. 05969 | 4-PYRIDOXATE                                                                                             | [M+H] <sup>+</sup> | 184. 06    | C8H9NO4     | Pyridinecarboxylic acids            | HXACOUQ1XZGNBF-UHFFFAOYSA-N  | O=C(O) C1=C(O) C(=NC=C1CO) C                                              |
| 569 | 1. 161 | 298. 15143 | (3aS,8aR)-1,3a,8-trimethyl-1,2,3,3a,8,8a-hexahydropyrrolo[2,3-b]indol-5-yl methylcarbamate               | [M+H] <sup>+</sup> | 298. 14999 | C15H21N3O2  | Pyrroloindoles                      | PIJJDFTBXTXHHH-HI FRSDPNSA-N | O=C(OC1=CC=CC(=C1) C3(C) CCN(C) C3N2C) NC                                 |
| 570 | 1. 161 | 423. 08878 | 5-hydroxy-6,8-dimethoxy-7-[(2S,3R,4S,5S,6R)-3,4,5-trihydroxy-6-(hydroxymethyl)oxan-2-yl]oxychromen-2-one | [M+H] <sup>+</sup> | 423. 08978 | C17H20O11   | Coumarin glycosides                 | KDWYRFBEPULRG-KIZWGMFSA-N    | O=C1OC=2C(OC)=C(OC3OC(CO) C(O) C(O) C3O) C(OC)=C(O) C2C=C1                |
| 571 | 1. 162 | 166. 01382 | "PYRIDINE-2,3-DICARBOXYLATE"                                                                             | [M-H] <sup>-</sup> | 166. 01401 | C7H5NO4     | Pyridinecarboxylic acids            | GJAWHXHKYXBSV-UHFFFAOYSA-N   | O=C(O) C1=NC=CC=C1C(=O)O                                                  |
| 572 | 1. 163 | 256. 08228 | Caramboxin                                                                                               | [M+H] <sup>+</sup> | 256. 082   | C11H13NO6   | Phenylalanine and derivatives       | DYJJDGJHOLTGBO-ZETCQYMISA-N  | O=C(O) C1=C(O) C=C(OC) C=C1CC(N) C(=O)O                                   |
| 573 | 1. 164 | 241. 04602 | 7,8-dimethylalloxazine (lumichrome)                                                                      | [M-H] <sup>-</sup> | 241. 04625 | C12H10N4O2  | Flavins                             | ZJTJUVIJVLGSP-UHFFFAOYSA-N   | OC=1N=C(O) C=2N=C3C=C(C(=CC3=NC2N1) C) C                                  |
| 574 | 1. 169 | 170. 10217 | ADONITOL                                                                                                 | [M+H] <sup>+</sup> | 170. 10229 | C5H12O5     | Sugar alcohols                      | HEBKCHPVO1AQTA-UHFFFAOYSA-N  | OCC(O) C(O) C(O) CO                                                       |
| 575 | 1. 169 | 414. 1597  | narcotine                                                                                                | [M+H] <sup>+</sup> | 414. 16    | C22H23NO7   | Phthalide isoquinolines             | AKNNEG1BPJZJG-MSOLQXFVSA-N   | O=C1OC(C2=CC=C(OC) C(OC)=C12) C3C4=C(OC) C=5OCOC5C=C4CCN3C                |
| 576 | 1. 17  | 349. 08817 | (E)-3-[2-[(2S,3R,4S,5S,6R)-3,4,5-trihydroxy-6-(hydroxymethyl)oxan-2-yl]oxyphenyl]propan-2-enoic acid     | [M+H] <sup>+</sup> | 349. 08939 | C15H18O8    | Phenolic glycosides                 | GVRIYIMJGULCZ-ZMKUSUEASA-N   | O=C(O) C=C=C1CC=CC(OC1OC2OC(CO) C(O) C(O) C2O                             |
| 577 | 1. 171 | 350. 0845  | 2-(2,6-dihydroxy-4-methoxycarbonylbenzoyl)-3-hydroxybenzoic acid                                         | [M+H] <sup>+</sup> | 350. 08704 | C16H12O8    | Benzophenones                       | QQRQIRHJXTGCW-UHFFFAOYSA-N   | O=C(O) C=C1C=CC=C(O) C1C(=O) C2=C(O) C(=O) C(=C2O) C(=O) OC               |
| 578 | 1. 171 | 330. 0582  | 3',5'-Cyclic AMP                                                                                         | [M+H] <sup>+</sup> | 330. 05978 | C10H12N5O6P | 3',5'-cyclic purine nucleotides     | IVOMOUHDPKRL-LKQYXXCUSA-N    | NC1=C2N=CN([C-H] 3O[C-H] 3O[C-H] 4COP(O)(=O)O[C-H] 4[C-H] 3O) C2=NC(=N) 1 |
| 579 | 1. 171 | 200. 11229 | Pyrimethanil                                                                                             | [M+H] <sup>+</sup> | 200. 11823 | C12H13N3    | Aniline and substituted anilines    | ZLIBICFPKPGIZ-UHFFFAOYSA-N   | CC1=CC(C)=CC(=CC=C1C) C(=O)O                                              |
| 580 | 1. 176 | 409. 17883 | Beclomethasone                                                                                           | [M+H] <sup>+</sup> | 409. 17801 | C22H29ClO5  | 21-hydroxysteroids                  | NEMKJDKGKEAPL-WOOFSPWISA-N   | O=C1C=CC2(C(=C1) CCC3C4CC(C) C(O) C(=O) C4) C(C) CC(O) C3CC21) C          |
| 581 | 1. 178 | 129. 01866 | 4-Amino-2-chloropyridine                                                                                 | [M+H] <sup>+</sup> | 129. 02141 | C5H5ClN2    | Aminopyridines and derivatives      | BLBDTBGCPHPLJK-UHFFFAOYSA-N  | NC1=CC(C1)=NC=C1                                                          |
| 582 | 1. 178 | 251. 03645 | Bisphenol S                                                                                              | [M+H] <sup>+</sup> | 251. 03726 | C12H10O4S   | Benzenesulfonyl compounds           | VFPWNQTHUCYWMVZ-UHFFFAOYSA-N | C=1C=C(C(=CC1O) S(C2=CC=C(C(=C2)O) (=O)O                                  |
| 583 | 1. 179 | 242. 06512 | 1-(2-((1H-indol-3-yl)ethyl)thiourea                                                                      | [M+H] <sup>+</sup> | 242. 07001 | C11H13N3S   | 3-alkylindoles                      | HRBGONPRSGPFMT-UHFFFAOYSA-N  | S=C(N) NCCC1=CC=CC=C1C=CC2C1                                              |
| 584 | 1. 18  | 243. 09708 | beta-lapachone                                                                                           | [M+H] <sup>+</sup> | 243. 097   | C15H14O3    | Naphthopyranones                    | QZPQTZNNJUOLS-UHFFFAOYSA-N   | O=C1C(=O) C2=C(OC(C) C(O) C2) C=3C=CC=CC13                                |
| 585 | 1. 182 | 248. 11403 | 1-Isothiocyanato-9-(methylsulfinyl)-nonane                                                               | [M+H] <sup>+</sup> | 248. 11374 | C11H21NOS2  | Sulfoxides                          | MQFLXLMNOHPTC-UHFFFAOYNA-N   | CS(=O) CCCCCCCCCN=C=S                                                     |
| 586 | 1. 183 | 300. 12726 | Lotaustalin                                                                                              | [M+H] <sup>+</sup> | 300. 12491 | C11H19NO6   | Cyanogenic glycosides               | WEWBVMVTOYUPHH-GXUZXPEDSA-N  | N#CC(OC1OC(CO) C(O) C(O) C1O) (C) CC                                      |
| 587 | 1. 185 | 275. 09473 | (2R)-8-ethyl-7-hydroxy-5-methoxy-2-methyl-3,4-dihydrochromen-4-one                                       | [M+H] <sup>+</sup> | 275. 09579 | C13H16O4    | Chromones                           | BPTMO1WHAHUBPJ-SSDOTTSWSA-N  | O=C1C=2C(OC)=CC(O)=C(C2OC(C) C1) CC                                       |
| 588 | 1. 185 | 73. 02811  | PROPENOIC ACID                                                                                           | [M+H] <sup>+</sup> | 73. 0284   | C3H4O2      | Acrylic acids                       | NIXOWILLQJLNCW-UHFFFAOYSA-N  | OC(=O) C=C                                                                |
| 589 | 1. 187 | 213. 05269 | 2,4-Dihydroxybenzophenone                                                                                | [M-H] <sup>-</sup> | 213. 05573 | C13H10O3    | Benzophenones                       | ZXDDPOHVAWLBH-UHFFFAOYSA-N   | C1=CC=C(C(=C1) C) C=2C=CC(=CC2O) O=O                                      |
| 590 | 1. 19  | 318. 12933 | ethyl 3-(2,4-dihydroxy-6-methylpyridin-3-yl)-3-(3-hydroxyphenyl)propanoate                               | [M+H] <sup>+</sup> | 318. 13    | C17H19NO5   | Pyridinones                         | YKJXWYJQVADMO-UHFFFAOYSA-N   | O=C(OC) CC(C(=1C=CC(O) C1) C2=C(O) N=C(C=2O) C                            |
| 591 | 1. 191 | 244. 12846 | Agomelatine                                                                                              | [M+H] <sup>+</sup> | 244. 133   | C15H17NO2   | N-acetyl-2-arylethylamines          | YJYPHIXNFPHND-UHFFFAOYSA-N   | O=C(NCCC1=CC=CC2=CC=C(OC) C=C21) C                                        |
| 592 | 1. 191 | 320. 14288 | Norfloxacin (Norxacin)                                                                                   | [M+H] <sup>+</sup> | 320. 14099 | C16H18FN3O3 | Quinoline carboxylic acids          | OGJPXUAPXNRGGI-UHFFFAOYSA-N  | O=C(O) C1=CN(C2=CC(=C(F) C=C2C1=O) N3CCNCC3) CC                           |
| 593 | 1. 191 | 172. 09665 | terrein                                                                                                  | [M+H] <sup>+</sup> | 172. 09682 | C8H10O3     | 1,2-diols                           | MHOOPNKRBMHEC-HZIBQTDNSA-N   | O=C1C=C(C=CC) C(O) C1O                                                    |
| 594 | 1. 192 | 231. 02568 | 3-[(1-Carboxyvinyl)oxy]benzoic acid                                                                      | [M+H] <sup>+</sup> | 231. 02638 | C10H8O5     | Phenoxyacetic acid derivatives      | HGVAHYJMDVROLE-UHFFFAOYSA-N  | O=C(O) C(OC1=CC=CC(=C1) C(=O)O) O=C                                       |
| 595 | 1. 192 | 175. 04327 | 4-Methylumbelliferone                                                                                    | [M-H] <sup>-</sup> | 175. 04201 | C10H8O3     | 7-hydroxycoumarins                  | HSIN1TRMYLLCV-UHFFFAOYSA-N   | O=C1OC=2C=C(O) C=CC2(=C1) C                                               |
| 596 | 1. 192 | 217. 11894 | 5-isopropenyl-2-methyl-2-cyclohexen-1-yl acetate                                                         | [M+H] <sup>+</sup> | 217. 12    | C12H18O2    | Menthane monoterpeneoids            | YTHRBOFHYZBZBJ-VXGBAGGSA-N   | O=C(OC1C(=O) C(=CC(C(=C) C1) C) C                                         |
| 597 | 1. 193 | 333. 04517 | Methoxyhaemantosine                                                                                      | [M-H] <sup>-</sup> | 333. 04999 | C16H14O8    | Isochromanquinones                  | WPHIVUBMBWBSCK-SPHRHQWCSA-N  | O=C1OC(C) C(OC) C2=C(O) C=CC(O) C(OC)=CC(=O) C3C(O) C=C12                 |
| 598 | 1. 194 | 283. 09113 | 2-(5-formyl-3,4-dihydro-2,2-dimethyl-2H-pyran-6-yl)-Benzoic acid                                         | [M+H] <sup>+</sup> | 283. 091   | C15H14O3    | Naphthopyranones                    | QZPQTZNNJUOLS-UHFFFAOYSA-N   | O=C1C(=O) C2=C(OC(C) C(O) C2) C=3C=CC=CC13                                |
| 599 | 1. 194 | 150. 05768 | Methionine                                                                                               | [M+H] <sup>+</sup> | 150. 058   | C5H11NO2S   | Methionine and derivatives          | FFEARJCKVFRZRR-UHFFFAOYSA-N  | O=C(O) C(N) CCSC                                                          |
| 600 | 1. 195 | 273. 07199 | 5-Hydroxymethyluridine                                                                                   | [M-H] <sup>-</sup> | 273. 07281 | C10H14N2O7  | Pyrimidine nucleosides              | VQAJJNQKTRZJQ-UHFFFAOYNA-N   | O=C1N=C(O) C(=CN1C2OC(CO) C(O) C2O) CO                                    |

[illegible]

|     |        |            |                                                                                                                                                 |                     |            |                             |                                            |                              |                                                                             |
|-----|--------|------------|-------------------------------------------------------------------------------------------------------------------------------------------------|---------------------|------------|-----------------------------|--------------------------------------------|------------------------------|-----------------------------------------------------------------------------|
| 644 | 1. 22  | 269. 15915 | sophocarpine                                                                                                                                    | [M+H] <sup>+</sup>  | 269. 16    | C15H22N2O                   | Matrine alkaloids                          | AAGPPTSOPGCNQ-KYEXDWHISA-N   | O=C1C=CCC2N1CC3CCCN4CCCC2C43                                                |
| 645 | 1. 221 | 213. 12245 | Prolylproline                                                                                                                                   | [M+H] <sup>+</sup>  | 213. 12489 | C10H16N2O3                  | Dipeptides                                 | RWCOTTLHDJWHRS-UHFFFAOYNA-N  | O=C(O)C2N(C(=O)C1NCCC1)CCC2                                                 |
| 646 | 1. 223 | 344. 03741 | "GUANOSINE 3', 5'-CYCLIC MONOPHOSPHATE"                                                                                                         | [M-H] <sup>-</sup>  | 344. 04001 | C10H12N5O7P                 | 3', 5'-cyclic purine nucleotides           | ZOOGRGPOEVQX-UOQKFMHZA-N     | O=C1N=C(N)NC2=C1N=CN2C3OC4COP(=O)(O)OC4C3O                                  |
| 647 | 1. 223 | 247. 05748 | Haematomic Acid, Ethyl Ester                                                                                                                    | [M+H] <sup>+</sup>  | 247. 05769 | C11H12O5                    | p-Hydroxybenzoic acid alkyl esters         | HUXJGSHUVDWZAM-UHFFFAOYSA-N  | O=CC1=C(O)C=C(C(=O)OC)C=C1O                                                 |
| 648 | 1. 225 | 163. 06049 | 2-DEOXY-D-GLUCOSE                                                                                                                               | [M-H] <sup>-</sup>  | 163. 061   | C6H12O5                     | Fatty alcohols                             | VRALKFPQXWPIH-UHFFFAOYSA-N   | O=CCC(O)C(O)C(O)CO                                                          |
| 649 | 1. 225 | 391. 17041 | Pseudolaric Acid C                                                                                                                              | [M+H] <sup>+</sup>  | 391. 17001 | C21H26O7                    | Diterpene lactones                         | RBXVTEUAOTYME-GPGKBOPFSA-N   | O=C(O)C(=CC=CC1(OC(=O)C2CCC(=C(C(=O)OC)CCC3(O)C1CC2)C)C                     |
| 650 | 1. 226 | 375. 17523 | 3-[(E)-3, 4-dihydroxy-3, 5-dimethylhept-1-enyl]-7, 8-dihydroxy-7-methyl-8, 8a-dihydro-1H-isochromen-6-one                                       | [M+H] <sup>+</sup>  | 375. 1778  | C19H28O6                    | Azaphilones                                | ZMOXNUGJSHBRR-VOTSOKGWSA-N   | O=C1C=C2C=C(OC2CC(O)C1(C)C)C=CC(O)C(C)C(C)CC                                |
| 651 | 1. 226 | 241. 1554  | Alpha Cyperone                                                                                                                                  | [M+Na] <sup>+</sup> | 241. 14999 | C15H22O                     | Eudesmane, isoeudesmane or cycloesudesmane | KUFXJZXMWHNCEH-DOMZBBRYSA-N  | O=C1C(=C2CC(C(=C)C)CCC2(C)CC1)C                                             |
| 652 | 1. 228 | 308. 09705 | N-ACETYLNEURAMINATE                                                                                                                             | [M-H] <sup>-</sup>  | 308. 09799 | C11H19NO9                   | N-acylneuraminic acids                     | SQVRNKLJHWKZAKO-UHFFFAOYSA-N | O=C(O)C1(O)OC(C(O)C(O)CO)C(NC(=O)C)C(O)C1                                   |
| 653 | 1. 229 | 160. 06078 | ALPHA-AMINOADIPATE                                                                                                                              | [M-H] <sup>-</sup>  | 160. 061   | C6H11NO4                    | L-alpha-amino acids                        | OY1FNHCXNCRBQ1-BYPYZUCNSA-N  | O=C(O)CCCC(N)C(=O)O                                                         |
| 654 | 1. 229 | 178. 04991 | HIPPURATE                                                                                                                                       | [M-H] <sup>-</sup>  | 178. 05    | C9H9NO3                     | Hippuric acids                             | QIAPMBKCNZACKA-UHFFFAOYSA-N  | O=C(O)CNC(=O)C=1C=CC=CC1                                                    |
| 655 | 1. 23  | 280. 10553 | 1-Methyladenosine                                                                                                                               | [M-H] <sup>-</sup>  | 280. 10513 | C11H15N5O4                  | Purine nucleosides                         | GFYLSDSUHVORB-UHFFFAOYNA-N   | N=C1C=2N=CN(CN=CN1C)C3OC(CO)C(O)C3O                                         |
| 656 | 1. 23  | 306. 08517 | PFSM-ammonio_N_CMAmP_FT_FOSA                                                                                                                    | [M-H] <sup>-</sup>  | 306. 08667 | [C9H18F3N2O4S] <sup>+</sup> | PFSA                                       | UBADCKSMADBWHM-UHFFFAOYSA-O  | O=C(O)CC[N+](C)(C)CCCN3(=O)(=O)C(F)(F)F                                     |
| 657 | 1. 231 | 116. 03471 | N-ACETYLGLYCINE                                                                                                                                 | [M-H] <sup>-</sup>  | 116. 035   | C4H7NO3                     | N-acyl-alpha amino acids                   | OKJIRPAQVSHGFK-UHFFFAOYSA-N  | O=C(O)CNC(=O)C                                                              |
| 658 | 1. 232 | 298. 11313 | 7-Methylguanosine                                                                                                                               | [M+H] <sup>+</sup>  | 298. 11404 | C11H16N5O5                  | Purine nucleosides                         | OGHAROSJZRT1OK-UHFFFAOYNA-O  | N=C1N=C(O)C2=C(N1)N(C=[N+](2C)C3OC(CO)C(O)C3O                               |
| 659 | 1. 232 | 68. 05067  | Pyrrol                                                                                                                                          | [M+H] <sup>+</sup>  | 68. 04948  | C4H5N                       | Heteroaromatic compounds                   | KAESVJQAVNADME-UHFFFAOYSA-N  | C=1C=CNC1                                                                   |
| 660 | 1. 235 | 321. 04709 | THYMIDINE 5'-MONOPHOSPHATE                                                                                                                      | [M-H] <sup>-</sup>  | 321. 04901 | C10H15N2O8P                 | Pyrimidine 2' - deoxynucleoside            | GYZOZYVXFNDGLJ-UHFFFAOYSA-N  | O=C1NC(=O)N(C=C1C)C2OC(COP(=O)(O)O)C(O)C2                                   |
| 661 | 1. 237 | 273. 06055 | Pesticide3_Neburon_C12H16C12N2O_Urea_N-butyl-N-(3, 4-dichlorophenyl)-N-methyl-                                                                  | [M-H] <sup>-</sup>  | 273. 05701 | C12H16C12N2O                | N-phenylureas                              | CCPGUMWYLI1CGL-UHFFFAOYSA-N  | C1C1=CC=C(N=C(O)N(C)CCCC)C=C1C1                                             |
| 662 | 1. 238 | 363. 06802 | Esculin                                                                                                                                         | [M+H] <sup>+</sup>  | 363. 07001 | C15H16O9                    | Coumarin glycosides                        | XHCADAYNF1FUHF-TVKJYDYSA-N   | O=C1OC=2C(O)C(OC3OC(CO)C(O)C(O)C3O)=CC2C=C1                                 |
| 663 | 1. 239 | 212. 09132 | isoferulic acid                                                                                                                                 | [M+H] <sup>+</sup>  | 212. 09174 | C10H10O4                    | Hydroxycinnamic acids                      | QURCYMIEKCOAJU-HWKANZROSA-N  | O=C(O)C=CC1=CC=C(OC)C(O)=C1                                                 |
| 664 | 1. 24  | 542. 14038 | (S, Z)-2-((2-(3, 4-dimethoxybenzylidene)-3-oxo-2, 3-dihydrobenzofuran-6-yl)oxy)acetamido]-3-(4-hydroxyphenyl)propanoic acid                     | [M+H] <sup>+</sup>  | 542. 14001 | C28H25NO9                   | Tyrosine and derivatives                   | ZOLBQWQZBEHMY-CLVGAISSA-N    | O=C(O)C(NC(=O)CC1=CC=C2C(=O)C(OC2=C1)=CC3=CC=C(OC)C(O)C(=C3)CC4=CC=C(O)C=C4 |
| 665 | 1. 24  | 300. 1174  | Octopamine, N-p-coumaroyl-                                                                                                                      | [M+H] <sup>+</sup>  | 300. 12    | C17H17NO4                   | Styrenes                                   | VATOSFCFM0AIX-XCYCLJG0SA-N   | O=C(C=CC1=CC=C(O)C=C1)NCC(O)C2=CC=C(O)C=C2                                  |
| 666 | 1. 242 | 233. 14844 | Threonylleucine (isomer of 925, 926)                                                                                                            | [M+H] <sup>+</sup>  | 233. 1485  | C10H20N2O4                  | Dipeptides                                 | BQBC1BCLXBKYHW-UHFFFAOYNA-N  | O=C(O)C(NC(=O)C(N)C(O)C)CC(C)C                                              |
| 667 | 1. 243 | 108. 04404 | 2-Aminophenol                                                                                                                                   | [M+H] <sup>+</sup>  | 108. 04549 | C6H7NO                      | Aniline and substituted anilines           | CDAWCLQXVUBKRW-UHFFFAOYSA-N  | OC=1C=CC=CC1N                                                               |
| 668 | 1. 243 | 263. 0542  | maclurin                                                                                                                                        | [M+H] <sup>+</sup>  | 263. 06    | C13H10O6                    | Benzophenones                              | XNWPXDGRBWJ1ES-UHFFFAOYSA-N  | O=C(C1=CC=C(O)C(O)=C1)C=2C(O)=CC(O)=CC2O                                    |
| 669 | 1. 244 | 297. 10928 | 4-hydroxy-8-methoxy-5-methyl-3-(3-methylbut-2-enyl)chromen-2-one                                                                                | [M+H] <sup>+</sup>  | 297. 10971 | C16H18O4                    | 4-hydroxycoumarins                         | YPKUMLVKFVYOT-UHFFFAOYSA-N   | O=C1OC2=C(OC)C=CC(=C2(O)=C1CC=C(C)C)C                                       |
| 670 | 1. 244 | 201. 08812 | Methyleugenol                                                                                                                                   | [M+H] <sup>+</sup>  | 201. 09    | C11H14O2                    | Dimethoxybenzenes                          | ZYEMGP1YFJGTP-UHFFFAOYSA-N   | O(C1=CC=C(C(=1OC)CC=C)C                                                     |
| 671 | 1. 245 | 133. 04996 | DEOXYRIBOSE                                                                                                                                     | [M-H] <sup>-</sup>  | 133. 05    | C5H10O4                     | Beta-hydroxy aldehydes                     | ASJSAQ1RZKANQN-UHFFFAOYSA-N  | O=CCC(O)C(O)CO                                                              |
| 672 | 1. 25  | 171. 02905 | 3-DEHYDROSHIKIMATE                                                                                                                              | [M-H] <sup>-</sup>  | 171. 02901 | C7H8O5                      | Cyclohexenones                             | SLWJWJZMPHJJOPI-PHDIDXHISA-N | O=C(O)C1=CC(=O)C(O)C(O)C1                                                   |
| 673 | 1. 25  | 155. 0811  | Cyclo-prolylglycine                                                                                                                             | [M+H] <sup>+</sup>  | 155. 0815  | C7H10N2O2                   | Amino acids                                | OWOHLURDBZHNGG-UHFFFAOYNA-N  | O=C1CNC(=O)C2CCCN12                                                         |
| 674 | 1. 25  | 215. 10204 | LEVODOPA                                                                                                                                        | [M+H] <sup>+</sup>  | 215. 10263 | C9H11NO4                    | Tyrosine and derivatives                   | WTDROQBEARIYVC-LURJTMIESA-N  | O=C(O)C(N)CC1=CC=C(O)C(O)=C1                                                |
| 675 | 1. 25  | 154. 04971 | N-(2, 5-dioxocyclopentyl)acetamide                                                                                                              | [M-H] <sup>-</sup>  | 154. 049   | C7H9NO3                     | Beta-diketones                             | QVZXVWBZHYCGL-UHFFFAOYSA-N   | O=C1CCC(=O)C1N=C(O)C                                                        |
| 676 | 1. 252 | 283. 13013 | (2S, 8R)-8-hydroxy-2-[(1S)-1-hydroxyheptyl]-2, 3, 4, 6, 7, 8-hexahydrochromen-5-one                                                             | [M+H] <sup>+</sup>  | 283. 13016 | C16H26O4                    | Benzopyrans                                | INHVP1PHEJQOP-ZNMIVQWSA-N    | O=C1C2=C(OC(C2)C(O)CCCCC)C(O)CC1                                            |
| 677 | 1. 257 | 271. 04425 | alternariol monomethyl ether                                                                                                                    | [M-H] <sup>-</sup>  | 271. 04236 | C15H12O5                    | Coumarins and derivatives                  | LCSQDFNUYFTXMT-UHFFFAOYSA-N  | O=C1OC2=CC(O)=CC(=C2C3=CC(OC)=CC(O)=C13)C                                   |
| 678 | 1. 257 | 411. 09671 | Artemitin                                                                                                                                       | [M+H] <sup>+</sup>  | 411. 10001 | C20H20O8                    | 7-O-methylated flavonoids                  | RIGYMJVPEJNCKD-UHFFFAOYSA-N  | O=C1C(OC)=C(OC=2C=C(OC)C(OC)=C(O)C12)C=3C=CC(OC)=C(OC)C3                    |
| 679 | 1. 257 | 388. 12189 | fraxin                                                                                                                                          | [M+H] <sup>+</sup>  | 388. 12381 | C16H18O10                   | Coumarin glycosides                        | CRSFLLTWRCYXNK-QBNNVSCSA-N   | O=C1OC=2C(OC3OC(CO)C(O)C(O)C3O)=C(O)C(OC)=CC2C=C1                           |
| 680 | 1. 258 | 229. 03406 | Asulam                                                                                                                                          | [M-H] <sup>-</sup>  | 229. 02885 | C8H10N2O4S                  | Aminobenzenesulfonamides                   | VGPYEIKOIGJKV-UHFFFAOYSA-N   | OC(O)=NS(=O)(=O)C1=CC=C(N)C=C1                                              |
| 681 | 1. 264 | 423. 19849 | N-Fructosyl isoleucylglutamate                                                                                                                  | [M+H] <sup>+</sup>  | 423. 1994  | C17H30N2O10                 | N-Fructosyl peptides                       | OJDUYMYADCXNAN-UHFFFAOYNA-N  | O=C(O)CCC(NC(=O)C(NCCT(O)(OC(CO)C(O)C1(O)C)C(C)C)C(=O)O                     |
| 682 | 1. 265 | 274. 05573 | Flufenacet ESA                                                                                                                                  | [M-H] <sup>-</sup>  | 274. 05548 | C11H14FN04S                 | Anilides                                   | SZCMHDLQVYZYST-UHFFFAOYSA-N  | CC(C)N(C(O)CS(O)=(O)=O)C1=CC=C(F)C=C1                                       |
| 683 | 1. 266 | 229. 08144 | Dihydroresveratrol                                                                                                                              | [M-H] <sup>-</sup>  | 229. 08702 | C14H14O3                    | Stilbene glycosides                        | H1TJFUSPLYBJPE-UHFFFAOYSA-N  | OC1=CC=C(C=C1)CCC2=CC(O)=CC(O)=C2                                           |
| 684 | 1. 268 | 403. 1062  | 2-[3-ethenyl-5-methoxycarbonyl-2-[(2S, 3R, 4S, 5S, 6R)-3, 4, 5-trihydroxy-6-(hydroxymethyl)oxan-2-yl]oxy-3, 4-dihydro-2H-pyran-4-yl]acetic acid | [M-H] <sup>-</sup>  | 403. 10376 | C17H24O11                   | Terpene glycosides                         | MQLSOVRLZHTATK-WNCYHATQSA-N  | O=C(O)CC1C=CC(OC2OC(CO)C(O)C(O)C2O)C1C=C(C(O)OC                             |
| 685 | 1. 271 | 453. 13568 | bungeiside C                                                                                                                                    | [M+H] <sup>+</sup>  | 453. 13672 | C19H26O11                   | Phenolic glycosides                        | YQOKGDRMWQLQNR-BMWMOQRNSA-N  | O=C(C1=CC=C(OC2OC(COC3OC(CO)C(O)C3O)C(O)C(O)C2O)C=C1)C                      |
| 686 | 1. 271 | 303. 0462  | Flavanone base + 50                                                                                                                             | [M-H] <sup>-</sup>  | 303. 0498  | C15H12O7                    | Flavanone 0-glycosides                     | CXQWRCVTOMQVX-UHFFFAOYNA-N   | O=C2C3=C(O)C=C(O)C=C3(OC(C1C=CC(O)=C(O)C=C1)C2(O))                          |

[illegible]

|     |       |           |                                                                                                                                           |                    |           |               |                                            |                              |                                                                                 |
|-----|-------|-----------|-------------------------------------------------------------------------------------------------------------------------------------------|--------------------|-----------|---------------|--------------------------------------------|------------------------------|---------------------------------------------------------------------------------|
| 730 | 1.361 | 425.1936  | 2-[5-[2-[2-[5-(2-hydroxypropyl)oxolan-2-yl]propanoyloxy]propyl]oxolan-2-yl]propanoic acid                                                 | [M+H] <sup>+</sup> | 425.1936  | C20H3407      | Dicarboxylic acids and derivatives         | V1HRKOVWCGJQP-UHFFFAOYSA-N   | O=C(O)C(C)C1OC(C(C)C)CC(OC(=O)C(C)C)C2OC(C(C)C)C(C)C                            |
| 731 | 1.361 | 415.17322 | 6-formyl-10-(hydroxymethyl)-5-methoxy-3-methylidene-2-oxo-2H,3H,3aH,4H,5H,8H,9H,11aH-cyclodecab[h]furan-4-yl 2-methylbutanoate            | [M+H] <sup>+</sup> | 415.1727  | C21H2807      | Germacranolides and derivatives            | LOFBWESBEBUNJU-FRYCYAQMISA-N | O=CC1=CCCC(=C2OC(=O)C(=C)C)C2C(OC(=O)C(C)C)C1OC)CO                              |
| 732 | 1.361 | 204.12425 | Isopentenyladenine                                                                                                                        | [M+H] <sup>+</sup> | 204.12437 | C10H13N5      | 6-alkylaminopurines                        | HYVABZ1GRDEKCD-UHFFFAOYSA-N  | N=1C=NC=2C1NC=NC2NCC=C(C)C                                                      |
| 733 | 1.363 | 331.06491 | Gallic acid hexoside                                                                                                                      | [M-H] <sup>-</sup> | 331.06491 | C13H16O10     | Phenolic glycosides                        | GDVRUDXLQBVIKP-UHFFFAOYNA-N  | O=C(OC1OC(CO)C(O)C(O)C1(O))C2=CC(O)=C(O)C(O)=C2                                 |
| 734 | 1.363 | 261.1459  | Glutamylleucine                                                                                                                           | [M+H] <sup>+</sup> | 261.1459  | C11H20N2O5    | Dipeptides                                 | MYFMARDICOWMQP-UHFFFAOYNA-N  | O=C(O)C(N)CCC(=O)NC(C(=O)O)CC(C)C                                               |
| 735 | 1.364 | 282.14529 | Pendimethalin                                                                                                                             | [M+H] <sup>+</sup> | 282.14484 | C13H19N3O4    | Dinitroanilines                            | CH1FOSRWNCZCFN-UHFFFAOYSA-N  | CCC(CC)NC1=C(C=C(C)C(C)=C1N(=O)=O)N(=O)=O                                       |
| 736 | 1.369 | 247.0385  | Fludioxonil                                                                                                                               | [M-H] <sup>-</sup> | 247.03246 | C12H6F2N2O2   | Benzodioxoles                              | MUJOIMFYNIEBMC-UHFFFAOYSA-N  | FC1(F)OC2=CC=CC(=C2O1)C1=CNC=C1C#N                                              |
| 737 | 1.371 | 296.1579  | Nuciferine                                                                                                                                | [M+H] <sup>+</sup> | 296.16    | C19H21NO2     | Aporphines                                 | JR1VQPIHKOARKV-OAHLLOKOSA-N  | O(C=1C=C2C3=C(C1OC)C4=CC=CC=C4CC3N(C)CC2)C                                      |
| 738 | 1.375 | 423.19608 | 5-[(Z)-12-(3,5-dihydroxyphenyl)dodec-8-enyl]benzene-1,3-diol                                                                              | [M+H] <sup>+</sup> | 423.19321 | C24H32O4      | Resorcinols                                | JD1DEXHTJXTVES-HYXAFXHYSA-N  | OC=1C=C(O)C=C(C(C)C)CCCC=CCCCCCC=2C(O)C=C(O)C2                                  |
| 739 | 1.375 | 366.07083 | GALANTHAMINE HYDROBROMIDE                                                                                                                 | [M-H] <sup>-</sup> | 366.07101 | C17H22BrN03   | Galanthamine-type amarvilliaceae alkaloids | QORVIGQLPPAFRS-UHFFFAOYSA-N  | Br. OC1C=C23C4=C(OC2C1)C(OC)=CC=C4CN(C)CC3                                      |
| 740 | 1.378 | 439.08249 | (Z)-methyl 4-((9-(furan-2-yl)-3,7-dioxo-3,7,8,9-tetrahydro-2H-furo[2,3-f]chromen-2-ylidene)methyl)benzoate                                | [M+H] <sup>+</sup> | 439.07999 | C24H16O7      | Aurone flavonoids                          | KUN1PLHO1JFHHR-ODLFYWEKSA-N  | O=C(OC)C1=CC=C(C=C1)C=C2OC=3C(=CC=C4OC(=O)CC(C=5OC=CC5)C43)C2=O                 |
| 741 | 1.378 | 235.14507 | Coumaroyl putrescine                                                                                                                      | [M+H] <sup>+</sup> | 235.1447  | C13H18N2O2    | Coumaric acid and derivatives              | CJHDBEPXKGBDW-UHFFFAOYSA-N   | O=C(C=C(C1=CC=CC(O)C=C1)NCCCC                                                   |
| 742 | 1.378 | 343.19937 | Pesticide3 Iprovalicarb Isomer 1* C18H28N2O3 Isopropyl [(2S)-3-methyl-1-[[1-(4-methylphenyl)ethyl]amino]-1-oxo-2-butan-1-yl]carbamate     | [M+H] <sup>+</sup> | 343.19901 | C18H28N2O3    | Toluenes                                   | NWUWYYSKZY1QAE-WMAAGAKSA-N   | OC(=NC(C)C(O)=NC(C1=CC=C(C=C1)C)C(C)C(O)C(C)C                                   |
| 743 | 1.382 | 102.02722 | Biuret                                                                                                                                    | [M-H] <sup>-</sup> | 102.0309  | C2H5N3O2      | Isoureas                                   | OHJMTUP1ZMNBFR-UHFFFAOYSA-N  | N=C(O)NC(=N)O                                                                   |
| 744 | 1.388 | 131.07187 | 2-Hydroxy-4-methylpentanoic acid                                                                                                          | [M-H] <sup>-</sup> | 131.07137 | C6H12O3       | Hydroxy fatty acids                        | LVRFTAZAXQPHI-UHFFFAOYNA-N   | O=C(O)C(O)CC(C)C                                                                |
| 745 | 1.388 | 330.11115 | Nizatidine                                                                                                                                | [M-H] <sup>-</sup> | 330.10638 | C12H21N5O2S2  | 2,4-disubstituted thiazoles                | SCXXNSQHWDMGGP-UHFFFAOYSA-N  | O=N(=O)C(=O)NC(NCSCC=1N=C(SC1)CN(C)C                                            |
| 746 | 1.393 | 154.0139  | 4-Nitrocatechol                                                                                                                           | [M-H] <sup>-</sup> | 154.01459 | C6H5NO4       | Nitrophenols                               | XJNPXNSISMKQEX-UHFFFAOYSA-N  | O=N(=O)C1=CC=C(O)C(C)=C1                                                        |
| 747 | 1.393 | 182.04498 | 4-Pyridoxic acid                                                                                                                          | [M-H] <sup>-</sup> | 182.04588 | C8H9NO4       | Pyridinecarboxylic acids                   | HXACOUQ1XZGNBF-UHFFFAOYSA-N  | O=C(O)C1=C(O)C(=NC=C1CO)C                                                       |
| 748 | 1.396 | 387.14172 | [(3aR,4S,6R,11aR)-6,9-dihydroxy-6,10-dimethyl-3-methylidene-2,7-dioxo-3a,4,5,8,9,11a-hexahydrocyclodecab[h]furan-4-yl] 2-methylpropanoate | [M+H] <sup>+</sup> | 387.14142 | C19H24O7      | Germacranolides and derivatives            | JGWDBQRL0BLTHU-XHOJJKXOPSA-N | O=C(OC1CC(O)C(=O)CC(OC)C(=CC2OC(=O)C(=C)C21)C(C)C(=C)C                          |
| 749 | 1.396 | 261.0957  | 3-hydroxyflavone                                                                                                                          | [M+H] <sup>+</sup> | 261.09534 | C15H10O3      | Flavonols                                  | HVQAJTFOCKORIN-UHFFFAOYSA-N  | O=C1C(O)C(=C(OC=2C=CC=C21)C=3C=CC=CC3                                           |
| 750 | 1.396 | 438.24002 | Dicoumaroyl Spermidine                                                                                                                    | [M+H] <sup>+</sup> | 438.23981 | C25H31N3O4    | Coumaric acid and derivatives              | QYBCMVQSCJMSA-UHFFFAOYSA-N   | O=C(C=CC1=CC=C(O)C=C1)NCCCNCCCNCC(=O)C=C2C=CC=C(O)C=C2                          |
| 751 | 1.396 | 322.15076 | Famciclovir                                                                                                                               | [M+H] <sup>+</sup> | 322.15097 | C14H19N5O4    | Purines and purine derivatives             | GGXKRWVZWMJTEH-UHFFFAOYSA-N  | O=C(OC(COC(=O)C)CCN1C=NC2=CNC(=N)N=C21)C                                        |
| 752 | 1.396 | 308.17105 | Zolpidem                                                                                                                                  | [M+H] <sup>+</sup> | 308.17575 | C19H21N3O     | Phenylimidazoles                           | ZAFYATHCZYHLPB-UHFFFAOYSA-N  | O=C(N(C)C)CC1=C(N=C2C=CC(=CN21)C)C3=CC=C(C=C3)C                                 |
| 753 | 1.4   | 218.13818 | Propionylcarnitine                                                                                                                        | [M+H] <sup>+</sup> | 218.13869 | C10H19NO4     | Acyl carnitines                            | UFAHZZIUPFNSHSL-UHFFFAOYNA-N | O=C([O-])CC(OC(=O)C)C[N-](C)C(C)C                                               |
| 754 | 1.413 | 195.11346 | Hydroxypyridin + C5H10NO or 6-Hydroxypseudooxynicotine (not validated)                                                                    | [M+H] <sup>+</sup> | 195.11369 | C10H14N2O2    | Nicotine and derivatives                   | UML0UOEDBG0HHR-UHFFFAOYNA-N  | O=C(C=C1C(=O)C(=CC1)CCCC                                                        |
| 755 | 1.422 | 392.11758 | S-(2-Carboxypropyl)glutathione                                                                                                            | [M-H] <sup>-</sup> | 392.11249 | C14H23N3O8S   | Peptides                                   | JQWABENXYMJMW-UHFFFAOYNA-N   | O=C(O)CNC(=O)C(=O)CNC(=O)CCC(N(C(=O)O)CSCC(C(=O)O)C                             |
| 756 | 1.428 | 254.11336 | Triantereene                                                                                                                              | [M+H] <sup>+</sup> | 254.11501 | C12H11N7      | Pteridines and derivatives                 | FNYLWVPVPXG1IP-UHFFFAOYSA-N  | N1=C(N=C(N)C2=NC(=C(N=C12)N)C3=CC=CC=C3)N                                       |
| 757 | 1.432 | 146.11812 | (3R,4S)-3-Amino-4-methylhexanoic acid                                                                                                     | [M+H] <sup>+</sup> | 146.11755 | C7H15NO2      | Beta amino acids and derivatives           | JHEDYGILOIBOTL-NTSWFWBYSA-N  | CC[C@H](C)C[C@H](N)CC(O)=O                                                      |
| 758 | 1.432 | 362.11255 | Bezafibrate                                                                                                                               | [M+H] <sup>+</sup> | 362.11536 | C19H20ClN04   | Phenoxyacetic acid derivatives             | 11BYAHWJQTYFKB-UHFFFAOYSA-N  | CC(C)C(C(=O)O)OC1=CC=C(C=C1)CCNC(C2=CC=C(C=C2)C1)=O                             |
| 759 | 1.436 | 371.08096 | Rebamipide                                                                                                                                | [M+H] <sup>+</sup> | 371.07901 | C19H15ClN2O4  | Hippuric acids                             | ALLWOAYDORUJLA-UHFFFAOYSA-N  | O=C1C=C(C(=2C=CC=C2N1)CC(NC(=O)C3=CC=C(C1)C=C3)C(=O)O                           |
| 760 | 1.439 | 203.13892 | Ala-Ile                                                                                                                                   | [M+H] <sup>+</sup> | 203.13902 | C9H18N2O3     | Dipeptides                                 | ZSOTCJZJSRWNHX-UHFFFAOYNA-N  | O=C(O)C(N=C(O)C(N)C)C(C)CC                                                      |
| 761 | 1.442 | 341.10834 | Trehalose                                                                                                                                 | [M-H] <sup>-</sup> | 341.10895 | C12H22O11     | O-glycosyl compounds                       | HDTRYLNUVZCOYI-UHFFFAOYNA-N  | OC(C1OC(OC2OC(CO)C(O)C2O)C(O)C1O)C1O                                            |
| 762 | 1.444 | 542.1701  | PUROMYCIN HYDROCHLORIDE                                                                                                                   | [M-H] <sup>-</sup> | 542.16907 | C22H31ClN27O5 | Purine 3'-deoxyribonucleosides             | MKSVFGKWLUTTO-FZFAUISWSA-N   | Cl.C1.OC(=NC1C(O)C(OC1CO)N2C=NC=3C2=NC=3N(C)C(C)C(C)CC4=CC=C(OC)C=C4            |
| 763 | 1.449 | 105.07031 | "L-2,3-DIAMINOPROPIONIC ACID"                                                                                                             | [M+H] <sup>+</sup> | 105.07    | C3H8N2O2      | Alpha amino acids                          | PECYZEOJVMXISF-UHFFFAOYSA-N  | O=C(O)C(N)CN                                                                    |
| 764 | 1.462 | 258.06073 | 2-Thiocytidine                                                                                                                            | [M-H] <sup>-</sup> | 258.05539 | C9H13N3O4S    | Pyrimidine nucleosides                     | RHFUOMFWGUKKO-UHFFFAOYNA-N   | N=C1N=C(S)N(C=C1)C2OC(CO)C(O)C2O                                                |
| 765 | 1.464 | 263.052   | Sorbitol-6-phosphate                                                                                                                      | [M+H] <sup>+</sup> | 263.05264 | C6H15O9P      | Monosaccharide phosphates                  | GACTVZZWMVMURNG-UHFFFAOYNA-N | O=P(O)(O)OC(CO)C(O)C(O)C(CO)CO                                                  |
| 766 | 1.468 | 479.1684  | 2-[3,4-dihydroxy-2,2-dimethyl-8-(3-methylbut-2-en-1-yl)-3,4-dihydrochromen-6-yl]-5,7-dihydroxy-2,3-dihydrochromen-4-one                   | [M+H] <sup>+</sup> | 479.16763 | C25H28O8      | 3'-prenylated flavanones                   | LNFRDRVYARCALE-UHFFFAOYSA-N  | O=C1C=2C(O)=CC(O)=CC2OC(C3=CC(OC(=C(C)C)=C4OC(C)C(C)C(O)C4)=C3)C1               |
| 767 | 1.47  | 282.11804 | 2'-O-Methyladenosine                                                                                                                      | [M+H] <sup>+</sup> | 282.11969 | C11H15N5O4    | Purine nucleosides                         | PFUGCISOLXNPPC-UHFFFAOYNA-N  | OC(C1OC(N2C=NC=3C(=NC32)N(C)CC(C)C1O                                            |
| 768 | 1.475 | 144.06543 | 4-Hydroxy-6-Methylpyran-2-One                                                                                                             | [M+H] <sup>+</sup> | 144.06552 | C6H6O3        | Pyranones and derivatives                  | NSYSSMYQLSPOD-UHFFFAOYSA-N   | O=C1OC(=C)C(=O)C=C1C                                                            |
| 769 | 1.476 | 432.10999 | HMB0A + O-Hex                                                                                                                             | [M-H] <sup>-</sup> | 432.11371 | C16H21NO10    | Benzoxazinoids                             | UOASSFRPBORTCT-UHFFFAOYNA-N  | O=C2N(CO)C=C3C=CC(OC)=CC3(OC2(OC1OC(CO)C(O)C1)C1(O))                            |
| 770 | 1.481 | 593.15564 | kaempferol 7-neohesperidoside                                                                                                             | [M-H] <sup>-</sup> | 593.1579  | C27H30O15     | Flavonoid-7-O-glycosides                   | ZEJXENDZTYVXD-CSIJBIPPSA-N   | O=C1C(O)=C(OC2=CC(OC3OC(CO)C(O)C3OC4OC(C)C(O)C4O)C(=O)C2=CC(=C12)C=5C=CC(O)=CC5 |
| 771 | 1.483 | 361.15149 | Perivine                                                                                                                                  | [M+H] <sup>+</sup> | 361.14999 | C20H22N2O3    | Vobasan alkaloids                          | NKTOURNHXYVXS-XXMLWKDOSAN    | O=C(OC)C1C2NCC(=CC1)CC(=O)C=3NC=4C=CC=CC4C3C2                                   |
| 772 | 1.484 | 269.02911 | 3-deoxysappanchalcone                                                                                                                     | [M-H] <sup>-</sup> | 269.02448 | C16H14O4      | Cinnamylphenols                            | PACBGANPNVHGNP-RUTMKATFSA-N  | O=C(C(=CC1=CC(=O)C=C1)C2=CC=C(C)C=C2OC                                          |

|     |       |           |                                    |        |           |           |        |                             |                                                                                                                                                                                                                                                                                                                                                                                                                                                                                                                                                                                                                                                                                                                                                                                                                                                                                                                                                                                                                                                                                                                                                                                                                                                                                                                                                                                                                                                                                                                                                                                                                                                                                                                                                                                                                                                                                                                                                                                                                                                                                                                                                                                                                                                                                                                                                                                                                                                                                                                                                                                                                                                                                                                                                                                                                                                                                                                                                                                                                                                                                                                                                                                                                                                                                                                                                                                                                                                                                                                                                                                                                                                                                                                                                                                                                                                                                                                                                                                                                                                                                                                                                                                                                                                                                                                                                                                                                                                                                                                                                                          |
|-----|-------|-----------|------------------------------------|--------|-----------|-----------|--------|-----------------------------|--------------------------------------------------------------------------------------------------------------------------------------------------------------------------------------------------------------------------------------------------------------------------------------------------------------------------------------------------------------------------------------------------------------------------------------------------------------------------------------------------------------------------------------------------------------------------------------------------------------------------------------------------------------------------------------------------------------------------------------------------------------------------------------------------------------------------------------------------------------------------------------------------------------------------------------------------------------------------------------------------------------------------------------------------------------------------------------------------------------------------------------------------------------------------------------------------------------------------------------------------------------------------------------------------------------------------------------------------------------------------------------------------------------------------------------------------------------------------------------------------------------------------------------------------------------------------------------------------------------------------------------------------------------------------------------------------------------------------------------------------------------------------------------------------------------------------------------------------------------------------------------------------------------------------------------------------------------------------------------------------------------------------------------------------------------------------------------------------------------------------------------------------------------------------------------------------------------------------------------------------------------------------------------------------------------------------------------------------------------------------------------------------------------------------------------------------------------------------------------------------------------------------------------------------------------------------------------------------------------------------------------------------------------------------------------------------------------------------------------------------------------------------------------------------------------------------------------------------------------------------------------------------------------------------------------------------------------------------------------------------------------------------------------------------------------------------------------------------------------------------------------------------------------------------------------------------------------------------------------------------------------------------------------------------------------------------------------------------------------------------------------------------------------------------------------------------------------------------------------------------------------------------------------------------------------------------------------------------------------------------------------------------------------------------------------------------------------------------------------------------------------------------------------------------------------------------------------------------------------------------------------------------------------------------------------------------------------------------------------------------------------------------------------------------------------------------------------------------------------------------------------------------------------------------------------------------------------------------------------------------------------------------------------------------------------------------------------------------------------------------------------------------------------------------------------------------------------------------------------------------------------------------------------------------------------------------|
| 773 | 1.485 | 711.21649 | Tetrasaccharides (Hex-Hex-Hex-Hex) | [M-H]- | 711.21698 | C24H42O21 | Sugars | UQZ1YBXSHAGNOE-UHFFFAOYNA-N | OCC4OC(OCC3OC(OCC2OC(C1(C(CO(C)C)O)C1O))C(O)C(CO)C(CO)C2O)C(CO)C(CO)C3O)C(CO)C4O)C(CO)C5O)C(CO)C6O)C(CO)C7O)C(CO)C8O)C(CO)C9O)C(CO)C10O)C(CO)C11O)C(CO)C12O)C(CO)C13O)C(CO)C14O)C(CO)C15O)C(CO)C16O)C(CO)C17O)C(CO)C18O)C(CO)C19O)C(CO)C20O)C(CO)C21O)C(CO)C22O)C(CO)C23O)C(CO)C24O)C(CO)C25O)C(CO)C26O)C(CO)C27O)C(CO)C28O)C(CO)C29O)C(CO)C30O)C(CO)C31O)C(CO)C32O)C(CO)C33O)C(CO)C34O)C(CO)C35O)C(CO)C36O)C(CO)C37O)C(CO)C38O)C(CO)C39O)C(CO)C40O)C(CO)C41O)C(CO)C42O)C(CO)C43O)C(CO)C44O)C(CO)C45O)C(CO)C46O)C(CO)C47O)C(CO)C48O)C(CO)C49O)C(CO)C50O)C(CO)C51O)C(CO)C52O)C(CO)C53O)C(CO)C54O)C(CO)C55O)C(CO)C56O)C(CO)C57O)C(CO)C58O)C(CO)C59O)C(CO)C60O)C(CO)C61O)C(CO)C62O)C(CO)C63O)C(CO)C64O)C(CO)C65O)C(CO)C66O)C(CO)C67O)C(CO)C68O)C(CO)C69O)C(CO)C70O)C(CO)C71O)C(CO)C72O)C(CO)C73O)C(CO)C74O)C(CO)C75O)C(CO)C76O)C(CO)C77O)C(CO)C78O)C(CO)C79O)C(CO)C80O)C(CO)C81O)C(CO)C82O)C(CO)C83O)C(CO)C84O)C(CO)C85O)C(CO)C86O)C(CO)C87O)C(CO)C88O)C(CO)C89O)C(CO)C90O)C(CO)C91O)C(CO)C92O)C(CO)C93O)C(CO)C94O)C(CO)C95O)C(CO)C96O)C(CO)C97O)C(CO)C98O)C(CO)C99O)C(CO)C100O)C(CO)C101O)C(CO)C102O)C(CO)C103O)C(CO)C104O)C(CO)C105O)C(CO)C106O)C(CO)C107O)C(CO)C108O)C(CO)C109O)C(CO)C110O)C(CO)C111O)C(CO)C112O)C(CO)C113O)C(CO)C114O)C(CO)C115O)C(CO)C116O)C(CO)C117O)C(CO)C118O)C(CO)C119O)C(CO)C120O)C(CO)C121O)C(CO)C122O)C(CO)C123O)C(CO)C124O)C(CO)C125O)C(CO)C126O)C(CO)C127O)C(CO)C128O)C(CO)C129O)C(CO)C130O)C(CO)C131O)C(CO)C132O)C(CO)C133O)C(CO)C134O)C(CO)C135O)C(CO)C136O)C(CO)C137O)C(CO)C138O)C(CO)C139O)C(CO)C140O)C(CO)C141O)C(CO)C142O)C(CO)C143O)C(CO)C144O)C(CO)C145O)C(CO)C146O)C(CO)C147O)C(CO)C148O)C(CO)C149O)C(CO)C150O)C(CO)C151O)C(CO)C152O)C(CO)C153O)C(CO)C154O)C(CO)C155O)C(CO)C156O)C(CO)C157O)C(CO)C158O)C(CO)C159O)C(CO)C160O)C(CO)C161O)C(CO)C162O)C(CO)C163O)C(CO)C164O)C(CO)C165O)C(CO)C166O)C(CO)C167O)C(CO)C168O)C(CO)C169O)C(CO)C170O)C(CO)C171O)C(CO)C172O)C(CO)C173O)C(CO)C174O)C(CO)C175O)C(CO)C176O)C(CO)C177O)C(CO)C178O)C(CO)C179O)C(CO)C180O)C(CO)C181O)C(CO)C182O)C(CO)C183O)C(CO)C184O)C(CO)C185O)C(CO)C186O)C(CO)C187O)C(CO)C188O)C(CO)C189O)C(CO)C190O)C(CO)C191O)C(CO)C192O)C(CO)C193O)C(CO)C194O)C(CO)C195O)C(CO)C196O)C(CO)C197O)C(CO)C198O)C(CO)C199O)C(CO)C200O)C(CO)C201O)C(CO)C202O)C(CO)C203O)C(CO)C204O)C(CO)C205O)C(CO)C206O)C(CO)C207O)C(CO)C208O)C(CO)C209O)C(CO)C210O)C(CO)C211O)C(CO)C212O)C(CO)C213O)C(CO)C214O)C(CO)C215O)C(CO)C216O)C(CO)C217O)C(CO)C218O)C(CO)C219O)C(CO)C220O)C(CO)C221O)C(CO)C222O)C(CO)C223O)C(CO)C224O)C(CO)C225O)C(CO)C226O)C(CO)C227O)C(CO)C228O)C(CO)C229O)C(CO)C230O)C(CO)C231O)C(CO)C232O)C(CO)C233O)C(CO)C234O)C(CO)C235O)C(CO)C236O)C(CO)C237O)C(CO)C238O)C(CO)C239O)C(CO)C240O)C(CO)C241O)C(CO)C242O)C(CO)C243O)C(CO)C244O)C(CO)C245O)C(CO)C246O)C(CO)C247O)C(CO)C248O)C(CO)C249O)C(CO)C250O)C(CO)C251O)C(CO)C252O)C(CO)C253O)C(CO)C254O)C(CO)C255O)C(CO)C256O)C(CO)C257O)C(CO)C258O)C(CO)C259O)C(CO)C260O)C(CO)C261O)C(CO)C262O)C(CO)C263O)C(CO)C264O)C(CO)C265O)C(CO)C266O)C(CO)C267O)C(CO)C268O)C(CO)C269O)C(CO)C270O)C(CO)C271O)C(CO)C272O)C(CO)C273O)C(CO)C274O)C(CO)C275O)C(CO)C276O)C(CO)C277O)C(CO)C278O)C(CO)C279O)C(CO)C280O)C(CO)C281O)C(CO)C282O)C(CO)C283O)C(CO)C284O)C(CO)C285O)C(CO)C286O)C(CO)C287O)C(CO)C288O)C(CO)C289O)C(CO)C290O)C(CO)C291O)C(CO)C292O)C(CO)C293O)C(CO)C294O)C(CO)C295O)C(CO)C296O)C(CO)C297O)C(CO)C298O)C(CO)C299O)C(CO)C300O)C(CO)C301O)C(CO)C302O)C(CO)C303O)C(CO)C304O)C(CO)C305O)C(CO)C306O)C(CO)C307O)C(CO)C308O)C(CO)C309O)C(CO)C310O)C(CO)C311O)C(CO)C312O)C(CO)C313O)C(CO)C314O)C(CO)C315O)C(CO)C316O)C(CO)C317O)C(CO)C318O)C(CO)C319O)C(CO)C320O)C(CO)C321O)C(CO)C322O)C(CO)C323O)C(CO)C324O)C(CO)C325O)C(CO)C326O)C(CO)C327O)C(CO)C328O)C(CO)C329O)C(CO)C330O)C(CO)C331O)C(CO)C332O)C(CO)C333O)C(CO)C334O)C(CO)C335O)C(CO)C336O)C(CO)C337O)C(CO)C338O)C(CO)C339O)C(CO)C340O)C(CO)C341O)C(CO)C342O)C(CO)C343O)C(CO)C344O)C(CO)C345O)C(CO)C346O)C(CO)C347O)C(CO)C348O)C(CO)C349O)C(CO)C350O)C(CO)C351O)C(CO)C352O)C(CO)C353O)C(CO)C354O)C(CO)C355O)C(CO)C356O)C(CO)C357O)C(CO)C358O)C(CO)C359O)C(CO)C360O)C(CO)C361O)C(CO)C362O)C(CO)C363O)C(CO)C364O)C(CO)C365O)C(CO)C366O)C(CO)C367O)C(CO)C368O)C(CO)C369O)C(CO)C370O)C(CO)C371O)C(CO)C372O)C(CO)C373O)C(CO)C374O)C(CO)C375O)C(CO)C376O)C(CO)C377O)C(CO)C378O)C(CO)C379O)C(CO)C380O)C(CO)C381O)C(CO)C382O)C(CO)C383O)C(CO)C384O)C(CO)C385O)C(CO)C386O)C(CO)C387O)C(CO)C388O)C(CO)C389O)C(CO)C390O)C(CO)C391O)C(CO)C392O)C(CO)C393O)C(CO)C394O)C(CO)C395O)C(CO)C396O)C(CO)C397O)C(CO)C398O)C(CO)C399O)C(CO)C400O)C(CO)C401O)C(CO)C402O)C(CO)C403O)C(CO)C404O)C(CO)C405O) |
|-----|-------|-----------|------------------------------------|--------|-----------|-----------|--------|-----------------------------|--------------------------------------------------------------------------------------------------------------------------------------------------------------------------------------------------------------------------------------------------------------------------------------------------------------------------------------------------------------------------------------------------------------------------------------------------------------------------------------------------------------------------------------------------------------------------------------------------------------------------------------------------------------------------------------------------------------------------------------------------------------------------------------------------------------------------------------------------------------------------------------------------------------------------------------------------------------------------------------------------------------------------------------------------------------------------------------------------------------------------------------------------------------------------------------------------------------------------------------------------------------------------------------------------------------------------------------------------------------------------------------------------------------------------------------------------------------------------------------------------------------------------------------------------------------------------------------------------------------------------------------------------------------------------------------------------------------------------------------------------------------------------------------------------------------------------------------------------------------------------------------------------------------------------------------------------------------------------------------------------------------------------------------------------------------------------------------------------------------------------------------------------------------------------------------------------------------------------------------------------------------------------------------------------------------------------------------------------------------------------------------------------------------------------------------------------------------------------------------------------------------------------------------------------------------------------------------------------------------------------------------------------------------------------------------------------------------------------------------------------------------------------------------------------------------------------------------------------------------------------------------------------------------------------------------------------------------------------------------------------------------------------------------------------------------------------------------------------------------------------------------------------------------------------------------------------------------------------------------------------------------------------------------------------------------------------------------------------------------------------------------------------------------------------------------------------------------------------------------------------------------------------------------------------------------------------------------------------------------------------------------------------------------------------------------------------------------------------------------------------------------------------------------------------------------------------------------------------------------------------------------------------------------------------------------------------------------------------------------------------------------------------------------------------------------------------------------------------------------------------------------------------------------------------------------------------------------------------------------------------------------------------------------------------------------------------------------------------------------------------------------------------------------------------------------------------------------------------------------------------------------------------------------------------------------------------|

[illegible]

|     |        |            |                                                                                                                                                  |                    |            |             |                                                  |                              |                                                                                 |
|-----|--------|------------|--------------------------------------------------------------------------------------------------------------------------------------------------|--------------------|------------|-------------|--------------------------------------------------|------------------------------|---------------------------------------------------------------------------------|
| 859 | 2. 007 | 441. 18497 | Gomisin H                                                                                                                                        | [M+H] <sup>+</sup> | 441. 189   | C23R3007    | Hydrolyzable tannins                             | NLJJSPPKWNBDNS-DAOPMWJZSA-N  | OC1=C (OC) C (OC) =CC2=C1C3=C (OC) C (OC) C=C3OC (O) (C) C (C)2                 |
| 860 | 2. 008 | 164. 07065 | Phenylalanine                                                                                                                                    | [M-H] <sup>-</sup> | 164. 0717  | C9H11N02    | Phenylalanine and derivatives                    | COLNVLDHVKWLRT-UHFFFAOYNA-N  | O=C (O) C (N) CC=1C=CC=CC1                                                      |
| 861 | 2. 011 | 311. 13065 | Desloratadine                                                                                                                                    | [M+H] <sup>+</sup> | 311. 13095 | C19H19ClN2  | Benzocycloheptapyridines                         | JAU0IFJMECKXRG1-UHFFFAOYSA-N | C1=CC=2CCC3=CC (=CC=C3C (=C4CNCC4) C2N=C1) C1                                   |
| 862 | 2. 015 | 361. 97177 | 1-Pentanesulfonamide, 1, 1, 2, 2, 3, 3, 4, 4, 5, 5, 5-undecafluoro-N-methyl-                                                                     | [M-H] <sup>-</sup> | 361. 97144 | C6H4F11NO2S | PFSA                                             | BKNDZBSSSAGTB-UHFFFAOYSA-N   | O=S (=O) (NC) C (F) (F) C (F) (F) C (F) (F) C (F) (F) F                         |
| 863 | 2. 022 | 279. 01834 | purpurin                                                                                                                                         | [M+H] <sup>+</sup> | 279. 01999 | C23H22O6    | 8-prenylated flavanones                          | QLKSLGRVBGPPG-XODARUQUSA-N   | O=C (OC1C2C=3C (OC2OC1) C) C=CC=C4C (=O) CC (OC43) C=5C=CC=CC5C                 |
| 864 | 2. 027 | 326. 12341 | Acetaminophen glucuronide                                                                                                                        | [M-H] <sup>-</sup> | 326. 12726 | C14H17N08   | Phenolic glycosides                              | IPROLSTVTHAGLE-BYN1DDHOSA-N  | O=C (O) C1OC (OC2=CC=C (N=C (O) C) C=C2) C (O) C (O) C1O                        |
| 865 | 2. 034 | 392. 17993 | 4-methyl-N-(((1S,9aR)-octahydro-1H-quinolizin-1-yl)methyl)-2-phenylthiazole-5-carboxamide                                                        | [M+H] <sup>+</sup> | 392. 17999 | C21H27N3O5  | Quinolizines                                     | CDDYZYIBFIQEGM-ZWKOTPCISA-N  | O=C (NCC1CCNCCC(CCC21) C=3SC (=NC3) C=4C=CC=CC4                                 |
| 866 | 2. 059 | 115. 00298 | FUMARATE                                                                                                                                         | [M-H] <sup>-</sup> | 115. 003   | C4H4O4      | Dicarboxylic acids and derivatives               | VZCYOOQTPQCHFL-UHFFFAOYSA-N  | O=C (O) C=CC (=O) O                                                             |
| 867 | 2. 066 | 319. 98358 | PFSM-carboxylic_acid                                                                                                                             | [M-H] <sup>-</sup> | 319. 98331 | C6H6F7N04S  | PFSA                                             | QXQNEIFHTSUFRRH-UHFFFAOYSA-N | O=C (O) CN (C) S (=O) (=O) C (F) (F) C (F) (F) F                                |
| 868 | 2. 072 | 100. 07543 | 2-Piperidone                                                                                                                                     | [M+H] <sup>+</sup> | 100. 0757  | C5H9NO      | Piperidinones                                    | XUHWAMWETGRKB-UHFFFAOYSA-N   | C1CCN=C (C1) O                                                                  |
| 869 | 2. 079 | 311. 12274 | gamma-Glutamyltyrosine                                                                                                                           | [M+H] <sup>+</sup> | 311. 12375 | C14H18N2O6  | Tyrosine and derivatives                         | VVLXCVSSLPQDS-UHFFFAOYNA-N   | O=C (O) C (N=C (O) CCC (N) C (=O) O) CC1=C=C=C (O) C=C1                         |
| 870 | 2. 081 | 278. 15903 | 1-(1-hydroxybutyl)-1, 3, 4, 5, 6, 7-hexahydro-2-benzofuran-4, 5, 6, 7-tetrol                                                                     | [M+H] <sup>+</sup> | 278. 15979 | C12H20O6    | Isobenzofurans                                   | TWDKEWYUIMHMA-UHFFFAOYSA-N   | OC1C2=C (C (O) C (O) C1O) C (OC2) C (O) CCC                                     |
| 871 | 2. 084 | 254. 16238 | Anabasamine                                                                                                                                      | [M+H] <sup>+</sup> | 254. 16518 | C16H19N3    | Alkaloids                                        | TZROBHMKTWECOV-UHFFFAOYNA-N  | CN1CCCCC1C1=CN=C (C=C1) C1=CN=CC=C1                                             |
| 872 | 2. 116 | 443. 19943 | pomiferin                                                                                                                                        | [M+H] <sup>+</sup> | 443. 2012  | C25H24O6    | 6-prenylated isoflavonones                       | GHCZYXUOYFOXP-UHFFFAOYSA-N   | O=C1C (=CC=2C=3C=CC (OC3C (=C (O) C12) CC=C (C) C) (C) C) C=4C=C (O) C=C (O) C4 |
| 873 | 2. 118 | 204. 12241 | O-Acetyl-L-carnitine                                                                                                                             | [M+H] <sup>+</sup> | 204. 12248 | C9H18N04    | Acyl carnitines                                  | RDHQFKQ1GNGIED-MRVPVSSYSA-O  | CC (=O) O [C=H] (CC (O) =O) C [N+] (C) (C) C                                    |
| 874 | 2. 124 | 128. 14313 | DL-Coniine                                                                                                                                       | [M+H] <sup>+</sup> | 128. 14337 | C8H17N      | Alkaloids and derivatives                        | NDNUANOUZGGEPO-UHFFFAOYNA-N  | CCCC1CCCCN1                                                                     |
| 875 | 2. 133 | 225. 09425 | 3-(4-hydroxyphenyl)-1-phenyl-2-propen-1-one                                                                                                      | [M+H] <sup>+</sup> | 225. 09    | C15H12O2    | Retrochalcones                                   | PWCDTYUYPOAUT-DHZZHJOJOSA-N  | O=C (C=C=C1=CC=C (O) C=C1) C=2C=CC=CC2                                          |
| 876 | 2. 136 | 281. 14859 | (5R)-trans-1, 7-diphenyl-5-hydroxy-6-hepten-3-one                                                                                                | [M+H] <sup>+</sup> | 281. 14999 | C19H20O2    | Linear diarylheptanoids                          | NEQQOKAPXXESR-YLZCUGDYSA-N   | O=C (CCC=1C=C=CC1) CC (O) C=CC=2C=CC=CC2                                        |
| 877 | 2. 146 | 174. 02158 | Orthanilic acid                                                                                                                                  | [M+H] <sup>+</sup> | 174. 02194 | C6H7N03S    | Benzenesulfonic acids and derivatives            | ZMCHSEMPFKYNSKA-UHFFFAOYSA-N | O=S (=O) (O) C=1C=CC=CC1N                                                       |
| 878 | 2. 163 | 307. 09982 | mollugin                                                                                                                                         | [M+H] <sup>+</sup> | 307. 10001 | C17H16O4    | Naphthopyrans                                    | VLGATXOTCNBWT-UHFFFAOYSA-N   | O=C (OC) C=1C (O) =C2C=CC=CC2=C3OC (C=CC31) (C) C                               |
| 879 | 2. 169 | 342. 13794 | Feruloyl O-methyldehydrodopamine                                                                                                                 | [M+H] <sup>+</sup> | 342. 13489 | C19H19N05   | Ferulic acid and derivatives                     | IQGMSXKRPLDGB-CFSCNVPRSA-N   | COC1=CC (\C=C\N) C (=O) \C=C\C2=CC=C (O) C (OC) (=C2) =CC=C1O                   |
| 880 | 2. 171 | 196. 09621 | Methyltyrosinate                                                                                                                                 | [M+H] <sup>+</sup> | 196. 09682 | C10H13N03   | Tyrosine and derivatives                         | MRZPEN1JLWBSY-UHFFFAOYNA-N   | O=C (OC) C (N) CC1=CC=C (O) C=C1                                                |
| 881 | 2. 185 | 392. 18021 | Corydaline                                                                                                                                       | [M+H] <sup>+</sup> | 392. 17999 | C22H27N04   | Protoberberine alkaloids and derivatives         | HRXRLJTYQVQHC-QUXALOBESA-N   | O (C1=CC=C2C (=C1OC) CN3CCC4=CC (OC) =C (OC) C=C4C3CC2) C                       |
| 882 | 2. 192 | 323. 12186 | Neobavaisoflavone                                                                                                                                | [M+H] <sup>+</sup> | 323. 12    | C20H18O4    | Isoflavones                                      | OBGPEBYHGIUFBN-UHFFFAOYSA-N  | O=C1C (=CC2=CC (O) =CC=C12) C=3C=CC (O) =C (C3) CC=C (C) C                      |
| 883 | 2. 206 | 261. 0932  | FARNESOL                                                                                                                                         | [M+H] <sup>+</sup> | 261. 09418 | C15H26O     | Sesquiterpenoids                                 | CRDAMVZIKSXFV-YFVJMTDSA-N    | CCC=C (C) CCC=C (C) CCC=C (C) C                                                 |
| 884 | 2. 223 | 422. 21112 | (S)-2-(3-(2, 5-dimethyl-1H-pyrrol-1-yl)propanoyl)-6, 7-dimethoxy-N-methyl-1, 2, 3, 4-tetrahydroisoquinoline-3-carboxamide                        | [M+H] <sup>+</sup> | 422. 20999 | C22H29N3O4  | Alpha amino acid amides                          | OAPHWZYGAPFW-SHVURJRSA-N     | O=C (NC) C1N (C (=O) CCN2C (=CC=C2) C) CC3=CC (OC) =C (OC) C=C3C1               |
| 885 | 2. 227 | 539. 28168 | MUPIROCIN                                                                                                                                        | [M+H] <sup>+</sup> | 539. 28137 | C26H44O9    | Medium-chain fatty acids                         | MINDHHQZYEEK-HBBNESRPSA-N    | O=C (O) CCCCCCCCC (=O) C=C (O) CC1CCC (CC2OC2) C (O) C (O) C1O                  |
| 886 | 2. 23  | 453. 19492 | (1R,5S)-3-(1-oxo-2-(pyridin-4-ylmethyl)-1, 2-dihydroisoquinoline-4-carbonyl)-3, 4, 5, 6-tetrahydro-1H-1, 5-methanonpyrido[1, 2-a][1, 5]diazocin- | [M+H] <sup>+</sup> | 453. 19    | C27H24N4O3  | Cytisine and derivatives                         | HR1XOCFMOJEHEU-UXHICEINSA-N  | O=C1C=CC=C2N1CC3CN (C (=O) C4=CN (C (=O) C=5C=CC=CC54) CC=6C=CN=CC6) CC2C3      |
| 887 | 2. 235 | 395. 20108 | brucine                                                                                                                                          | [M+H] <sup>+</sup> | 395. 20001 | C23H26N2O4  | Strychnos alkaloids                              | RRKTZK1UPZVBMF-IBTVXLQLSA-N  | O=C1CN2C=CC (OC) =C (OC) C=C3C4SCCN6C7=CCOC (C) C (C7CC64) C25                  |
| 888 | 2. 242 | 307. 16434 | Epigallocatechin                                                                                                                                 | [M+H] <sup>+</sup> | 307. 16379 | C15H14O7    | Epigallocatechins                                | XMOCLSLCDHWDHP-IUODEQHRSA-N  | OC=1C=C (O) C2=C (OC (C3=CC (O) =C (O) C (O) =C3) C (O) C2) C1                  |
| 889 | 2. 243 | 240. 17947 | Benzphetamine                                                                                                                                    | [M+H] <sup>+</sup> | 240. 17468 | C17H21N     | Amphetamines and derivatives                     | YXKTVDFXDRQTKV-UHFFFAOYNA-N  | C=1C=CC (=CC1) CN (C) C (C) CC=2C=CC=CC2                                        |
| 890 | 2. 243 | 195. 12186 | Octyl acetate                                                                                                                                    | [M+H] <sup>+</sup> | 195. 13    | C10H20O2    | Fatty alcohol esters                             | YLYBTZ1QSIWLI-UHFFFAOYSA-N   | O=C (OCCCCCCC) C                                                                |
| 891 | 2. 247 | 272. 15967 | Napropamid                                                                                                                                       | [M+H] <sup>+</sup> | 272. 16449 | C17H21N02   | Naphthalenes                                     | WXVAROIGSPCFJ-UHFFFAOYNA-N   | CCN (CC) C (=O) C (C) OC1=CC=CC=CC=C12                                          |
| 892 | 2. 248 | 368. 09482 | 6, 10a-dihydroxy-4-(hydroxymethyl)-4, 7, 11b-trimethyl-1, 2, 3, 4a, 5, 6, 6a, 7, 11, 11a-decahydronaphtho[2, 1-f][1]benzofuran-9-one             | [M+H] <sup>+</sup> | 368. 09167 | C20H30O5    | Naphthofurans                                    | LLK1VVHUJOPYIV-UHFFFAOYSA-N  | O=C1OC2 (O) C (=C1) C (C) C3C (O) CC4C (CO) CCCC4 (C) C3C2                      |
| 893 | 2. 249 | 420. 17572 | 4-amino-5-(5-hydroxy-2, 6-dimethyl-5'-prop-1-en-2'-ylspiro[7'-oxabicyclo[4. 1. 0]heptane-3, 1'-cyclooctan]-2-yl)oxy-5-oxononanoic acid           | [M+H] <sup>+</sup> | 420. 17828 | C20H31N06   | Glutamic acid and derivatives                    | RWFZYEB1QUWPE-UHFFFAOYSA-N   | O=C (O) CCC (N) C (=O) OC1C2OC (C) (O) CC13C (C=C) C) CCC3C                     |
| 894 | 2. 258 | 331. 19727 | 2', 4-Dihydroxy-3, 4', 6' -Triamethoxychalcone                                                                                                   | [M+H] <sup>+</sup> | 331. 19855 | C18H18O6    | 2'-Hydroxychalcones                              | BXXKRESPUMTEI-FNORWQMLSA-N   | O=C (C=CC1=CC=C (O) C (OC) =C1) C=2C (O) =CC (OC) =CC2OC                        |
| 895 | 2. 258 | 158. 08086 | Acetylproline                                                                                                                                    | [M+H] <sup>+</sup> | 158. 0816  | C7H11N03    | Amino acids                                      | GMMSLDIYJOSUSW-UHFFFAOYNA-N  | O=C (O) C1N (C (=O) C) CCC1                                                     |
| 896 | 2. 264 | 378. 16501 | Droperidol                                                                                                                                       | [M-H] <sup>-</sup> | 378. 16232 | C22H22FN3O2 | Alkyl-phenylketones                              | RMEDXOLNCUSCGS-UHFFFAOYSA-N  | O=C (C1=CC=C (F) C=C1) CCCN2CC=C (N3C (O) =NC=4C=CC=CC43) CC2                   |
| 897 | 2. 269 | 127. 0396  | 4-Hydroxy-6-methyl-2-pyrone                                                                                                                      | [M+H] <sup>+</sup> | 127. 03897 | C6H6O3      | Pyranones and derivatives                        | NSYSMSYQPLSPOD-UHFFFAOYSA-N  | O=C1OC (=CC1) C                                                                 |
| 898 | 2. 271 | 131. 03413 | Glutaric acid                                                                                                                                    | [M-H] <sup>-</sup> | 131. 03499 | C5H8O4      | Dicarboxylic acids and derivatives               | JFCQEDHGNZCLN-UHFFFAOYSA-N   | OC (=O) CCCC (O) =O                                                             |
| 899 | 2. 273 | 218. 10214 | D-(+)-Pantothenic acid                                                                                                                           | [M-H] <sup>-</sup> | 218. 10339 | C9H17N05    | Secondary alcohols                               | GHOXGWTUJJEAGQ-ZETCQYMHSA-N  | CC (C) (CO) [C=H] (O) C (O) =NCCC (O) =O                                        |
| 900 | 2. 274 | 260. 11197 | (Z)-2-methyl-4-[ (2R, 3R, 4S, 5S, 6R)-3, 4, 5-trihydroxy-6-(hydroxymethyl)oxan-2-yl]oxybut-2-enenitrile                                          | [M+H] <sup>+</sup> | 260. 11285 | C11H17N06   | Fatty acyl glycosides of mono- and disaccharides | ZMELG1PFIWPHX-GMLQCYRESA-N   | N#CC (=CCOC1OC (CO) C (O) C (O) C1O) C                                          |
| 901 | 2. 279 | 267. 133   | honokiol                                                                                                                                         | [M+H] <sup>+</sup> | 267. 14001 | C18H18O2    | Biphenyls and derivatives                        | FVYX1JYOAQAIQK-UHFFFAOYSA-N  | OC1=CC=C (C=C1C2=CC=CC (O) =C (C2) CC=C) CC=C                                   |

|     |        |            |                                                                                                                                                                                                                                                                                                                                                                                                                                                                                                                                                                                                                                                                                                                                                                                                                                                                                                                                                                                                                                                                                                                                                                                                                                                                                                                                                                                                                                                                                                                                                                                                                                                                                                                                                                                                                                                                                                                                                                                                                                                                                                                                                                                                                                                                                                                                                                                                                                                                                                                                                                                                                                                                                                                                                                                                                                                                                                                                                                                                                                                                                                                                                                                                                                                                                                                                                                                                                                                                                                                                                                                                                                                                                                                                                                                                                                                                                                                                                                                                                                                                                                                                                                                                                                                                                                                                                                                                                                                                                                                                                                                                                                                                                                                                                                                                                                                                                                                                                                                                                                                                                                                                                                                                                                                                                                                                                                                                                                                                                                                                                                                                                                                                                                                                                                                                                                                                                                                                                                                                                                                                                                                                                                                                                                                                                                                                                                                                                                                                                                                                                                                                                                                                                                                                                                                                                                                                                                                                                                                                                                                                                                                                                                                                                                                                                                                                                                                                                                                                                                                                                                                                                                                                                                                                                                                                                                                                                                                                                                                                                                                                                                                                                                                                                                                                                                                                                                                                                                                                                                                                                                                                                                                                                                                                                                                                                                                                                                                                                                                                                                                                                                                                                                                                                                                                                                                                                                                                                                                                                                                                                                                                                                                                                                                                                                                                                                                                                                                                                                                                                                                                                                                                                                                                                                                                                                                                                                                                                                                                                                                                                                                                                                                                                                                                                                                                                                                                                                                                                                                                                                                                                                                                                                                                                                                                                                                                                                                                                                                                                                                                                                                                                                                                                                                                                                                                                                                                                                                                                                                                                                                                                                                                                                                                                                                                                                                                                                                                                                                                                                                                                                                                                                                                                                                                                                                                                                                                                                                           |                    |            |            |                      |                             |                                                          |
|-----|--------|------------|---------------------------------------------------------------------------------------------------------------------------------------------------------------------------------------------------------------------------------------------------------------------------------------------------------------------------------------------------------------------------------------------------------------------------------------------------------------------------------------------------------------------------------------------------------------------------------------------------------------------------------------------------------------------------------------------------------------------------------------------------------------------------------------------------------------------------------------------------------------------------------------------------------------------------------------------------------------------------------------------------------------------------------------------------------------------------------------------------------------------------------------------------------------------------------------------------------------------------------------------------------------------------------------------------------------------------------------------------------------------------------------------------------------------------------------------------------------------------------------------------------------------------------------------------------------------------------------------------------------------------------------------------------------------------------------------------------------------------------------------------------------------------------------------------------------------------------------------------------------------------------------------------------------------------------------------------------------------------------------------------------------------------------------------------------------------------------------------------------------------------------------------------------------------------------------------------------------------------------------------------------------------------------------------------------------------------------------------------------------------------------------------------------------------------------------------------------------------------------------------------------------------------------------------------------------------------------------------------------------------------------------------------------------------------------------------------------------------------------------------------------------------------------------------------------------------------------------------------------------------------------------------------------------------------------------------------------------------------------------------------------------------------------------------------------------------------------------------------------------------------------------------------------------------------------------------------------------------------------------------------------------------------------------------------------------------------------------------------------------------------------------------------------------------------------------------------------------------------------------------------------------------------------------------------------------------------------------------------------------------------------------------------------------------------------------------------------------------------------------------------------------------------------------------------------------------------------------------------------------------------------------------------------------------------------------------------------------------------------------------------------------------------------------------------------------------------------------------------------------------------------------------------------------------------------------------------------------------------------------------------------------------------------------------------------------------------------------------------------------------------------------------------------------------------------------------------------------------------------------------------------------------------------------------------------------------------------------------------------------------------------------------------------------------------------------------------------------------------------------------------------------------------------------------------------------------------------------------------------------------------------------------------------------------------------------------------------------------------------------------------------------------------------------------------------------------------------------------------------------------------------------------------------------------------------------------------------------------------------------------------------------------------------------------------------------------------------------------------------------------------------------------------------------------------------------------------------------------------------------------------------------------------------------------------------------------------------------------------------------------------------------------------------------------------------------------------------------------------------------------------------------------------------------------------------------------------------------------------------------------------------------------------------------------------------------------------------------------------------------------------------------------------------------------------------------------------------------------------------------------------------------------------------------------------------------------------------------------------------------------------------------------------------------------------------------------------------------------------------------------------------------------------------------------------------------------------------------------------------------------------------------------------------------------------------------------------------------------------------------------------------------------------------------------------------------------------------------------------------------------------------------------------------------------------------------------------------------------------------------------------------------------------------------------------------------------------------------------------------------------------------------------------------------------------------------------------------------------------------------------------------------------------------------------------------------------------------------------------------------------------------------------------------------------------------------------------------------------------------------------------------------------------------------------------------------------------------------------------------------------------------------------------------------------------------------------------------------------------------------------------------------------------------------------------------------------------------------------------------------------------------------------------------------------------------------------------------------------------------------------------------------------------------------------------------------------------------------------------------------------------------------------------------------------------------------------------------------------------------------------------------------------------------------------------------------------------------------------------------------------------------------------------------------------------------------------------------------------------------------------------------------------------------------------------------------------------------------------------------------------------------------------------------------------------------------------------------------------------------------------------------------------------------------------------------------------------------------------------------------------------------------------------------------------------------------------------------------------------------------------------------------------------------------------------------------------------------------------------------------------------------------------------------------------------------------------------------------------------------------------------------------------------------------------------------------------------------------------------------------------------------------------------------------------------------------------------------------------------------------------------------------------------------------------------------------------------------------------------------------------------------------------------------------------------------------------------------------------------------------------------------------------------------------------------------------------------------------------------------------------------------------------------------------------------------------------------------------------------------------------------------------------------------------------------------------------------------------------------------------------------------------------------------------------------------------------------------------------------------------------------------------------------------------------------------------------------------------------------------------------------------------------------------------------------------------------------------------------------------------------------------------------------------------------------------------------------------------------------------------------------------------------------------------------------------------------------------------------------------------------------------------------------------------------------------------------------------------------------------------------------------------------------------------------------------------------------------------------------------------------------------------------------------------------------------------------------------------------------------------------------------------------------------------------------------------------------------------------------------------------------------------------------------------------------------------------------------------------------------------------------------------------------------------------------------------------------------------------------------------------------------------------------------------------------------------------------------------------------------------------------------------------------------------------------------------------------------------------------------------------------------------------------------------------------------------------------------------------------------------------------------------------------------------------------------------------------------------------------------------------------------------------------------------------------------------------------------------------------------------------------------------------------------------------------------------------------------------------------------------------------------------------------------------------------------------------------------------------------------------------------------------------------------------------------------------------------------------------------------------------------------------------------------------------------------------------------------------------------------------------------------------------------------------------------------------------------------------------------------------------------------------------------------------------------------------------------------------------------------------------------------------------------------------------------------------------------------------------------------------------------------------------------------------------------|--------------------|------------|------------|----------------------|-----------------------------|----------------------------------------------------------|
| 902 | 2. 279 | 290. 17026 | Hyoscyamine                                                                                                                                                                                                                                                                                                                                                                                                                                                                                                                                                                                                                                                                                                                                                                                                                                                                                                                                                                                                                                                                                                                                                                                                                                                                                                                                                                                                                                                                                                                                                                                                                                                                                                                                                                                                                                                                                                                                                                                                                                                                                                                                                                                                                                                                                                                                                                                                                                                                                                                                                                                                                                                                                                                                                                                                                                                                                                                                                                                                                                                                                                                                                                                                                                                                                                                                                                                                                                                                                                                                                                                                                                                                                                                                                                                                                                                                                                                                                                                                                                                                                                                                                                                                                                                                                                                                                                                                                                                                                                                                                                                                                                                                                                                                                                                                                                                                                                                                                                                                                                                                                                                                                                                                                                                                                                                                                                                                                                                                                                                                                                                                                                                                                                                                                                                                                                                                                                                                                                                                                                                                                                                                                                                                                                                                                                                                                                                                                                                                                                                                                                                                                                                                                                                                                                                                                                                                                                                                                                                                                                                                                                                                                                                                                                                                                                                                                                                                                                                                                                                                                                                                                                                                                                                                                                                                                                                                                                                                                                                                                                                                                                                                                                                                                                                                                                                                                                                                                                                                                                                                                                                                                                                                                                                                                                                                                                                                                                                                                                                                                                                                                                                                                                                                                                                                                                                                                                                                                                                                                                                                                                                                                                                                                                                                                                                                                                                                                                                                                                                                                                                                                                                                                                                                                                                                                                                                                                                                                                                                                                                                                                                                                                                                                                                                                                                                                                                                                                                                                                                                                                                                                                                                                                                                                                                                                                                                                                                                                                                                                                                                                                                                                                                                                                                                                                                                                                                                                                                                                                                                                                                                                                                                                                                                                                                                                                                                                                                                                                                                                                                                                                                                                                                                                                                                                                                                                                                                                                               | [M+] <sup>+</sup>  | 290. 17001 | C17H23N03  | Tropane alkaloids    | RKUNBYITZUJHSG-LGGPCSOHSA-N | O=C (OC1CC2N (C) C (CC2) C1) C (C=3C=CC-CC3) CO          |
| 903 | 2. 284 | 281. 09781 | 1, 5, 9-trihydroxy-5, 7, 7-trimethyl-4, 5a, 6, 8, 8a, 9-hexahydro-1H-azulenol[5, 6-c]furan-3-one                                                                                                                                                                                                                                                                                                                                                                                                                                                                                                                                                                                                                                                                                                                                                                                                                                                                                                                                                                                                                                                                                                                                                                                                                                                                                                                                                                                                                                                                                                                                                                                                                                                                                                                                                                                                                                                                                                                                                                                                                                                                                                                                                                                                                                                                                                                                                                                                                                                                                                                                                                                                                                                                                                                                                                                                                                                                                                                                                                                                                                                                                                                                                                                                                                                                                                                                                                                                                                                                                                                                                                                                                                                                                                                                                                                                                                                                                                                                                                                                                                                                                                                                                                                                                                                                                                                                                                                                                                                                                                                                                                                                                                                                                                                                                                                                                                                                                                                                                                                                                                                                                                                                                                                                                                                                                                                                                                                                                                                                                                                                                                                                                                                                                                                                                                                                                                                                                                                                                                                                                                                                                                                                                                                                                                                                                                                                                                                                                                                                                                                                                                                                                                                                                                                                                                                                                                                                                                                                                                                                                                                                                                                                                                                                                                                                                                                                                                                                                                                                                                                                                                                                                                                                                                                                                                                                                                                                                                                                                                                                                                                                                                                                                                                                                                                                                                                                                                                                                                                                                                                                                                                                                                                                                                                                                                                                                                                                                                                                                                                                                                                                                                                                                                                                                                                                                                                                                                                                                                                                                                                                                                                                                                                                                                                                                                                                                                                                                                                                                                                                                                                                                                                                                                                                                                                                                                                                                                                                                                                                                                                                                                                                                                                                                                                                                                                                                                                                                                                                                                                                                                                                                                                                                                                                                                                                                                                                                                                                                                                                                                                                                                                                                                                                                                                                                                                                                                                                                                                                                                                                                                                                                                                                                                                                                                                                                                                                                                                                                                                                                                                                                                                                                                                                                                                                                                                                                          | [M-H] <sup>-</sup> | 281. 09555 | C15H22O5   | Terpene lactones     | MMDNQAVYQDZQ1-UHFFFAOYSA-N  | O=C1OC (O) C2=C1CC (O) (C) C3CC (C) (C) CC3C2O           |
| 904 | 2. 29  | 233. 14841 | Threonylleucine (isomer of 809, 926)                                                                                                                                                                                                                                                                                                                                                                                                                                                                                                                                                                                                                                                                                                                                                                                                                                                                                                                                                                                                                                                                                                                                                                                                                                                                                                                                                                                                                                                                                                                                                                                                                                                                                                                                                                                                                                                                                                                                                                                                                                                                                                                                                                                                                                                                                                                                                                                                                                                                                                                                                                                                                                                                                                                                                                                                                                                                                                                                                                                                                                                                                                                                                                                                                                                                                                                                                                                                                                                                                                                                                                                                                                                                                                                                                                                                                                                                                                                                                                                                                                                                                                                                                                                                                                                                                                                                                                                                                                                                                                                                                                                                                                                                                                                                                                                                                                                                                                                                                                                                                                                                                                                                                                                                                                                                                                                                                                                                                                                                                                                                                                                                                                                                                                                                                                                                                                                                                                                                                                                                                                                                                                                                                                                                                                                                                                                                                                                                                                                                                                                                                                                                                                                                                                                                                                                                                                                                                                                                                                                                                                                                                                                                                                                                                                                                                                                                                                                                                                                                                                                                                                                                                                                                                                                                                                                                                                                                                                                                                                                                                                                                                                                                                                                                                                                                                                                                                                                                                                                                                                                                                                                                                                                                                                                                                                                                                                                                                                                                                                                                                                                                                                                                                                                                                                                                                                                                                                                                                                                                                                                                                                                                                                                                                                                                                                                                                                                                                                                                                                                                                                                                                                                                                                                                                                                                                                                                                                                                                                                                                                                                                                                                                                                                                                                                                                                                                                                                                                                                                                                                                                                                                                                                                                                                                                                                                                                                                                                                                                                                                                                                                                                                                                                                                                                                                                                                                                                                                                                                                                                                                                                                                                                                                                                                                                                                                                                                                                                                                                                                                                                                                                                                                                                                                                                                                                                                                                                                                      | [M+] <sup>+</sup>  | 233. 151   | C10H20N2O4 | Dipeptides           | BQBCEBCLXBKYHW-UHFFFAOYNA-N | O=C (O) C (NC (=O) C (N) C (O) C) CC (O) C               |
| 905 | 2. 292 | 378. 9436  | 7-Chloro-perfluoroheptanoic acid                                                                                                                                                                                                                                                                                                                                                                                                                                                                                                                                                                                                                                                                                                                                                                                                                                                                                                                                                                                                                                                                                                                                                                                                                                                                                                                                                                                                                                                                                                                                                                                                                                                                                                                                                                                                                                                                                                                                                                                                                                                                                                                                                                                                                                                                                                                                                                                                                                                                                                                                                                                                                                                                                                                                                                                                                                                                                                                                                                                                                                                                                                                                                                                                                                                                                                                                                                                                                                                                                                                                                                                                                                                                                                                                                                                                                                                                                                                                                                                                                                                                                                                                                                                                                                                                                                                                                                                                                                                                                                                                                                                                                                                                                                                                                                                                                                                                                                                                                                                                                                                                                                                                                                                                                                                                                                                                                                                                                                                                                                                                                                                                                                                                                                                                                                                                                                                                                                                                                                                                                                                                                                                                                                                                                                                                                                                                                                                                                                                                                                                                                                                                                                                                                                                                                                                                                                                                                                                                                                                                                                                                                                                                                                                                                                                                                                                                                                                                                                                                                                                                                                                                                                                                                                                                                                                                                                                                                                                                                                                                                                                                                                                                                                                                                                                                                                                                                                                                                                                                                                                                                                                                                                                                                                                                                                                                                                                                                                                                                                                                                                                                                                                                                                                                                                                                                                                                                                                                                                                                                                                                                                                                                                                                                                                                                                                                                                                                                                                                                                                                                                                                                                                                                                                                                                                                                                                                                                                                                                                                                                                                                                                                                                                                                                                                                                                                                                                                                                                                                                                                                                                                                                                                                                                                                                                                                                                                                                                                                                                                                                                                                                                                                                                                                                                                                                                                                                                                                                                                                                                                                                                                                                                                                                                                                                                                                                                                                                                                                                                                                                                                                                                                                                                                                                                                                                                                                                                                                          | [M-H] <sup>-</sup> | 378. 94006 | C7HClF12O2 | PFSA                 | WMFYUM1VMSLSX-UHFFFAOYSA-N  | O=C (O) C (F) (F) C (F) (F) C (F) (F) C (F) C (F) (F) C1 |
| 906 | 2. 292 | 342. 96674 | FT-sulfonic acid                                                                                                                                                                                                                                                                                                                                                                                                                                                                                                                                                                                                                                                                                                                                                                                                                                                                                                                                                                                                                                                                                                                                                                                                                                                                                                                                                                                                                                                                                                                                                                                                                                                                                                                                                                                                                                                                                                                                                                                                                                                                                                                                                                                                                                                                                                                                                                                                                                                                                                                                                                                                                                                                                                                                                                                                                                                                                                                                                                                                                                                                                                                                                                                                                                                                                                                                                                                                                                                                                                                                                                                                                                                                                                                                                                                                                                                                                                                                                                                                                                                                                                                                                                                                                                                                                                                                                                                                                                                                                                                                                                                                                                                                                                                                                                                                                                                                                                                                                                                                                                                                                                                                                                                                                                                                                                                                                                                                                                                                                                                                                                                                                                                                                                                                                                                                                                                                                                                                                                                                                                                                                                                                                                                                                                                                                                                                                                                                                                                                                                                                                                                                                                                                                                                                                                                                                                                                                                                                                                                                                                                                                                                                                                                                                                                                                                                                                                                                                                                                                                                                                                                                                                                                                                                                                                                                                                                                                                                                                                                                                                                                                                                                                                                                                                                                                                                                                                                                                                                                                                                                                                                                                                                                                                                                                                                                                                                                                                                                                                                                                                                                                                                                                                                                                                                                                                                                                                                                                                                                                                                                                                                                                                                                                                                                                                                                                                                                                                                                                                                                                                                                                                                                                                                                                                                                                                                                                                                                                                                                                                                                                                                                                                                                                                                                                                                                                                                                                                                                                                                                                                                                                                                                                                                                                                                                                                                                                                                                                                                                                                                                                                                                                                                                                                                                                                                                                                                                                                                                                                                                                                                                                                                                                                                                                                                                                                                                                                                                                                                                                                                                                                                                                                                                                                                                                                                                                                                                                                          | [M-H] <sup>-</sup> | 342. 96921 | C6H5F9O4S  | PFSA                 | FVJAERWL1COZSD-UHFFFAOYSA-N | O=S (=O) (O) C (O) CC (F) (F) C (F) (F) C (F) C (F) F    |
| 907 | 2. 299 | 140. 07011 | 3-hydroxy-1, 2-dimethylpyridin-4 (1H)-one                                                                                                                                                                                                                                                                                                                                                                                                                                                                                                                                                                                                                                                                                                                                                                                                                                                                                                                                                                                                                                                                                                                                                                                                                                                                                                                                                                                                                                                                                                                                                                                                                                                                                                                                                                                                                                                                                                                                                                                                                                                                                                                                                                                                                                                                                                                                                                                                                                                                                                                                                                                                                                                                                                                                                                                                                                                                                                                                                                                                                                                                                                                                                                                                                                                                                                                                                                                                                                                                                                                                                                                                                                                                                                                                                                                                                                                                                                                                                                                                                                                                                                                                                                                                                                                                                                                                                                                                                                                                                                                                                                                                                                                                                                                                                                                                                                                                                                                                                                                                                                                                                                                                                                                                                                                                                                                                                                                                                                                                                                                                                                                                                                                                                                                                                                                                                                                                                                                                                                                                                                                                                                                                                                                                                                                                                                                                                                                                                                                                                                                                                                                                                                                                                                                                                                                                                                                                                                                                                                                                                                                                                                                                                                                                                                                                                                                                                                                                                                                                                                                                                                                                                                                                                                                                                                                                                                                                                                                                                                                                                                                                                                                                                                                                                                                                                                                                                                                                                                                                                                                                                                                                                                                                                                                                                                                                                                                                                                                                                                                                                                                                                                                                                                                                                                                                                                                                                                                                                                                                                                                                                                                                                                                                                                                                                                                                                                                                                                                                                                                                                                                                                                                                                                                                                                                                                                                                                                                                                                                                                                                                                                                                                                                                                                                                                                                                                                                                                                                                                                                                                                                                                                                                                                                                                                                                                                                                                                                                                                                                                                                                                                                                                                                                                                                                                                                                                                                                                                                                                                                                                                                                                                                                                                                                                                                                                                                                                                                                                                                                                                                                                                                                                                                                                                                                                                                                                                                                                 | [M+] <sup>+</sup>  | 140. 07001 | C7H9NO2    | Methylpyridines      | TXKXOCQBNNJULO-UHFFFAOYSA-N | O=C1C=CN (C (=C1O) C) C                                  |
| 908 | 2. 303 | 203. 138   | Ala-Leu                                                                                                                                                                                                                                                                                                                                                                                                                                                                                                                                                                                                                                                                                                                                                                                                                                                                                                                                                                                                                                                                                                                                                                                                                                                                                                                                                                                                                                                                                                                                                                                                                                                                                                                                                                                                                                                                                                                                                                                                                                                                                                                                                                                                                                                                                                                                                                                                                                                                                                                                                                                                                                                                                                                                                                                                                                                                                                                                                                                                                                                                                                                                                                                                                                                                                                                                                                                                                                                                                                                                                                                                                                                                                                                                                                                                                                                                                                                                                                                                                                                                                                                                                                                                                                                                                                                                                                                                                                                                                                                                                                                                                                                                                                                                                                                                                                                                                                                                                                                                                                                                                                                                                                                                                                                                                                                                                                                                                                                                                                                                                                                                                                                                                                                                                                                                                                                                                                                                                                                                                                                                                                                                                                                                                                                                                                                                                                                                                                                                                                                                                                                                                                                                                                                                                                                                                                                                                                                                                                                                                                                                                                                                                                                                                                                                                                                                                                                                                                                                                                                                                                                                                                                                                                                                                                                                                                                                                                                                                                                                                                                                                                                                                                                                                                                                                                                                                                                                                                                                                                                                                                                                                                                                                                                                                                                                                                                                                                                                                                                                                                                                                                                                                                                                                                                                                                                                                                                                                                                                                                                                                                                                                                                                                                                                                                                                                                                                                                                                                                                                                                                                                                                                                                                                                                                                                                                                                                                                                                                                                                                                                                                                                                                                                                                                                                                                                                                                                                                                                                                                                                                                                                                                                                                                                                                                                                                                                                                                                                                                                                                                                                                                                                                                                                                                                                                                                                                                                                                                                                                                                                                                                                                                                                                                                                                                                                                                                                                                                                                                                                                                                                                                                                                                                                                                                                                                                                                                                                                   | [M+] <sup>+</sup>  | 203. 13902 | C9H18N2O3  | Peptides             | RD1KFPRLVJLMER-UHFFFAOYNA-N | O=C (O) C (N=C (O) C (N) C) CC (O) C                     |
| 909 | 2. 303 | 356. 1192  | Duguetine                                                                                                                                                                                                                                                                                                                                                                                                                                                                                                                                                                                                                                                                                                                                                                                                                                                                                                                                                                                                                                                                                                                                                                                                                                                                                                                                                                                                                                                                                                                                                                                                                                                                                                                                                                                                                                                                                                                                                                                                                                                                                                                                                                                                                                                                                                                                                                                                                                                                                                                                                                                                                                                                                                                                                                                                                                                                                                                                                                                                                                                                                                                                                                                                                                                                                                                                                                                                                                                                                                                                                                                                                                                                                                                                                                                                                                                                                                                                                                                                                                                                                                                                                                                                                                                                                                                                                                                                                                                                                                                                                                                                                                                                                                                                                                                                                                                                                                                                                                                                                                                                                                                                                                                                                                                                                                                                                                                                                                                                                                                                                                                                                                                                                                                                                                                                                                                                                                                                                                                                                                                                                                                                                                                                                                                                                                                                                                                                                                                                                                                                                                                                                                                                                                                                                                                                                                                                                                                                                                                                                                                                                                                                                                                                                                                                                                                                                                                                                                                                                                                                                                                                                                                                                                                                                                                                                                                                                                                                                                                                                                                                                                                                                                                                                                                                                                                                                                                                                                                                                                                                                                                                                                                                                                                                                                                                                                                                                                                                                                                                                                                                                                                                                                                                                                                                                                                                                                                                                                                                                                                                                                                                                                                                                                                                                                                                                                                                                                                                                                                                                                                                                                                                                                                                                                                                                                                                                                                                                                                                                                                                                                                                                                                                                                                                                                                                                                                                                                                                                                                                                                                                                                                                                                                                                                                                                                                                                                                                                                                                                                                                                                                                                                                                                                                                                                                                                                                                                                                                                                                                                                                                                                                                                                                                                                                                                                                                                                                                                                                                                                                                                                                                                                                                                                                                                                                                                                                                                                                 | [M+] <sup>+</sup>  | 356. 117   | C20H21NO5  | Hydroxy-7-aporphines | ZAVWGRCRKSHIMO-OALUTQOASA-N | OC1C2=CC (OC) =C (OC) C=C2C=3C=4OCC4C=C5C3C1N (C) CC5    |
| 910 | 2. 319 | 189. 12254 | Gly-Leu                                                                                                                                                                                                                                                                                                                                                                                                                                                                                                                                                                                                                                                                                                                                                                                                                                                                                                                                                                                                                                                                                                                                                                                                                                                                                                                                                                                                                                                                                                                                                                                                                                                                                                                                                                                                                                                                                                                                                                                                                                                                                                                                                                                                                                                                                                                                                                                                                                                                                                                                                                                                                                                                                                                                                                                                                                                                                                                                                                                                                                                                                                                                                                                                                                                                                                                                                                                                                                                                                                                                                                                                                                                                                                                                                                                                                                                                                                                                                                                                                                                                                                                                                                                                                                                                                                                                                                                                                                                                                                                                                                                                                                                                                                                                                                                                                                                                                                                                                                                                                                                                                                                                                                                                                                                                                                                                                                                                                                                                                                                                                                                                                                                                                                                                                                                                                                                                                                                                                                                                                                                                                                                                                                                                                                                                                                                                                                                                                                                                                                                                                                                                                                                                                                                                                                                                                                                                                                                                                                                                                                                                                                                                                                                                                                                                                                                                                                                                                                                                                                                                                                                                                                                                                                                                                                                                                                                                                                                                                                                                                                                                                                                                                                                                                                                                                                                                                                                                                                                                                                                                                                                                                                                                                                                                                                                                                                                                                                                                                                                                                                                                                                                                                                                                                                                                                                                                                                                                                                                                                                                                                                                                                                                                                                                                                                                                                                                                                                                                                                                                                                                                                                                                                                                                                                                                                                                                                                                                                                                                                                                                                                                                                                                                                                                                                                                                                                                                                                                                                                                                                                                                                                                                                                                                                                                                                                                                                                                                                                                                                                                                                                                                                                                                                                                                                                                                                                                                                                                                                                                                                                                                                                                                                                                                                                                                                                                                                                                                                                                                                                                                                                                                                                                                                                                                                                                                                                                                                                                   | [M+] <sup>+</sup>  | 189. 12337 | C8H16N2O3  | Peptides             | DKEXFJVMVGETOQ-UHFFFAOYNA-N | O=C (O) C (N=C (O) CN) CC (O) C                          |
| 911 | 2. 33  | 393. 11371 | (1R, 2E, 8S, 10R, 11S)-10, 11-dihydroxy-6- (methoxymethyl)-1, 10-dimethyl-5-oxo-4, 14-dioxatriazolo[9, 2, 1, 0P, 2]tetradeca-2, 6-dien-8-yl 2-methylpropan-2-ylidene-2-oxo-3-oxo-4-oxo-5-oxo-6-oxo-7-oxo-8-oxo-9-oxo-10-oxo-11-oxo-12-oxo-13-oxo-14-oxo-15-oxo-16-oxo-17-oxo-18-oxo-19-oxo-20-oxo-21-oxo-22-oxo-23-oxo-24-oxo-25-oxo-26-oxo-27-oxo-28-oxo-29-oxo-30-oxo-31-oxo-32-oxo-33-oxo-34-oxo-35-oxo-36-oxo-37-oxo-38-oxo-39-oxo-40-oxo-41-oxo-42-oxo-43-oxo-44-oxo-45-oxo-46-oxo-47-oxo-48-oxo-49-oxo-50-oxo-51-oxo-52-oxo-53-oxo-54-oxo-55-oxo-56-oxo-57-oxo-58-oxo-59-oxo-60-oxo-61-oxo-62-oxo-63-oxo-64-oxo-65-oxo-66-oxo-67-oxo-68-oxo-69-oxo-70-oxo-71-oxo-72-oxo-73-oxo-74-oxo-75-oxo-76-oxo-77-oxo-78-oxo-79-oxo-80-oxo-81-oxo-82-oxo-83-oxo-84-oxo-85-oxo-86-oxo-87-oxo-88-oxo-89-oxo-90-oxo-91-oxo-92-oxo-93-oxo-94-oxo-95-oxo-96-oxo-97-oxo-98-oxo-99-oxo-100-oxo-101-oxo-102-oxo-103-oxo-104-oxo-105-oxo-106-oxo-107-oxo-108-oxo-109-oxo-110-oxo-111-oxo-112-oxo-113-oxo-114-oxo-115-oxo-116-oxo-117-oxo-118-oxo-119-oxo-120-oxo-121-oxo-122-oxo-123-oxo-124-oxo-125-oxo-126-oxo-127-oxo-128-oxo-129-oxo-130-oxo-131-oxo-132-oxo-133-oxo-134-oxo-135-oxo-136-oxo-137-oxo-138-oxo-139-oxo-140-oxo-141-oxo-142-oxo-143-oxo-144-oxo-145-oxo-146-oxo-147-oxo-148-oxo-149-oxo-150-oxo-151-oxo-152-oxo-153-oxo-154-oxo-155-oxo-156-oxo-157-oxo-158-oxo-159-oxo-160-oxo-161-oxo-162-oxo-163-oxo-164-oxo-165-oxo-166-oxo-167-oxo-168-oxo-169-oxo-170-oxo-171-oxo-172-oxo-173-oxo-174-oxo-175-oxo-176-oxo-177-oxo-178-oxo-179-oxo-180-oxo-181-oxo-182-oxo-183-oxo-184-oxo-185-oxo-186-oxo-187-oxo-188-oxo-189-oxo-190-oxo-191-oxo-192-oxo-193-oxo-194-oxo-195-oxo-196-oxo-197-oxo-198-oxo-199-oxo-200-oxo-201-oxo-202-oxo-203-oxo-204-oxo-205-oxo-206-oxo-207-oxo-208-oxo-209-oxo-210-oxo-211-oxo-212-oxo-213-oxo-214-oxo-215-oxo-216-oxo-217-oxo-218-oxo-219-oxo-220-oxo-221-oxo-222-oxo-223-oxo-224-oxo-225-oxo-226-oxo-227-oxo-228-oxo-229-oxo-230-oxo-231-oxo-232-oxo-233-oxo-234-oxo-235-oxo-236-oxo-237-oxo-238-oxo-239-oxo-240-oxo-241-oxo-242-oxo-243-oxo-244-oxo-245-oxo-246-oxo-247-oxo-248-oxo-249-oxo-250-oxo-251-oxo-252-oxo-253-oxo-254-oxo-255-oxo-256-oxo-257-oxo-258-oxo-259-oxo-260-oxo-261-oxo-262-oxo-263-oxo-264-oxo-265-oxo-266-oxo-267-oxo-268-oxo-269-oxo-270-oxo-271-oxo-272-oxo-273-oxo-274-oxo-275-oxo-276-oxo-277-oxo-278-oxo-279-oxo-280-oxo-281-oxo-282-oxo-283-oxo-284-oxo-285-oxo-286-oxo-287-oxo-288-oxo-289-oxo-290-oxo-291-oxo-292-oxo-293-oxo-294-oxo-295-oxo-296-oxo-297-oxo-298-oxo-299-oxo-300-oxo-301-oxo-302-oxo-303-oxo-304-oxo-305-oxo-306-oxo-307-oxo-308-oxo-309-oxo-310-oxo-311-oxo-312-oxo-313-oxo-314-oxo-315-oxo-316-oxo-317-oxo-318-oxo-319-oxo-320-oxo-321-oxo-322-oxo-323-oxo-324-oxo-325-oxo-326-oxo-327-oxo-328-oxo-329-oxo-330-oxo-331-oxo-332-oxo-333-oxo-334-oxo-335-oxo-336-oxo-337-oxo-338-oxo-339-oxo-340-oxo-341-oxo-342-oxo-343-oxo-344-oxo-345-oxo-346-oxo-347-oxo-348-oxo-349-oxo-350-oxo-351-oxo-352-oxo-353-oxo-354-oxo-355-oxo-356-oxo-357-oxo-358-oxo-359-oxo-360-oxo-361-oxo-362-oxo-363-oxo-364-oxo-365-oxo-366-oxo-367-oxo-368-oxo-369-oxo-370-oxo-371-oxo-372-oxo-373-oxo-374-oxo-375-oxo-376-oxo-377-oxo-378-oxo-379-oxo-380-oxo-381-oxo-382-oxo-383-oxo-384-oxo-385-oxo-386-oxo-387-oxo-388-oxo-389-oxo-390-oxo-391-oxo-392-oxo-393-oxo-394-oxo-395-oxo-396-oxo-397-oxo-398-oxo-399-oxo-400-oxo-401-oxo-402-oxo-403-oxo-404-oxo-405-oxo-406-oxo-407-oxo-408-oxo-409-oxo-410-oxo-411-oxo-412-oxo-413-oxo-414-oxo-415-oxo-416-oxo-417-oxo-418-oxo-419-oxo-420-oxo-421-oxo-422-oxo-423-oxo-424-oxo-425-oxo-426-oxo-427-oxo-428-oxo-429-oxo-430-oxo-431-oxo-432-oxo-433-oxo-434-oxo-435-oxo-436-oxo-437-oxo-438-oxo-439-oxo-440-oxo-441-oxo-442-oxo-443-oxo-444-oxo-445-oxo-446-oxo-447-oxo-448-oxo-449-oxo-450-oxo-451-oxo-452-oxo-453-oxo-454-oxo-455-oxo-456-oxo-457-oxo-458-oxo-459-oxo-460-oxo-461-oxo-462-oxo-463-oxo-464-oxo-465-oxo-466-oxo-467-oxo-468-oxo-469-oxo-470-oxo-471-oxo-472-oxo-473-oxo-474-oxo-475-oxo-476-oxo-477-oxo-478-oxo-479-oxo-480-oxo-481-oxo-482-oxo-483-oxo-484-oxo-485-oxo-486-oxo-487-oxo-488-oxo-489-oxo-490-oxo-491-oxo-492-oxo-493-oxo-494-oxo-495-oxo-496-oxo-497-oxo-498-oxo-499-oxo-500-oxo-501-oxo-502-oxo-503-oxo-504-oxo-505-oxo-506-oxo-507-oxo-508-oxo-509-oxo-510-oxo-511-oxo-512-oxo-513-oxo-514-oxo-515-oxo-516-oxo-517-oxo-518-oxo-519-oxo-520-oxo-521-oxo-522-oxo-523-oxo-524-oxo-525-oxo-526-oxo-527-oxo-528-oxo-529-oxo-530-oxo-531-oxo-532-oxo-533-oxo-534-oxo-535-oxo-536-oxo-537-oxo-538-oxo-539-oxo-540-oxo-541-oxo-542-oxo-543-oxo-544-oxo-545-oxo-546-oxo-547-oxo-548-oxo-549-oxo-550-oxo-551-oxo-552-oxo-553-oxo-554-oxo-555-oxo-556-oxo-557-oxo-558-oxo-559-oxo-560-oxo-561-oxo-562-oxo-563-oxo-564-oxo-565-oxo-566-oxo-567-oxo-568-oxo-569-oxo-570-oxo-571-oxo-572-oxo-573-oxo-574-oxo-575-oxo-576-oxo-577-oxo-578-oxo-579-oxo-580-oxo-581-oxo-582-oxo-583-oxo-584-oxo-585-oxo-586-oxo-587-oxo-588-oxo-589-oxo-590-oxo-591-oxo-592-oxo-593-oxo-594-oxo-595-oxo-596-oxo-597-oxo-598-oxo-599-oxo-600-oxo-601-oxo-602-oxo-603-oxo-604-oxo-605-oxo-606-oxo-607-oxo-608-oxo-609-oxo-610-oxo-611-oxo-612-oxo-613-oxo-614-oxo-615-oxo-616-oxo-617-oxo-618-oxo-619-oxo-620-oxo-621-oxo-622-oxo-623-oxo-624-oxo-625-oxo-626-oxo-627-oxo-628-oxo-629-oxo-630-oxo-631-oxo-632-oxo-633-oxo-634-oxo-635-oxo-636-oxo-637-oxo-638-oxo-639-oxo-640-oxo-641-oxo-642-oxo-643-oxo-644-oxo-645-oxo-646-oxo-647-oxo-648-oxo-649-oxo-650-oxo-651-oxo-652-oxo-653-oxo-654-oxo-655-oxo-656-oxo-657-oxo-658-oxo-659-oxo-660-oxo-661-oxo-662-oxo-663-oxo-664-oxo-665-oxo-666-oxo-667-oxo-668-oxo-669-oxo-670-oxo-671-oxo-672-oxo-673-oxo-674-oxo-675-oxo-676-oxo-677-oxo-678-oxo-679-oxo-680-oxo-681-oxo-682-oxo-683-oxo-684-oxo-685-oxo-686-oxo-687-oxo-688-oxo-689-oxo-690-oxo-691-oxo-692-oxo-693-oxo-694-oxo-695-oxo-696-oxo-697-oxo-698-oxo-699-oxo-700-oxo-701-oxo-702-oxo-703-oxo-704-oxo-705-oxo-706-oxo-707-oxo-708-oxo-709-oxo-710-oxo-711-oxo-712-oxo-713-oxo-714-oxo-715-oxo-716-oxo-717-oxo-718-oxo-719-oxo-720-oxo-721-oxo-722-oxo-723-oxo-724-oxo-725-oxo-726-oxo-727-oxo-728-oxo-729-oxo-730-oxo-731-oxo-732-oxo-733-oxo-734-oxo-735-oxo-736-oxo-737-oxo-738-oxo-739-oxo-740-oxo-741-oxo-742-oxo-743-oxo-744-oxo-745-oxo-746-oxo-747-oxo-748-oxo-749-oxo-750-oxo-751-oxo-752-oxo-753-oxo-754-oxo-755-oxo-756-oxo-757-oxo-758-oxo-759-oxo-760-oxo-761-oxo-762-oxo-763-oxo-764-oxo-765-oxo-766-oxo-767-oxo-768-oxo-769-oxo-770-oxo-771-oxo-772-oxo-773-oxo-774-oxo-775-oxo-776-oxo-777-oxo-778-oxo-779-oxo-780-oxo-781-oxo-782-oxo-783-oxo-784-oxo-785-oxo-786-oxo-787-oxo-788-oxo-789-oxo-790-oxo-791-oxo-792-oxo-793-oxo-794-oxo-795-oxo-796-oxo-797-oxo-798-oxo-799-oxo-800-oxo-801-oxo-802-oxo-803-oxo-804-oxo-805-oxo-806-oxo-807-oxo-808-oxo-809-oxo-810-oxo-811-oxo-812-oxo-813-oxo-814-oxo-815-oxo-816-oxo-817-oxo-818-oxo-819-oxo-820-oxo-821-oxo-822-oxo-823-oxo-824-oxo-825-oxo-826-oxo-827-oxo-828-oxo-829-oxo-830-oxo-831-oxo-832-oxo-833-oxo-834-oxo-835-oxo-836-oxo-837-oxo-838-oxo-839-oxo-840-oxo-841-oxo-842-oxo-843-oxo-844-oxo-845-oxo-846-oxo-847-oxo-848-oxo-849-oxo-850-oxo-851-oxo-852-oxo-853-oxo-854-oxo-855-oxo-856-oxo-857-oxo-858-oxo-859-oxo-860-oxo-861-oxo-862-oxo-863-oxo-864-oxo-865-oxo-866-oxo-867-oxo-868-oxo-869-oxo-870-oxo-871-oxo-872-oxo-873-oxo-874-oxo-875-oxo-876-oxo-877-oxo-878-oxo-879-oxo-880-oxo-881-oxo-882-oxo-883-oxo-884-oxo-885-oxo-886-oxo-887-oxo-888-oxo-889-oxo-890-oxo-891-oxo-892-oxo-893-oxo-894-oxo-895-oxo-896-oxo-897-oxo-898-oxo-899-oxo-900-oxo-901-oxo-902-oxo-903-oxo-904-oxo-905-oxo-906-oxo-907-oxo-908-oxo-909-oxo-910-oxo-911-oxo-912-oxo-913-oxo-914-oxo-915-oxo-916-oxo-917-oxo-918-oxo-919-oxo-920-oxo-921-oxo-922-oxo-923-oxo-924-oxo-925-oxo-926-oxo-927-oxo-928-oxo-929-oxo-930-oxo-931-oxo-932-oxo-933-oxo-934-oxo-935-oxo-936-oxo-937-oxo-938-oxo-939-oxo-940-oxo-941-oxo-942-oxo-943-oxo-944-oxo-945-oxo-946-oxo-947-oxo-948-oxo-949-oxo-950-oxo-951-oxo-952-oxo-953-oxo-954-oxo-955-oxo-956-oxo-957-oxo-958-oxo-959-oxo-960-oxo-961-oxo-962-oxo-963-oxo-964-oxo-965-oxo-966-oxo-967-oxo-968-oxo-969-oxo-970-oxo-971-oxo-972-oxo-973-oxo-974-oxo-975-oxo-976-oxo-977-oxo-978-oxo-979-oxo-980-oxo-981-oxo-982-oxo-983-oxo-984-oxo-985-oxo-986-oxo-987-oxo-988-oxo-989-oxo-990-oxo-991-oxo-992-oxo-993-oxo-994-oxo-995-oxo-996-oxo-997-oxo-998-oxo-999-oxo-1000-oxo-1001-oxo-1002-oxo-1003-oxo-1004-oxo-1005-oxo-1006-oxo-1007-oxo-1008-oxo-1009-oxo-1010-oxo-1011-oxo-1012-oxo-1013-oxo-1014-oxo-1015-oxo-1016-oxo-1017-oxo-1018-oxo-1019-oxo-1020-oxo-1021-oxo-1022-oxo-1023-oxo-1024-oxo-1025-oxo-1026-oxo-1027-oxo-1028-oxo-1029-oxo-1030-oxo-1031-oxo-1032-oxo-1033-oxo-1034-oxo-1035-oxo-1036-oxo-1037-oxo-1038-oxo-1039-oxo-1040-oxo-1041-oxo-1042-oxo-1043-oxo-1044-oxo-1045-oxo-1046-oxo-1047-oxo-1048-oxo-1049-oxo-1050-oxo-1051-oxo-1052-oxo-1053-oxo-1054-oxo-1055-oxo-1056-oxo-1057-oxo-1058-oxo-1059-oxo-1060-oxo-1061-oxo-1062-oxo-1063-oxo-1064-oxo-1065-oxo-1066-oxo-1067-oxo-1068-oxo-1069-oxo-1070-oxo-1071-oxo-1072-oxo-1073-oxo-1074-oxo-1075-oxo-1076-oxo-1077-oxo-1078-oxo-1079-oxo-1080-oxo-1081-oxo-1082-oxo-1083-oxo-1084-oxo-1085-oxo-1086-oxo-1087-oxo-1088-oxo-1089-oxo-1090-oxo-1091-oxo-1092-oxo-1093-oxo-1094-oxo-1095-oxo-1096-oxo-1097-oxo-1098-oxo-1099-oxo-1100-oxo-1101-oxo-1102-oxo-1103-oxo-1104-oxo-1105-oxo-1106-oxo-1107-oxo-1108-oxo-1109-oxo-1110-oxo-1111-oxo-1112-oxo-1113-oxo-1114-oxo-1115-oxo-1116-oxo-1117-oxo-1118-oxo-1119-oxo-1120-oxo-1121-oxo-1122-oxo-1123-oxo-1124-oxo-1125-oxo-1126-oxo-1127-oxo-1128-oxo-1129-oxo-1130-oxo-1131-oxo-1132-oxo-1133-oxo-1134-oxo-1135-oxo-1136-oxo-1137-oxo-1138-oxo-1139-oxo-1140-oxo-1141-oxo-1142-oxo-1143-oxo-1144-oxo-1145-oxo-1146-oxo-1147-oxo-1148-oxo-1149-oxo-1150-oxo-1151-oxo-1152-oxo-1153-oxo-1154-oxo-1155-oxo-1156-oxo-1157-oxo-1158-oxo-1159-oxo-1160-oxo-1161-oxo-1162-oxo-1163-oxo-1164-oxo-1165-oxo-1166-oxo-1167-oxo-1168-oxo-1169-oxo-1170-oxo-1171-oxo-1172-oxo-1173-oxo-1174-oxo-1175-oxo-1176-oxo-1177-oxo-1178-oxo-1179-oxo-1180-oxo-1181-oxo-1182-oxo-1183-oxo-1184-oxo-1185-oxo-1186-oxo-1187-oxo-1188-oxo-1189-oxo-1190-oxo-1191-oxo-1192-oxo-1193-oxo-1194-oxo-1195-oxo-1196-oxo-1197-oxo-1198-oxo-1199-oxo-1200-oxo-1201-oxo-1202-oxo-1203-oxo-1204-oxo-1205-oxo-1206-oxo-1207-oxo-1208-oxo-1209-oxo-1210-oxo-1211-oxo-1212-oxo-1213-oxo-1214-oxo-1215-oxo-1216-oxo-1217-oxo-1218-oxo-1219-oxo-1220-oxo-1221-oxo-1222-oxo-1223-oxo-1224-oxo-1225-oxo-1226-oxo-1227-oxo-1228-oxo-1229-oxo-1230-oxo-1231-oxo-1232-oxo-1233-oxo-1234-oxo-1235-oxo-1236-oxo-1237-oxo-1238-oxo-1239-oxo-1240-oxo-1241-oxo-1242-oxo-1243-oxo-1244-oxo-1245-oxo-1246-oxo-1247-oxo-1248-oxo-1249-oxo-1250-oxo-1251-oxo-1252-oxo-1253-oxo-1254-oxo-1255-oxo-1256-oxo-1257-oxo-1258-oxo-1259-oxo-1260-oxo-1261-oxo-1262-oxo-1263-oxo-1264-oxo-1265-oxo-1266-oxo-1267-oxo-1268-oxo-1269-oxo-1270-oxo-1271-oxo-1272-oxo-1273-oxo-1274-oxo-1275-oxo-1276-oxo-1277-oxo-1278-oxo-1279-oxo-1280-oxo-1281-oxo-1282-oxo-1283-oxo-1284-oxo-1285-oxo-1286-oxo-1287-oxo-1288-oxo-1289-oxo-1290-oxo-1291-oxo-1292-oxo-1293-oxo-1294-oxo-1295-oxo-1296-oxo-1297-oxo-1298-oxo-1299-oxo-1300-oxo-1301-oxo-1302-oxo-1303-oxo-1304-oxo-1305-oxo-1306-oxo-1307-oxo-1308-oxo-1309-oxo-1310-oxo-1311-oxo-1312-oxo-1313-oxo-1314-oxo-1315-oxo-1316-oxo-1317-oxo-1318-oxo-1319-oxo-1320-oxo-1321-oxo-1322-oxo-1323-oxo-1324-oxo-1325-oxo-1326-oxo-1327-oxo-1328-oxo-1329-oxo-1330-oxo-1331-oxo-1332-oxo-1333-oxo-1334-oxo-1335-oxo-1336-oxo-1337-oxo-1338-oxo-1339-oxo-1340-oxo-1341-oxo-1342-oxo-1343-oxo-1344-oxo-1345-oxo-1346-oxo-1347-oxo-1348-oxo-1349-oxo-1350-oxo-1351-oxo-1352-oxo-1353-oxo-1354-oxo-1355-oxo-1356-oxo-1357-oxo-1358-oxo-1359-oxo-1360-oxo-1361-oxo-1362-oxo-1363-oxo-1364-oxo-1365-oxo-1366-oxo-1367-oxo-1368-oxo-1369-oxo-1370-oxo-1371-oxo-1372-oxo-1373-oxo-1374-oxo-1375-oxo-1376-oxo-1377-oxo-1378-oxo-1379-oxo-1380-oxo-1381-oxo-1382-oxo-1383-oxo-1384-oxo-1385-oxo-1386-oxo-1387-oxo-1388-oxo-1389-oxo-1390-oxo-1391-oxo-1392-oxo-1393-oxo-1394-oxo-1395-oxo-1396-oxo-1397-oxo-1398-oxo-1399-oxo-1400-oxo-1401-oxo-1402-oxo-1403-oxo-1404-oxo-1405-oxo-1406-oxo-1407-oxo-1408-oxo-1409-oxo-1410-oxo-1411-oxo-1412-oxo-1413-oxo-1414-oxo-1415-oxo-1416-oxo-1417-oxo-1418-oxo-1419-oxo-1420-oxo-1421-oxo-1422-oxo-1423-oxo-1424-oxo-1425-oxo-1426-oxo-1427-oxo-1428-oxo-1429-oxo-1430-oxo-1431-oxo-1432-oxo-1433-oxo-1434-oxo-1435-oxo-1436-oxo-1437-oxo-1438-oxo-1439-oxo-1440-oxo-1441-oxo-1442-oxo-1443-oxo-1444-oxo-1445-oxo-1446-oxo-1447-oxo-1448-oxo-1449-oxo-1450-oxo-1451-oxo-1452-oxo-1453-oxo-1454-oxo-1455-oxo-1456-oxo-1457-oxo-1458-oxo-1459-oxo-1460-oxo-1461-oxo-1462-oxo-1463-oxo-1464-oxo-1465-oxo-1466-oxo-1467-oxo-1468-oxo-1469-oxo-1470-oxo-1471-oxo-1472-oxo-1473-oxo-1474-oxo-1475-oxo-1476-oxo-1477-oxo-1478-oxo-1479-oxo-1480-oxo-1481-oxo-1482-oxo-1483-oxo-1484-oxo-1 |                    |            |            |                      |                             |                                                          |

|     |        |            |                                                                                                  |                    |            |             |                                                     |                              |                                                                      |
|-----|--------|------------|--------------------------------------------------------------------------------------------------|--------------------|------------|-------------|-----------------------------------------------------|------------------------------|----------------------------------------------------------------------|
| 945 | 2. 511 | 375. 17459 | Cyproterone                                                                                      | [M+H] <sup>+</sup> | 375. 17215 | C22H27ClO3  | Gluco/mineralocorticoids<br>progestogens and        | DU\$HUSLJJDGTE-UHFFFAOYNA-N  | CC(C1(CCC2C3C=C(C4=CC(C5CC5C4(C)C3CCC21C)=O)C1)O)=O                  |
| 946 | 2. 52  | 305. 16125 | Propentofylline                                                                                  | [M-H] <sup>-</sup> | 305. 1619  | C15H22N4O3  | Xanthines                                           | RBQQRQRFDPXAGN-UHFFFAOYSA-N  | O=C1C2=C(N=CN2CC)N(C(=O)N1CCCC(=O)C)C                                |
| 947 | 2. 526 | 357. 21194 | galbulin                                                                                         | [M+H] <sup>+</sup> | 357. 20999 | C22H28O4    | Aryltetralin lignans                                | WYBOV1SLCPAJFV-QLEMLULZSA-N  | O(C1=CC=C(C=C1OC)C2C3=CC(OC)=C(OC)C=C3CC(C)C2)C                      |
| 948 | 2. 534 | 174. 02164 | ANILINE-2-SULFONIC ACID                                                                          | [M+H] <sup>+</sup> | 174. 02    | C6H7N       | Aniline and substituted<br>anilines                 | PAYRUJLWNCNPSJ-UHFFFAOYSA-N  | NC=1C=CC=CC1                                                         |
| 949 | 2. 537 | 125. 05965 | Isovaleric acid                                                                                  | [M+H] <sup>+</sup> | 125. 06    | C5H10O2     | Methyl-branched fatty<br>acids                      | GWYPCCOPABKNJV-UHFFFAOYSA-N  | O=C(O)CC(C)C                                                         |
| 950 | 2. 538 | 291. 15387 | 1-(8-methyl-3a,4,5,6-tetrahydro-1H-pyrazino[3,2,1-jk]carbazol-3(2H)-yl)ethanone                  | [M+H] <sup>+</sup> | 291. 14999 | C17H20N2O   | Carbazoles                                          | TVYGDGMZPKRPM-UHFFFAOYSA-N   | O=C(N1CCN2C3=C(C=C(C3C4=C2C1CCC4)C)C                                 |
| 951 | 2. 538 | 340. 14975 | Tetrahydroberberine                                                                              | [M+H] <sup>+</sup> | 340. 14999 | C20H21NO4   | Protoberberine alkaloids<br>and derivatives         | VZTU1EROBZXUFA-MRXNPFDSA-N   | O(C1=CC=C2C(=C1OC)CN3CCC4=CC=5OC5C=C4C3C2)C                          |
| 952 | 2. 544 | 285. 17981 | Oseltamivir carboxylate                                                                          | [M+H] <sup>+</sup> | 285. 18088 | C14H24N2O4  | Gamma amino acids and<br>derivatives                | NENPYTRHICXVCS-YNEHK1RBSA-N  | CCC(CC)O[C=H]1C=C(C[C=H](N)[C=H]1N=C(C)O)C(O)=O                      |
| 953 | 2. 545 | 385. 15891 | (2R,3S,4S,5R,6S)-2-(hydroxymethyl)-6-(3,4,5-trimethoxyphenoxy)oxane-3,4,5-triol                  | [M+H] <sup>+</sup> | 385. 159   | C15H22O9    | Phenolic glycosides                                 | NBLLRWANAFOKON-ZHZZCYKASA-N  | OC1OC(OC=2C=C(OC)C(OC)=C(OC)C2)C(O)C(O)C1O                           |
| 954 | 2. 545 | 317. 16904 | (S)-[6]gingerol                                                                                  | [M+H] <sup>+</sup> | 317. 17001 | C17H26O4    | Gingerols                                           | NLDDIKRKFEXWBK-CQSZAC1VSA-N  | O=C(OC(C1=CC=C(O)C(OC)=C1)CC(O)CCCC                                  |
| 955 | 2. 554 | 122. 09717 | 2,6-Xylidine                                                                                     | [M+H] <sup>+</sup> | 122. 09643 | C8H11N      | m-Xylenes                                           | UFEBMTHBGFGIHF-UHFFFAOYSA-N  | CC=C1C=CC=C(C)C1N                                                    |
| 956 | 2. 557 | 298. 09607 | 5'-S-Methylthioadenosine                                                                         | [M+H] <sup>+</sup> | 298. 09683 | C11H15N5O3S | 5'-deoxy-5'-<br>thionucleosides                     | WUUGFSXJNOTRMR-IOSLPCCSA-N   | CSC[C=H]10[C=H]([C=H]1)[C=H]10)N1C=NC2(C)N=N=CN=C12                  |
| 957 | 2. 557 | 331. 19568 | 8-[3-oxo-2-[(E)-pent-2-enyl]cyclopenten-1-yl]octanoic acid                                       | [M+H] <sup>+</sup> | 331. 19421 | C18H28O3    | Medium-chain fatty acids                            | RHWQVSLVMXMBR-VXNBXDJSA-N    | O=C(O)CCCCCCC1=C(C(=O)CC1)CC=CCC                                     |
| 958 | 2. 561 | 447. 112   | Cynaroside                                                                                       | [M-H] <sup>-</sup> | 447. 112   | C21H20O11   | Flavonoid-7-O-glycosides                            | PEFNSGRTCBGNAN-QNDFKXLGSA-N  | O=C1C=C(OC2=CC(OC3OC(C)C(O)C3O)=CC(O)=C12)C4=C(CO)=C(O)C4            |
| 959 | 2. 566 | 224. 12794 | Bufexamac                                                                                        | [M+H] <sup>+</sup> | 224. 12801 | C12H17N3O3  | Phenylacetamides                                    | MXJWRABVEGLYDG-UHFFFAOYSA-N  | O=C(NC)CC1=CC=C(OC(C)C)C=C1                                          |
| 960 | 2. 567 | 259. 00827 | Bromacil                                                                                         | [M-H] <sup>-</sup> | 259. 00876 | C9H13BrN2O2 | Halopyrimidines                                     | CTSLUCNDVMDHG-UHFFFAOYNA-N   | CCC(C)N1C(O)=NC(=C(Br)C1)=O                                          |
| 961 | 2. 568 | 146. 1171  | (S)-3-Amino-5-methylhexanoic acid                                                                | [M+H] <sup>+</sup> | 146. 11755 | C7H15NO2    | Beta amino acids and<br>derivatives                 | MLYMS1KVLAPCAK-LURJTMIESA-N  | CC(C)C[C=H](N)CC(O)=O                                                |
| 962 | 2. 58  | 247. 1279  | desmotroposantonin                                                                               | [M+H] <sup>+</sup> | 247. 13    | C15H18O3    | Naphthofurans                                       | ZLKGXNSQJJSAU-PSEJXGSSA-N    | O=C1OC2C=3C(C(O)C=C(C3CCC21C)C)C                                     |
| 963 | 2. 582 | 208. 0598  | 7,8-dimethoxy-benzo[d][1,2]oxazin-1-one                                                          | [M+H] <sup>+</sup> | 208. 06    | C10H9NO4    | Benzoxazines                                        | KPEBLJUVHUTNCC-UHFFFAOYSA-N  | O=C1ON=CC=2C=CC(OC)=C(OC)C12                                         |
| 964 | 2. 592 | 292. 04517 | 1,8-dinitropyrene                                                                                | [M-H] <sup>-</sup> | 292. 04895 | C16H8N2O4   | Pyrenes                                             | BLYYNH1KOMELAP-UHFFFAOYSA-N  | C1=CC=2C=CC(=C3C=CC4=C(C=CC1=C4C23)N(=O)=O)N(=O)=O                   |
| 965 | 2. 598 | 319. 15021 | [(2R)-1-[(2S)-6-oxo-2,3-dihydropyran-2-yl]propan-2-yl]-3-(3,4-dihydroxyphenyl)propanoate         | [M-H] <sup>-</sup> | 319. 14777 | C17H20O6    | Catechols                                           | DEJPAJWPUCTUPL-YPMHXNCESA-N  | O=C1OC(CC=C1)CC(OC(=O)CCC2=CC=C(O)C(=O)=C2)C                         |
| 966 | 2. 598 | 239. 10242 | Felbamate                                                                                        | [M+H] <sup>+</sup> | 239. 10263 | C11H14N2O4  | Benzene and substituted<br>derivatives              | WKGXYQOCVYPAC-UHFFFAOYSA-N   | N=C(O)OCC(C1=CC=CC=C1)OCC(=N)O                                       |
| 967 | 2. 598 | 305. 14777 | Miltirone                                                                                        | [M+H] <sup>+</sup> | 305. 14999 | C19H22O2    | Tanshinones,<br>isotanshinones, and                 | FEFA1BOZOKSLJR-UHFFFAOYSA-N  | O=C1C(=O)C(=CC=2C=CC3=C(C21)CCCC3(C)C)C(C)C                          |
| 968 | 2. 598 | 272. 14792 | Pesticide5_Methoprotryne_C11H21N5O5_                                                             | [M+H] <sup>+</sup> | 272. 15399 | C11H21N5O5  | Methylthio-s-triazines                              | DDU1UBJPQOKOMV-UHFFFAOYSA-N  | N=1C(=NC(=NC1CCOC)NC(C)SC                                            |
| 969 | 2. 602 | 135. 06491 | 2-Deoxyribose                                                                                    | [M+H] <sup>+</sup> | 135. 06519 | C5H10O4     | Beta-hydroxy aldehydes                              | ASJSAQIRZKANQN-UHFFFAOYNA-N  | O=CCC(O)C(O)CO                                                       |
| 970 | 2. 602 | 283. 16464 | ANISOMYCIN                                                                                       | [M+H] <sup>+</sup> | 283. 16522 | C14H19NO4   | Anisoles                                            | YKJYKKNCCRKFSL-BFHYXJOUA-N   | O=C(OC1C(O)CNC1CC2=CC=C(OC)C=C2)C                                    |
| 971 | 2. 604 | 488. 25916 | deltamine                                                                                        | [M+H] <sup>+</sup> | 488. 26001 | C25H39NO7   | Aconitane-type<br>diterpenoid alkaloids             | GLMPFCVWRKKB-JB-YUAUPFRZA-N  | OC1C2C3(C)CN(CO)C4C51OCOC65CC(OC)C7CC(O)(C6C7OC)C42C(O)C1C3          |
| 972 | 2. 617 | 229. 15366 | Leucylproline                                                                                    | [M+H] <sup>+</sup> | 229. 15511 | C11H20N2O3  | Dipeptides                                          | VTJUN1YRYIAIHF-UHFFFAOYNA-N  | O=C(O)C1N(C(=O)C)NC(O)C)CCC1                                         |
| 973 | 2. 623 | 373. 17047 | 2-[2-[(Z)-pent-2-enyl]-3-[3,4,5-trihydroxy-6-(hydroxymethyl)oxan-2-yl]oxycyclopentyl]lactic acid | [M-H] <sup>-</sup> | 373. 17352 | C18H30O8    | Fatty acyl glycosides of<br>mono- and disaccharides | GJZJZRWFRZFTEE-ARJAWSKDSA-N  | O=C(O)C1CCC(OC2OC(C)C(O)C(=O)C2O)C1CC=CCC                            |
| 974 | 2. 624 | 192. 97765 | PYROCATECHUIC ACID                                                                               | [M+H] <sup>+</sup> | 192. 98041 | C7H6O4      | Salicylic acids                                     | GLDQAMYCGOIJDV-UHFFFAOYSA-N  | O=C(O)C=1C=CC=C(O)C1O                                                |
| 975 | 2. 625 | 234. 16899 | (2R)-2-[(2R,5S)-5-[(2S)-2-hydroxybutyl]oxolan-2-yl]propanoic acid                                | [M+H] <sup>+</sup> | 234. 16997 | C11H20O4    | Oxolanes                                            | HTCUURQJNZBKIA-XFWSIPNHSA-N  | O=C(O)C(C)C1OC(C1)CC(O)CC                                            |
| 976 | 2. 625 | 221. 09212 | Ethyl 9-D-glucuronide                                                                            | [M-H] <sup>-</sup> | 221. 09399 | C8H14O7     | O-glucuronides                                      | 1WJBJVMJWSPZQJH-UQGZVRACSA-N | O=C(O)C1OC(OC)C(O)C(O)C1O                                            |
| 977 | 2. 629 | 551. 24854 | Pseudolaric Acid A-O-beta-D-glucopyranoside                                                      | [M+H] <sup>+</sup> | 551. 25    | C28H38O11   | Diterpene lactones                                  | IYVWRYGMQNDQB-VHJBJYHKS-A-N  | O=C(OC1OC(CO)C(O)C1O)C(=CC=CC2(OC(=O)C34CC=C(C)CCC4(OC(=O)C)C2C3)C)C |
| 978 | 2. 631 | 277. 11722 | 1-Pentanone, 3-hydroxy-1,5-diphenyl-                                                             | [M+H] <sup>+</sup> | 277. 1199  | C17H18O2    | Alkyl-phenylketones                                 | QJUWGGININGVSC-UHFFFAOYSA-N  | O=C(C(=1C=CC=CC1)CC(O)CCC=2C=CC=CC2                                  |
| 979 | 2. 64  | 307. 08417 | Clobenpropit                                                                                     | [M-H] <sup>-</sup> | 307. 07898 | C14H17ClN4S | Chlorobenzenes                                      | UCA1EVHKDLM1FL-UHFFFAOYSA-N  | C1C1=CC=C(C=C1)CNC(=N)SCCCC2=CN=CN2                                  |
| 980 | 2. 641 | 145. 04965 | Adipic acid                                                                                      | [M-H] <sup>-</sup> | 145. 05063 | C6H10O4     | Medium-chain fatty acids                            | WNLRTBRMVRJNCN-UHFFFAOYSA-N  | O=C(O)CCCC(=O)O                                                      |
| 981 | 2. 647 | 352. 18637 | Eseroline Fumarate                                                                               | [M+H] <sup>+</sup> | 352. 18668 | C17H22N2O5  | Pyrrrolindoles                                      | PBZRBRADJWNBPNY-WLHGVMLRSA-N | O=C(O)C=CC(=O)O.OC1=CC=C2C(=C1)C3(C)CN(C)C3N2C                       |
| 982 | 2. 647 | 263. 15131 | phenylacetylglutamine                                                                            | [M-H] <sup>-</sup> | 263. 15192 | C13H16N2O4  | N-acyl-alpha amino acids                            | FLFLIEFSWGNOPJJ-JTQLQ1EISA-N | O=C(O)C(N=C(O)CC=1C=CC=CC1)CCC(=N)O                                  |
| 983 | 2. 653 | 159. 09116 | 1-Benzylimidazole                                                                                | [M+H] <sup>+</sup> | 159. 09167 | C10H10N2    | N-substituted imidazoles                            | KKKDDZZJCRFGSD-UHFFFAOYSA-N  | N=1C=CN(C1)CC=2C=CC=CC2                                              |
| 984 | 2. 673 | 333. 16385 | (5R)-5-hydroxy-1-(4-hydroxy-3-methoxyphenyl)decan-3-one                                          | [M+H] <sup>+</sup> | 333. 16513 | C17H26O4    | Gingerols                                           | NLDDIKRKFEXWBK-CQSZAC1VSA-N  | O=C(OC(C1=CC=C(O)C(OC)=C1)CC(O)CCCC                                  |
| 985 | 2. 673 | 263. 14029 | Prolylphenylalanine                                                                              | [M+H] <sup>+</sup> | 263. 14069 | C14H18N2O3  | Dipeptides                                          | 1W1ANZLCJYVEFX-UHFFFAOYNA-N  | O=C(O)C(NC(=O)C1NCCC1)CC2=CC=CC=C2                                   |
| 986 | 2. 673 | 102. 09207 | valeramide                                                                                       | [M+H] <sup>+</sup> | 102. 09134 | C5H11NO     | Fatty amides                                        | 1PWFJLQDVFKJDU-UHFFFAOYSA-N  | N=C(O)CCCC                                                           |
| 987 | 2. 675 | 299. 07574 | Benzoic acid + 10, 0-Hex                                                                         | [M-H] <sup>-</sup> | 299. 07611 | C13H16O8    | Phenolic glycosides                                 | XSSDY1MYZONMEL-UHFFFAOYNA-N  | O=C(O)C2=CC=C(OC1OC(CO)C(O)C1)C(=O)C=C2                              |

|      |       |           |                                                                                                                                                                                                                                    |                    |           |               |                                    |                              |                                                                                              |
|------|-------|-----------|------------------------------------------------------------------------------------------------------------------------------------------------------------------------------------------------------------------------------------|--------------------|-----------|---------------|------------------------------------|------------------------------|----------------------------------------------------------------------------------------------|
| 988  | 2.677 | 293.11203 | Climbazole                                                                                                                                                                                                                         | [M+H] <sup>+</sup> | 293.10513 | C15H17C1N2O2  | Phenol ethers                      | OEWGHB0CFMBLFP-UHFFFAOYNA-N  | CC(C) C(C) C(N(C=CN(C1) OC2=CC=C(C=C2) C1)=O                                                 |
| 989  | 2.68  | 196.06087 | "3,4-DIHYDROXY-L-PHENYLALANINE"                                                                                                                                                                                                    | [M-H] <sup>-</sup> | 196.061   | C9H11N04      | Tyrosine and derivatives           | WTRDRQBEARUVNC-UHFFFAOYSA-N  | O=C(O) C(N) CC1=CC=C(O) C(O)=C1                                                              |
| 990  | 2.684 | 237.12273 | Alanylphenylalanine                                                                                                                                                                                                                | [M+H] <sup>+</sup> | 237.1254  | C12H16N2O3    | Dipeptides                         | OMNVYXHOSHNRUL-UHFFFAOYNA-N  | O=C(O) C( NC (=O) C(N) C) CC1=CC=CC=C1                                                       |
| 991  | 2.684 | 367.15933 | Dehydroisoandrosterone sulfate                                                                                                                                                                                                     | [M-H] <sup>-</sup> | 367.15848 | C19H28O5S     | Sulfated steroids                  | CZWCKZRVVOZZJNW-UHFFFAOYNA-N | O=C1CCC2C3CC=C4CC(OS(=O)(=O) CCC4) C3CCC12C                                                  |
| 992  | 2.69  | 345.12744 | santin                                                                                                                                                                                                                             | [M+H] <sup>+</sup> | 345.12683 | C18H16O7      | 6-O-methylated flavonoids          | DWZAJFEYZIHFO-UHFFFAOYSA-N   | O=C1(C) C(=C(OC2=CC(O)=C(C) C(O)=C12) C=3C=CC(OC)=CC3                                        |
| 993  | 2.692 | 348.13931 | (R)-1-((4,8-dimethoxyfuro[2,3-b]quinolin-7-yl)oxy)-3-methylbutane-2,3-diol                                                                                                                                                         | [M+H] <sup>+</sup> | 348.14001 | C18H21NO6     | Furanoquinolines                   | PXGMNDHTVJAHL-CYBMJJFWSA-N   | OC(COC(=C=CC2=C(N=C3OC=CC3=C2OC) C1OC) C(O) C(C) C                                           |
| 994  | 2.692 | 161.10818 | Tryptamine (not validated)                                                                                                                                                                                                         | [M+H] <sup>+</sup> | 161.108   | C10H12N2      | Indole and derivatives             | APJYDQYYACXCRM-UHFFFAOYSA-N  | NCCC=CNC1=CC=CC=C12                                                                          |
| 995  | 2.693 | 387.13974 | DL-Praeurtorin A                                                                                                                                                                                                                   | [M+H] <sup>+</sup> | 387.14001 | C21H22O7      | Angular pyranocoumarins            | XGPBRZDOJDLKOT-IZZDOVSWSA-N  | O=C1OC2=C(C=C1) C=CC=3OC(C) C(C) C(OC(=O) C(=CC) C) C(OC(=O) C1) C32                         |
| 996  | 2.697 | 176.07047 | 3-Indoleacetic acid                                                                                                                                                                                                                | [M+H] <sup>+</sup> | 176.0706  | C10H9NO2      | Indole-3-acetic acid derivatives   | SEOVTRFC1GRIMH-UHFFFAOYSA-N  | c1ccc2c(c1)c(cc(=O) O) c[nH]2                                                                |
| 997  | 2.697 | 227.07596 | cis-resveratrol                                                                                                                                                                                                                    | [M-H] <sup>-</sup> | 227.07137 | C14H12O3      | Stilbenes                          | LUKBXSAWLPMSZ-UHFFFAOYSA-N   | OC1=CC=C(C=CC2=CC(O)=CC(O)=C2) C=C1                                                          |
| 998  | 2.698 | 204.14201 | Crotamiton                                                                                                                                                                                                                         | [M+H] <sup>+</sup> | 204.13829 | C13H17NO      | Anilides                           | DNTGZGPQQTQKF-UHFFFAOYSA-N   | CC=CC(N) CC(C1=CC=CC=C1) C=O                                                                 |
| 999  | 2.702 | 369.12857 | gibberellic acid                                                                                                                                                                                                                   | [M+H] <sup>+</sup> | 369.13    | C19H22O6      | C19-gibberellin 6-carboxylic acids | I XORZMNAPKEEDV-OBDJNFBSA-N  | O=C(O) C1C2C3(C(=O) C2) C(C) C(C3) C4CCCC(O) C(=C) C(C1) C45                                 |
| 1000 | 2.705 | 571.29352 | Khayanathone                                                                                                                                                                                                                       | [M+H] <sup>+</sup> | 571.29016 | C32H42O9      | Limonoids                          | AKPJXLBDLSOFY-YCUUMJCDSA-N   | O=C(OC1CC(OC(=O) C2) C(C) C(OC(=O) C) C3(C) C2CCCC4(C) C(C(=O) C5OC543) C6=COC=C6) C1(C) C1C |
| 1001 | 2.706 | 288.14313 | 11,22-dimethyl 6E,17E)-3,14-dioxo-8,19-bis(((2S,3R,4S,5S,6R)-3,4,5-trihydroxy-6-(hydroxymethyl)oxan-2-ylloxy))-4,9,15,20-                                                                                                          | [M+H] <sup>+</sup> | 288.14417 | C13H18O6      | O-glycosyl compounds               | GKHCBYBLTXYEY-UJPAAIJSA-N    | OC1OC(OC2=CC=CC2) C(O) C(O) C1O                                                              |
| 1002 | 2.706 | 186.1485  | Chrysanthemic Acid                                                                                                                                                                                                                 | [M+H] <sup>+</sup> | 186.14885 | C10H16O2      | Monocyclic monoterpenoids          | XLOPRKKSJMMEW-UHFFFAOYSA-N   | O=C(O) C1C(C=C(C) C) C1(C) C                                                                 |
| 1003 | 2.71  | 235.10803 | Carbetamide                                                                                                                                                                                                                        | [M-H] <sup>-</sup> | 235.10881 | C12H16N2O3    | Phenylcarbamic acid esters         | AMRXHFHNZFDCU-UHFFFAOYNA-N   | CCN=C(O) C(C) C(O) C(=O) N=C1=CC=CC=C1                                                       |
| 1004 | 2.736 | 561.31152 | sodium (E)-2-((4S)-16-acetoxy-3,11-dihydroxy-4,8,10,14-tetramethyldodecahydro-1H-cyclopenta[a]phenanthren-17(2H,10H,14H)-                                                                                                          | [M+H] <sup>+</sup> | 561.31    | C31H47NaO6    | Steroid esters                     | HJHVQCXHMVGNCZ-LHTWEHRSA-M   | [Na <sup>+</sup> ], O=C(1O=1) C(=C1C(OC(=O) C) C2) C(C) C2(C) C1(C) C(C) C(C) C4OCC32        |
| 1005 | 2.741 | 180.10284 | (R)-3-Amino-4-phenylbutyric acid                                                                                                                                                                                                   | [M+H] <sup>+</sup> | 180.1019  | C10H13NO2     | Beta amino acids and derivatives   | OFVBKLINTLPEGH-SECBINFHISA-N | N[C-H] (CC(O)=O) CC1=CC=CC=C1                                                                |
| 1006 | 2.745 | 295.12836 | Aspartame                                                                                                                                                                                                                          | [M+H] <sup>+</sup> | 295.12885 | C14H18N2O5    | Peptides                           | IAOZJIPTCAWRG-QWRGIYKSSA-N   | COC(=O) [C-H] (Cc1ccccc1) N=C([C-H] (CC(=O) O) N) O                                          |
| 1007 | 2.746 | 255.10432 | Ketoprofen                                                                                                                                                                                                                         | [M+H] <sup>+</sup> | 255.10158 | C16H14O3      | Benzophenones                      | DKYVVDODHFEZIM-UHFFFAOYNA-N  | CC(C(O)=O) C1=CC(=CC(C1) C(=O) C1=CC=CC=C1                                                   |
| 1008 | 2.749 | 479.16275 | Flavin Mononucleotide                                                                                                                                                                                                              | [M+H] <sup>+</sup> | 479.16177 | C17H21N4O9P   | Flavin nucleotides                 | FVTCRASFAZXNN-SCRCRAPSA-N    | O=C1N=C(O) C2=C3N=CC(=C(C=C3N(C2=N1) CC(O) C(C) C(O) COP(=O)(O) O) C                         |
| 1009 | 2.759 | 322.13937 | Pesticide1 Pyriproxyfen_C20H19NO3 Pyridine, 2-[1-methyl-2-(4-nhenoxynhenoxylethoxy)-                                                                                                                                               | [M+H] <sup>+</sup> | 322.14301 | C20H19NO3     | Diphenylethers                     | NHDHVHZCFYSRB-UHFFFAOYSA-N   | N=C1=CC=CC1OC(C) COC2=CC=C(OC(=3C=CC=CC3) C=C2                                               |
| 1010 | 2.762 | 425.1907  | Kushanol F                                                                                                                                                                                                                         | [M+H] <sup>+</sup> | 425.19    | C25H28O6      | 8-prenylated flavanones            | XRYVAQLDYTHCL-CIQJOMJSA-N    | O=C1C2=C(O) C=C(O) C(=C2OC(=3=CC=C(O) C=C3O) C1) CC(C(=C) C) C(=CC(C) C                      |
| 1011 | 2.774 | 316.07977 | [2-[(E)-3,4-dihydropent-1-enyl]-6-oxooxan-3-yl] (E)-2-methylbut-2-enoate                                                                                                                                                           | [M+H] <sup>+</sup> | 316.07916 | C15H22O6      | Delta valerolactones               | WEDIEMZPFJDNCG-BZNITMXSSA-N  | O=C(OC1CCC(=O) OC1C=CC(O) C(O) C) C(=CC) C                                                   |
| 1012 | 2.778 | 229.11754 | Proline-hydroxyproline                                                                                                                                                                                                             | [M+H] <sup>+</sup> | 229.11829 | C10H16N2O4    | Dipeptides                         | ONPXCLZMDSJLSP-UHFFFAOYNA-N  | O=C(O) CIN(C(=O) C2NCCC2) CC(O) C1                                                           |
| 1013 | 2.782 | 370.1123  | kinetin riboside                                                                                                                                                                                                                   | [M+H] <sup>+</sup> | 370.10999 | C15H17N5O5    | Purine nucleosides                 | CAGLGYNQSTUGX-SDBHTRESA-N    | OC1OC(N2C=NC(=C(-NC=NC3) NC=4OC=CC4) C1) C(C1O                                               |
| 1014 | 2.784 | 480.1701  | [(2R,3S,4S,5R,6R)-6-[(2S,3S,4S,5R)-3,4-dihydroxy-2,5-bis(hydroxymethyl)oxolan-2-yl]oxy-3,4,5-trihydroxyoxan-2-yl]methyl 4-[4,5-dihydroxy-3,4-bis(hydroxymethyl)-4a,8,8-trimethyl-5,6,7,8a-tetrahydro-1H-naphthalen-1-yl] hexanoate | [M+H] <sup>+</sup> | 480.17114 | C19H26O13     | O-glycosyl compounds               | CDTMEVVBGLIF-OVUASUJSA-N     | O=C(OC1CC(OC2(OC(CO)C(O)C2O)C(C)C(O)C1O)C3=CC=C(CO)C=C3)                                     |
| 1015 | 2.785 | 407.24121 | 2',2'-Difluoro-2'-deoxyuridine                                                                                                                                                                                                     | [M+H] <sup>+</sup> | 407.24039 | C21H36O6      | Fatty acid esters                  | PBKUHTZGOWKEU-UHFFFAOYSA-N   | O=C(OC1C=C(CO)C(O) C(O) C2(C)C(C)C(C)C(C12)OCCCC                                             |
| 1016 | 2.785 | 265.06323 | 2'-2'-Difluoro-2'-deoxyuridine                                                                                                                                                                                                     | [M+H] <sup>+</sup> | 265.06305 | C9H10F2N2O5   | Pyrimidine 2'-deoxyribonucleosides | FIRDBEQ1QERSE-QPPQHFZASA-N   | OC[C-H]1O[C-H](N2C=CC(O)=NC2=O)C(F)[C-H]1O                                                   |
| 1017 | 2.787 | 337.13873 | aurapten                                                                                                                                                                                                                           | [M+H] <sup>+</sup> | 337.13971 | C19H22O3      | Terpene lactones                   | RSDHGSKLQSQFK-RYDMVPIBSA-N   | O=C1OC=2C=C(OC(C=C)CCC=C(C)C)C=C2C=C1                                                        |
| 1018 | 2.797 | 265.15353 | Feruloyl putrescine (isomer of 1173)                                                                                                                                                                                               | [M+H] <sup>+</sup> | 265.15469 | C14H20N2O3    | Ferulic acid and derivatives       | SFUVCMKSYKHYLD-UHFFFAOYSA-N  | O=C(C=CC(=C=CC(O)=C(CO)C)N)NCCCC                                                             |
| 1019 | 2.8   | 356.13199 | (1R,3R,4S,5R)-1,3,4-trihydroxy-5-[(E)-3-(4-hydroxyphenyl)prop-2-enoyl]oxycyclohexane-1-carboxylic acid                                                                                                                             | [M+H] <sup>+</sup> | 356.13397 | C16H18O8      | Quinic acids and derivatives       | BMSEYFENKXDIS-QHAYPTCMSA-N   | O=C(OC1CC(O) C(=O) C(C) C1O) C1OC=CC2=CC(C) C=C2                                             |
| 1020 | 2.8   | 361.19592 | Prednisolone                                                                                                                                                                                                                       | [M+H] <sup>+</sup> | 361.20096 | C21H28O5      | 21-hydroxysteroids                 | OIGXJSKKLXVSL5-VWUMJDOOSA-N  | C(=C12C[C-H]1O[C-H]3[C-H](CCC4=CC(=O)C=C(C134C)[C-H]11OC(=C2)C(C)=O)C                        |
| 1021 | 2.808 | 319.12817 | Irigenol                                                                                                                                                                                                                           | [M+H] <sup>+</sup> | 319.1286  | C15H10O8      | Isoflavones                        | DFURNQJNFMYTHM-UHFFFAOYSA-N  | O=C1C(=COC2=C(O) C(=O) C(O) C=C12) C=3C=C(C) C(O) C(=O) C3                                   |
| 1022 | 2.808 | 128.07082 | L-PIPECOLIC ACID                                                                                                                                                                                                                   | [M-H] <sup>-</sup> | 128.071   | C6H11NO2      | Alpha amino acids                  | HXEACLLIILLPRG-UHFFFAOYSA-N  | O=C(O)C1NCCC1                                                                                |
| 1023 | 2.811 | 413.13992 | Loganin                                                                                                                                                                                                                            | [M+H] <sup>+</sup> | 413.14001 | C17H26O10     | Iridoid O-glycosides               | AMBQHHVBBHTQBF-UOUCRYGSSA-N  | O=C(OC)C1=CC(OC2OC(CO)C(O)C(O)C2O)C3C1CC(O)C3C                                               |
| 1024 | 2.812 | 347.13058 | Aucubin                                                                                                                                                                                                                            | [M+H] <sup>+</sup> | 347.13    | C15H22O9      | Iridoid O-glycosides               | RJWJHRPNHPIHRYN-FKVJWERZSA-N | OC1=CC(O)C2C=CC(OC3OC(CO)C(O)C(C)C3O)C12                                                     |
| 1025 | 2.819 | 401.23792 | Bisucaberin                                                                                                                                                                                                                        | [M+H] <sup>+</sup> | 401.23999 | C18R32N4O6    | Macrolactams                       | G7ADQMQRQBOJIO-UHFFFAOYSA-N  | O=C1N(O)CCCCN=C(O)CCC(=O)N(O)CCCCN=C(O)CC1                                                   |
| 1026 | 2.832 | 285.12521 | Articaïne HCl                                                                                                                                                                                                                      | [M+H] <sup>+</sup> | 285.12701 | C13H21C1N2O3S | Alpha amino acid amides            | GWDWBGSGNEMGJ-UHFFFAOYSA-N   | C1. O=C(OC) C=1SC=C(C1NC(=O) C(NCCC) C                                                       |
| 1027 | 2.832 | 110.02074 | Hypotaurine                                                                                                                                                                                                                        | [M+H] <sup>+</sup> | 110.02702 | C2H7NO2S      | Sulfinic acids                     | VYIUBCNYACGLLY-UHFFFAOYNA-N  | NCS(O)=O                                                                                     |
| 1028 | 2.837 | 294.06021 | N4-Acetyl sulfamethoxazole                                                                                                                                                                                                         | [M-H] <sup>-</sup> | 294.05539 | C12H13N3O4S   | Benzene sulfonamides               | GXP1UNCZALHJVA-UHFFFAOYSA-N  | CC(O)=NC1=CC=C(C=C1)S(=O)(=O)NC1=O                                                           |
| 1029 | 2.847 | 137.05943 | 2-Hydroxyacetophenone                                                                                                                                                                                                              | [M+H] <sup>+</sup> | 137.05971 | C8H8O2        | Alkyl-phenylketones                | ZWVHTXAYIKBMEU-UHFFFAOYSA-N  | O=C(C=C1C=CC=CC1)CO                                                                          |
| 1030 | 2.854 | 287.16    | 2-(1-hydroxy-1-methoxy-3-methylbutyl)-6-methyl-5H-[1,3]dioxolo[4,5-f]chloridin-4-one                                                                                                                                               | [M+H] <sup>+</sup> | 287.16013 | C13H19NO5     | Pyridinones                        | VVLWYPUJJAWYBV-UHFFFAOYSA-N  | OC=1N=C(C=C2OC(OC12)C(O)C(CO)C(C)C                                                           |

|      |        |            |                                                                                                                         |                        |            |             |                                            |                              |                                                                                                 |
|------|--------|------------|-------------------------------------------------------------------------------------------------------------------------|------------------------|------------|-------------|--------------------------------------------|------------------------------|-------------------------------------------------------------------------------------------------|
| 1031 | 2. 854 | 316. 18579 | Nordihydrocapsaicin                                                                                                     | [M+H] <sup>+</sup>     | 316. 17999 | C17H27N03   | Methoxyphenols                             | VQEONGKQWIFHMN-UHFFFAOYSA-N  | O=C (NCC1=CC=C (O) C (OC)=C1) CCCCC (C) C                                                       |
| 1032 | 2. 855 | 217. 07097 | 1-hydroxypyrene                                                                                                         | [M-H] <sup>-</sup>     | 217. 06589 | C16H100     | Pyrenes                                    | BJJNHUAPTJVYVQ-UHFFFAOYSA-N  | C1=CC=2C=CC=3C=CC (=C4C=CC (=C1) C2C3) 4 0                                                      |
| 1033 | 2. 855 | 253. 12022 | lindenolol                                                                                                              | [M+H] <sup>+</sup>     | 253. 12    | C15H1802    | Naphthofurans                              | XRDJYSGPJZSG-HGUIZDCDSA-N    | OC1C2=C (OC=C2C) CC3 (C) C1C (=C) C4CC43                                                        |
| 1034 | 2. 875 | 421. 2438  | 3-(3, 4-dihydroxyphenyl)-5, 7-dihydroxy-6, 8-bis (3-methylbut-2-enyl) chromen-4-one                                     | [M-H] <sup>-</sup>     | 421. 24014 | C25H2606    | 6-prenylated isoflavonones                 | OAUIRSVJXOFAOO-UHFFFAOYSA-N  | 0=C1C (=COC2=C1C (O)=C (C (O) =C2C=C (C) C) CC=C (C) C) C=3C=CC (O)=C (O) C3                    |
| 1035 | 2. 882 | 251. 13829 | Caffeoyl putrescin (isomer of 1059)                                                                                     | [M+H] <sup>+</sup>     | 251. 1396  | C13H18N203  | Caffeic acid and derivatives               | KTZNZCYTXQEHT-UHFFFAOYSA-N   | O=C (C=C=C1C=CC (O) =C (O) C=1) NCCCCN                                                          |
| 1036 | 2. 89  | 102. 12746 | 1-Hexylamine                                                                                                            | [M+H] <sup>+</sup>     | 102. 12772 | C6H15N      | Monoalkylamines                            | BMVXCPBGZKUPN-UHFFFAOYSA-N   | CCCCCN                                                                                          |
| 1037 | 2. 898 | 254. 04308 | Kinetin                                                                                                                 | [M+H] <sup>+</sup>     | 254. 04387 | C10H9N50    | 6-alkylaminopurines                        | QANMHLXAZMSUEX-UHFFFAOYSA-N  | N=1C=NC=2C1NC=NC2NCC=3OC=CC3                                                                    |
| 1038 | 2. 899 | 359. 19031 | Prednisone                                                                                                              | [M+H] <sup>+</sup>     | 359. 1853  | C21H2605    | 21-hydroxysteroids                         | XOFYZVNMUHLCC-UHFFFAOYNA-N   | CC12CC (=O) C3C (CCC4=CC (=O) C=CC34C) C1CCC2 (O) C (=O) CO                                     |
| 1039 | 2. 912 | 285. 13354 | methyl 2-ethyl-4-[[ (3R, 4R, 5S)-5-hydroxy-4, 5-dimethyl-2-oxooxolan-3-yl]-2-methyl-3-oxobutanoate                      | [M-H] <sup>-</sup>     | 285. 13437 | C14H2206    | Annonaceous acetogenins                    | VOYCJQSSBDMXNQ-YZGKFDMSA-N   | O=C1OC (O) (C) C (C) C1CC (=O) C (C (=O) OC) (C) CC                                             |
| 1040 | 2. 913 | 428. 24899 | Ranolazine (Ranexa)                                                                                                     | [M+H] <sup>+</sup>     | 428. 254   | C24H33N304  | Anisoles                                   | XXLMZUWNAPSZ-UHFFFAOYSA-N    | O=C (NC=1C (=CC=C1C) C) CN2CC (CC2) CC (O) COC=3C=CC=CC3OC                                      |
| 1041 | 2. 919 | 332. 09717 | ADRENALINE BITARTRATE                                                                                                   | [M-H] <sup>-</sup>     | 332. 09869 | C13H19N09   | Catechols                                  | YLX1PWW10ISBDD-NDAAPVSOSA-N  | O=C (O) (C) C (O) C (=O) C. OC1=CC=C (C=1O) C (O) CNC                                           |
| 1042 | 2. 919 | 317. 11469 | eupomatoid 5                                                                                                            | [M+H] <sup>+</sup>     | 317. 11481 | C19H1803    | 2-arylbenzofuran flavonoids                | HMGCTPMQYVGXSC-SNAWJCMRSA-N  | OC=1C=CC (=CC1OC) C=2OC3=CC=C (C=CC) C=C3C2C                                                    |
| 1043 | 2. 919 | 237. 14984 | Gliocladiic acid 130132                                                                                                 | [M+H] <sup>+</sup>     | 237. 149   | C14H2204    | Menthane monoterpenoids                    | SLYSUVFUFJMKCV-URFGDBDFSA-N  | O=C (O) C (=CC1C=C (O) C) C1C (C) CO                                                            |
| 1044 | 2. 932 | 418. 23227 | Cilazapril monohydrate (Inhibace)                                                                                       | [M+H] <sup>+</sup>     | 418. 23401 | C22H33N306  | Dipeptides                                 | JQRZBPFGBR1WSN-OKJRKUMDSA-N  | 0=C (O) C1N2C (=O) C (NC (C (=O) OCC) CCC=3C=CC=CC3) CCCC2CCCC1. 0                              |
| 1045 | 2. 936 | 255. 04359 | 3-(5-phenylthiophen-2-yl)prop-2-ynyl Acetate                                                                            | [M-H] <sup>-</sup>     | 255. 04852 | C15H1202S   | 2, 5-disubstituted thiophenes              | QRLHSFULTXQLE-UHFFFAOYSA-N   | O=C (OCC#CC=1SC (=CC1) C=2C=CC=CC2) C                                                           |
| 1046 | 2. 939 | 263. 138   | 8-acetyl-5, 7-dimethoxy-2, 2-dimethylchromene                                                                           | [M+H] <sup>+</sup>     | 263. 13    | C15H1804    | Precocenes                                 | JELWYGQTQBQPH-UHFFFAOYSA-N   | O=C (C1=C (OC) C=C (OC) C=2C=CC (OC21) (C) C) C                                                 |
| 1047 | 2. 939 | 372. 09232 | DTMBOA + O-Hex                                                                                                          | [M-H] <sup>-</sup>     | 372. 0929  | C15H19N010  | Benzoxazinoids                             | WTGXAWKYZMQEDA-UHFFFAOYNA-N  | 0=C2N (O) C=3C=CC (OC) =CC=3 (OC2 (OC1OC (C) C (O) C) C1 (O) ))                                 |
| 1048 | 2. 944 | 144. 08055 | Tryptophanol (not validated)                                                                                            | [M+H-H2O] <sup>+</sup> | 144. 082   | C10H11N0    | Indole and derivatives                     | MBBOMCVGYCRMEA-UHFFFAOYSA-N  | OCCC2=CN=C1CC=CC=C12                                                                            |
| 1049 | 2. 956 | 265. 1185  | Magnolol                                                                                                                | [M-H] <sup>-</sup>     | 265. 12341 | C18H1802    | Biphenyls and derivatives                  | VVOAZFWZEDHOOU-UHFFFAOYSA-N  | OC1=C (C=C (CC=C) C=C1) C1=C (C) C=CC (CC=C) =C1                                                |
| 1050 | 2. 957 | 305. 07678 | Glutamyl-S-(C3H5)-Cysteine sulfoxide                                                                                    | [M-H] <sup>-</sup>     | 305. 07999 | C11H18N206S | Peptides                                   | LMNDKXWMBGGAL-UHFFFAOYNA-N   | O=C (O) C (O) CCC (=O) NC (=O) CS (=O) C=CC                                                     |
| 1051 | 2. 964 | 205. 14316 | 3, 5-dihydroxydecanoic acid                                                                                             | [M+H] <sup>+</sup>     | 205. 14343 | C10H2004    | Medium-chain hydroxy acids and derivatives | WQZRAWSNEARGPV-UHFFFAOYSA-N  | O=C (O) CC (O) CC (O) CCCCC                                                                     |
| 1052 | 2. 983 | 180. 10143 | (S)-3-Amino-4-phenylbutyric acid                                                                                        | [M+H] <sup>+</sup>     | 180. 1019  | C10H13N02   | Beta amino acids and derivatives           | OFVBLKINTLPEGH-VIFFVBQESA-N  | N[C@H] (CC (O) =O) CC1=CC=CC=C1                                                                 |
| 1053 | 2. 986 | 190. 05339 | N-ACETYL-DL-METHIONINE                                                                                                  | [M-H] <sup>-</sup>     | 190. 054   | C7H13N03S   | Methionine and derivatives                 | XUYPXLMDZJIRQH-UHFFFAOYSA-N  | O=C (O) C (NC (=O) C) CCSC                                                                      |
| 1054 | 2. 988 | 285. 1077  | isosakuranetin                                                                                                          | [M-H] <sup>-</sup>     | 285. 10324 | C16H1405    | 4'-O-methylated flavonoids                 | HMUJXQRRKBLVVO-AWEZNCQLSA-N  | O=C1C=2C (O) =CC (O) =CC2OC (C3=CC=C (OC) C=C3) C1                                              |
| 1055 | 2. 99  | 405. 22357 | (E)-Resveratrolside                                                                                                     | [M-H] <sup>-</sup>     | 405. 2236  | C20H2209    | Stilbene glycosides                        | OLCVOESSVCAFGR-CUYWLFDRSA-N  | OC=1C=C (O) C=C (CC2=CC=C (OC3OC (C) C (O) C) C3O) C (O) =C2) C1                                |
| 1056 | 2. 992 | 174. 09094 | 7-methanesulfinylheptanenitrile                                                                                         | [M+H] <sup>+</sup>     | 174. 0956  | C8H15N0S    | Glucosinolate breakdown metabolites        | MVGLREOVTAKNK-UHFFFAOYNA-N   | N#CCCCCCCCS (=O) C                                                                              |
| 1057 | 2. 998 | 192. 10193 | N, N-Diethyl-4-hydroxybenzamide                                                                                         | [M-H] <sup>-</sup>     | 192. 103   | C11H15N02   | Benzamides                                 | WLRVSRJKZYJCJY-UHFFFAOYSA-N  | CCN (CC) C (=O) C1=CC=C (O) C=C1                                                                |
| 1058 | 2. 998 | 190. 08568 | synephrine                                                                                                              | [M+Na] <sup>+</sup>    | 190. 086   | C9H13N02    | 1-hydroxy-2-unsubstituted benzenoids       | YRCWQPVGYLSOX-UHFFFAOYSA-N   | OC1=CC=C (C=C1) C (O) CNC                                                                       |
| 1059 | 3. 002 | 625. 32233 | Dauricine                                                                                                               | [M+H] <sup>+</sup>     | 625. 32001 | C38H44N206  | Benzylisoquinolines                        | AQASRZOCERRGBL-R0JLC1KYSNA-N | OC1=CC=C (C=C1OC2=CC=C (C=C2) CC3C4=CC (OC) =C (OC) C=C4CCN3C) CC5C6=CC (OC) =C (OC) C=C6C7CN5C |
| 1060 | 3. 003 | 352. 16083 | MITOMYCIN C                                                                                                             | [M+H] <sup>+</sup>     | 352. 16153 | C15H18N405  | Mitomycins                                 | NW1BSHFKLJFRCO-WUDYKRTCSA-N  | O=C1C2=C (C (=O) C (N) =C1) C (COC (=N) O) C3 (OC) N2CC4NC43                                    |
| 1061 | 3. 005 | 329. 17172 | (2E)-N-(4-acetamidobutyl)-3-(4-hydroxy-3-methoxyphenyl)prop-2-enamide                                                   | [M+H] <sup>+</sup>     | 329. 17133 | C16H22N204  | Hydroxycinnamic acids and derivatives      | ZVMGKOAHHB1HLO-SOPGYVHQSA-N  | OC (=NCCCCN=C (O) C) C=C1=CC=C (O) C (OC) =C1                                                   |
| 1062 | 3. 008 | 300. 19998 | Dehydroabietamide                                                                                                       | [M+H] <sup>+</sup>     | 300. 19943 | C20H29N0    | Diterpenoids                               | AKKGFKWEDCJQJ-UHFFFAOYSA-N   | N=C (O) C1 (C) CCCC2 (C3=CC=C (C=C3CC12) C (C) C) C                                             |
| 1063 | 3. 012 | 447. 1604  | 2-[2-(4-methyl-2-oxo-2h chromen-7-yl)oxy]acetyl]-2, 3, 4, 9-tetrahydro-1h-heta-carboline-3-carboxylic acid methyl ester | [M+H] <sup>+</sup>     | 447. 16    | C25H22N206  | Beta carbolines                            | WYAYNBDJBJVOP-0AQYLSRUSNA-N  | 0=C1OC=2C=CC (=O) N3CC=4NC=5C=CC5C4OC3C (=O) OC) C=CC2C=C1C                                     |
| 1064 | 3. 012 | 301. 15369 | Pesticide3_Bifenazate.C17H20N203.1-Methylethyl 2-(4-methoxybiphenyl-3-yl)hydrazinecarboxylate                           | [M+H] <sup>+</sup>     | 301. 15399 | C17H20N203  | Biphenyls and derivatives                  | VHLKTXFWDRIX1LV-UHFFFAOYSA-N | OC (=NCC=1C=C (C=CC1OC) C=2C=CC=CC2) OC (C) C                                                   |
| 1065 | 3. 025 | 254. 14897 | Irgarol                                                                                                                 | [M+H] <sup>+</sup>     | 254. 14339 | C11H19N6S   | Methylthio-s-triazines                     | HDHLIWCXDDZUFH-UHFFFAOYSA-N  | CC (C) (C) NC1=NC (=NC2CC2) N=C (N1) SC                                                         |
| 1066 | 3. 033 | 400. 18982 | Thiethylperazine                                                                                                        | [M+H] <sup>+</sup>     | 400. 18756 | C22H29N3S2  | Phenothiazines                             | XTCTYLCDETUOIP-UHFFFAOYSA-N  | CCSC1=CC2=C (SC3=CC=CC=C3N2CCN2CCN (C) CC2) C=C1                                                |
| 1067 | 3. 037 | 284. 0397  | CGS 15943                                                                                                               | [M-H] <sup>-</sup>     | 284. 03445 | C13H8C1N50  | Quinazolinamines                           | MSJODEOZODDVGW-UHFFFAOYSA-N  | C1C=1C=CC=2NC (=N) N3N=C (N=C3C2C1) C=4OC=CC4                                                   |
| 1068 | 3. 039 | 312. 1459  | 7-methoxy-6-(1, 2, 3-trihydroxy-3-methylbutyl)chromen-2-one                                                             | [M+H] <sup>+</sup>     | 312. 14417 | C15H1806    | Coumarins and derivatives                  | PCSZTTAMZGNGNB-UHFFFAOYSA-N  | O=C1OC=2C=C (OC) C (=C2C=C1) C (O) C (O) C (O) C                                                |
| 1069 | 3. 04  | 245. 18495 | Leucylleucine                                                                                                           | [M+H] <sup>+</sup>     | 245. 187   | C12H24N203  | Dipeptides                                 | LCPPYQJ1KPJDLBL-UHFFFAOYNA-N | O=C (O) C (NC (=O) C) CC (C) C                                                                  |
| 1070 | 3. 041 | 283. 09219 | 4-methoxy-9-(2-methylbut-3-en-2-yl) furo[3, 2-g]chromen-7-one                                                           | [M-H] <sup>-</sup>     | 283. 09756 | C17H1604    | 5-methoxypsoralens                         | ZPLVEUISKJ1JDT-UHFFFAOYNA-N  | O=C1OC2=C (C=C1) C (OC) =C3C=OC3=C2C (=C) (C) C                                                 |
| 1071 | 3. 042 | 401. 10739 | Apodanthoside (Not validated)                                                                                           | [M-H] <sup>-</sup>     | 401. 10849 | C17H22011   | Iridoid glycosides                         | QXLZMPXGMPPIPW-UHFFFAOYNA-N  | 0=C (OC) C2=COC (OC1OC (CO) C (O) C) C1 (O) ) C3C (=CC23) C (=O) O                              |
| 1072 | 3. 045 | 262. 11789 | BIOTIN                                                                                                                  | [M+H] <sup>+</sup>     | 262. 12198 | C10H16N203S | Biotin and derivatives                     | YBJHBARHTGYGT-ZKWXUAAHSA-N   | O=C (O) CCCCC1SCC2N=C (O) NC21                                                                  |
| 1073 | 3. 046 | 285. 10678 | Epoxy (4, 5A)alpha)-4, 5-Dihydrosantonin                                                                                | [M+H] <sup>+</sup>     | 285. 10971 | C15H1804    | Eudesmanolides, sesquidesmanolides, and    | GTD1WC1TYRGAKM-ORRHJWQCSA-N  | O=C1OC2C (CCCC (C=CC (=O) C4 (OC243) C) C) C1C                                                  |

|      |        |            |                                                                                                                                                                                                                                                            |                    |            |                           |                                                             |                              |                                                                          |
|------|--------|------------|------------------------------------------------------------------------------------------------------------------------------------------------------------------------------------------------------------------------------------------------------------|--------------------|------------|---------------------------|-------------------------------------------------------------|------------------------------|--------------------------------------------------------------------------|
| 1074 | 3. 051 | 447. 15884 | Gefitinib (Iressa)                                                                                                                                                                                                                                         | [M+H] <sup>+</sup> | 447. 159   | C22H24ClFN4O3             | Quinazolinamines                                            | XGALLCVXEZPNRQ-UHFFFAOYSA-N  | FC1=CC=C(C=C1C1)NC=2N-CN=C3C=C(OC)C(OC(CN4COC3C4)=CC32                   |
| 1075 | 3. 054 | 425. 19089 | 6-Hydroxysumatrol                                                                                                                                                                                                                                          | [M-H] <sup>-</sup> | 425. 19553 | C23H22O8                  | Rotenones                                                   | RMAYNNFCPNGTQW-UHFFFAOYSA-N  | O=C1C2=C(O)C=C3OC(C=C)C(C3)=C2OC4C(O)OC5=CC(OC)=C(OC)C=C(C14)            |
| 1076 | 3. 054 | 420. 14963 | Chloroaustralasine C                                                                                                                                                                                                                                       | [M+H] <sup>+</sup> | 420. 155   | C22H26ClN5O5              | Pyranquinolines                                             | XVDZSHAEMKCIW-DBFNBLSLA-N    | O=C(OCN1C(=O)C2=C(OC(C)(C)C3CC(O)(C)C(C1)C23)C=C4CC=C(C41)C              |
| 1077 | 3. 056 | 350. 12189 | Voriconazole                                                                                                                                                                                                                                               | [M+H] <sup>+</sup> | 350. 12201 | C16H14F3N5O               | Phenylpropanes                                              | BCEHBSKCWLPMON-MGPLVRAMSA-N  | FC1=CC=C(C(F)=C1)C(O)(CN2N-CN=C2)C(C=3N-CN=CC3F)C                        |
| 1078 | 3. 06  | 311. 0321  | Cotarnine Chloride                                                                                                                                                                                                                                         | [M+H] <sup>+</sup> | 311. 0321  | [C12H15ClN4] <sup>-</sup> | Tetrahydroisoquinolines                                     | UONSFNPHCTWRGS-UHFFFAOYSA-M  | [C1-]. OC1C2=C(OC)C=3OC3C=C=C2CCN1C                                      |
| 1079 | 3. 062 | 283. 10977 | 2-(4-oxoquinazolin-3(4H)-yl)ethyl isobutyrate                                                                                                                                                                                                              | [M+H] <sup>+</sup> | 283. 10999 | C14H16N2O3                | Quinazolines                                                | DXZNCVCRUZDRWL-UHFFFAOYSA-N  | O=C(OCN1C=NC=CC=CC2C1=O)C(C)C                                            |
| 1080 | 3. 062 | 237. 07712 | Pesticide5_Metribuzin_C8H14N4O5_4-Amino-6-(2-methyl-2-propanyl)-3-(methylsulfanyl)-1,2,4-triazin-5(4H)-one                                                                                                                                                 | [M+H] <sup>+</sup> | 237. 078   | C8H14N4O5                 | Aryl thioethers                                             | FOFZRZUHNHCZPX-UHFFFAOYSA-N  | O=C1C(=NN=C(SC)N1N)C(C)C(C)C                                             |
| 1081 | 3. 064 | 404. 14612 | _130050                                                                                                                                                                                                                                                    | [M+H] <sup>+</sup> | 404. 147   | C22H23N5O5                | Phenylquinolines                                            | PJPKEOASXRGMD-SIKLNZKXSA-N   | O=C1NC=2C=CC=3C=CC(OC3C2C(O)(C4=CC=C(OC)C=C4)C1OC)(C)C                   |
| 1082 | 3. 074 | 261. 04266 | Methyl 7-Deshydroxyprogallin-4-Carboxylate                                                                                                                                                                                                                 | [M-H] <sup>-</sup> | 261. 04044 | C13H10O6                  | Tropolones                                                  | DQWQITLWUFBXON-UHFFFAOYSA-N  | O=C(OC)C1=CC(=O)C(O)=C2C(O)=C(C)C=CC2=C1                                 |
| 1083 | 3. 074 | 137. 02448 | P-HYDROXYBENZOIC ACID                                                                                                                                                                                                                                      | [M-H] <sup>-</sup> | 137. 02441 | C7H6O3                    | Hydroxybenzoic acid derivatives                             | FJKROLUGYXJWQN-UHFFFAOYSA-N  | OC(=O)C1=CC(=O)C(C)=C1                                                   |
| 1084 | 3. 077 | 216. 08636 | N-(2-furylmethyl)-9H-purin-6-amine                                                                                                                                                                                                                         | [M+H] <sup>+</sup> | 216. 08701 | C10H9N5O                  | 6-alkylaminopurines                                         | QANMHLXAZMSUEX-UHFFFAOYSA-N  | N=1C=NC(NCC=2OC=CC2)=C3N=CNC13                                           |
| 1085 | 3. 088 | 255. 17235 | alpha-Estradiol                                                                                                                                                                                                                                            | [M+H] <sup>+</sup> | 255. 17435 | C18H24O2                  | Estrogens and derivatives                                   | VOXZDWNVPJITMN-AWDGRILASA-N  | CC12CCC3C(CCC4=CC(O)=CC=C34)C1CC([C@H]2O)                                |
| 1086 | 3. 089 | 317. 11163 | Tanshinone IIA                                                                                                                                                                                                                                             | [M+H] <sup>+</sup> | 317. 10999 | C19H18O3                  | Tanshinones, isotanshinones, and 3'-O-methylated flavonoids | HYXITZLLTYIPDF-UHFFFAOYSA-N  | O=C1C(=O)C2=C(C=CC3=C2CCCC3(C)C)=C4OC(C(C14)C                            |
| 1087 | 3. 093 | 301. 12839 | 5, 7-dihydroxy-2-(4-hydroxy-3-methoxyphenyl)-2, 3-dihydrochromen-4-one                                                                                                                                                                                     | [M-H] <sup>-</sup> | 301. 12933 | C16H14O6                  | Flavonoids                                                  | FTDDBIPDXTXRG-UHFFFAOYSA-N   | O=C1C=C2C(O)=CC(O)=CC2OC(C3=CC=CC(O)C(OC)=C3)C1                          |
| 1088 | 3. 093 | 166. 1223  | Hordeanine                                                                                                                                                                                                                                                 | [M+H] <sup>+</sup> | 166. 12    | C10H15NO                  | Phenethylamines                                             | KUBCEEMXQZUPDQ-UHFFFAOYSA-N  | OC1=CC=C(C=C1)CCN(C)C                                                    |
| 1089 | 3. 097 | 285. 12268 | Prolylphenylalanine                                                                                                                                                                                                                                        | [M+H] <sup>+</sup> | 285. 12094 | C14H18N2O3                | Dipeptides                                                  | IWTANZLCJYVEFX-UHFFFAOYSA-N  | O=C(O)C(N=C(O)C1NCCC1)CC=2C=CC=CC2                                       |
| 1090 | 3. 098 | 395. 14761 | Arctigenin                                                                                                                                                                                                                                                 | [M+H] <sup>+</sup> | 395. 147   | C21H24O6                  | Dibenzylbutyrolactone lignans                               | NOQVSMVKKMHTF-JKSUJKBBSA-N   | O=C1OCC(CC2=CC=C(OC)C(OC)=C2)C1CC3=CC=C(C)C(OC)=C3                       |
| 1091 | 3. 114 | 376. 10229 | 1-(3,4-dihydroxyphenyl)-6,7-dihydroxy-1,2-dihydronaphthalene-2,3-dicarboxylic acid                                                                                                                                                                         | [M+H] <sup>+</sup> | 376. 10269 | C18H14O8                  | Aryltetralin lignans                                        | WJMFQMBNLYADA-UHFFFAOYSA-N   | O=C(O)C1=CC=2C=C(O)C(O)=C2C(C3=CC=C(O)C(O)=C3)C1C(=O)                    |
| 1092 | 3. 116 | 486. 18063 | (1S,3R,17S,19S)-3-hydroxy-9,16,16-tetramethyl-8-oxa-14,23,25-triazabentacyclo[7.5.2.0(2,22).0(2,22).0(2,22).0(2,22)hexacos-3aR,3a1S,5S,5aS,10bS)-methyl 6-acetyl-3a-ethyl-2,3,3a,3a1,4,5,5a,6,11,12-decahydro-1H-indolizino[8,1-cd]carbazole-5-carboxylate | [M+H] <sup>+</sup> | 486. 17896 | C26H29N3O4                | 2,2-dimethyl-1-benzopyrans                                  | PYHKDROALAEDE-VKAWXPLSA-N    | O=C1N2CCCC3C(O)=NC14C5(O)C6=CC=C(COC7=C6N=C5C(C)(C)C4C3)C1C              |
| 1093 | 3. 119 | 383. 22815 | (3aR,3a1S,5S,5aS,10bS)-methyl 6-acetyl-3a-ethyl-2,3,3a,3a1,4,5,5a,6,11,12-decahydro-1H-indolizino[8,1-cd]carbazole-5-carboxylate                                                                                                                           | [M+H] <sup>+</sup> | 383. 23001 | C23H30N2O3                | Aspidospermat-type alkaloids                                | DHHWJWGDXKXSV-HFOUZZJZSA-N   | O=C(OC)C1CC2(CC)CCN3CC4(C=5C=CC=CC5N(C(=O)C)C14)C32                      |
| 1094 | 3. 12  | 274. 12805 | phenylglucoside                                                                                                                                                                                                                                            | [M+H] <sup>+</sup> | 274. 12851 | C12H16O6                  | Phenolic glycosides                                         | NEZJDVYDZSTRFS-RMPHRYRLSA-N  | OC1OC(OC=2C=CC2)C(O)C(C)C1O                                              |
| 1095 | 3. 127 | 343. 18509 | 4,5-dihydroxy-4,5,6-trimethyl-2,8-dioxo-13-azatricyclo[8.5.1.0(2,22)hexadec-10-ene-3,7-dione                                                                                                                                                               | [M+H] <sup>+</sup> | 343. 18634 | C16H23NO6                 | Pyrrrolizines                                               | WOPYGCANEAIOEM-UHFFFAOYSA-N  | O=C1OCC2=CCN3CCC(=O)C(=O)C(O)(C)C(O)C(C1)C23                             |
| 1096 | 3. 129 | 317. 1116  | 6-(2-hydroxyethyl)-6,6a-dihydroisindolo[2,1-a]quinazoline-5,11-dione                                                                                                                                                                                       | [M+H] <sup>+</sup> | 317. 10999 | C17H14N2O3                | Indoloquinazolines                                          | CWG1HUKKVIQOGZ-UHFFFAOYSA-N  | O=C1C=C2C=CC=C2C3N1C=4C=CC=CC4(=O)N3COC                                  |
| 1097 | 3. 137 | 253. 16391 | Hexazinone                                                                                                                                                                                                                                                 | [M+H] <sup>+</sup> | 253. 16591 | C12H20N4O2                | Dialkylarylaminines                                         | CAXWKEEDBZRFPE-UHFFFAOYSA-N  | CN(C)C1=NC(N(C2CCC2)C(N1C)=O)=O                                          |
| 1098 | 3. 137 | 286. 13019 | Piperine                                                                                                                                                                                                                                                   | [M+H] <sup>+</sup> | 286. 14001 | C17H19NO3                 | Alkaloids and derivatives                                   | MXWOMOGUJBK1W-YPYC1CBESA-N   | O=C(C=CC=CC1=CC=C2OCC2=C1)N3CCCC3                                        |
| 1099 | 3. 14  | 295. 12747 | bakuchiol                                                                                                                                                                                                                                                  | [M+H] <sup>+</sup> | 295. 12744 | C18H24O                   | Aromatic monoterpenoids                                     | LFYJSSARVMHQJB-QIXNEVBVSA-N  | OC1=CC=C(C=C1)C=CC(C=C)C(C)C=C(C)C                                       |
| 1100 | 3. 145 | 192. 13791 | 4-Methylethcathinone                                                                                                                                                                                                                                       | [M+H] <sup>+</sup> | 192. 138   | C12H17NO                  | Alkyl-phenylketones                                         | ZOXZWYWOECBSH-UHFFFAOYSA-N   | O=C(C1=CC(=C(C=C1)C)C(NC)C                                               |
| 1101 | 3. 163 | 266. 13104 | 8-acetamido-2-methyl-7-oxononanoic acid                                                                                                                                                                                                                    | [M+H] <sup>+</sup> | 266. 13626 | C12H21NO4                 | Medium-chain fatty acids                                    | UALLEVOGEQZKXS-UHFFFAOYSA-N  | O=C(O)C(C)CCCC(=O)C(N=C(O)C)C                                            |
| 1102 | 3. 163 | 682. 36823 | S4:19(P3:17/F1:2)                                                                                                                                                                                                                                          | [M+H] <sup>+</sup> | 682. 37207 | C31H52O15                 | Saccharolipids                                              | NNYRMBHXZJRGU-UHFFFAOYNA-N   | CCCCC(=O)OC1C(OC2(CO)OC(CO)C(OC(C)=O)C2O)OC(CO)C(OC(=O)CCCC)C1OC(=O)CCCC |
| 1103 | 3. 169 | 197. 07062 | benzo[b][1,8]naphthyridin-5-ol                                                                                                                                                                                                                             | [M+H] <sup>+</sup> | 197. 07001 | C12H8N2O                  | Hydroquinolones                                             | DAFMSUZBESPPSV-UHFFFAOYSA-N  | OC1=C2C=CC=NC2=NC=3C=CC=CC31                                             |
| 1104 | 3. 178 | 299. 15927 | 6-Shogaol                                                                                                                                                                                                                                                  | [M+H] <sup>+</sup> | 299. 16    | C17H24O3                  | Shogaols                                                    | OQWKEEDHDMUXEO-BQYQJAHWSA-N  | O=C(C=CCCCC)CCC1=CC=C(O)C(OC)=C1                                         |
| 1105 | 3. 182 | 318. 20459 | Nateglinide (Starlix)                                                                                                                                                                                                                                      | [M+H] <sup>+</sup> | 318. 20599 | C19H27NO3                 | Phenylalanine and derivatives                               | OELFLUMRDSZNSF-BRWVUGUISA-N  | O=C(O)C(NC(=O)C1CCC(C)C(C)C)CC=2C=CC=CC2                                 |
| 1106 | 3. 186 | 160. 03951 | 2, 8-Quinolinediol                                                                                                                                                                                                                                         | [M-H] <sup>-</sup> | 160. 04041 | C9H7NO2                   | Quinolones and derivatives                                  | ZXZKYHTWJHFT-UHFFFAOYSA-N    | OC=1N=C2C(O)=CC=CC2=C1                                                   |
| 1107 | 3. 195 | 476. 22162 | 1-(9-hydroxy-2-isopropyl-10-(2,3,4-trimethoxyphenyl)pyrrolo[3',4'':6,7]azepino[4,3,2-cd]indol-8(2H,7H,10H)-                                                                                                                                                | [M+H] <sup>+</sup> | 476. 22    | C27H29N3O5                | Benzazepines                                                | QAPJG1XRNRPRW-UHFFFAOYSA-N   | O=C(N1C(O)=C2C(=NC3=CC=CC4=C3C(=CN4(C)C)C2C5=CC=C(OC)C(OC)=C5OC)C1)C     |
| 1108 | 3. 2   | 341. 16959 | Cinanserin                                                                                                                                                                                                                                                 | [M+H] <sup>+</sup> | 341. 16821 | C20H24N2O5                | Cinnamic acid amides                                        | RSUVYMGADVGOU-UHFFFAOYSA-N   | OC(=NC1=C=CC1SCCCN(C)C)C=CC=2C=CC=CC2                                    |
| 1109 | 3. 205 | 217. 09842 | 1, 2, 3, 4-tetrahydro-6-methoxy-1-oxo-beta-carboline                                                                                                                                                                                                       | [M+H] <sup>+</sup> | 217. 10001 | C12H12N2O2                | Beta carbolines                                             | PWARHOUWJUADN-UHFFFAOYSA-N   | O=C1NCCC=2C=3C=C(OC)C=C3CCN12                                            |
| 1110 | 3. 205 | 293. 1235  | Glutamylphenylalanine                                                                                                                                                                                                                                      | [M-H] <sup>-</sup> | 293. 12369 | C14H18N2O5                | Amino acids                                                 | XHHOZFPNYFQJL-UHFFFAOYNA-N   | O=C(O)C(N)CCC(=O)NC(C(=O)O)CC1=CC=CC=C1                                  |
| 1111 | 3. 213 | 337. 17365 | Hapalindole D                                                                                                                                                                                                                                              | [M+H] <sup>+</sup> | 337. 17401 | C12H14N2S                 | Bicyclic monoterpenoids                                     | PHWOUZMWNUINO-QAUUQPOASA-N   | S=C=NC1C(C2=CNC=3C=CC=CC32)C(C(=C)C)CCC1(C=C)C                           |
| 1112 | 3. 22  | 438. 23776 | Lunarine                                                                                                                                                                                                                                                   | [M+H] <sup>+</sup> | 438. 23871 | C25H31N3O4                | Macrolactams                                                | Y1WJEBPTHXHQF-L1ML1WGDASA-N  | O=C1CCC23C=CC(O)=NCCC(NCCN=C(O)C)C=CC=4C=CC(OC2C1)=C3C4                  |
| 1113 | 3. 222 | 178. 05336 | Cyclamate                                                                                                                                                                                                                                                  | [M-H] <sup>-</sup> | 178. 05434 | C6H13NO3S                 | Cyclamates                                                  | HCAJEUSONLESMK-UHFFFAOYSA-N  | C1OCC(C)NS(O)(=O)=O                                                      |
| 1114 | 3. 222 | 312. 14291 | Domoic acid                                                                                                                                                                                                                                                | [M+H] <sup>+</sup> | 312. 14301 | C15H21NO6                 | Kainoids                                                    | VZFRNCSOCOPNDB-ZDUSDAASANA-N | O=C(O)CC1C(NCC1C(=CC=CC(C(=O)O)C)C)C(=O)O                                |
| 1115 | 3. 244 | 269. 04083 | (3R)-8-hydroxy-3-(4-methoxyphenyl)-3,4-dihydroisochromen-1-one                                                                                                                                                                                             | [M-H] <sup>-</sup> | 269. 04114 | C16H14O4                  | 2-benzopyrans                                               | DEF1JGJJKEYGS-CQSAC1VSA-N    | O=C1OC(C2=CC=C(OC)C=C2)CC=3C=CC=C(O)C13                                  |
| 1116 | 3. 244 | 187. 18019 | Lupinine                                                                                                                                                                                                                                                   | [M+H] <sup>+</sup> | 187. 18048 | C10H19NO                  | Lupinine-type alkaloids                                     | HDVAWXJVMJBAR-VHSXEESVSA-N   | OC1CCN2CCOCC21                                                           |

|      |       |           |                                                                                                                                                                                      |                    |           |             |                                            |                             |                                                                             |
|------|-------|-----------|--------------------------------------------------------------------------------------------------------------------------------------------------------------------------------------|--------------------|-----------|-------------|--------------------------------------------|-----------------------------|-----------------------------------------------------------------------------|
| 1117 | 3.244 | 283.16461 | Panaxadiol                                                                                                                                                                           | [M+H] <sup>+</sup> | 283.16    | C17H24O2    | Long-chain fatty alcohols                  | D5VMGWEVREYQ-ODQHUEKSA-N    | OC(C#CC#CC(=O)CCCCC)C=C                                                     |
| 1118 | 3.253 | 138.05614 | 2-Pyridylacetic acid                                                                                                                                                                 | [M-H] <sup>-</sup> | 138.05496 | C7H7NO2     | Pyridines and derivatives                  | BPSNETAJDFTO-UHFFFAOYSA-N   | c1ccnc(c1)CC(=O)O                                                           |
| 1119 | 3.253 | 359.23135 | Ochroposinin                                                                                                                                                                         | [M+H] <sup>+</sup> | 359.233   | C21H30N2O3  | Beta carbolines                            | CMGYMWXDJQLJ-DEYYWGMSA-N    | CCCC1CC2C=3NC=4C(OC)C(OC)=CC4C3CN2C1CC                                      |
| 1120 | 3.255 | 112.0389  | 2,3-Dihoxypyridine                                                                                                                                                                   | [M+H] <sup>+</sup> | 112.03931 | C5H5NO2     | Pyridinones                                | GGOZGYRTNRSSA-UHFFFAOYSA-N  | c1cc(c(nc1))O=O                                                             |
| 1121 | 3.261 | 162.05431 | Indole-3-carboxylic acid                                                                                                                                                             | [M+H] <sup>+</sup> | 162.05496 | C9H7NO2     | Indolecarboxylic acids and derivatives     | KMAKOBLIOCQGJP-UHFFFAOYSA-N | O=C(O)C1=CNC=CC=C2C1=C                                                      |
| 1122 | 3.264 | 316.18655 | Nateglinide                                                                                                                                                                          | [M-H] <sup>-</sup> | 316.1918  | C19H27NO3   | Phenylalanine and derivatives              | OELFLUMRDSZNSF-UHFFFAOYNA-N | O=C(O)C(N=C(O)C1CCC(C)C(C)C)CC=CC=CC2                                       |
| 1123 | 3.268 | 154.04942 | 5-Aminosalicylic acid                                                                                                                                                                | [M+H] <sup>+</sup> | 154.04987 | C7H7NO3     | Aminobenzoic acids                         | KBOPZPVLCLAV-UHFFFAOYSA-N   | O=C(O)C1=CC(N)=CC=C1O                                                       |
| 1124 | 3.274 | 167.10629 | Pesticide4_Cyromazine_C6H10N6_Vetrazin                                                                                                                                               | [M+H] <sup>+</sup> | 167.104   | C6H10N6     | N-aliphatic s-triazines                    | LVDK1WDGRHTE-UHFFFAOYSA-N   | N=C1NC(=N)NC(=NC2CC2)N1                                                     |
| 1125 | 3.279 | 229.09686 | Ozagrel                                                                                                                                                                              | [M+H] <sup>+</sup> | 229.097   | C13H12N2O2  | Cinnamic acids                             | SHZKQBHERIJWAO-AATRIKPKSA-N | O=C(O)C(=C1CC=C(C=C1)CN2C=NC=C2                                             |
| 1126 | 3.281 | 145.04991 | 2-Methylglutaric acid                                                                                                                                                                | [M-H] <sup>-</sup> | 145.05063 | C6H10O4     | Methyl-branched fatty acids                | AQYCMVICNBXNA-UHFFFAOYNA-N  | CC(CCC(O)=O)C(O)=O                                                          |
| 1127 | 3.284 | 190.04993 | 5-HYDROXYINDOLEACETATE                                                                                                                                                               | [M-H] <sup>-</sup> | 190.05    | C10H9NO3    | Indole-3-acetic acid derivatives           | DUUGKCCEGLZNO-UHFFFAOYSA-N  | O=C(O)CC1=CNC=CC(=O)C=C21                                                   |
| 1128 | 3.29  | 490.2728  | Delsoline                                                                                                                                                                            | [M+H] <sup>+</sup> | 490.26999 | C25H41NO7   | Aconitane-type diterpenoid alkaloids       | JYBLTQQBEQLEY-DIZROMASANA-N | OC1CCC2(COC)CN(CC)C3C4(O)(CO)C2C1C3C5OC6(OC)CC4(O)C5C6O                     |
| 1129 | 3.292 | 263.13879 | Delsohexital                                                                                                                                                                         | [M+H] <sup>+</sup> | 263.13901 | C14H18N2O3  | Barbituric acid derivatives                | NZXKDXXBHYTKP-UHFFFAOYNA-N  | O=C1NC(O)C(C(=O)N1C)(CC=C)C(C#CC)C                                          |
| 1130 | 3.305 | 352.10245 | Parfumine                                                                                                                                                                            | [M-H] <sup>-</sup> | 352.10706 | C20H19NO5   | Indanones                                  | AINUBWOYIOHGFN-UHFFFAOYSA-N | O=C1C2=C3COC3C=CC(=O)C1C4C5=CC(O)=C(CO)C=C5OC4C                             |
| 1131 | 3.314 | 198.13458 | 2-Hydroxyatrazine                                                                                                                                                                    | [M+H] <sup>+</sup> | 198.13493 | C8H15N5O    | 1,3,5-triazines                            | NFMIMWNQAWNDU-UHFFFAOYSA-N  | CCN=C1NC(=NC(C)C)NC(=N)O                                                    |
| 1132 | 3.315 | 201.0761  | Diethyloxalpropionate                                                                                                                                                                | [M-H] <sup>-</sup> | 201.07684 | C9H14O5     | Gamma-keto acids and derivatives           | NGRAIMFUWGAEU-UHFFFAOYSA-N  | O=C(OCC)C(=O)CCC(=O)OCC                                                     |
| 1133 | 3.317 | 554.26862 | (12bS)-7-(4-ethylphenyl)-12b-methyl-2-(3,4,5-trimethoxybenzyl)-2,3,6,7-tetrahydronaziridinol <sup>1</sup> , 2'-yl-2-hydroxy-3,4-dihydro-1,4-dioxo-1,4-dione                          | [M+H] <sup>+</sup> | 554.27002 | C38H35N3O5  | Beta carbolines                            | WNGVOVMNRJJOX-RULBIHMZSA-N  | O=C1NC2C(C3=C(C=C3)C(=O)C(=O)C=C5C4C2C(=O)N(C)CC6=C(C(=O)C(=O)C)C(=O)C)C1C  |
| 1134 | 3.319 | 167.03412 | 4-Hydroxymandelic acid                                                                                                                                                               | [M-H] <sup>-</sup> | 167.03499 | C8H8O4      | 1-hydroxy-2-unsubstituted benzenoids       | YHXHKYRLYLQTH-UHFFFAOYNA-N  | O=C(O)C(O)C1=C(C=O)C(C)C1                                                   |
| 1135 | 3.326 | 354.11731 | 2-(4a,9,10a-trihydroxy-1-methyl-5,10-dioxo-3,4-dihydro-1H-benzof[3,2-b]pyridine-3-yl)acetic acid                                                                                     | [M+H] <sup>+</sup> | 354.11835 | C16H16O8    | Naphthopyranones                           | JJKCXJIYNIHOS-UHFFFAOYSA-N  | O=C(O)CC1OC(C)C2(O)C(=O)C=CC(=O)C2(O)C1                                     |
| 1136 | 3.326 | 435.18414 | Artocaprin                                                                                                                                                                           | [M-H] <sup>-</sup> | 435.1813  | C26H28O6    | 3-prenylated flavones                      | KRGDFVWQJIMEK-RMKNTFCPSA-N  | COc1c(\C=C\C(C)C)C(C)C(=O)C2C(OC(=C(C(C)C)C)C2=O)C2=CC=C(C)C(=O)C2=O        |
| 1137 | 3.327 | 243.1702  | Isoleucylisoleucine                                                                                                                                                                  | [M-H] <sup>-</sup> | 243.1716  | C12H24N2O3  | Peptides                                   | BCVIOZZGJNOES-UHFFFAOYNA-N  | O=C(O)C(NC(=O)C(N)C(C)CC)C(C)CC                                             |
| 1138 | 3.338 | 217.09648 | Carboline base + 4H, carboxylic acid                                                                                                                                                 | [M+H] <sup>+</sup> | 217.10069 | C12H12N2O2  | Carbolines                                 | FSCNEEGOMTYKY-UHFFFAOYNA-N  | O=C(O)C3NC(=O)C=C(C)C=C1C2=C3                                               |
| 1139 | 3.34  | 251.01828 | FT-thioether                                                                                                                                                                         | [M-H] <sup>-</sup> | 251.01706 | C7H9FSO2S   | PFSA                                       | KVLYLHRZJIPAQE-UHFFFAOYSA-N | O=C(O)C(=O)CCSCC(F)(F)C(F)F                                                 |
| 1140 | 3.348 | 464.2598  | (3S,3'R,3'as,6'S,6aS,6bS,7ar,9R,11bR)-3-hydroxy-3',6',10,11b-tetramethylsino[1,2,3,4,6,6a,6b,7,8,11a-decahydrobenzo[f]fluorene-9,2'-diol                                             | [M+H] <sup>+</sup> | 464.25613 | C27H39NO3   | Jerveratrume-type alkaloids                | CLEXYPLHGJONT-GDMKTYSQSA-N  | O=C1C2=C(C)C3(COC4C(C)C(C)C4)CC2C3C(=O)CC6(C)C=C15                          |
| 1141 | 3.352 | 595.16992 | 5,7-dihydroxy-2-(2-hydroxyphenyl)-3-(1-(2R,3S,4R,5R,6S)-3,4,5-trihydroxy-6-((1-(2R,3S,4S,5S,6S)-3,4,5-trihydroxy-6-methyltetrahydro-2H-pyran-2-ylideneamino)oxy)phenyl)-propan-1-one | [M+H] <sup>+</sup> | 595.16998 | C27H30O15   | Flavonoid-3-O-glycosides                   | BJJCXTDXEJUWIC-RGLPMSMOA-N  | O=C1C(OC2OC(COC3OC(C)C(O)C3O)C(C)C2O)=C(OC(=O)C(=O)C(C)C1)C=C5C(=O)C=C5O    |
| 1142 | 3.352 | 489.13254 | Agusine                                                                                                                                                                              | [M+H] <sup>+</sup> | 489.13    | C22H26O11   | Iridoid O-glycosides                       | GLAGCTACLKIJX-QNAXTHAFSA-N  | O=C(OCC1=CC(O)C2=C=CC(OC3OC(C)C(O)C(C3O)C12)C4=CC=C(O)C=C4                  |
| 1143 | 3.356 | 457.10947 | Naringenin-7-O-beta-D-glucoside                                                                                                                                                      | [M+H] <sup>+</sup> | 457.10999 | C21H20O10   | Flavonoid-7-O-glycosides                   | DLIKSSGEMUFQOK-SFTVRKLSA-N  | O=C1C2=C(O)C=C(OC3OC(C)C(O)C3O)C=C2OC(C4=CC=C(O)C=C4)C1                     |
| 1144 | 3.357 | 455.09698 | Riboflavin-5'-monophosphate                                                                                                                                                          | [M-H] <sup>-</sup> | 455.09735 | C17H21N4O9P | Flavin nucleotides                         | FVTCRASFADXXNN-SCRDCRAPSA-N | CC1=CC2=C(C=C1)N(C[C@H](O)[C@@H](O)[C@H](O)COP(O)(O)=O)C1=NC(=O)N=C(O)C1=N2 |
| 1145 | 3.36  | 180.0291  | DIBOA                                                                                                                                                                                | [M-H] <sup>-</sup> | 180.02921 | C8H7NO4     | Benzoxazinoids                             | COVOPZQCGJUPY-UHFFFAOYNA-N  | O=C1N(O)C2=CC=CC(=O)C1(O)                                                   |
| 1146 | 3.362 | 136.03967 | 4-AMINO BENZOATE                                                                                                                                                                     | [M-H] <sup>-</sup> | 136.03999 | C7H7NO2     | Aminobenzoic acids                         | ALYNCZND1QEVRU-UHFFFAOYSA-N | O=C(O)C1=CC=C(N)C=C1                                                        |
| 1147 | 3.368 | 207.14842 | Pesticide3_Isoproturon_C12H18N2O_Arelon                                                                                                                                              | [M+H] <sup>+</sup> | 207.149   | C12H18N2O   | N-phenylureas                              | PUIYMUZLKQOUZ-UHFFFAOYSA-N  | O=C(NC1=CC=C(C=C1)C(C)C)N(C)C                                               |
| 1148 | 3.371 | 293.10114 | _120106                                                                                                                                                                              | [M+H] <sup>+</sup> | 293.10101 | C15H16O6    | 2-benzopyrans                              | MMHTXATDNFMYU-UHFFFAOYSA-N  | O=C1OC2(C(=CC(O)C(O)C2)C=3C=C(OC)C=C(O)C13)C                                |
| 1149 | 3.375 | 273.21927 | 5-beta-Androstan-17-beta-ol-3-one                                                                                                                                                    | [M+H] <sup>+</sup> | 273.22128 | C19H30O2    | Androgens and derivatives                  | NYKAWKGWV1WPM-NOLKSFPSPA-N  | CC12CCC3(C(C[C@H]4CC(=O)CCC43)C1CC[C@H]52O                                  |
| 1150 | 3.375 | 436.18503 | PHYSTOSTIGMINE SALICYLATE                                                                                                                                                            | [M+H] <sup>+</sup> | 436.18427 | C22H27N3O5  | Pyrroloindoles                             | HZOTZTANVBDFOP-PBQOUBLSA-N  | O=C(O)C1C=CC=CC1O.OC(=NC)OC1=CC=C(C=C1)C3(C)CC(N)C3N2C                      |
| 1151 | 3.381 | 250.09113 | (2E,4E)-N-(2-methylpropyl)-6-thiophen-2-ylhexa-2,4-dienamide                                                                                                                         | [M+H] <sup>+</sup> | 250.09003 | C14H19NO5   | N-acyl amines                              | KNGBFMEGLRFVH-PRKJIMSOSA-N  | OC(=NC(C)C)C=CC(=O)C=C1C                                                    |
| 1152 | 3.386 | 353.16858 | 7-[(2E,5E)-7-hydroxy-3,7-dimethylocta-2,5-dienoxy]chromen-2-one                                                                                                                      | [M+H] <sup>+</sup> | 353.1683  | C19H22O4    | Coumarins and derivatives                  | ZHQPRJMIALLFHX-ATTWORZSA-N  | O=C1OC=2C=C(OC)C(C)CC(=O)C(C)C=C2C2=C1                                      |
| 1153 | 3.388 | 230.11665 | Sebutylazine                                                                                                                                                                         | [M+H] <sup>+</sup> | 230.1167  | C9H16ClN5   | 1,3,5-triazine-2,4-diamines                | BZRUVKZGXNSXMB-UHFFFAOYNA-N | CCN=C1NC(NC(C1)=N)=NC(C)CC                                                  |
| 1154 | 3.397 | 212.12766 | Mescaline                                                                                                                                                                            | [M+H] <sup>+</sup> | 212.12801 | C11H17NO3   | Phenethylamines                            | RHCSKNNOAZULRK-UHFFFAOYSA-N | O(C1C=C(C=C(C(OC)C1OC)CC)C                                                  |
| 1155 | 3.397 | 187.13246 | Royal jelly acid                                                                                                                                                                     | [M+H] <sup>+</sup> | 187.13    | C10H18O3    | Medium-chain hydroxy acids and derivatives | QHBZHVUGROELI-SOFGYVWQSA-N  | O=C(O)C=CCCCCCC                                                             |
| 1156 | 3.398 | 425.1954  | 2-(3,4-dihydroxyphenyl)-5,7-dihydroxy-6,8-dimethoxychromen-4-one                                                                                                                     | [M+H] <sup>+</sup> | 425.1951  | C17H14O8    | 8-O-methylated flavonoids                  | QHMWHJFJTURES-UHFFFAOYSA-N  | O=C1C=C(OC=2C(OC)=C(O)C(C)C(OC)=C3C=C(OC)C=C(C)C3                           |
| 1157 | 3.398 | 324.11081 | Dehydroevodiamine                                                                                                                                                                    | [M+H] <sup>+</sup> | 324.11099 | C19H15N3O   | Quinazolinones                             | VXHSVKJHXSXKM-UHFFFAOYSA-N  | O=C1C=2C=C(=CC2N1)(=C3=C4[N-]C=5C(=O)C=C5C4ACN13)C                          |
| 1158 | 3.415 | 188.06987 | Desethylatrazine                                                                                                                                                                     | [M+H] <sup>+</sup> | 188.06975 | C6H10ClN5   | 1,3,5-triazine-2,4-diamines                | DFWFIQMSFGDQ-UHFFFAOYSA-N   | CC(C)N=C1NC(C1)=NC(=N)N1                                                    |
| 1159 | 3.416 | 151.039   | L-(-)-Mandelic acid                                                                                                                                                                  | [M-H] <sup>-</sup> | 151.04007 | C8H8O3      | Benzene and substituted derivatives        | 1WYDHOAUDTYEUF-SSDOTSWSA-N  | O[C@H](O)C(=O)C1=CC=CC=C1                                                   |

|      |        |            |                                                                                                                                                            |                    |            |               |                                        |                              |                                                                                               |
|------|--------|------------|------------------------------------------------------------------------------------------------------------------------------------------------------------|--------------------|------------|---------------|----------------------------------------|------------------------------|-----------------------------------------------------------------------------------------------|
| 1160 | 3. 421 | 226. 10651 | 6-Benzyladenine                                                                                                                                            | [M+H] <sup>+</sup> | 226. 10899 | C12H11N5      | 6-alkylaminopurines                    | NWEJYWHLCVSVIJ-UHFFFAOYSA-N  | N=1C=NC=2C1NC=NC2NC=3C=C=CC3                                                                  |
| 1161 | 3. 426 | 334. 17429 | convolvicine                                                                                                                                               | [M+H] <sup>+</sup> | 334. 17001 | C18H23N05     | P-methoxybenzoic acids and derivatives | HZE0ENYXYFFIU-QDMKHRRSA-N    | O=C (OC) CC2N (C (=O) C) (CC2) C1 C3=C=C=C (OC) C (OC) C=C3                                   |
| 1162 | 3. 427 | 359. 12326 | 9-methoxy-4, 4-dimethyl-13-phenyl-6, 14-dioxatetracyclo[8. 4. 0. 0 <sup>2</sup> . 2. 0 <sup>2</sup> . 2]tetradeca-1, 7, 9-trien-11-one                     | [M+H] <sup>+</sup> | 359. 12537 | C21H20O4      | Pyranoflavonoids                       | NGRRXMEVSBATO-UHFFFAOYSA-N   | O=C1C2=C (OC) C=C3OC4C (C3=C2OC (C=5C=CC=OC5) C1) C4 (C) C                                    |
| 1163 | 3. 445 | 154. 06151 | L-HISTIDINE                                                                                                                                                | [M-H] <sup>-</sup> | 154. 062   | C6H9N3O2      | Histidine and derivatives              | HNDVDQJC1GZPNO-UHFFFAOYSA-N  | O=C (O) C (N) CC1=CN=CN1                                                                      |
| 1164 | 3. 45  | 411. 17828 | Gomisin J                                                                                                                                                  | [M+H] <sup>+</sup> | 411. 17801 | C22H28O6      | Hydrolyzable tannins                   | PICOUNAPKDEPCA-TXEJJXNPSA-N  | OC1=CC2=C (C (OC)=C1OC) C3=C (OC) C (OC)=C (O) C=C3CC (C) C (C) C2                            |
| 1165 | 3. 45  | 377. 1488  | Vincamine                                                                                                                                                  | [M+H] <sup>+</sup> | 377. 14786 | C21H26N2O3    | Eburnan-type alkaloids                 | RXPRRQKFXBCSJ-G1VPXCGWSA-N   | O=C (OC) C1 (O) N2C=3C=CC=CC34=C2C5N (CC4) CCCC5 (CC) C1                                      |
| 1166 | 3. 458 | 305. 12299 | (2S, 3S)-2-(3, 4, 5-trihydroxyphenyl)-3, 4-dihydro-2H-chromene-3, 5, 7-triol                                                                               | [M-H] <sup>-</sup> | 305. 12299 | C15H14O7      | Epigallocatechins                      | XMOCLSLCDHWDHP-WFASDCNBSA-N  | OC=1C=C (O) C2=C (OC (C3=CC (O) =C (O) C (O) =C3) C (O) C2) C1                                |
| 1167 | 3. 464 | 179. 03427 | Caffeic acid                                                                                                                                               | [M-H] <sup>-</sup> | 179. 03499 | C9H8O4        | Hydroxycinnamic acids                  | KATPRVGONGVQAS-RQOWECAXSA-N  | OC (=O) \C=C/C1=CC (O) =C (O) C=C1                                                            |
| 1168 | 3. 472 | 251. 14108 | Caffeoyl putrescin (isomer of 1060)                                                                                                                        | [M+H] <sup>+</sup> | 251. 1407  | C13H18N2O3    | Caffeic acid and derivatives           | KTNZCYCTXQYEHT-UHFFFAOYSA-N  | O=C (C=CC=1C=CC (O) =C (O) C=1) NCCCCN                                                        |
| 1169 | 3. 476 | 304. 16455 | scopolamine                                                                                                                                                | [M+H] <sup>+</sup> | 304. 16    | C17H21NO4     | Beta hydroxy acids and derivatives     | STECJAGHUSJQJN-KXKVBQCLSA-N  | O=C (OC1CC2N (C) C (C1) C3OC32) C (C=4C=CC=CC4) CO                                            |
| 1170 | 3. 48  | 188. 07005 | 4-hydroxy-4-(pyridin-2-yl)butan-2-one                                                                                                                      | [M+H] <sup>+</sup> | 188. 07001 | C9H11NO2      | Pyridines and derivatives              | NYKHQRHPWDLZTL-UHFFFAOYSA-N  | O=C (C) CC (O) C1=NC=CC=C1                                                                    |
| 1171 | 3. 48  | 194. 11719 | Salsoline                                                                                                                                                  | [M+H] <sup>+</sup> | 194. 11749 | C11H15NO2     | Tetrahydroisoquinolines                | YTPRLBGPZHUPO-UHFFFAOYSA-N   | OC=1C=C2C (-CC1OC) C (NCC2) C                                                                 |
| 1172 | 3. 481 | 346. 22156 | XLR11 N-(4-HYDROXYPENTYL)                                                                                                                                  | [M+H] <sup>+</sup> | 346. 21701 | C21H28FN02    | N-alkylindoles                         | MDPXYRYUGDTVIS-UHFFFAOYSA-N  | O=C (C1=CN (C=2C=CC=CC12) CCCC (O) CP) C3C (C) (C) C3 (C) C                                   |
| 1173 | 3. 483 | 226. 08589 | 2'-Deoxycytidine                                                                                                                                           | [M-H] <sup>-</sup> | 226. 08333 | C9H13N3O4     | Pyrimidine 2'-deoxyribonucleosides     | CKTSBUTUHMZGZ-UHFFFAOYNA-N   | N=C1N=C (O) N (C=C1) C2OC (CO) C (O) C2                                                       |
| 1174 | 3. 492 | 73. 06451  | ETHYL METHYL KETONE                                                                                                                                        | [M+H] <sup>+</sup> | 73. 06479  | C4H8O         | Ketones                                | ZWEHNRKPNVVGH-UHFFFAOYSA-N   | CCC (C) =O                                                                                    |
| 1175 | 3. 497 | 130. 08614 | N-Methyl-L-proline                                                                                                                                         | [M+H] <sup>+</sup> | 130. 08626 | C6H11NO2      | Proline and derivatives                | CWLQUGTUXBTLF-YFKPYBVYSA-N   | CN1CCC[C@H]1C (=O) O                                                                          |
| 1176 | 3. 498 | 587. 33295 | Anthranoyllycotonine                                                                                                                                       | [M+H] <sup>+</sup> | 587. 3327  | C32H46N2O8    | Alkaloids                              | NNDHVDYFEDRMGH-UHFFFAOYNA-N  | CCN1CC2 (CC (=O) C3=C (N) C=CC=C3) CCC (OC) C34C5CC6 (OC) C5C (C (OC6O) C (O) C (OC) C23) C14 |
| 1177 | 3. 498 | 213. 16159 | Caryophyllene [T(-)]                                                                                                                                       | [M+H] <sup>+</sup> | 213. 16136 | C14H22        | Branched unsaturated hydrocarbons      | INOSMBKABLJUL-CHWSQXEYSA-N   | C=C1CC=C (C) CCC2C1CC2 (C) C                                                                  |
| 1178 | 3. 498 | 441. 22687 | Deacetylgedunin                                                                                                                                            | [M+H] <sup>+</sup> | 441. 22714 | C26H32O6      | Limonoids                              | HCEYJYMN1GHPK-DXTZDJJUSA-N   | O=C1OC (C2=COC=C2) C3 (C) CCC4C5 (C=CC (=O) C (C) C5CC (O) C4 (C) C63OC16) C                  |
| 1179 | 3. 498 | 371. 19586 | Splendoline                                                                                                                                                | [M+H] <sup>+</sup> | 371. 19699 | C21H26N2O4    | Strychnos alkaloids                    | PUJOYKCYBTUSK-LQOCACJHSA-N   | O=C (N1C=2C=CC=CC234CCN5OC6 (CC (C6CC530) C14) C) CO                                          |
| 1180 | 3. 5   | 178. 04909 | ABOA                                                                                                                                                       | [M+H] <sup>+</sup> | 178. 05051 | C9H7NO3       | Benzoxazinoids                         | FZAQRVWPQCSGPC-UHFFFAOYSA-N  | O=C1OC2=CC=CC (=O) C=C2 (N1)                                                                  |
| 1181 | 3. 504 | 159. 06555 | Pinelic acid                                                                                                                                               | [M-H] <sup>-</sup> | 159. 06628 | C7H12O4       | Medium-chain fatty acids               | WLJYNTCWHLRURA-UHFFFAOYSA-N  | O=C (O) CCCCC (=O) O                                                                          |
| 1182 | 3. 505 | 154. 08597 | Dopamine                                                                                                                                                   | [M+H] <sup>+</sup> | 154. 08626 | C8H11NO2      | Catecholamines and derivatives         | VYFYTYLLBUKUHU-UHFFFAOYSA-N  | c1cc (c (cc1CCN) O) O                                                                         |
| 1183 | 3. 505 | 297. 18936 | Exemestane                                                                                                                                                 | [M+H] <sup>+</sup> | 297. 185   | C20H24O2      | Androgens and derivatives              | BFY1ZQONLCFLEV-DAELLWXTSA-N  | O=C1C=CC2 (C (=C1) C (=O) CC3CC2C4 (C (=O) CC34) C) C                                         |
| 1184 | 3. 518 | 374. 19846 | Hetisine                                                                                                                                                   | [M-H] <sup>-</sup> | 374. 1973  | C20H27NO3     | Alkaloids                              | PI1WJSAMCEMZ1DO-UHFFFAOYNA-N | CC12CN34CC56CC (=C) C7C (O) C5C3C (CC (O) C1) (C24) C6C7O                                     |
| 1185 | 3. 518 | 356. 09747 | HMBOA + O-Hex                                                                                                                                              | [M-H] <sup>-</sup> | 356. 09811 | C15H19NO9     | Benzoxazinoids                         | PMBZSEOA1OYRMW-UHFFFAOYNA-N  | O=C2NC3=CC=C (OC) C=C3 (OC2 (OC1OC (CO) C (O) C (O) C1 (O) ) )                                |
| 1186 | 3. 523 | 487. 19064 | 2-[1-[4, 5-dihydroxy-3-[ (2S, 3R, 4S, 5S, 6R)-3, 4, 5-trihydroxy-6-(hydroxymethyl)oxan-2-yl]oxovan-2-yl]indol-3-yl]acetic acid                             | [M+H] <sup>+</sup> | 487. 19223 | C21H27NO11    | Indole-3-acetic acid derivatives       | ISMUGWKRUVABAZ-XRKNWZDJJSA-N | O=C (O) CC1=C=CN (C=2C=CC=CC21) C3OC (O) C (O) C3OC4OC (CO) C (O) C (O) C4O                   |
| 1187 | 3. 523 | 344. 25702 | Denudatine                                                                                                                                                 | [M+H] <sup>+</sup> | 344. 26001 | C22H33NO2     | Napelline-type diterpenoid alkaloids   | F1AOWYBS1NDVNF-ARX1JESMSA-N  | OC1C (=C) C2CC134CC5C6 (C) CN (CC) C4C5 (CCCC) C3CC2O                                         |
| 1188 | 3. 525 | 468. 24429 | Penigequinolones A and B (diastereomers) _120177                                                                                                           | [M+H] <sup>+</sup> | 468. 241   | C27H33NO6     | Phenylquinolines                       | CVWJKBJRSXD1W-IUEPNFLLSA-N   | O=C1NC2=CC=C (C=CC3 (CCC (C) (C) CC3) C) C (O) =C2C (O) (C4=CC=C (OC) C=C4) C1OC              |
| 1189 | 3. 526 | 298. 13885 | stepharine                                                                                                                                                 | [M+H] <sup>+</sup> | 298. 14001 | C18H19NO3     | Protoporphines                         | OGJKMZVJJYJWKO-CYBMUJFWSA-N  | O=C1C=CC2 (C=C1) C=3C (OC) =C (OC) C=C4C3C (NCC4) C2                                          |
| 1190 | 3. 527 | 213. 06482 | Harmin                                                                                                                                                     | [M+H] <sup>+</sup> | 213. 06572 | C13H12N2O     | Harmala alkaloids                      | BXNJHAXVSOCGBA-UHFFFAOYSA-N  | N=1C=CC=2C=3C=CC (OC) =CC3NC2C1C                                                              |
| 1191 | 3. 533 | 355. 14783 | Notopterol                                                                                                                                                 | [M+H] <sup>+</sup> | 355. 14999 | C21H22O5      | Terpene lactones                       | BK1ACVAZUK1SOR-MKMNVTDBSA-N  | O=C1OC=2C=C3OC=CC3=C (OCC=C (C) CC (O) C=C (C) C) C2C=C1                                      |
| 1192 | 3. 535 | 239. 14024 | CMF                                                                                                                                                        | [M-H] <sup>-</sup> | 239. 14258 | C12H16O5      | Furanoid fatty acids                   | WMQWQXZMV1ETAO-UHFFFAOYSA-N  | O=C (O) C1=C (OC (=C1C) CCC) CCC (=O) O                                                       |
| 1193 | 3. 536 | 319. 97372 | PFSM-sulfonic acid                                                                                                                                         | [M-H] <sup>-</sup> | 319. 96912 | C5H8F5NO5S2   | PFSA                                   | RNRXRAT1QNUKCT-UHFFFAOYSA-N  | O=S (=O) (O) CCCCN (=O) (=O) C (F) (F) C (F) (F) F                                            |
| 1194 | 3. 538 | 210. 07664 | Methoxytyrosine                                                                                                                                            | [M-H] <sup>-</sup> | 210. 0766  | C10H13NO4     | Amino acids                            | PPDUKDQEHURQC-UHFFFAOYNA-N   | O=C (O) C (N) CC1=CC=C (O) C (OC) =C1                                                         |
| 1195 | 3. 542 | 285. 1329  | Fisetin                                                                                                                                                    | [M-H] <sup>-</sup> | 285. 13168 | C15H10O6      | Flavonols                              | XHEFD1BZL1XQHF-UHFFFAOYSA-N  | O=C1C (O) =C (OC2=CC (O) =CC=C12) C=3C=CC (O) =C (O) C3                                       |
| 1196 | 3. 543 | 289. 15344 | Indole-3-acetyl-L-isoleucine                                                                                                                               | [M+H] <sup>+</sup> | 289. 15466 | C16H20N2O3    | Amino acids                            | WPTUQMUCTVOFW-UHFFFAOYNA-N   | CCC (C) C (N=C (O) CC1=CN2C=CC=CC=C12) C (O) =O                                               |
| 1197 | 3. 543 | 425. 16571 | Pentose-Hexose + C5H9                                                                                                                                      | [M-H] <sup>-</sup> | 425. 16531 | C16H28O10     | Terpene glycosides                     | NYSQJ1JJJAWCE-UHFFFAOYNA-N   | OC2OC (OCC1OC (OCC=C (C) C (O) C (O) C1 (O) ) C (O) C2 (O) )                                  |
| 1198 | 3. 545 | 331. 12976 | SPECTINOMYCIN                                                                                                                                              | [M-H] <sup>-</sup> | 331. 12915 | C14H24N2O7    | 1, 4-dioxanes                          | UNFWIHTNXNPBV-WXKVWSESA-N    | O=C1CC (OC2OC3C (O) (NC) C (O) (NC) C3OC12O) C                                                |
| 1199 | 3. 547 | 302. 10492 | Dimechthlor ESA                                                                                                                                            | [M+H] <sup>+</sup> | 302. 10568 | C13H19NO5S    | Anilides                               | RVSCDW1KJDBFRS-UHFFFAOYSA-N  | COCCN (C (=O) CS (O) (=O) =O) C1=C (C) C=CC=C1C                                               |
| 1200 | 3. 55  | 418. 93854 | Fipronil sulfide                                                                                                                                           | [M-H] <sup>-</sup> | 418. 93652 | C12H4C12F6N4S | Phenylpyrazoles                        | FQXWEKADCSXYOC-UHFFFAOYSA-N  | C1=C (C=C (C (=C1C1) N2C (=C (C (CN) =N2) SC (F) (F) F) N) C1) C (F) (F) F                    |
| 1201 | 3. 563 | 261. 14432 | Isoleucylglutamate                                                                                                                                         | [M+H] <sup>+</sup> | 261. 14429 | C11H20N2O5    | Dipeptides                             | KTGPOCFYOZQVRJ-UHFFFAOYNA-N  | O=C (O) CC (NC (=O) C (N) C (C) C) C (=O) O                                                   |
| 1202 | 3. 564 | 363. 11801 | (4R, 6S, 8S, 9Z, 11E)-16-chloro-17, 19-dihydroxy-4-methyl-3, 7-dioxatricyclo[13. 4. 0. 0 <sup>2</sup> ]nonadeca-1 (15), 9, 11, 16, 18-pentaene-2, 13-dione | [M-H] <sup>-</sup> | 363. 1167  | C18H17ClO6    | Hydroxybenzoic acid derivatives        | WYZWZEGROGVYHK-RFJJWQTDSA-N  | O=C1OC (C) CC2OC2=CC=CC (=O) CC=3C (C1) =C (O) C=C (O) C13                                    |

[illegible]

|      |        |            |                                                                                                                                                                               |                      |            |              |                                             |                             |                                                                                          |
|------|--------|------------|-------------------------------------------------------------------------------------------------------------------------------------------------------------------------------|----------------------|------------|--------------|---------------------------------------------|-----------------------------|------------------------------------------------------------------------------------------|
| 1246 | 3. 697 | 584. 33673 | Shearinine_F_120146                                                                                                                                                           | [M+H] <sup>+</sup>   | 584. 33899 | C37H45N05    | Naphthopyrans                               | QYRAHJVRFPI1QW-MHXJJHONSA-N | O=C1C=C2C3(OC1C(03)(C)C)CC4(C)C2(0)CCC5C=6C=7C=C8C(=C7)N(C6C54C)C9=C(C8)C(OC(C)C)C9(C)C  |
| 1247 | 3. 697 | 359. 16888 | tabersonine                                                                                                                                                                   | [M+H] <sup>+</sup>   | 359. 17001 | C21H24N2O2   | Plumeran-type alkaloids                     | FMGGIPWAZSFRCN-HEMCJLEPSA-N | O=C(OC)C1=C2N=C3C=C=C=CC24CN5C=CC(C1)(CC)C54                                             |
| 1248 | 3. 708 | 265. 08093 | (S)-3-(4-hydroxyphenyl)chroman-7-ol                                                                                                                                           | [M+H] <sup>+</sup>   | 265. 07999 | C15H14O3     | Isoflavanols                                | ADFCQWZHKSPAJ-GPCVVEGCSA-N  | OC1=CC=C(C=C1)C2OC3=CC(0)=CC=C3C2                                                        |
| 1249 | 3. 71  | 439. 29025 | Ochrolifunaine A                                                                                                                                                              | [M+H] <sup>+</sup>   | 439. 28601 | C29H34N4     | Harmala alkaloids                           | BYHWAEE1GYEBJ-QJTMEEXSA-N   | C=1C=CC2=C(1)NC3=C2CCN3CC4CC5C=6N=C=7C=CC=CC76CCN5CC4CC                                  |
| 1250 | 3. 711 | 221. 091   | 2-amino-3-(5-hydroxy-1H-indol-3-yl)propanoic acid                                                                                                                             | [M+H] <sup>+</sup>   | 221. 09    | C19H22N2O    | Eburnan-type alkaloids                      | WYJAPUKIYAZSEM-MOPGFXCFSA-N | O=C1NC2=C3C=CC=C3C4=C2C5N(CC4)CCCC5(C1)CC                                                |
| 1251 | 3. 719 | 383. 16577 | Isolaserpitin                                                                                                                                                                 | [M+H] <sup>+</sup>   | 383. 16812 | C19H20O6     | Angular pyranocoumarins                     | KJWF0HVSTFGWZ-YHYXMQVSA-N   | O=C1OC2=C(C=C1)C=C=3OC(C)C(OC(=O)C(=CC)C(C)C)C32                                         |
| 1252 | 3. 719 | 405. 18011 | reserpine                                                                                                                                                                     | [M+H] <sup>+</sup>   | 405. 17999 | C22H26N2O4   | Yohimbine alkaloids                         | KXEMQGRZUWJJS-RXR0KKEWSA-N  | O=C(OC)C1=COC(C)C2CN3CCC=4C=5C=CC(OC)=CC5NC4C3OC12                                       |
| 1253 | 3. 72  | 183. 09167 | Harman                                                                                                                                                                        | [M+H] <sup>+</sup>   | 183. 09167 | C12H10N2     | Harmala alkaloids                           | PSFDQSOQUJVVGF-UHFFFAOYSA-N | CC1=C2NC3=CC=CC=C3C2=CC=N1                                                               |
| 1254 | 3. 734 | 227. 07654 | aspernigrin A                                                                                                                                                                 | [M-H] <sup>-</sup>   | 227. 0789  | C13H12N2O2   | Nicotinamides                               | RIUZDCZRFRLJFC-UHFFFAOYSA-N | O=C1C=C(NC=C1C(=N)O)CC=2C=CC=CC2                                                         |
| 1255 | 3. 735 | 106. 06487 | 3-Methylthiopropylamine                                                                                                                                                       | [M+H] <sup>+</sup>   | 106. 0685  | C4H11NS      | Dialkylthioethers                           | KKYSBGWCYXOHA-UHFFFAOYSA-N  | S(C)CCCN                                                                                 |
| 1256 | 3. 736 | 593. 15002 | Apigenin-6-C-glucoside-7-O-glucoside                                                                                                                                          | [M-H] <sup>-</sup>   | 593. 15118 | C27H30O15    | Flavone C, O-glycosides                     | HGUVPEBGCAVWD-UHFFFAOYNA-N  | O=C2C=C(OC=3C=C(OC1OC(CO)C(O)C1(O)C)C(=C(O)C2=3)C4O(C(CO)C(CO)C(C)C4(O)C5=C(C=C(C)C)C=C5 |
| 1257 | 3. 744 | 152. 07027 | Acetaminophen                                                                                                                                                                 | [M+H] <sup>+</sup>   | 152. 0706  | C8H9NO2      | 1-hydroxy-2-unsubstituted benzenoids        | RZVJ1NKP0RJJF-UHFFFAOYSA-N  | CC(=N)C(=O)O                                                                             |
| 1258 | 3. 746 | 323. 14667 | 1-[4,5-bis(hydroxymethyl)-3-methoxy-2-methylphenoxy]-3-methylbutane-2,3-diol                                                                                                  | [M+H] <sup>+</sup>   | 323. 14648 | C15H24O6     | Benzyl alcohols                             | MAQMSUGBC1GLJ-UHFFFAOYSA-N  | OC1=CC(OC(C)C(C)C)C(OC)=C1OO)C                                                           |
| 1259 | 3. 746 | 584. 34082 | Shearinine_A_120147                                                                                                                                                           | [M+H] <sup>+</sup>   | 584. 34003 | C37H45N05    | Naphthopyrans                               | YAGQ1ZPAJNEIKG-KBCUGRHSA-N  | O=C1C=C2C3(OC1C(03)(C)C)CC4(C)C2(0)CCC5C=6C7=C8C(=C7)N(C6C54C)C9=C(C8)C(OC(C)C)C9(C)C    |
| 1260 | 3. 748 | 421. 24219 | (1, 9, 9b-trihydroxy-6, 6, 9a-trimethyl-3, 5, 5a, 7, 8, 9-hexahydro-1H-benzo[el]2[1h]benzofuran-5-yl)-hexanoate                                                               | [M+H] <sup>+</sup>   | 421. 24319 | C21H34O6     | Naphthofurans                               | GFMG0VRF0OAFMN-UHFFFAOYSA-N | O=C(OC1C=C2COC(0)C2(0)C3(C)C(OC)C(C)C13)CCCC                                             |
| 1261 | 3. 748 | 317. 15945 | (2S, 3S)-2-(3, 4-dihydroxyphenyl)-3, 5, 7-trihydroxy-6-methyl-2, 3-dihydrochromen-4-one                                                                                       | [M-H] <sup>-</sup>   | 317. 16092 | C16H14O7     | Flavanonols                                 | KPCWZLBRHGXPFV-CYEARBPZSA-N | O=C1C2=C(C)C(=C(C)C)C=C2OC(C3=CC=C(C)C(OC)=C3)C1O)C                                      |
| 1262 | 3. 754 | 310. 12711 | Ketotifen                                                                                                                                                                     | [M+H] <sup>+</sup>   | 310. 12601 | C19H19NO5    | Cycloheptathiophenes                        | ZCVMWBYGMWGHF-UHFFFAOYSA-N  | O=C1C=C2SC=C2C(C=3C=CC=CC3C1)=C4CCN(C)CC4                                                |
| 1263 | 3. 756 | 565. 15277 | methyl (2S, 3R, 4S)-3-ethenyl-4-[(2-(3, 4, 5-trihydroxybenzoyl)oxyethyl]-2-[3, 4, 5-trihydroxy-6-(hydroxymethyl)oxan-2-yl]oxy-3, 4-dihydro-2H-pyran-5-11A-Acetoxyprogesterone | [M+H] <sup>+</sup>   | 565. 15277 | C24H30O14    | Terpene glycosides                          | SMTKSCLXONVGL-FMDXMRPMSA-N  | O=C(OC)C1=CC(OC2OC(CO)C(C)C2O)C(C=C(C)C1)CCCC(=O)C3=CC(O)C(C)C3                          |
| 1264 | 3. 758 | 373. 24261 | 11A-Acetoxyprogesterone                                                                                                                                                       | [M+H] <sup>+</sup>   | 373. 23734 | C23H32O4     | Glucoc/mineralocorticoids, progestogens and | IWRPVTXREYVBT-QHXRXISESA-N  | O=C(OC1CC2(C)C(C(=O)CCC2C3CCC=CC(=O)CC4(C)C13)C                                          |
| 1265 | 3. 758 | 192. 06592 | Actrarit                                                                                                                                                                      | [M-H] <sup>-</sup>   | 192. 06662 | C10H11NO3    | Benzene and substituted derivatives         | MROJXXOCABQVEF-UHFFFAOYSA-N | O=C(OC)CC1=CC=C(N=C(C)C)C=C1                                                             |
| 1266 | 3. 759 | 355. 10211 | Feruloyl Hexoside (isomer of 847)                                                                                                                                             | [M-H] <sup>-</sup>   | 355. 1022  | C16H20O9     | Ferulic acid and derivatives                | JWRQVQWBNRGPK-UHFFFAOYNA-N  | O=C(OC1OC(CO)C(C)C(OC)C1(O)C)C=CC=CC(OC)=C(OC)C=C2                                       |
| 1267 | 3. 76  | 358. 24216 | diacetylsongorine                                                                                                                                                             | [M+H] <sup>+</sup>   | 358. 23999 | C22H31NO3    | Napelline-type diterpenoid alkaloids        | CDOSLVQFGANTL-DWPYZRQCSA-N  | O=C1CC2C3(CCC1C(C)C3O)C4CC5C6(C)CN(C6)C4C25C(OC)CC6                                      |
| 1268 | 3. 763 | 147. 04362 | Coumaric acid (isomer of 189, 194)                                                                                                                                            | [M+H2O] <sup>+</sup> | 147. 0443  | C9H8O3       | Coumaric acid and derivatives               | NSWKAQJWESNS-UHFFFAOYSA-N   | O=C(C)C=CC1=C(C)C(OC)=C1                                                                 |
| 1269 | 3. 763 | 335. 15857 | triptophenolide                                                                                                                                                               | [M+H] <sup>+</sup>   | 335. 16    | C20H24O3     | Oxosteroids                                 | KPX1BWGPZSPARK-PXNSMCTSA-N  | O=C1OCC2=C1CC3(C4=C=C(C(OC)=C4)CC(C23)C(C)C)C                                            |
| 1270 | 3. 773 | 313. 11658 | 5, 7-dimethoxy-3-(4-methoxyphenyl)-4H-chromen-4-one                                                                                                                           | [M+H] <sup>+</sup>   | 313. 10999 | C18H16O5     | 7-O-methylisoflavones                       | PVORTURQBPBPF-UHFFFAOYSA-N  | O=C1C=C(COC2=CC(OC)=CC(OC)=C2)C=3C=CC(OC)=CC3                                            |
| 1271 | 3. 778 | 399. 18561 | 4-hydroxy-9-(4-hydroxy-3, 6-dimethoxyphenyl)-5a, 6, 8a, 9-tetrahydro-5H-[2]benzofuro[5, 6-f][1, 3]benzodioxol-8-one                                                           | [M-H] <sup>-</sup>   | 399. 1853  | C21H20O8     | Lignan lactones                             | JGGWNGRBJWAOC-UHFFFAOYSA-N  | O=C1OCC2CC3(C)C(=O)C4OCOC4=C3C(C5=C(C)C(OC)=C5)C=C12                                     |
| 1272 | 3. 781 | 241. 09642 | Cyanazine                                                                                                                                                                     | [M+H] <sup>+</sup>   | 241. 0963  | C9H13ClN6    | Aminotriazines                              | MZZBPKVEFVLFF-UHFFFAOYSA-N  | CCN=C1NC(NC(C)C)C(=N)C(C1)=N1                                                            |
| 1273 | 3. 794 | 593. 15302 | 2-(3, 4-dihydroxyphenyl)-5-hydroxy-7-[(2S, 3R, 4S, 5S, 6R)-3, 4, 5-trihydroxy-6-[[[(2R, 3R, 4R, 5R, 6S)-3, 4, 5-trihydroxy-6-methylloxan-2-yl]oxymethyl]loxan-2-              | [M-H] <sup>-</sup>   | 593. 1524  | C27H30O15    | Flavonoid-7-O-glycosides                    | MGYBYJXAXUBTQF-FOBVWLSUSA-N | O=C1C=C(OC2=CC(OC3OC(COC4OC(C)C(OC)C4O)C(OC)C(OC)C3O)=CC(OC)=C12)C=C5C=CC(OC)=C(OC)C5    |
| 1274 | 3. 797 | 432. 27969 | veratramine                                                                                                                                                                   | [M+H] <sup>+</sup>   | 432. 28    | C27H39NO2    | Fluorenes                                   | MALFOD1CPS1XPO-AZAJSESZSA-N | OC1CC2=CCC3C4=CC=C(C(=C4)CC3C2(C)CC1)C(C)C(C5NCC(C)CC5O                                  |
| 1275 | 3. 814 | 373. 16257 | 4-[2-(2, 6-dimethoxy-4-prop-2-enylphenoxy)-1-hydroxypropyl]-2-methoxyphenol                                                                                                   | [M-H] <sup>-</sup>   | 373. 16565 | C21H26O6     | Lignans, neolignans and related compounds   | ULZFTGWPHYGLI-UHFFFAOYSA-N  | OC1=C=C(C=C1)OC(C)C(OC2=C(C)C(OC)=C(C2OC)CC=C(C)C                                        |
| 1276 | 3. 815 | 374. 22787 | SH373-1                                                                                                                                                                       | [M+H] <sup>+</sup>   | 374. 229   | C17H31N3O6   | Peptides                                    | UKFUHWPKCYQQR-UHFFFAOYSA-N  | O=C(C)C(N=C(C)C(N=C(C)CCC(N)C(=O)C(C)C)CC(C)C                                            |
| 1277 | 3. 815 | 324. 11893 | Tetrahydrocoptisine                                                                                                                                                           | [M+H] <sup>+</sup>   | 324. 12    | C19H17NO4    | Protoberberine alkaloids and derivatives    | UXYJCYXWJGAKQY-OAHLLOKOSA-N | O1C2=CC=C3C(=C2OC1)CN4CC5=CC=6OOC6C=C5C4C3                                               |
| 1278 | 3. 821 | 226. 14308 | Terbutaline                                                                                                                                                                   | [M+H] <sup>+</sup>   | 226. 14377 | C12H19NO3    | Resorcinols                                 | XWYYSIMOBUGWOL-UHFFFAOYNA-N | CC(C)C(NCC(OC)C1=CC(OC)=CC(OC)=C1                                                        |
| 1279 | 3. 823 | 504. 29684 | andrastin A                                                                                                                                                                   | [M+H] <sup>+</sup>   | 504. 29556 | C28H38O7     | Steroid esters                              | GRBXNADBNJGZRR-GJEDHNSHSA-N | O=CC12CCC(OC(=O)C(C)C(C)C2)CC3(C)C1C=C(C)C4(C(=O)C(C(=O)C43C(=O)OC)C1C                   |
| 1280 | 3. 823 | 362. 21054 | Octocrylene                                                                                                                                                                   | [M+H] <sup>+</sup>   | 362. 21146 | C24H27NO2    | Diphenylmethanes                            | FMJSMJQBSVNSBF-UHFFFAOYNA-N | CCCC(C)COC(C(C#N)=C(C1=CC=CC=C1)C2=CC=CC=C2)=O                                           |
| 1281 | 3. 823 | 223. 15576 | Tetraglyme                                                                                                                                                                    | [M+H] <sup>+</sup>   | 223. 15401 | C10H22O5     | Dialkyl ethers                              | ZUHZGEOKBGKPSW-UHFFFAOYSA-N | COCOCOCOCOCOCOC                                                                          |
| 1282 | 3. 824 | 506. 23178 | 3, 15-dibenzyl-1, 4, 12-trimethyl-1, 4, 7, 10, 13-pentazacyclopentadecane-2, 5, 8, 11, 14-pentone                                                                             | [M-H] <sup>-</sup>   | 506. 23819 | C27H33N5O5   | Macrolactams                                | MS1MMLAIWYFPLY-UHFFFAOYSA-N | O=C1N(C)C(C(=O)N(C)C(C(OC)=NC(C(OC)=NCC(C)C(OC)=2C=C(C(OC2)C)=3C=C(C)C                   |
| 1283 | 3. 826 | 384. 17468 | Quetiapine                                                                                                                                                                    | [M+H] <sup>+</sup>   | 384. 17401 | C21H25N3O2S  | Dibenzothiazepines                          | ROKOMYMAXPYNW-UHFFFAOYSA-N  | OCOCOCN1CCN(C2=NC=3C=CC=CC3SC=4C=CC=CC42)CC1                                             |
| 1284 | 3. 827 | 300. 14331 | Metoclopramide                                                                                                                                                                | [M+H] <sup>+</sup>   | 300. 14734 | C14H22ClN3O2 | Aminophenyl ethers                          | TTWJBBZEZQ1CB1-UHFFFAOYSA-N | CCN(CC)CCN(C)C1=C(OC)C=C(N)C(C1)=C1                                                      |
| 1285 | 3. 827 | 246. 11154 | resveratrol                                                                                                                                                                   | [M+H] <sup>+</sup>   | 246. 11246 | C14H12O3     | Stilbenes                                   | LURKXSALWPMMSZ-OWJBTEDSA-N  | OC1=CC=C(C=C1)C=C(C=C1)C=C(C(OC)=C(C)C)C2                                                |
| 1286 | 3. 828 | 121. 02873 | 2-Hydroxybenzaldehyde                                                                                                                                                         | [M-H] <sup>-</sup>   | 121. 0295  | C7H6O2       | Hydroxybenzaldehydes                        | SMQUZDBALYZAC-UHFFFAOYSA-N  | O=C=C1C=CC=CC1O                                                                          |
| 1287 | 3. 834 | 299. 12369 | angoletin                                                                                                                                                                     | [M-H] <sup>-</sup>   | 299. 12888 | C18H20O4     | 2'-Hydroxy-dihydrochalcones                 | HBRYKWADRULLHU-UHFFFAOYSA-N | O=C(C(=C(C)C)=C(C)C(OC)C(C)C)CCC=2C=CC=CC2                                               |
| 1288 | 3. 838 | 281. 03995 | Pseudobaptigenin                                                                                                                                                              | [M-H] <sup>-</sup>   | 281. 04553 | C16H10O5     | Isoflavones                                 | KNJNBK1NYHZUGC-UHFFFAOYSA-N | OC1=CC=C2C(=O)C(=C(C2=C1)C1=CC2=C(C(OC2)C)C=C1                                           |

|      |       |           |                                                                                                                                     |                    |           |                          |                                                  |                               |                                                                                            |
|------|-------|-----------|-------------------------------------------------------------------------------------------------------------------------------------|--------------------|-----------|--------------------------|--------------------------------------------------|-------------------------------|--------------------------------------------------------------------------------------------|
| 1289 | 3.839 | 335.11554 | (E)-3-hydroxy-6-(4-hydroxy-6-methoxy-7-methyl-3-oxo-1H-2-benzofuran-5-yl)-4-methylhex-4-enoic acid                                  | [M-H] <sup>-</sup> | 335.11362 | C17H2007                 | Phthalides                                       | OGJCZLO1KMTMKF-XBXARRHUSA-N   | O=C1OCC2=C1C(O)=C(C(OC)=C2C)CC=C(C(C)O)CC(=O)O                                             |
| 1290 | 3.84  | 364.14859 | (+)-Corypalmine                                                                                                                     | [M+H] <sup>+</sup> | 364.14999 | C20H23N04                | Protoberberine alkaloids and derivatives         | BM CZTYDZHNTKPR-MRXNPFEDSA-N  | OC1=C2C(=CC1OC)C3N(C4=C(OC)C(OC)=CC=C4C3)CC2                                               |
| 1291 | 3.84  | 123.04374 | 3-Hydroxybenzaldehyde                                                                                                               | [M+H] <sup>+</sup> | 123.04405 | C7H602                   | Hydroxybenzaldehydes                             | IAVREABSGIHHMO-UHFFFAOYSA-N   | O=C=O=C=CC(=O)C1                                                                           |
| 1292 | 3.845 | 372.04974 | Glucanapin (3-butenylglucosinolate)                                                                                                 | [M-H] <sup>-</sup> | 372.05542 | C26H4409                 | Medium-chain fatty acids                         | MINDHVHHQZYEEK-HBBNESRPSA-N   | O=C(O)CCCCCCCC(=O)C=C(C(OC)CC1OCC(C2COC2C(C)O)C(C)O)C1O                                    |
| 1293 | 3.849 | 303.19116 | Hesperetin                                                                                                                          | [M+H] <sup>+</sup> | 303.19211 | C16H1406                 | 4'-O-methylated flavonoids                       | A1ONOLUJ1ZLMTK-AWEZNCLSA-N    | O=C1C=2C(O)=CC(O)=CC2OC(2C=CC=C(OC)C(O)=C3)C1                                              |
| 1294 | 3.855 | 322.10635 | methyl 1-oxo-2-(o-tolyl)-1,2,3,6,7,7a-hexahydro-3a,6-epoxyisoindole-7-carboxylate                                                   | [M+H] <sup>+</sup> | 322.10501 | C17H17N04                | Phenylpyrrolidines                               | NDOPUHIEVZKCTM-UHFFFAOYSA-N   | O=C(OC)C1C2OC3(C=C2)CN(C(=O)C13)C=4C=CC=CC4C                                               |
| 1295 | 3.865 | 129.05515 | Ketoleucine                                                                                                                         | [M-H] <sup>-</sup> | 129.05573 | C6H1003                  | Short-chain keto acids and derivatives           | BKAJNAXTPSGJCU-UHFFFAOYSA-N   | O=C(O)C(=O)CC(C)C                                                                          |
| 1296 | 3.866 | 506.26962 | (2E,6E,11E)-18-(2,6-dioxopiperidin-4-yl)-9,13-dihydroxy-8-methoxy-10,12,14-trimethyl-15-oxooctadeca-2,6,11-trienoic acid            | [M-H] <sup>-</sup> | 506.27161 | C27H41N08                | Linoleic acids and derivatives                   | HJCZOTBHYAPUHT-XHOLQ0DBSA-N   | O=C(O)C=CCCCC(OC)C(O)C(C=C(C)C)C(C)C(=O)CCCC1CC(=O)N=C(O)C1)C(C                            |
| 1297 | 3.866 | 434.1893  | (7,8-dimethoxy-2,2,3-trimethyl-2,3-dihydro-1H-benzodiazepin-4-yl) (3,4-dimethoxyphenyl)methanone                                    | [M+H] <sup>+</sup> | 434.19    | C24H29N05                | Benzazepines                                     | 11NU1ABWYMTUJM-UHFFFAOYSA-N   | O=C(C1=CC=C(C(OC)=C1)C2=CC=CC(OC)C(C(OC)=CC3CC(N2C)C)C                                     |
| 1298 | 3.869 | 241.11798 | Pyrogulutamyl-Isoleucine                                                                                                            | [M-H] <sup>-</sup> | 241.11909 | C11H18N204               | Peptides                                         | MKCVLTRITQNGQJ-UHFFFAOYNA-N   | O=C(O)C(NC(=O)C1NC(=O)CC1)C(C)CC                                                           |
| 1299 | 3.881 | 283.12076 | verruculotoxin                                                                                                                      | [M+H] <sup>+</sup> | 283.12073 | C15H20N20                | Alpha amino acid amides                          | CUANCTHYEDWUMU-KBPBESRZSA-N   | OC1=NC(CC=2C=CC=CC2)CN3CCCCC13                                                             |
| 1300 | 3.885 | 197.15053 | (2E)-3,7-dimethyl-2,6-octadienyl acetate                                                                                            | [M+H] <sup>+</sup> | 197.14999 | C12H2002                 | Fatty alcohol esters                             | HIQQPQRQ1QDZMP-DHZHJOJOSA-N   | O=C(OC=C(C)CCC=C(C)C)C                                                                     |
| 1301 | 3.885 | 508.28674 | deltaline                                                                                                                           | [M+H] <sup>+</sup> | 508.29001 | C27H41N08                | Aconitane-type diterpenoid alkaloids             | DTTPWCNKMTQTE-TYNNPWLESA-N    | O=C(OC1C2C3(C)CN(C)C4C51OOC6SCC(OC)C7OC(O)C6C7OC)C42C(OC)CC3)C                             |
| 1302 | 3.885 | 541.17786 | gossypol                                                                                                                            | [M+H] <sup>+</sup> | 541.17999 | C30H3008                 | Sesquiterpenoids                                 | QBKSWRVYCFDQOT-UHFFFAOYSA-N   | O=CC1=C(O)C(O)=C(C2=CC(=C(C)C)=C12)C3=C(O)C4=C(C=O)C(C(O)=C(O)C=C4C3C2)C(C)C(C)C(C         |
| 1303 | 3.885 | 300.1803  | Rinderine                                                                                                                           | [M+H] <sup>+</sup> | 300.18054 | C15H25N05                | Alkaloids                                        | SFVVQRJOGUKCEG-UHFFFAOYNA-N   | CC(C)C(O)C(C)O)C(=O)CC1=CC2CCC(O)C12                                                       |
| 1304 | 3.887 | 363.17471 | [5-acetyloxy-3-(hydroxymethyl)-2-oxo-6-propan-2-ylcyclohex-3-en-1-yl] 3-methylpentanoate                                            | [M+H] <sup>+</sup> | 363.1778  | C18H2806                 | Menthane monoterpenoids                          | MPXXS1CHRNCHHK-UHFFFAOYSA-N   | O=C(OC1C=C(C(=O)C(OC(=O)CC(C)C)C1C(C)C)O)C                                                 |
| 1305 | 3.892 | 492.25519 | Imatinib                                                                                                                            | [M-H] <sup>-</sup> | 492.25174 | C29H31N70                | Benzanilides                                     | KTUFNOKBVMGRW-UHFFFAOYSA-N    | O=C(NC1=CC=C(C(=C1)NC=2N=CC(=N2)C3=CN=CC(=C3)C)C4=CC=C(C(=C4)CN5CCN(C)CC5                  |
| 1306 | 3.897 | 311.10065 | (3S,3'R)-3'-(3-hydroxyphenyl)-4-methylspiro[1H-1,4-benzodiazepine-3,2'-oxetane]-1,5-dione                                           | [M+H] <sup>+</sup> | 311.10263 | C17H14N204               | 1,4-benzodiazepines                              | BDDNYDPRCDQJQ-PBHCJAKSA-N     | O=C1C=2C=CC=C2N=C(O)C3(OC3=4C=CC=C(O)C4)N1C                                                |
| 1307 | 3.9   | 282.16809 | judaicin (eudesmane naphthofuran)                                                                                                   | [M+H] <sup>+</sup> | 282.16998 | C15H2004                 | Eudesmanolides, secoeudesmanolides, and          | NGPDZEAC1WDCX-WUDKMPASANA-N   | O=C1OC2C(CCC3(C(=O)C=C(O)C(C)23)C)C1C                                                      |
| 1308 | 3.901 | 370.17041 | N-methylglaucaine                                                                                                                   | [M+H] <sup>+</sup> | 370.17001 | [C22H28N04] <sup>+</sup> | Aporphines                                       | WKHHFWJ1JRCXHA-INTZCTEOSANA-N | O(C1C=4C=2C=3C(OC)=C(OC)C=C4C3C(C2=CC1OC)[N+](C)(C)CC4)C                                   |
| 1309 | 3.901 | 215.05664 | Pesticide3 Monolinuron C9H11ClN2O2 Urea, N'-(4-chlorophenyl)-N-methoxy-N-methyl-                                                    | [M+H] <sup>+</sup> | 215.058   | C9H11ClN202              | N-phenylureas                                    | LKJPSUCKSLORMF-UHFFFAOYSA-N   | O=C(NC1=CC(=C(C)C)C1)N(OC)C                                                                |
| 1310 | 3.901 | 265.09973 | Peucedanol                                                                                                                          | [M+H] <sup>+</sup> | 265.10001 | C14H1605                 | 7-hydroxycoumarins                               | WRTWKAQFZYXAEJ-GPCCEGCSANA-N  | O=C1OC=2C=C(O)C(=CC2C=C1)CC(O)C(O)C                                                        |
| 1311 | 3.909 | 256.11725 | 3,4,5-trimethoxycinnamic acid                                                                                                       | [M+H] <sup>+</sup> | 256.11795 | C12H1405                 | Coumaric acids and derivatives                   | YTFVRYKNXDABI-SNAWJOMRSANA-N  | O=C(O)C=CC1=CC(OC)=C(OC)C(OC)=C1                                                           |
| 1312 | 3.909 | 389.21622 | icaraside B5                                                                                                                        | [M+H] <sup>+</sup> | 389.216   | C19H3208                 | Fatty acyl glycosides of mono- and disaccharides | YTFVRYKNXDABI-SNAWJOMRSANA-N  | O=C1C=C(C)C(O)C(CCC(OC2OC(C)C(O)C(C)2)C(C)C(C)C(C)C(C)C1                                   |
| 1313 | 3.913 | 290.14923 | Antibiotic TAN 1169B                                                                                                                | [M+H] <sup>+</sup> | 290.14999 | C15H19N303               | Pyroloindoles                                    | OXGGVEYZLRHHP-UHFFFAOYNA-N    | O=C(OC1=CC=C2NC3N(C(=O)C)CC3(C2=C1)C)NC                                                    |
| 1314 | 3.917 | 287.07208 | licochalcone B                                                                                                                      | [M+H] <sup>+</sup> | 287.07257 | C16H1405                 | Retrochalcones                                   | DRDRYGIIYOPBZ-XBXARRHUSA-N    | O=C(C=CC1=CC=C(O)C(O)=C1OC)C2=CC=C(O)C=C2                                                  |
| 1315 | 3.918 | 374.14645 | Gatifloxacin                                                                                                                        | [M-H] <sup>-</sup> | 374.14301 | C19H22FN304              | Quinoline carboxylic acids                       | XUBOMFCQDBHKN-UHFFFAOYSA-N    | O=C(O)C1=CN(C2=C(OC)C(=C(F)C=C2C1O)N3CCNC(C)3)C4CC4                                        |
| 1316 | 3.924 | 359.22754 | (Z)-5-[(1S,2R,4aR,8aR)-5-(hydroxymethyl)-1,2,4a-trimethyl-2,3,4,7,8,8a-hexahydronaphthalen-1-yl]-3-(hydroxymethyl)pent-2-enoic acid | [M+H] <sup>+</sup> | 359.22626 | C20H3204                 | Colensane and clerodane diterpenoids             | LRLROPPFPABQRF-CBYQQG1ISA-N   | O=C(O)C=C(C)O)CCC1(C)C(C)CCC2(C(=CCCC21)CO)C                                               |
| 1317 | 3.939 | 314.2077  | (2E,4E)-N-[2-(4-hydroxyphenyl)ethyl]dodeca-2,4-dienamide                                                                            | [M-H] <sup>-</sup> | 314.21255 | C20H29N02                | 1-hydroxy-2-unsubstituted benzeneoids            | VVRNVAJXAUQHEN-BNFZFUHLSANA-N | OC(=NCCC1=CC=C(C)C=C1)C=CC=CCCCCCC                                                         |
| 1318 | 3.94  | 179.03389 | trans-Caffeic acid                                                                                                                  | [M-H] <sup>-</sup> | 179.03497 | C9H804                   | Caffeic acid and derivatives                     | QAIPRVGONGVQAS-UHFFFAOYSA-N   | O=C(O)C=CC1=CC=C(O)C(O)=C1                                                                 |
| 1319 | 3.943 | 244.15416 | Pinacidil                                                                                                                           | [M-H] <sup>-</sup> | 244.15677 | C13H19N5                 | Pyridines and derivatives                        | IVNVZDGDKPTYHK-UHFFFAOYNA-N   | N#CN=C(N=C1C=CNC=C1)NC(C)C(C)C                                                             |
| 1320 | 3.944 | 231.16985 | Isoleucylvaline                                                                                                                     | [M+H] <sup>+</sup> | 231.1707  | C11H22N203               | Dipeptides                                       | BXBI0NYJCSDF-UHFFFAOYNA-N     | O=C(O)C(NC(=O)C(N)C(C)CC)C(C)C                                                             |
| 1321 | 3.95  | 323.19946 | 16-Heptadecyne-1,2,4-triol                                                                                                          | [M+H] <sup>+</sup> | 323.1983  | C17H3203                 | Long-chain fatty alcohols                        | OHLQBKXSJYBMK-UHFFFAOYSA-N    | C#CCCCCCCCCCCC(O)CC(O)CO                                                                   |
| 1322 | 3.95  | 292.20428 | Terbinafine                                                                                                                         | [M+H] <sup>+</sup> | 292.20596 | C21H25N                  | Naphthalenes                                     | DOMXUEMWDABQBU-UHFFFAOYSA-N   | CC(C)C(C)C#CC=CCN(C)CC1=CC=CC2=CC=CC=C2C1                                                  |
| 1323 | 3.951 | 241.14296 | Imiquimod                                                                                                                           | [M+H] <sup>+</sup> | 241.145   | C14H16N4                 | Imidazoquinolines                                | DOUYETYNHVLEO-UHFFFAOYSA-N    | N1=CN(C2=C1C(=NC=3C=CC(=CC32)N)CC(C)C                                                      |
| 1324 | 3.952 | 270.16925 | (8aR,12S,12aR)-12-hydroxy-4-methyl-4,5,6,7,8,8a,12,12a-octahydro-1H-3-benzoxecine-2,9-dione                                         | [M+H] <sup>+</sup> | 270.16998 | C14H2004                 | Oxocins                                          | WTQWON1IPGERSZ-ROAVRGLVSA-N   | O=C1OC(C)CCCCC2C(=O)C=CC(O)C2C1                                                            |
| 1325 | 3.965 | 151.07516 | 1-(4-methoxyphenyl)ethanone                                                                                                         | [M+H] <sup>+</sup> | 151.08    | C9H1002                  | Alkyl-phenylketones                              | NTPLXRHDUXRPN-UHFFFAOYSA-N    | O=C(C1=CC=C(OC)C=C1)C                                                                      |
| 1326 | 3.97  | 160.09651 | N-Isovalerylglycine                                                                                                                 | [M+H] <sup>+</sup> | 160.09682 | C7H13N03                 | N-acyl-alpha amino acids                         | ZRXKMKMBMNNQC-UHFFFAOYSA-N    | O=C(O)CN=C(O)CC(C)C                                                                        |
| 1327 | 3.971 | 187.09625 | 2-(1-hydroxyethyl)-4-(2-hydroxypropyl)-2H-furan-5-one                                                                               | [M+H] <sup>+</sup> | 187.09648 | C9H1404                  | Butenolides                                      | JAAFNWYGLROOGI-UHFFFAOYSA-N   | O=C1OC(C=C1CC(O)C)C(O)C                                                                    |
| 1328 | 3.976 | 321.15485 | 8:1+20 fatty acyl hexoside                                                                                                          | [M-H] <sup>-</sup> | 321.1546  | C14H2608                 | Fatty acyl hexosides                             | YUPLCLHITUNDMAN-UHFFFAOYNA-N  | O=C(OC(C)CC(OC1OC(CO)C(O)C(C1)O)C)C                                                        |
| 1329 | 3.978 | 271.13528 | alpinetin                                                                                                                           | [M+H] <sup>+</sup> | 271.1337  | C16H1404                 | 5-O-methylated flavonoids                        | QQQCWDPMPFUG-UHFFFAOYSA-N     | O=C1C=2C(OC)=CC(O)=CC2OC(2C=CC=CC3)C1                                                      |
| 1330 | 3.98  | 625.15057 | 3-O-beta-(6''-trans-caffeoyl)-galactopyranosyl quercetin                                                                            | [M-H] <sup>-</sup> | 625.14801 | C30H26015                | Flavonoid 3-O-p-coumaroyl glycosides             | IHBVMUCQZEAPE-YBDSQCSQSA-N    | O=C(OC1OC(OC=2C(=O)C=3C(O)=CC(O)=CC3OC2=4C=CC(O)=C(O)C4)C(C)C(C)O)C1)C=CC=C(C(OC)C(C)C)=C5 |
| 1331 | 3.981 | 427.18152 | [8,8-dimethyl-10-(3-methylbut-2-enyloxy)-2-oxo-9,10-dihydropyrano[2,3-f]chromen-9-yl] 3-methylbutanoate                             | [M-H] <sup>-</sup> | 427.17621 | C24H2807                 | Angular pyranocoumarins                          | MYXNO11PWBFPR-UHFFFAOYSA-N    | O=C1OC2=C(C=C1)C=CC=3OC(C)C(C)C(OC(=O)CC(C)C)C(OC(=O)C=C(C)C)C32                           |

|      |       |           |                                                                                                                                                       |                    |           |            |                                          |                             |                                                                                |
|------|-------|-----------|-------------------------------------------------------------------------------------------------------------------------------------------------------|--------------------|-----------|------------|------------------------------------------|-----------------------------|--------------------------------------------------------------------------------|
| 1332 | 3.982 | 257.17389 | ((6aR,9R,10aR)-7-methyl-4,6,6a,7,8,9,10,10a-octahydroindolo[4,3-f <sub>2</sub> ]indolin-9-yl)methanol                                                 | [M+H] <sup>+</sup> | 257.17001 | C16H20N2O  | Clavines and derivatives                 | UFKTX1XVYGAES-WDBKCZKBSA-N  | 0CC1CN(C)C2CC3-NC4-CC-CC(=C43)C2C1                                             |
| 1333 | 3.986 | 245.1019  | Indole-3-acetyl-L-alanine                                                                                                                             | [M-H] <sup>-</sup> | 245.09317 | C13H14N2O3 | N-acyl-L-alpha-amino acids               | FBDCJLXTUCMLF-UHFFFAOYNA-N  | CC(N=C(O)C1=CN=C2-CC-OC(=C12)C(O)=O                                            |
| 1334 | 3.987 | 338.12286 | barceloneic acid A                                                                                                                                    | [M+H] <sup>+</sup> | 338.12341 | C16H16O7   | Diphenylethers                           | ULPVI8VORQAXJB-UHFFFAOYSA-N | O=C(O)C1=C(O)C=C(C=C1OC2=C(O)C=C(OC)C=C2OC)C                                   |
| 1335 | 3.989 | 328.23236 | UR-144 N(4-hydroxypentyl)                                                                                                                             | [M+H] <sup>+</sup> | 328.22699 | C21H29NO2  | N-alkylindoles                           | YHFRYHZNLEAAP-UHFFFAOYSA-N  | O=C(C1=CN(C=2C-CC-CC12)CCCC(O)C)C3C(C)(C)C3(C)C                                |
| 1336 | 3.99  | 190.05022 | (2-oxo-2,3-dihydro-1H-indol-3-yl)acetic acid                                                                                                          | [M-H] <sup>-</sup> | 190.05096 | C10H9NO3   | Indolyl carboxylic acids and derivatives | ILGMGHZPRDCCS-UHFFFAOYNA-N  | O=C(O)CC1C(O)=NC=2C-CC-CC21                                                    |
| 1337 | 3.994 | 247.08559 | (3Z)-3-butylidene-6,7-dihydroxy-4,5,6,7-tetrahydro-2-benzofuran-1-one                                                                                 | [M+H] <sup>+</sup> | 247.09    | C12H16O4   | Isobenzofurans                           | DQNCMIQSXNGHOA-WTKPLQERSA-N | O=C1OC(=CCCC)C2=C1(C)(O)CC2                                                    |
| 1338 | 4.001 | 408.19009 | 3-(2-((7H-purin-6-yl)amino)ethyl)-2-methyl-4-oxo-3,4,5,6-tetrahydro-2H-2,6-methanobenzo[ <i>c</i> ]1,3loxazocine-5-carboxamide                        | [M+H] <sup>+</sup> | 408.19    | C20H21N7O3 | 6-alkylaminopurines                      | MMJORIFFCDBAA-UHFFFAOYSA-N  | O=C(N)C1C(=O)N(CCNC2=NC=NC=3C=NC32)C4(OC=5C=CC-CC5C1C41C                       |
| 1339 | 4.001 | 390.14249 | Taldalafil                                                                                                                                            | [M+H] <sup>+</sup> | 390.14484 | C22H19N3O4 | Beta carbolines                          | WOXKDGUGVFFRN-UHFFFAOYNA-N  | O=C1N2C(C3=CC=C4OC(C4=C3)C=5NC=6C-CC-CC65CC2C(=O)N(C)C1                        |
| 1340 | 4.002 | 251.17474 | Rivastigmine tartrate (Exelon)                                                                                                                        | [M+H] <sup>+</sup> | 251.175   | C18H28N2O8 | Phenoxy compounds                        | GWGHUAUXRMOT-MBANBLQSA-N    | O=C(O)C(O)C(O)C(=O)O, O=C(OC1=CC-CC(=C1)C(N(C)C)C(N)C)C                        |
| 1341 | 4.004 | 313.11664 | 2-(3,4-dimethoxyphenyl)-7-methoxy-4H-chromen-4-one                                                                                                    | [M+H] <sup>+</sup> | 313.10999 | C18H16O5   | 7-O-methylated flavonoids                | VSEFYCZPDWYSYS-UHFFFAOYSA-N | O=C1C=C(OC2=CC(OC)=CC(=C12)C=3C=CC(OC)=C(C)OC3                                 |
| 1342 | 4.009 | 434.22311 | Valsartan                                                                                                                                             | [M-H] <sup>-</sup> | 434.21976 | C24H29N5O3 | Valine and derivatives                   | ACWBPQMZXGDQFX-UHFFFAOYNA-N | CCCCC(N(C(=C(C=C(C1)C2=CC-CC=C2C3=NNN=N3)C(C)C(C)C(=O)O)=O                     |
| 1343 | 4.01  | 309.08609 | Gastrodin                                                                                                                                             | [M+H] <sup>+</sup> | 309.09    | C13H18O7   | Phenolic glycosides                      | PIQSUZTXKPLAPR-UJPOAAIJSAN  | 0CC1=CC=C(OC2OC(CO)C(O)C2O)C=C1                                                |
| 1344 | 4.01  | 386.2088  | Uncarine c                                                                                                                                            | [M+H] <sup>+</sup> | 386.20743 | C21H24N2O4 | Indolizidines                            | JMIAZDVHNCPPDM-UHFFFAOYSA-N | O=C(OC)C1=CC(C)C2CN3CCC4(C)=NC=5C-CC=C54)C3CC12                                |
| 1345 | 4.031 | 332.9382  | PFAP-diPAP                                                                                                                                            | [M-H] <sup>-</sup> | 332.93799 | C4HF10O4P  | PFSA                                     | HJLWRXZHQHRZCH-UHFFFAOYSA-N | O=P(O)(OC(F)(F)F)OC(F)(F)C(F)(F)F                                              |
| 1346 | 4.04  | 257.14899 | Isocurcumenol                                                                                                                                         | [M+H] <sup>+</sup> | 257.14999 | C15H22O2   | Guianes                                  | DEBDFZGNZTYMF-NZBPQADJSA-N  | OC12OC3(C=C1C(C)C(C)C(C)C2)CCC3C                                               |
| 1347 | 4.041 | 165.05421 | P-Coumaric acid                                                                                                                                       | [M+H] <sup>+</sup> | 165.05499 | C9H8O3     | Hydroxycinnamic acids                    | NGSWKAQJJWESNS-ZXXKWIFPSA-N | O=C(O)C=CC1=CC=C(O)C=C1                                                        |
| 1348 | 4.042 | 579.12897 | quercetin-3-O-deoxyhexosyl(1-2)pentoside                                                                                                              | [M-H] <sup>-</sup> | 579.13397 | C26H28O15  | Flavonoid-3-O-glycosides                 | WRLBR1WXGBKHQ-UHFFFAOYSA-N  | O=C1C(OC2OC(C)C(O)C2OC3OC(C)C(O)C3O)=C(OC=4C=C(O)C=C(C)C14)=5C=C(C)C(=O)C5     |
| 1349 | 4.043 | 474.27902 | Chasmanine                                                                                                                                            | [M+H] <sup>+</sup> | 474.28    | C25H41N06  | Aconitane-type diterpenoid alkaloids     | DBODJJZKZFBZD-XXYVQWTJSA-N  | OC1C2C3CC1C(O)(CC2OC)C4C(OC)C5C6(OC)CN(OC)4C35C(OC)C6                          |
| 1350 | 4.045 | 506.30612 | 2-(((4R)-4-((3R,5S,7R,8R,9S,12S,14S,17R)-3,7,12-trihydroxy-10,13-dimethylhexadecahydro-1H-cyclopenta[ <i>a</i> ]phenanthren-17-yl))pentanamido)acetic | [M+H] <sup>+</sup> | 506.31    | C26H45N07  | Glycinated bile acids and derivatives    | WDKPFRHOCMLKPR-SSBNMFHASA-N | O=C(O)CNC(=O)CCC(C)C1CC2C3C(O)CC4C(O)CC4(C)C3CC(O)C12C                         |
| 1351 | 4.049 | 152.01614 | 2-Hydroxybenzothiazole                                                                                                                                | [M+H] <sup>+</sup> | 152.01646 | C7H5N05    | Benzothiazoles                           | YEDIAINPPJYDJZ-UHFFFAOYSA-N | C1=CC=C2C(=C1)N=C(O)S2                                                         |
| 1352 | 4.061 | 239.12686 | 7-Hydroxyflavone                                                                                                                                      | [M+H] <sup>+</sup> | 239.12721 | C15H10O3   | Flavones                                 | MQGPGSCMMJKNHQ-UHFFFAOYSA-N | O=C1C=C(OC2=CC(O)=CC=C12)C=3C=CC=C3                                            |
| 1353 | 4.073 | 613.17047 | Safflomin A                                                                                                                                           | [M+H] <sup>+</sup> | 613.16998 | C27H32O16  | C-glycosyl compounds                     | IABVBSVCVHLRGE-UXEKTNMQSA-N | O=C1C(=C(O)C=CC2=CC(C)(C=C2)C(O)=C(C(=O)C1)C3OC(CO)C(O)C(O)C3O)C4OC(CO)C(O)C4O |
| 1354 | 4.08  | 373.11234 | (2S,3S,4S,5R,6R)-6-(3-benzoyloxy-2-hydroxypropoxy)-3,4,5-trihydroxyoxane-2-carboxylic acid                                                            | [M+H] <sup>+</sup> | 373.11292 | C16H20O10  | 0-glucuronides                           | DLZMKPZOEYXKHQ-MQCRQNCBSA-N | O=C(O)C1OC(OC(C)COC(=O)C=2C=CC=CC2)C(O)C(O)C1O                                 |
| 1355 | 4.08  | 395.09357 | [(E)-3-acetyloxy-7-hydroxy-7-(6-oxo-2,3-dihydropyran-2-yl)hept-4-en-2-yl] acetate                                                                     | [M+H] <sup>+</sup> | 395.09351 | C17H24O8   | Tricarboxylic acids and derivatives      | STNNWPKHREBGMQ-CHDGQBGSA-N  | O=C1OC(C=C1)C(O)C(OC)C=CC(OC(=O)C)C(OC(=O)C)C                                  |

|      |        |            |                                                                                                                                          |                      |            |              |                                                 |                              |                                                                                           |
|------|--------|------------|------------------------------------------------------------------------------------------------------------------------------------------|----------------------|------------|--------------|-------------------------------------------------|------------------------------|-------------------------------------------------------------------------------------------|
| 1375 | 4. 184 | 625. 17059 | Isorhamnetin 3-O-neohesperoside                                                                                                          | [M+H] <sup>+</sup>   | 625. 16998 | C28H32O16    | Flavonoid-3-O-glycosides                        | QHLKSZBF1JJREC-SPSUIZEHSA-N  | O=C1C(OC2OC(CO)C(O)C(CO)C2OC3OC(C)C(O)C(CO)C3O)=C(OC=C=C(O)C=C(O)C14)C=C5C=CC(O)=C(OC)C5  |
| 1376 | 4. 191 | 180. 10138 | N-acetyltyramine                                                                                                                         | [M+H] <sup>+</sup>   | 180. 1019  | C10H13NO2    | 1-hydroxy-2-<br>unsubstituted benzenoids        | ATDWJOOPFDQZNK-UHFFFAOYSA-N  | OC1=CC=C(C=C1)CCN=C(O)C                                                                   |
| 1377 | 4. 196 | 171. 13741 | gamma-Decalactone                                                                                                                        | [M+H] <sup>+</sup>   | 171. 13795 | C10H18O2     | Gamma butyrolactones                            | IFYYFLINQYPWGJ-UHFFFAOYNA-N  | CCCCCCC1CCC(=O)O1                                                                         |
| 1378 | 4. 201 | 333. 10757 | Isopongaflavone                                                                                                                          | [M+H] <sup>-</sup>   | 333. 11322 | C21H18O4     | Pyranoflavonoids                                | DPAGRPSAFDXQDN-UHFFFAOYSA-N  | O=C1C=C(OC2=C3C=CC(OC3=CC(OC)=C12)(C)C)C=C4C=CC=CC4                                       |
| 1379 | 4. 211 | 327. 20206 | hydroquinidine                                                                                                                           | [M+H] <sup>+</sup>   | 327. 20001 | C20H26N2O2   | Cinchona alkaloids                              | LJQQZACKSYWCH-NIHZBZNOSA-N   | OC(C=1C=CN=C2C=CC(OC)=CC21)C3M4CC(C3)C(C4)CC                                              |
| 1380 | 4. 214 | 434. 20047 | (2R,3S,4S,5R,6R)-2-[[[(2S,3R,4R)-3,4-dihydroxy-4-(hydroxymethyl)oxolan-2-yl]oxymethyl]-6-(2-phenylethoxy)oxane-3,4,5-triol]              | [M+NH4] <sup>+</sup> | 434. 20206 | C19H28O10    | 0-glycosyl compounds                            | GZSQKQFXMZDKPV-DERWZJFJSA-N  | OC(C1)COC(OC2COC(OCCC=3C=CC=C3)C(O)C(O)C2O)C1O                                            |
| 1381 | 4. 222 | 407. 14322 | Amlodipine                                                                                                                               | [M+H] <sup>-</sup>   | 407. 13791 | C20H25ClN2O5 | Dihydropyridinecarboxylic acids and derivatives | HTIQEAQVCTYUB-UHFFFAOYNA-N   | O=C(OC)C1=C(NC(C=C1)C(=O)OCC)C1C=C2CC=CC2C1)COCN)C                                        |
| 1382 | 4. 229 | 327. 08633 | 5-hydroxy-3,7-dimethoxy-2-(4-methoxyphenyl)-4H-chromen-4-one                                                                             | [M+H] <sup>-</sup>   | 327. 086   | C18H16O6     | 7-O-methylated flavonoids                       | WSQWAMGRHLQANC-UHFFFAOYSA-N  | O=C1C(OC)=C(OC=C2C(OC)C=C(O)C12)C=C3CC(OC)=CC3                                            |
| 1383 | 4. 233 | 153. 05418 | Vanillin                                                                                                                                 | [M+H] <sup>+</sup>   | 153. 05463 | C8H8O3       | Methoxyphenols                                  | MWOOGOJBH1ARPG-UHFFFAOYSA-N  | O=CC1=CC=C(O)C(OC)=C1                                                                     |
| 1384 | 4. 234 | 381. 1911  | Histamine-trifluoromethyltoluide                                                                                                         | [M+H] <sup>-</sup>   | 381. 19077 | C19H25F3N4O  | Trifluoromethylbenzenes                         | PMKJGBBYNEYP-UHFFFAOYNA-N    | O=C(NC1=CC=C(C=C1)C(F)(F)F)C(CCC(NC2C=CN=CN2)C                                            |
| 1385 | 4. 236 | 182. 08073 | Tyrosine                                                                                                                                 | [M+H] <sup>+</sup>   | 182. 08099 | C9H11NO3     | Tyrosine and derivatives                        | OUYCCASQSFEME-UHFFFAOYSA-N   | O=C(O)C(N)CC1=CC=C(O)C=C1                                                                 |
| 1386 | 4. 253 | 433. 1106  | Vitexin                                                                                                                                  | [M+H] <sup>+</sup>   | 433. 11292 | C21H20O10    | Flavonoid 8-C-glycosides                        | SGEWCQFVRRZDC-YPRICQMDSA-N   | OC[C-H]1O[C-H]1([C-H](O)[C-H](O)[C-H]1O)C1=C(O)C=C(O)C2=C1OC(=CC2=O)C1=CC=C(O)C=C1        |
| 1387 | 4. 255 | 320. 2059  | Tributyrin                                                                                                                               | [M+H] <sup>+</sup>   | 320. 207   | C15H26O6     | Triacylglycerols                                | UYXTWCETRIEDR-UHFFFAOYSA-N   | O=C(OC)C(OC(=O)CCC)COC(=O)CCC                                                             |
| 1388 | 4. 258 | 211. 14357 | Cyclo(Leu-Pro)                                                                                                                           | [M+H] <sup>+</sup>   | 211. 1441  | C11H18N2O2   | Alpha amino acids and derivatives               | SZJNCZMRZAUNQT-UHFFFAOYNA-N  | O=C1N2CCCC2C(O)=NC1CC(C)C                                                                 |
| 1389 | 4. 259 | 189. 07564 | Hydroxysuberic acid                                                                                                                      | [M+H] <sup>-</sup>   | 189. 0766  | C8H14O5      | Organic acids                                   | ARJZZFXSNJKGR-UHFFFAOYNA-N   | O=C(O)CCCC(O)CC(=O)O                                                                      |
| 1390 | 4. 261 | 357. 09692 | 5-Hydroxy-2',4',7,8-Tetramethoxyflavone                                                                                                  | [M+H] <sup>-</sup>   | 357. 09796 | C19H18O7     | 8-O-methylated flavonoids                       | AHUAGKIYEMQITH-UHFFFAOYSA-N  | O=C1C=C(OC2=C(OC)C(OC)=CC(O)=C12)C=C3CC(OC)=CC3OC                                         |
| 1391 | 4. 264 | 380. 94601 | PFSA-H                                                                                                                                   | [M+H] <sup>-</sup>   | 380. 94601 | C6H2F12O3S   | PFSA                                            | DOWJLTPWFGXFD-UHFFFAOYSA-N   | O=S(=O)(O)C(F)(F)C(F)(F)C(F)(F)C(F)(F)C(F)(F)C(F)(F)F                                     |
| 1392 | 4. 265 | 369. 09677 | Acacetin Diacetate                                                                                                                       | [M+H] <sup>+</sup>   | 369. 09686 | C20H16O7     | 4'-O-methylated flavonoids                      | VYHHSBHXZYSILO-UHFFFAOYSA-N  | O=C(OC=C1C=C(OC(=O)C)C=C2(C(=O)C2C1)C=C3CC(OC)=CC3)C                                      |
| 1393 | 4. 266 | 347. 11563 | Toraseamide                                                                                                                              | [M+H] <sup>-</sup>   | 347. 11835 | C16H20N4O3S  | Pyridinesulfonamides                            | NGBFQHCQMULJNZ-UHFFFAOYSA-N  | CC(C)N=C(NS(C1=CN=C=CC1=NC2=CC=CC(C)=C2)(=O)=O)=O                                         |
| 1394 | 4. 276 | 179. 15379 | 6,7-Dihydroxycoumarin;esculetin                                                                                                          | [M+H] <sup>+</sup>   | 179. 14999 | C9H6O4       | 6,7-dihydroxycoumarins                          | ILEDWLMCKZNDJK-UHFFFAOYSA-N  | O=C1OC=2C=C(O)C(O)=CC2=C1                                                                 |
| 1395 | 4. 282 | 510. 25674 | [3,4,5-trihydroxy-6-[[[3,4,5-trihydroxy-6-(hydroxymethyl)oxan-2-yl]oxymethyl]oxan-2-yl]-2,6,6-trimethylcyclohexene-1-carboxylate         | [M+H] <sup>+</sup>   | 510. 25449 | C22H36O12    | 0-glycosyl compounds                            | URTXFXGQVQACIC-UHFFFAOYSA-N  | O=C(OC1OC(COC2OC(CO)C(O)C(CO)C2O)C(O)C1O)C3OC(C)CCC(C3)C                                  |
| 1396 | 4. 288 | 253. 10754 | Phomalone                                                                                                                                | [M+H] <sup>-</sup>   | 253. 10814 | C13H18O5     | Alkyl-phenylketones                             | PTDQWUHUOMDVS-UHFFFAOYSA-N   | O=C(C1=C(O)C(=C(C(=O)C=C1OC)CCO)CCC                                                       |
| 1397 | 4. 288 | 496. 24182 | Silodosin (Rapaflo)                                                                                                                      | [M+H] <sup>+</sup>   | 496. 242   | C25H32F3N3O4 | Indolecarboxamides and derivatives              | CNCPYILMDWPEY-QGZVFWFLSA-N   | O=C(N)C1=CC(=CC2=C1N(CCC2)CCO)CC(NCOC=3C=CC=3OCC(F)(F)F)C                                 |
| 1398 | 4. 289 | 470. 29544 | (E)-5-hydroxy-N-[3-[5-[3-[(E)-5-hydroxy-3-methylpent-2-enoyl]aminol]propyl]-3,6-dioxopiperazin-2-yl]propyl]-3-methylpent-2-enamide       | [M+H] <sup>+</sup>   | 470. 2973  | C22H36N4O6   | Alpha amino acids and derivatives               | CNQCBOHTKBVCFM-WXUJJIITCSA-N | OC(=NCCC1N=C(O)(N=C1O)CCCN=C(O)C(C)C(CO)C=C(C)CCO                                         |
| 1399 | 4. 299 | 508. 27811 | Epothilone B                                                                                                                             | [M+H] <sup>+</sup>   | 508. 27301 | C27H41NO6S   | Epothilones and analogues                       | QXRSDHAAWVKZLJ-FBAHCSNKS-N   | O=C1OC(C(=CC=2N(C(SC2)C)CC3OC(C)CCCC(C)C(C(=O)C(C(=O)C1)C                                 |
| 1400 | 4. 303 | 203. 04448 | THYMOQUINONE                                                                                                                             | [M+H] <sup>+</sup>   | 203. 04689 | C10H12O2     | P-benzoquinones                                 | KEQHJBSNCLWCAE-UHFFFAOYSA-N  | O=C1C=C(C(=O)C=C1)C(C)C                                                                   |
| 1401 | 4. 304 | 343. 12796 | 2,6-dihydroxy-7-methoxy-1,1,4a-trimethyl-3,4,10,10a-tetrahydro-2H-phenanthren-9-one                                                      | [M+H] <sup>+</sup>   | 343. 13062 | C18H24O4     | Diterpenoids                                    | JKTSLDANJEZMK-UHFFFAOYSA-N   | O=C1C2=CC(OC)=C(O)C=C2C3(C)CCC(O)C(C)C(C3)C1                                              |
| 1402 | 4. 306 | 538. 27393 | taurohyocholic acid                                                                                                                      | [M+H] <sup>+</sup>   | 538. 28003 | C26H45NO7S   | Trihydroxy bile acids, alcohols and derivatives | XSOLDPYUICRHJX-DSNLCWFJSA-N  | O=S(=O)(O)CCN=C(O)CCC(C)C1CCC2C3C(O)C(O)C4CC(O)CCC4(C)C3CCC12C                            |
| 1403 | 4. 307 | 409. 11041 | (1s)-1,5-anhydro-1-[2,4,6-trihydroxy-3-(4-hydroxybenzoyl)phenyl]-d-glucitol                                                              | [M+H] <sup>+</sup>   | 409. 11292 | C19H20O10    | Phenolic glycosides                             | BZYKNVLTWVYEFA-ZJJKXBQSA-N   | O=C(C1=CC=C(C=C1)C2=C(O)C=C(O)C(=C2O)C3OC(CO)C(O)C(O)C3O                                  |
| 1404 | 4. 311 | 269. 03339 | kavain                                                                                                                                   | [M+H] <sup>+</sup>   | 269. 02936 | C14H14O3     | Kavalactones                                    | XEAQIWGXBCYFX-GUOLPTJISA-N   | O=C1OC(C=CC=2C=CC=CC2)CC(OC)=C1                                                           |
| 1405 | 4. 311 | 329. 21667 | Peramivir Trihydrate                                                                                                                     | [M+H] <sup>+</sup>   | 329. 21799 | C15H34N4O7   | Gamma amino acids and derivatives               | RFUCJKFZFXN1GB-ZBHRWQZSA-N   | O=C(O)C1CC(NC(=N)N)C(C1O)C(NC(=O)C)C(C)CC.O.O.O                                           |
| 1406 | 4. 312 | 607. 16565 | Flavonol base + 3O, 1MeO, 0-diflex-diflex                                                                                                | [M+H] <sup>-</sup>   | 607. 16571 | C28H32O15    | Flavonol 0-glycosides                           | DGFGSUQDQJHFL-UHFFFAOYNA-N   | O=C3C(OC2OC(C)C(OC1OC(C)C(O)C(O)C1(O)C(C2)O))=C(OC4(C(C(OC)CC(O)C4O)C4O)=C5C=CC(CO)C=C5)C |
| 1407 | 4. 314 | 543. 23834 | Symplocosin                                                                                                                              | [M+H] <sup>+</sup>   | 543. 23749 | C26H32O11    | Lignan glycosides                               | QLJNETOQQXTLI-UHFFFAOYSA-N   | OC1=CC=C(C=C1OC)C2OC3C(OC23)C4=CC=C(C(OC5O)C(O)C(O)C5O)C(OC)=C4                           |
| 1408 | 4. 322 | 116. 07043 | L-(-)-Proline                                                                                                                            | [M+H] <sup>+</sup>   | 116. 0706  | C5H9NO2      | Proline and derivatives                         | ONIBWKKTOPOVIA-BYPYZUCNSA-N  | OC(=O)[C@H]1CCCN1                                                                         |
| 1409 | 4. 331 | 284. 14798 | Metolachlor                                                                                                                              | [M+H] <sup>+</sup>   | 284. 14117 | C15H22ClN2O2 | Anilides                                        | WYQBLGZPHOPPO-UHFFFAOYNA-N   | CCC1=CC=CC(C)=C1N(C(C)OCC)C(=O)CC1                                                        |
| 1410 | 4. 333 | 385. 11234 | Sinapoylhexoside (isomer of 955)                                                                                                         | [M+H] <sup>-</sup>   | 385. 1131  | C17H22O10    | Sinapinic acid and derivatives                  | XRXBRPFTFKHEF-UHFFFAOYNA-N   | O=C(OC1OC(CO)C(O)C(O)C1O)C(=O)C=CC=2C=C(OC)C(O)=C(OC)C=2                                  |
| 1411 | 4. 336 | 341. 13715 | Flavanone base + 3O, 1Prenyl                                                                                                             | [M+H] <sup>+</sup>   | 341. 13721 | C20H20O5     | Prenylated flavanones                           | LPEFZZAVJPLNZ-UHFFFAOYNA-N   | O=C2C=C(O)C=CC(O)=C(C=3(OC(C1=CC=C(O)C=C1)C2)CC=C(C)C(C                                   |
| 1412 | 4. 337 | 405. 15057 | Desoxyrhaponticin                                                                                                                        | [M+H] <sup>+</sup>   | 405. 14999 | C21H24O8     | Stilbene glycosides                             | MFMQRDLLSRLLJY-DXKBKAGUSA-N  | OC=1C=C(OC2OC(CO)C(O)C(C2O)C=C(C=CC3=CC=C(OC)C=C3)C1                                      |
| 1413 | 4. 339 | 149. 0959  | ANETHOLE                                                                                                                                 | [M+H] <sup>+</sup>   | 149. 09608 | C10H12O      | Anisoles                                        | RUV1NXPYWBROJD-ARJAWSKDSA-N  | O(C1=CC=C(C=C1)C=CC)C                                                                     |
| 1414 | 4. 354 | 309. 09512 | D-(-)-salicin                                                                                                                            | [M+H] <sup>+</sup>   | 309. 09448 | C13H18O7     | Phenolic glycosides                             | NGFM1CBJZRJ1BI-UHFFFAOYSA-N  | OC=C1C=CC=CC1OC2OC(CO)C(O)C2O                                                             |
| 1415 | 4. 355 | 560. 15576 | (2S)-6-[(2S)-5,7-dihydroxy-2-(4-hydroxyphenyl)-4-oxo-2,3-dihydrochromen-8-yl]-5,7-dihydroxy-2-(4-hydroxyphenyl)-2,3-dihydrochromen-4-one | [M+H] <sup>+</sup>   | 560. 15509 | C30H22O10    | Biflavonoids and nolyflavonoids                 | YBD1ZQWDBOOFB-GOTSBHOMSA-N   | O=C1C=2C(O)=CC(O)C(C2OC(C3=CC=C(O)C=C3)C1)C=4C(O)=CC=5OC(C6=CC=C(O)C=C6)CC(=O)C5C4O       |
| 1416 | 4. 356 | 227. 01837 | Trinitrotoluene                                                                                                                          | [M+H] <sup>-</sup>   | 227. 01839 | C7H5N3O6     | Nitrobenzenes                                   | SPSSLHKKWKEEL-UHFFFAOYSA-N   | CC1=C(C=C(C=C1N(=O)=O)N(=O)=O)N(=O)=O                                                     |
| 1417 | 4. 364 | 237. 03891 | SINAPIC ACID METHYL ETHER                                                                                                                | [M+H] <sup>-</sup>   | 237. 04083 | C12H14O5     | Coumaric acids and derivatives                  | YTFVRYKXDAIBI-SNAWJCMRSA-N   | O=C(O)C=CC1=CC(OC)=C(OC)C(OC)=C1                                                          |

|      |        |            |                                                                                                                                    |                    |            |             |                                                  |                             |                                                                                        |
|------|--------|------------|------------------------------------------------------------------------------------------------------------------------------------|--------------------|------------|-------------|--------------------------------------------------|-----------------------------|----------------------------------------------------------------------------------------|
| 1418 | 4. 37  | 154. 15851 | d-LIMONENE                                                                                                                         | [M+H] <sup>+</sup> | 154. 15901 | C10H16      | Menthane monoterpenoids                          | XMGQYMWDOXHJM-JTQLQTEISA-N  | C=C(C)C1CC=C(C)CC1                                                                     |
| 1419 | 4. 375 | 326. 13467 | Boldine                                                                                                                            | [M-H] <sup>-</sup> | 326. 13977 | C19H21N04   | Alkaloids                                        | LZJRNLRASBVRXR-UHFFFAOYNA-N | CC1=CC2=C(C(CCN(C)CCC4=CC(O)=C(O)C)C2=C34)C=C10                                        |
| 1420 | 4. 375 | 387. 19943 | Sinapoylhexoside                                                                                                                   | [M+H] <sup>+</sup> | 387. 20081 | C17H22010   | Sinapinic acid and derivatives                   | XRKBRPFTFKHEF-ONEGZZKNNA-N  | O=C(OC1OC(CO)C(O)C(C)C1O))C=CC=CC(C)C(C)=C(OC)C=C2                                     |
| 1421 | 4. 377 | 490. 31979 | Oxysporidinone_130003                                                                                                              | [M+H] <sup>+</sup> | 490. 31699 | C28H43N06   | Terpene glycosides                               | CYNJYDGSURTLL-CPNJWEJPSA-N  | O=C1C(=C(O)C(=CN1C)C2(O)CCC(=O)CC2O)C3OC(C(=CC(C)CC(C)C)C(C)C)C3                       |
| 1422 | 4. 388 | 647. 16846 | 4-(3-oxobutyl)phenyl 6-O-[(2E)-3-(4-hydroxyphenyl)prop-2-enoyl]-2-O-(3,4,5-trihydroxybenzoyl)-beta-D-glucopyranoside               | [M+H] <sup>+</sup> | 647. 16998 | C32H32013   | Phenolic glycosides                              | Q1EOAENKXYTH-IQDFXJLSA-N    | O=C(OC1OC(OC2=C(C(=C2)CCC(=O)C)C(OC(=O)C3=CC(O)=C(CO)C(O)=C3)(CO)C1O)C=C4C=CC=C(O)C=C4 |
| 1423 | 4. 39  | 314. 11316 | 5-[(E)-3-hydroxybut-1-enyl]-4-[4-[(E)-3-oxobut-1-enyl]anilino]oxolan-2-one                                                         | [M-H] <sup>-</sup> | 314. 11084 | C18H21N04   | Cinnamic acids and derivatives                   | HGCMCLAKARHJW-OBXOXFIQSA-N  | O=C1OC(C=CC(O)C)C(CN2=CC=C(C=CC(=O)C)C=C2)C1                                           |
| 1424 | 4. 392 | 413. 14447 | 3-oxo-3-[[[(2R,3S,4S,5R,6S)-3,4,5-trihydroxy-6-(4-hydroxy-5-methyl-2-propan-2-ylphenoxy)oxan-2-yl]methoxy]propanoic acid           | [M-H] <sup>-</sup> | 413. 14532 | C19H26010   | Terpene glycosides                               | VJVG7GQETNCOEX-LQDZTQBFSA-N | O=C(O)CC(=O)CC1OC(OC2=CC(=C(O)C=C2C(C)C)C(C)C(O)C(C)O)C1O                              |
| 1425 | 4. 395 | 304. 1167  | N-(6-methoxypyridin-3-yl)-1-methyl-1H-indole-6-carboxamide                                                                         | [M+H] <sup>+</sup> | 304. 10999 | C16H15N302  | Indolecarboxamides and derivatives               | IEYPTSQYHVVDAC-UHFFFAOYSA-N | O=C(NC1=CN=C(OC)C=C1)C=CC=CC=CC(C)C(C)C                                                |
| 1426 | 4. 395 | 454. 16919 | Phlorhizin                                                                                                                         | [M+H] <sup>+</sup> | 454. 17078 | C21H24010   | Flavonoid O-glycosides                           | IOUVKUPGOMBWBT-QNDFHXLGSA-N | O=C(C=C1C(O)=CC(O)=CC1OC2OC(CO)C(O)C(O)C2O)CCC3=CC=C(O)C=C3                            |
| 1427 | 4. 398 | 178. 01389 | S-CARBOXYMETHYL-L-CYSTEINE                                                                                                         | [M-H] <sup>-</sup> | 178. 017   | C5H9N04S    | L-cysteine-S-conjugates                          | GBFLZEXEOZUWRN-VKHMYEASA-N  | O=C(O)CSC(N)C(=O)O                                                                     |
| 1428 | 4. 399 | 250. 10684 | Goniothalenol                                                                                                                      | [M+H] <sup>+</sup> | 250. 10738 | C13H1204    | Furoprans                                        | ZK1RVBNLJG1EM-UHFFFAOYSA-N  | O=C1OC2C(OC(C=3C=CC=CC3)C2O)C=C1                                                       |
| 1429 | 4. 409 | 385. 21753 | (4aR)-5-hydroxy-6-methoxy-1,1-dimethyl-7-propan-2-yl-2,3,4,9,10,10a-hexahydrophenanthrene-4a-carboxylic acid                       | [M+H] <sup>+</sup> | 385. 21786 | C21H3004    | Diterpenoids                                     | QQNSARJGBPMQ1-MZVUKIXXSA-N  | O=C(O)C1C2=CC(O)=C(OC)C(C=CC3CC1C(C)C(C)CC2)C(C)C                                      |
| 1430 | 4. 415 | 347. 10925 | Demethyleneberberine                                                                                                               | [M+H] <sup>+</sup> | 347. 10999 | C19H18N04+  | Protoberberine alkaloids and derivatives         | HVTCCKMWZDWOY-UHFFFAOYSA-O  | OC=1C=CC2=CC=C4C=CC(OC)=C(OC)C4=C1N+3CCC2=CC1O                                         |
| 1431 | 4. 415 | 327. 11804 | Dendrophanol                                                                                                                       | [M+H] <sup>+</sup> | 327. 12    | C17H2005    | Stilbenes                                        | YTRAVU1KLRAOQ-UHFFFAOYSA-N  | OC1=CC=C(C=C1OC)CCC2=CC(OC)=C(O)C(C)C(=C2                                              |
| 1432 | 4. 417 | 288. 18002 | (4-oxido-2,3,5,6,7,8-hexahydro-1H-pyrrolizin-4-ium-1-yl)methyl 2,3-dihydroxy-3-methylpentanoate                                    | [M+H] <sup>+</sup> | 288. 18054 | C14H25N05   | Pyrrolizidines                                   | QRYNXLBAFAPSKQ-UHFFFAOYSA-N | O=C(OC1CCN2(=O)CCCC12)C(O)C(O)C(C)CC                                                   |
| 1433 | 4. 428 | 367. 18542 | Tobramycin 1-N- or 3-N-carbamoyl, ion source fragment                                                                              | [M+H] <sup>+</sup> | 367. 18301 | C14H30N407  | Aminocyclitol glycosides                         | IUFQFQNF1GWHJ-FZEEZGWEXSA-N | OC1OC(OC2C(O)C(OCN(C)C(C)C2N)C(O)C(C)N)C1O                                             |
| 1434 | 4. 434 | 267. 16922 | Panaxynol                                                                                                                          | [M+H] <sup>+</sup> | 267. 17001 | C17H240     | Long-chain fatty alcohols                        | UGJAEDFOKNAQD-ZHACJMWSA-N   | OC(C)CCCCC=CCCCCCCCC)C=C                                                               |
| 1435 | 4. 44  | 285. 15955 | Tropisetron                                                                                                                        | [M+H] <sup>+</sup> | 285. 15976 | C17H20N202  | Indolecarboxylic acids and derivatives           | ZNRGQMMCGHDTET-UHFFFAOYNA-N | O=C(OC1C2N(C)C(C)C2)C1C3=CC=C(C=CC=CC3                                                 |
| 1436 | 4. 445 | 273. 14383 | Sempervirine                                                                                                                       | [M+H] <sup>+</sup> | 273. 13861 | C19H16N2    | Beta carbolines                                  | UQVUEULZDJRMJR-UHFFFAOYSA-N | C1CCC2=CC3=C4N=C5C=CC=C5=C4C=CC3=C2C1                                                  |
| 1437 | 4. 448 | 271. 16354 | 19-Norandrosta-4,9-dien-3,17-dione                                                                                                 | [M+H] <sup>+</sup> | 271. 16299 | C18H2202    | Oxosteroids                                      | BHTWZQKERRCPZ-RYRKJORJSA-N  | O=C1C=C2C(=C3CCC4(C(=O)CC4C3CC2)C)CC1                                                  |
| 1438 | 4. 465 | 313. 13956 | 6-(1,1-DIMETHYLLALLYL)-2-(1-HYDROXY-1-METHYLETHYL)-2,3-DIHYDRO-7H-FURO[3,2-G]CHROMEN-7-ONE                                         | [M-H] <sup>-</sup> | 313. 14453 | C19H2204    | Psoralens                                        | JCDLLLYA1CSQV-INIZCTEOSA-N  | O=C1OC=CC=CC3C(C3=CC2=C1C(C=C)C(C)C(C)C)C1O                                            |
| 1439 | 4. 467 | 299. 13745 | 3-Hydroxy-3',4'-Dimethoxyflavone                                                                                                   | [M+H] <sup>+</sup> | 299. 13629 | C17H1405    | Flavonols                                        | BXLAVJWSFYZDPF-UHFFFAOYSA-N | O=C1C(O)C(=C(C=CC=CC21)C=3C=CC(OC)C(=O)C)C3                                            |
| 1440 | 4. 471 | 327. 1333  | 8,8-dimethyl-2-phenylpyrano[2,3-f]chromen-4-one                                                                                    | [M+H] <sup>+</sup> | 327. 13269 | C20H1603    | Pyranoflavonoids                                 | RBKXJAHRWPNPM-UHFFFAOYSA-N  | O=C1C=C(C=CC2C1=CC=C3OC(=CC32)C(C)C=4C=CC=CC4                                          |
| 1441 | 4. 484 | 305. 15897 | 1-(3aS,6Z,10Z,11aR)-6-(hydroxymethyl)-3-methylindene-2-oxo-3a,4,5,8,9,11a-hexahydrocyclohexa[h]furan-10-yl)methyl acetate          | [M-H] <sup>-</sup> | 305. 15668 | C17H2205    | Germacranolides and derivatives                  | XGODCDTVQAHYAH-DZPPMGJRSA-N | O=C1OC2C=C(COC(=O)C)CCC=C(CO)CCC2C1=C                                                  |
| 1442 | 4. 486 | 463. 12106 | (1S,3R,6R,7S,8S,9R,10S,13S,16S,17R)-8-tert-butyl-6,9,12,17-tetrahydroxy-16-methyl-2,4,14,19-                                       | [M+H] <sup>+</sup> | 463. 12106 | C20H24011   | Ginkgolides and bilobalides                      | AMOGMTLMADEGQ-PDZSGAKNSA-N  | O=C1OC2OC34C(=O)CC5C(O)C(C(C)C)C2(C1O)C54C(O)C6OC(=O)C(C)C63O                          |
| 1443 | 4. 486 | 325. 10226 | Licarin A                                                                                                                          | [M-H] <sup>-</sup> | 325. 10001 | C20H2204    | 2-arylbenzofuran flavonoids                      | ITDFOWJEDZPCF-AATRIKPKSA-N  | OC1=CC=C(C=C1OC)C2OC=3C(OC)=CC(C=CC)=CC3C2C                                            |
| 1444 | 4. 488 | 351. 1058  | 1-(4-hydroxyphenyl)-3-[(2R,3R,4S,5S,6R)-3,4,5-trihydroxy-6-(hydroxymethyl)oxan-2-yl]oxypropan-1-one                                | [M+H] <sup>+</sup> | 351. 10504 | C15H2008    | Fatty acyl glycosides of mono- and disaccharides | NPAQLFPPEOMKAL-VXXRCYHCSA-N | O=C(C1=CC=C(O)C=C1)CCOC2OC(CO)C(O)C(C)C2O                                              |
| 1445 | 4. 49  | 411. 18939 | Picaline                                                                                                                           | [M+H] <sup>+</sup> | 411. 19101 | C23H26N205  | Corynanthan-type alkaloids                       | DXTJMQCRVFNWBD-FTHUSJGSA-N  | O=C(OC(C1(=O)C(=O)C2C(=CC)CN34OC5(NC=6C=CC=C6C51C4)C3=C2)C                             |
| 1446 | 4. 494 | 165. 05476 | 3-Phenyllactic acid                                                                                                                | [M-H] <sup>-</sup> | 165. 05573 | C9H1003     | Phenylpropanoic acids                            | VOXXWSYKYCBWHO-UHFFFAOYNA-N | O=C(O)C(C)CC=1C=CC=CC1                                                                 |
| 1447 | 4. 528 | 281. 06595 | Feruloyl Lactate                                                                                                                   | [M-H] <sup>-</sup> | 281. 06479 | C13H1407    | Ferulic acid and derivatives                     | ZWAYKTOAUP1GML-HWKANZRONA-N | CC1=CC=C(C=C1C=C(C(=O)O)C(C)C(=O)O)C=C1O                                               |
| 1448 | 4. 531 | 109. 02869 | CATECHOL                                                                                                                           | [M-H] <sup>-</sup> | 109. 029   | C6H602      | Catechols                                        | YCTMNLNLNPGFHC-UHFFFAOYSA-N | OC=1C=CC=CC1O                                                                          |
| 1449 | 4. 535 | 316. 2113  | [5-hydroxy-3-(hydroxymethyl)-2-oxo-6-propan-2-ylcyclohex-3-en-1-yl] 3-methylpentanoate                                             | [M+H] <sup>+</sup> | 316. 21182 | C16H2605    | Menthane monoterpenoids                          | BUOADWXPJXXRM-UHFFFAOYSA-N  | O=C(OC1C(=O)C(=CC(O)C1C(C)C)CO)CC(C)CC                                                 |
| 1450 | 4. 541 | 188. 03438 | 4-HYDROXY-2-QUINOLINECARBOXYLIC ACID                                                                                               | [M-H] <sup>-</sup> | 188. 035   | C10H7N03    | Quinoline carboxylic acids                       | HCZHIE1FKROPDY-UHFFFAOYSA-N | O=C(O)C1C(=C(C=O)C=CC=CC2N1                                                            |
| 1451 | 4. 542 | 167. 03738 | 3,4-Dihydroxyphenylacetic acid                                                                                                     | [M-H] <sup>-</sup> | 167. 03499 | C8H804      | Catechols                                        | CFPZDZCDUFSOFZ-UHFFFAOYSA-N | O=C(O)CC1=CC=C(O)C(C)=C1                                                               |
| 1452 | 4. 543 | 120. 08041 | Indoline                                                                                                                           | [M+H] <sup>+</sup> | 120. 08077 | C8H9N       | Indolines                                        | LPAGFVYQRIESJQ-UHFFFAOYSA-N | C1=CC=C2C(=C1)CCN2                                                                     |
| 1453 | 4. 543 | 208. 09602 | N-Acetylphenylalanine                                                                                                              | [M+H] <sup>+</sup> | 208. 09682 | C11H13N03   | Phenylalanine and derivatives                    | CPQJSKFNMDLON-UHFFFAOYNA-N  | O=C(O)C(C(N=C(O)C)CC=1C=CC=CC1                                                         |
| 1454 | 4. 544 | 275. 01813 | 6-Phospho-D-gluconic acid                                                                                                          | [M-H] <sup>-</sup> | 275. 01736 | C6H13010P   | Monosaccharide phosphates                        | BTBSGZKFKXLSJQ-SQOUCZDYSA-N | O[C@H](COP(O)(O)=O)[C@H](O)[C@H](O)[C@H](O)C(O)=O                                      |
| 1455 | 4. 545 | 429. 20035 | elegantissine                                                                                                                      | [M+H] <sup>+</sup> | 429. 20001 | C23H28N206  | Indolizidines                                    | TIWZEO1NXXJHCY-DWROLHPLSA-N | O=C(OC)C1=CC(C)C2CN3CC4(C(=O)NC5=C(OC)C(OC)=CC=C54)C3CC12                              |
| 1456 | 4. 549 | 367. 20892 | 3-[2-(6,7-dihydroxy-1,2,4a-trimethylspiro[3,4,6,7,8,8a-hexahydro-2H-naphthalene-5,2'-oxirane]-1-yl)ethyl]-2-hydroxy-2H-furan-5-one | [M+H] <sup>+</sup> | 367. 21152 | C20H3006    | Butenolides                                      | QMWJAHMURTIJMQ-UHFFFAOYSA-N | O=C1OC(C)C(=C1)CCC2(C)C(C)CC3(C)C2OC(C)C(C)C43OC4                                      |
| 1457 | 4. 549 | 534. 34595 | 9-hydroxy-5b,8,11a-trimethyl-1-prop-1-en-2-yl-1,2,3,4,5,6,7,7a,9,10,11,11b,12,13,13a,13b-                                          | [M+H] <sup>+</sup> | 534. 34253 | C30H4407    | Triterpenoids                                    | FTKGHGVFGGOMW-UHFFFAOYSA-N  | O=C(O)C12CCC(C(=C(C)C)C2C3CC4C5(C)CCC(O)C(C(=O)O)C(C)C5C(C4)C)C3(C(=O)O)C1             |
| 1458 | 4. 552 | 233. 00833 | FT-sulfone                                                                                                                         | [M-H] <sup>-</sup> | 233. 01009 | C6H9F304S   | PFSA                                             | FTHRJQNFESLACH-UHFFFAOYSA-N | O=C(O)CCS(=O)(=O)CCC(F)F                                                               |
| 1459 | 4. 562 | 562. 25378 | (S)-2-(((S)-7-acetamido-1,2,3-trimethoxy-9-oxo-5,6,7,9-tetrahydrobenzofalantalen-10-yl)amino)-N-(4-methoxyphenyl)propanamide       | [M+H] <sup>+</sup> | 562. 26001 | C31H35N307  | Alpha amino acid amides                          | RVLHHzKCFQNH1I-XDHUDOTRSA-N | O=C1C=C2C(=CC(C1NC(=O)NC3=CC=C(OC)C=C3)C)C4=C(OC)C(CO)C(=O)C(=O)C=C4CC(C)C2NC(=O)C     |
| 1460 | 4. 563 | 322. 09183 | Metazachlor ESA                                                                                                                    | [M-H] <sup>-</sup> | 322. 0867  | C14H17N304S | Anilides                                         | IPVCEPCEVHQOV-UHFFFAOYSA-N  | CC1=CC=CC(C)=C1N(CN1C=CC=N1)C(=O)CS(O)(=O)=O                                           |

|      |       |           |                                                                                                                                                                                                       |                      |           |              |                                                  |                              |                                                                                                                                                                                                                                                                                                                                                                                                                                                                                                                                                                                                                                                                                                                                                                                                                                                                                                                                                                                                                                                                                                                                                                                                                                                                                                                                                                                                                                                                                                                                                                                                                                                                                                                                                                                                                                                                                                                                                                                                                                                                                                                                                                                                                                                                                                                                                                                                                                                                                                                                                                                                                                                                                                                                                                                                                                                                                                                                                                                                                                                                                                                                                                                                                                                                                                                                                                                                                                                                                                                                                                                                                                                                                                                                                                                                                                                                                                                                                                                                                                                                                                                                                                                                                                                                                                                                                                                                                                                                                                                                                                                                                                                                                                                                                                                                                                                                                                                                                                                                                                                                                                                                                                                                                                                                                                                                                                                                                                                                                                                                             |
|------|-------|-----------|-------------------------------------------------------------------------------------------------------------------------------------------------------------------------------------------------------|----------------------|-----------|--------------|--------------------------------------------------|------------------------------|---------------------------------------------------------------------------------------------------------------------------------------------------------------------------------------------------------------------------------------------------------------------------------------------------------------------------------------------------------------------------------------------------------------------------------------------------------------------------------------------------------------------------------------------------------------------------------------------------------------------------------------------------------------------------------------------------------------------------------------------------------------------------------------------------------------------------------------------------------------------------------------------------------------------------------------------------------------------------------------------------------------------------------------------------------------------------------------------------------------------------------------------------------------------------------------------------------------------------------------------------------------------------------------------------------------------------------------------------------------------------------------------------------------------------------------------------------------------------------------------------------------------------------------------------------------------------------------------------------------------------------------------------------------------------------------------------------------------------------------------------------------------------------------------------------------------------------------------------------------------------------------------------------------------------------------------------------------------------------------------------------------------------------------------------------------------------------------------------------------------------------------------------------------------------------------------------------------------------------------------------------------------------------------------------------------------------------------------------------------------------------------------------------------------------------------------------------------------------------------------------------------------------------------------------------------------------------------------------------------------------------------------------------------------------------------------------------------------------------------------------------------------------------------------------------------------------------------------------------------------------------------------------------------------------------------------------------------------------------------------------------------------------------------------------------------------------------------------------------------------------------------------------------------------------------------------------------------------------------------------------------------------------------------------------------------------------------------------------------------------------------------------------------------------------------------------------------------------------------------------------------------------------------------------------------------------------------------------------------------------------------------------------------------------------------------------------------------------------------------------------------------------------------------------------------------------------------------------------------------------------------------------------------------------------------------------------------------------------------------------------------------------------------------------------------------------------------------------------------------------------------------------------------------------------------------------------------------------------------------------------------------------------------------------------------------------------------------------------------------------------------------------------------------------------------------------------------------------------------------------------------------------------------------------------------------------------------------------------------------------------------------------------------------------------------------------------------------------------------------------------------------------------------------------------------------------------------------------------------------------------------------------------------------------------------------------------------------------------------------------------------------------------------------------------------------------------------------------------------------------------------------------------------------------------------------------------------------------------------------------------------------------------------------------------------------------------------------------------------------------------------------------------------------------------------------------------------------------------------------------------------------------------------------------|
| 1461 | 4.564 | 255.12265 | DL-Liquiritigenin                                                                                                                                                                                     | [M-H] <sup>-</sup>   | 255.12166 | C15H12O4     | Flavanones                                       | FURUXTVLHOCNA-UHFFFAOYSA-N   | O=C1C2=CC(=O)C=C2OC(C3=CC(=O)C=C3)C1                                                                                                                                                                                                                                                                                                                                                                                                                                                                                                                                                                                                                                                                                                                                                                                                                                                                                                                                                                                                                                                                                                                                                                                                                                                                                                                                                                                                                                                                                                                                                                                                                                                                                                                                                                                                                                                                                                                                                                                                                                                                                                                                                                                                                                                                                                                                                                                                                                                                                                                                                                                                                                                                                                                                                                                                                                                                                                                                                                                                                                                                                                                                                                                                                                                                                                                                                                                                                                                                                                                                                                                                                                                                                                                                                                                                                                                                                                                                                                                                                                                                                                                                                                                                                                                                                                                                                                                                                                                                                                                                                                                                                                                                                                                                                                                                                                                                                                                                                                                                                                                                                                                                                                                                                                                                                                                                                                                                                                                                                                        |
| 1462 | 4.568 | 217.09651 | 4-Formyl-antipyrine                                                                                                                                                                                   | [M-H] <sup>+</sup>   | 217.09715 | C12H12N2O2   | Phenylpyrazoles                                  | QFYZYDOEJZMDX-UHFFFAOYSA-N   | CN1N(C(=O)C(C=O)=C1)C1=CC=CC=C1                                                                                                                                                                                                                                                                                                                                                                                                                                                                                                                                                                                                                                                                                                                                                                                                                                                                                                                                                                                                                                                                                                                                                                                                                                                                                                                                                                                                                                                                                                                                                                                                                                                                                                                                                                                                                                                                                                                                                                                                                                                                                                                                                                                                                                                                                                                                                                                                                                                                                                                                                                                                                                                                                                                                                                                                                                                                                                                                                                                                                                                                                                                                                                                                                                                                                                                                                                                                                                                                                                                                                                                                                                                                                                                                                                                                                                                                                                                                                                                                                                                                                                                                                                                                                                                                                                                                                                                                                                                                                                                                                                                                                                                                                                                                                                                                                                                                                                                                                                                                                                                                                                                                                                                                                                                                                                                                                                                                                                                                                                             |
| 1463 | 4.573 | 357.17981 | Arnicolide C                                                                                                                                                                                          | [M-H] <sup>+</sup>   | 357.17001 | C19H26O5     | Sesquiterpene lactones                           | WKUOPGZYLRFCHJ-APDQSUKSA-N   | O=C(OC1C2C(OC(=O)C2)CC(C)C3CC(=O)C13)C(C)C                                                                                                                                                                                                                                                                                                                                                                                                                                                                                                                                                                                                                                                                                                                                                                                                                                                                                                                                                                                                                                                                                                                                                                                                                                                                                                                                                                                                                                                                                                                                                                                                                                                                                                                                                                                                                                                                                                                                                                                                                                                                                                                                                                                                                                                                                                                                                                                                                                                                                                                                                                                                                                                                                                                                                                                                                                                                                                                                                                                                                                                                                                                                                                                                                                                                                                                                                                                                                                                                                                                                                                                                                                                                                                                                                                                                                                                                                                                                                                                                                                                                                                                                                                                                                                                                                                                                                                                                                                                                                                                                                                                                                                                                                                                                                                                                                                                                                                                                                                                                                                                                                                                                                                                                                                                                                                                                                                                                                                                                                                  |
| 1464 | 4.582 | 308.11105 | Tolnaftate                                                                                                                                                                                            | [M-H] <sup>+</sup>   | 308.10999 | C19H17NO5    | Naphthalenes                                     | FUSMLNFJXSJDI-UHFFFAOYSA-N   | S=C(OC(=O)C-CO-2C-CC(=C2C1)N(C3=CO-CC(=C3)C)C                                                                                                                                                                                                                                                                                                                                                                                                                                                                                                                                                                                                                                                                                                                                                                                                                                                                                                                                                                                                                                                                                                                                                                                                                                                                                                                                                                                                                                                                                                                                                                                                                                                                                                                                                                                                                                                                                                                                                                                                                                                                                                                                                                                                                                                                                                                                                                                                                                                                                                                                                                                                                                                                                                                                                                                                                                                                                                                                                                                                                                                                                                                                                                                                                                                                                                                                                                                                                                                                                                                                                                                                                                                                                                                                                                                                                                                                                                                                                                                                                                                                                                                                                                                                                                                                                                                                                                                                                                                                                                                                                                                                                                                                                                                                                                                                                                                                                                                                                                                                                                                                                                                                                                                                                                                                                                                                                                                                                                                                                               |
| 1465 | 4.588 | 301.11749 | Pesticide9_Desmedipham_C16H16N2O4_3-[(Ethoxycarbonyl)amino]phenyl phenylcarbamate                                                                                                                     | [M-H] <sup>+</sup>   | 301.11801 | C16H16N2O4   | Phenylcarbamic acid esters                       | WJZJMKBKWXKTQ-UHFFFAOYSA-N   | OC(=NC(=O)CC(=O)C)=2C=CC(=N(C(=O)O)CC)C2                                                                                                                                                                                                                                                                                                                                                                                                                                                                                                                                                                                                                                                                                                                                                                                                                                                                                                                                                                                                                                                                                                                                                                                                                                                                                                                                                                                                                                                                                                                                                                                                                                                                                                                                                                                                                                                                                                                                                                                                                                                                                                                                                                                                                                                                                                                                                                                                                                                                                                                                                                                                                                                                                                                                                                                                                                                                                                                                                                                                                                                                                                                                                                                                                                                                                                                                                                                                                                                                                                                                                                                                                                                                                                                                                                                                                                                                                                                                                                                                                                                                                                                                                                                                                                                                                                                                                                                                                                                                                                                                                                                                                                                                                                                                                                                                                                                                                                                                                                                                                                                                                                                                                                                                                                                                                                                                                                                                                                                                                                    |
| 1466 | 4.591 | 171.06548 | 1,4-Cyclohexanedicarboxylic acid                                                                                                                                                                      | [M-H] <sup>-</sup>   | 171.06628 | C8H12O4      | Dicarboxylic acids and derivatives               | PGZQGDETEZPERC-UHFFFAOYSA-N  | O=C(O)C1CCC(C(=O)O)CC1                                                                                                                                                                                                                                                                                                                                                                                                                                                                                                                                                                                                                                                                                                                                                                                                                                                                                                                                                                                                                                                                                                                                                                                                                                                                                                                                                                                                                                                                                                                                                                                                                                                                                                                                                                                                                                                                                                                                                                                                                                                                                                                                                                                                                                                                                                                                                                                                                                                                                                                                                                                                                                                                                                                                                                                                                                                                                                                                                                                                                                                                                                                                                                                                                                                                                                                                                                                                                                                                                                                                                                                                                                                                                                                                                                                                                                                                                                                                                                                                                                                                                                                                                                                                                                                                                                                                                                                                                                                                                                                                                                                                                                                                                                                                                                                                                                                                                                                                                                                                                                                                                                                                                                                                                                                                                                                                                                                                                                                                                                                      |
| 1467 | 4.594 | 254.06645 | methyl 2-[(2,3-dihydroxybenzoyl)amino]-3-hydroxypropanoate                                                                                                                                            | [M-H] <sup>-</sup>   | 254.067   | C11H13NO6    | Hippuric acids and derivatives                   | NQIZIOLKJAGJU-UHFFFAOYSA-N   | O=C(OC)C(N(=O)C=C1C=CC(=O)C1)CO                                                                                                                                                                                                                                                                                                                                                                                                                                                                                                                                                                                                                                                                                                                                                                                                                                                                                                                                                                                                                                                                                                                                                                                                                                                                                                                                                                                                                                                                                                                                                                                                                                                                                                                                                                                                                                                                                                                                                                                                                                                                                                                                                                                                                                                                                                                                                                                                                                                                                                                                                                                                                                                                                                                                                                                                                                                                                                                                                                                                                                                                                                                                                                                                                                                                                                                                                                                                                                                                                                                                                                                                                                                                                                                                                                                                                                                                                                                                                                                                                                                                                                                                                                                                                                                                                                                                                                                                                                                                                                                                                                                                                                                                                                                                                                                                                                                                                                                                                                                                                                                                                                                                                                                                                                                                                                                                                                                                                                                                                                             |
| 1468 | 4.596 | 481.12912 | Lusitanicoside                                                                                                                                                                                        | [M-H] <sup>+</sup>   | 481.13086 | C21H30O10    | Phenolic glycosides                              | DAELTIGCCPYTP-ZLQZEYEIS-N    | OC1C(O)C(OC2OC(OC3=CC(=O)C(CO)CC(C)C(O)C2)OC(C1)C                                                                                                                                                                                                                                                                                                                                                                                                                                                                                                                                                                                                                                                                                                                                                                                                                                                                                                                                                                                                                                                                                                                                                                                                                                                                                                                                                                                                                                                                                                                                                                                                                                                                                                                                                                                                                                                                                                                                                                                                                                                                                                                                                                                                                                                                                                                                                                                                                                                                                                                                                                                                                                                                                                                                                                                                                                                                                                                                                                                                                                                                                                                                                                                                                                                                                                                                                                                                                                                                                                                                                                                                                                                                                                                                                                                                                                                                                                                                                                                                                                                                                                                                                                                                                                                                                                                                                                                                                                                                                                                                                                                                                                                                                                                                                                                                                                                                                                                                                                                                                                                                                                                                                                                                                                                                                                                                                                                                                                                                                           |
| 1469 | 4.603 | 299.10245 | Scutellarein 4'-methyl ether                                                                                                                                                                          | [M-H] <sup>-</sup>   | 299.10306 | C16H12O6     | 4'-O-methylated flavonoids                       | XVMEYCPXYZLAI-UHFFFAOYSA-N   | O=C1C=C(OC2=CC(O)=C(C)C(O)=C12)C=3C=CC(OC)=CC3                                                                                                                                                                                                                                                                                                                                                                                                                                                                                                                                                                                                                                                                                                                                                                                                                                                                                                                                                                                                                                                                                                                                                                                                                                                                                                                                                                                                                                                                                                                                                                                                                                                                                                                                                                                                                                                                                                                                                                                                                                                                                                                                                                                                                                                                                                                                                                                                                                                                                                                                                                                                                                                                                                                                                                                                                                                                                                                                                                                                                                                                                                                                                                                                                                                                                                                                                                                                                                                                                                                                                                                                                                                                                                                                                                                                                                                                                                                                                                                                                                                                                                                                                                                                                                                                                                                                                                                                                                                                                                                                                                                                                                                                                                                                                                                                                                                                                                                                                                                                                                                                                                                                                                                                                                                                                                                                                                                                                                                                                              |
| 1470 | 4.604 | 339.11752 | Licodione base + 30, 2Prenyl                                                                                                                                                                          | [M-H] <sup>-</sup>   | 339.12079 | C20H20O5     | Prenylated licodiones                            | I3XMKVKYGAGJGJ-UHFFFAOYSA-N  | O=C(C(=O)C1=CC=C(C)C=C1)C=2C=C(C(=O)=CC=2(O))CC=C(C)C                                                                                                                                                                                                                                                                                                                                                                                                                                                                                                                                                                                                                                                                                                                                                                                                                                                                                                                                                                                                                                                                                                                                                                                                                                                                                                                                                                                                                                                                                                                                                                                                                                                                                                                                                                                                                                                                                                                                                                                                                                                                                                                                                                                                                                                                                                                                                                                                                                                                                                                                                                                                                                                                                                                                                                                                                                                                                                                                                                                                                                                                                                                                                                                                                                                                                                                                                                                                                                                                                                                                                                                                                                                                                                                                                                                                                                                                                                                                                                                                                                                                                                                                                                                                                                                                                                                                                                                                                                                                                                                                                                                                                                                                                                                                                                                                                                                                                                                                                                                                                                                                                                                                                                                                                                                                                                                                                                                                                                                                                       |
| 1471 | 4.615 | 153.01921 | 2,3-Dihydroxybenzoic acid                                                                                                                                                                             | [M-H] <sup>-</sup>   | 153.01933 | C7H6O4       | Salicylic acids                                  | GLDQAMCGOIJDV-UHFFFAOYSA-N   | O=C(O)C(=O)C=C(C(=O)C)O                                                                                                                                                                                                                                                                                                                                                                                                                                                                                                                                                                                                                                                                                                                                                                                                                                                                                                                                                                                                                                                                                                                                                                                                                                                                                                                                                                                                                                                                                                                                                                                                                                                                                                                                                                                                                                                                                                                                                                                                                                                                                                                                                                                                                                                                                                                                                                                                                                                                                                                                                                                                                                                                                                                                                                                                                                                                                                                                                                                                                                                                                                                                                                                                                                                                                                                                                                                                                                                                                                                                                                                                                                                                                                                                                                                                                                                                                                                                                                                                                                                                                                                                                                                                                                                                                                                                                                                                                                                                                                                                                                                                                                                                                                                                                                                                                                                                                                                                                                                                                                                                                                                                                                                                                                                                                                                                                                                                                                                                                                                     |
| 1472 | 4.617 | 204.02948 | XANTHURENIC ACID                                                                                                                                                                                      | [M-H] <sup>-</sup>   | 204.03    | C10H7NO4     | Quinoline carboxylic acids                       | FBZXONHGGBHHY-UHFFFAOYSA-N   | O=C(O)C1=CC(=O)C=C2C=CC(=O)C2CN1                                                                                                                                                                                                                                                                                                                                                                                                                                                                                                                                                                                                                                                                                                                                                                                                                                                                                                                                                                                                                                                                                                                                                                                                                                                                                                                                                                                                                                                                                                                                                                                                                                                                                                                                                                                                                                                                                                                                                                                                                                                                                                                                                                                                                                                                                                                                                                                                                                                                                                                                                                                                                                                                                                                                                                                                                                                                                                                                                                                                                                                                                                                                                                                                                                                                                                                                                                                                                                                                                                                                                                                                                                                                                                                                                                                                                                                                                                                                                                                                                                                                                                                                                                                                                                                                                                                                                                                                                                                                                                                                                                                                                                                                                                                                                                                                                                                                                                                                                                                                                                                                                                                                                                                                                                                                                                                                                                                                                                                                                                            |
| 1473 | 4.618 | 207.0112  | 2-Naphthalenesulfonic acid                                                                                                                                                                            | [M-H] <sup>-</sup>   | 207.01213 | C10H8O3S     | 2-naphthalene sulfonates                         | KVBGVZZKJNLNJU-UHFFFAOYSA-N  | OS(=O)(=O)C1=CC2=CC=CC=C2C=C1                                                                                                                                                                                                                                                                                                                                                                                                                                                                                                                                                                                                                                                                                                                                                                                                                                                                                                                                                                                                                                                                                                                                                                                                                                                                                                                                                                                                                                                                                                                                                                                                                                                                                                                                                                                                                                                                                                                                                                                                                                                                                                                                                                                                                                                                                                                                                                                                                                                                                                                                                                                                                                                                                                                                                                                                                                                                                                                                                                                                                                                                                                                                                                                                                                                                                                                                                                                                                                                                                                                                                                                                                                                                                                                                                                                                                                                                                                                                                                                                                                                                                                                                                                                                                                                                                                                                                                                                                                                                                                                                                                                                                                                                                                                                                                                                                                                                                                                                                                                                                                                                                                                                                                                                                                                                                                                                                                                                                                                                                                               |
| 1474 | 4.62  | 317.11447 | Rhodocladonic Acid                                                                                                                                                                                    | [M-H] <sup>-</sup>   | 317.11322 | C15H10O8     | Naphthofurans                                    | XKWWCTISHMFJB-UHFFFAOYSA-N   | O=C1C(=O)C=2C(O)=C3C(O)=(OC3=CC2(=O)=C1OC)C(=O)C                                                                                                                                                                                                                                                                                                                                                                                                                                                                                                                                                                                                                                                                                                                                                                                                                                                                                                                                                                                                                                                                                                                                                                                                                                                                                                                                                                                                                                                                                                                                                                                                                                                                                                                                                                                                                                                                                                                                                                                                                                                                                                                                                                                                                                                                                                                                                                                                                                                                                                                                                                                                                                                                                                                                                                                                                                                                                                                                                                                                                                                                                                                                                                                                                                                                                                                                                                                                                                                                                                                                                                                                                                                                                                                                                                                                                                                                                                                                                                                                                                                                                                                                                                                                                                                                                                                                                                                                                                                                                                                                                                                                                                                                                                                                                                                                                                                                                                                                                                                                                                                                                                                                                                                                                                                                                                                                                                                                                                                                                            |
| 1475 | 4.623 | 217.10738 | Hydroxysebacic acid                                                                                                                                                                                   | [M-H] <sup>-</sup>   | 217.10789 | C10H18O5     | Organic acids                                    | OQYZCKCJQHIE-UHFFFAOYNA-N    | O=C(O)CCCCCCC(O)CC(=O)O                                                                                                                                                                                                                                                                                                                                                                                                                                                                                                                                                                                                                                                                                                                                                                                                                                                                                                                                                                                                                                                                                                                                                                                                                                                                                                                                                                                                                                                                                                                                                                                                                                                                                                                                                                                                                                                                                                                                                                                                                                                                                                                                                                                                                                                                                                                                                                                                                                                                                                                                                                                                                                                                                                                                                                                                                                                                                                                                                                                                                                                                                                                                                                                                                                                                                                                                                                                                                                                                                                                                                                                                                                                                                                                                                                                                                                                                                                                                                                                                                                                                                                                                                                                                                                                                                                                                                                                                                                                                                                                                                                                                                                                                                                                                                                                                                                                                                                                                                                                                                                                                                                                                                                                                                                                                                                                                                                                                                                                                                                                     |
| 1476 | 4.629 | 269.11374 | Galangin                                                                                                                                                                                              | [M-H] <sup>-</sup>   | 269.11237 | C15H10O5     | Flavonols                                        | VCCRNZQBSJXYJD-UHFFFAOYSA-N  | O=C1C(O)=C(OC=2C(C)C(C(=O)C12)C=3C=CC=CC3                                                                                                                                                                                                                                                                                                                                                                                                                                                                                                                                                                                                                                                                                                                                                                                                                                                                                                                                                                                                                                                                                                                                                                                                                                                                                                                                                                                                                                                                                                                                                                                                                                                                                                                                                                                                                                                                                                                                                                                                                                                                                                                                                                                                                                                                                                                                                                                                                                                                                                                                                                                                                                                                                                                                                                                                                                                                                                                                                                                                                                                                                                                                                                                                                                                                                                                                                                                                                                                                                                                                                                                                                                                                                                                                                                                                                                                                                                                                                                                                                                                                                                                                                                                                                                                                                                                                                                                                                                                                                                                                                                                                                                                                                                                                                                                                                                                                                                                                                                                                                                                                                                                                                                                                                                                                                                                                                                                                                                                                                                   |
| 1477 | 4.635 | 301.09186 | 2-(3-hydroxy-5-methoxyphenoxy)-6-(hydroxymethyl)oxane-3,4,5-triol                                                                                                                                     | [M-H] <sup>-</sup>   | 301.0929  | C13H18O8     | Phenolic glycosides                              | SJBWDSQMCPAGHA-UHFFFAOYSA-N  | OC=1C=C(OC)C(C(OC2OC(CO)C(C)C(O)C2)O)C1                                                                                                                                                                                                                                                                                                                                                                                                                                                                                                                                                                                                                                                                                                                                                                                                                                                                                                                                                                                                                                                                                                                                                                                                                                                                                                                                                                                                                                                                                                                                                                                                                                                                                                                                                                                                                                                                                                                                                                                                                                                                                                                                                                                                                                                                                                                                                                                                                                                                                                                                                                                                                                                                                                                                                                                                                                                                                                                                                                                                                                                                                                                                                                                                                                                                                                                                                                                                                                                                                                                                                                                                                                                                                                                                                                                                                                                                                                                                                                                                                                                                                                                                                                                                                                                                                                                                                                                                                                                                                                                                                                                                                                                                                                                                                                                                                                                                                                                                                                                                                                                                                                                                                                                                                                                                                                                                                                                                                                                                                                     |
| 1478 | 4.648 | 363.23743 | 2-[(2E)-3,7-dimethylocta-2,6-dienyl]-3-methoxy-5-(2-phenylethyl)phenol                                                                                                                                | [M-H] <sup>-</sup>   | 363.23294 | C25H32O2     | Stilbenes                                        | ZDSBUUDXDQSCSK-DIEDYNTISA-N  | OC=1C=C(C(=O)OC)C1CC=C(C)CCC=C(C)C)CCC=2C=CC=CC2                                                                                                                                                                                                                                                                                                                                                                                                                                                                                                                                                                                                                                                                                                                                                                                                                                                                                                                                                                                                                                                                                                                                                                                                                                                                                                                                                                                                                                                                                                                                                                                                                                                                                                                                                                                                                                                                                                                                                                                                                                                                                                                                                                                                                                                                                                                                                                                                                                                                                                                                                                                                                                                                                                                                                                                                                                                                                                                                                                                                                                                                                                                                                                                                                                                                                                                                                                                                                                                                                                                                                                                                                                                                                                                                                                                                                                                                                                                                                                                                                                                                                                                                                                                                                                                                                                                                                                                                                                                                                                                                                                                                                                                                                                                                                                                                                                                                                                                                                                                                                                                                                                                                                                                                                                                                                                                                                                                                                                                                                            |
| 1479 | 4.651 | 587.29132 | [(2R,3S,4S,5R,6S)-6-[3,5-dihydroxy-4-{3-(4-hydroxyphenyl)orphanovyl}phenoxy]-3,4,5-trihydroxyoxan-2-yl)methyl 3,4,5-                                                                                  | [M-H] <sup>-</sup>   | 587.29706 | C28H28O14    | Flavonoid O-glycosides                           | YPFUHFNAEWDRD-ZKPBI.SLZSA-N  | O=C(OC1OC(OC2=CC(O)=C(C)C(=O)C2)C(C)OC1C3=CC=C(C)C(C3)C                                                                                                                                                                                                                                                                                                                                                                                                                                                                                                                                                                                                                                                                                                                                                                                                                                                                                                                                                                                                                                                                                                                                                                                                                                                                                                                                                                                                                                                                                                                                                                                                                                                                                                                                                                                                                                                                                                                                                                                                                                                                                                                                                                                                                                                                                                                                                                                                                                                                                                                                                                                                                                                                                                                                                                                                                                                                                                                                                                                                                                                                                                                                                                                                                                                                                                                                                                                                                                                                                                                                                                                                                                                                                                                                                                                                                                                                                                                                                                                                                                                                                                                                                                                                                                                                                                                                                                                                                                                                                                                                                                                                                                                                                                                                                                                                                                                                                                                                                                                                                                                                                                                                                                                                                                                                                                                                                                                                                                                                                     |
| 1480 | 4.653 | 370.07071 | Pesticide6_Diniconazole_C15H17Cl2N3O_(1E)-1-(2,4-Dichlorophenyl)-4,4-dimethyl-2-((1E-1,2,4-triazol-1-yl)pent-1-en-3-yl)                                                                               | [M-H] <sup>-</sup>   | 370.073   | C15H17Cl2N3O | Cinnamyl alcohols                                | FBOUTAKEJMZPGG-WNNJVPZSA-N   | C1C1=CC=C(C=C(N2N=CN=C2)C(O)C(C)C(C)C(C1)=C1                                                                                                                                                                                                                                                                                                                                                                                                                                                                                                                                                                                                                                                                                                                                                                                                                                                                                                                                                                                                                                                                                                                                                                                                                                                                                                                                                                                                                                                                                                                                                                                                                                                                                                                                                                                                                                                                                                                                                                                                                                                                                                                                                                                                                                                                                                                                                                                                                                                                                                                                                                                                                                                                                                                                                                                                                                                                                                                                                                                                                                                                                                                                                                                                                                                                                                                                                                                                                                                                                                                                                                                                                                                                                                                                                                                                                                                                                                                                                                                                                                                                                                                                                                                                                                                                                                                                                                                                                                                                                                                                                                                                                                                                                                                                                                                                                                                                                                                                                                                                                                                                                                                                                                                                                                                                                                                                                                                                                                                                                                |
| 1481 | 4.658 | 224.12704 | 4-Hydroxybenzoylecholine                                                                                                                                                                              | [M-H] <sup>+</sup>   | 224.12756 | C12H18NO3    | Benzoic acid esters                              | BAPAICNRGTBJT-UHFFFAOYSA-O   | C[N+](C)(C)CCCC(O)=C1C=CC(=O)C=C1                                                                                                                                                                                                                                                                                                                                                                                                                                                                                                                                                                                                                                                                                                                                                                                                                                                                                                                                                                                                                                                                                                                                                                                                                                                                                                                                                                                                                                                                                                                                                                                                                                                                                                                                                                                                                                                                                                                                                                                                                                                                                                                                                                                                                                                                                                                                                                                                                                                                                                                                                                                                                                                                                                                                                                                                                                                                                                                                                                                                                                                                                                                                                                                                                                                                                                                                                                                                                                                                                                                                                                                                                                                                                                                                                                                                                                                                                                                                                                                                                                                                                                                                                                                                                                                                                                                                                                                                                                                                                                                                                                                                                                                                                                                                                                                                                                                                                                                                                                                                                                                                                                                                                                                                                                                                                                                                                                                                                                                                                                           |
| 1482 | 4.658 | 315.11966 | Pinoqueretin                                                                                                                                                                                          | [M-H] <sup>-</sup>   | 315.11609 | C16H12O7     | Flavonols                                        | DTFXGVGIKNSQQ-UHFFFAOYSA-N   | O=C1C(O)=C(OC2=CC(O)=C(C)=C12)C=C3C=CC(O)=C(O)C3                                                                                                                                                                                                                                                                                                                                                                                                                                                                                                                                                                                                                                                                                                                                                                                                                                                                                                                                                                                                                                                                                                                                                                                                                                                                                                                                                                                                                                                                                                                                                                                                                                                                                                                                                                                                                                                                                                                                                                                                                                                                                                                                                                                                                                                                                                                                                                                                                                                                                                                                                                                                                                                                                                                                                                                                                                                                                                                                                                                                                                                                                                                                                                                                                                                                                                                                                                                                                                                                                                                                                                                                                                                                                                                                                                                                                                                                                                                                                                                                                                                                                                                                                                                                                                                                                                                                                                                                                                                                                                                                                                                                                                                                                                                                                                                                                                                                                                                                                                                                                                                                                                                                                                                                                                                                                                                                                                                                                                                                                            |
| 1483 | 4.66  | 503.24872 | 4-[(E)-3-[(2R,3R,4S,5S,6R)-3-{[(2S,3R,4R)-3,4-dihydroxy-4-(hydroxymethyl)oxolan-2-yl]oxy}-5,6-dihydroxy-6-(hydroxymethyl)oxan-2-yl]-3aS,8R,8aR)-8-hydroxy-6,8-dimethyl-3-methylidene-2-oxo-3a,4,5,8a- | [M-H] <sup>+</sup>   | 503.24869 | C24H38O11    | Fatty acyl glycosides of mono- and disaccharides | IDPRQTHASGHSD-BTOUMF1XSA-N   | O=C1C=C(C)C(C=CC(OC2OC(CO)C(C)C(OC2)OC(CO)C(CO)C(CO)C1)C(C                                                                                                                                                                                                                                                                                                                                                                                                                                                                                                                                                                                                                                                                                                                                                                                                                                                                                                                                                                                                                                                                                                                                                                                                                                                                                                                                                                                                                                                                                                                                                                                                                                                                                                                                                                                                                                                                                                                                                                                                                                                                                                                                                                                                                                                                                                                                                                                                                                                                                                                                                                                                                                                                                                                                                                                                                                                                                                                                                                                                                                                                                                                                                                                                                                                                                                                                                                                                                                                                                                                                                                                                                                                                                                                                                                                                                                                                                                                                                                                                                                                                                                                                                                                                                                                                                                                                                                                                                                                                                                                                                                                                                                                                                                                                                                                                                                                                                                                                                                                                                                                                                                                                                                                                                                                                                                                                                                                                                                                                                  |
| 1484 | 4.667 | 279.14386 | tetrahydrocyclohepta[b]furan-7-yl]propanoic acid                                                                                                                                                      | [M-H] <sup>-</sup>   | 279.14893 | C15H20O5     | Terpene lactones                                 | PPUVIGSWLRHCY-PSPSQSSA-N     | O=C1OC2C(C1=C)CCC(=C(CCC(=O)O)C2(O)C)C                                                                                                                                                                                                                                                                                                                                                                                                                                                                                                                                                                                                                                                                                                                                                                                                                                                                                                                                                                                                                                                                                                                                                                                                                                                                                                                                                                                                                                                                                                                                                                                                                                                                                                                                                                                                                                                                                                                                                                                                                                                                                                                                                                                                                                                                                                                                                                                                                                                                                                                                                                                                                                                                                                                                                                                                                                                                                                                                                                                                                                                                                                                                                                                                                                                                                                                                                                                                                                                                                                                                                                                                                                                                                                                                                                                                                                                                                                                                                                                                                                                                                                                                                                                                                                                                                                                                                                                                                                                                                                                                                                                                                                                                                                                                                                                                                                                                                                                                                                                                                                                                                                                                                                                                                                                                                                                                                                                                                                                                                                      |
| 1485 | 4.668 | 457.19702 | 2,7,7,11,15,17-hexamethyl-18-methylidene-5,13,16-trioxo-6,14-dioxatetracyclo[9.8.0.02,9.022,22]nonadec-3-en-10-yl acetate                                                                             | [M-H] <sup>-</sup>   | 457.19882 | C26H34O7     | Naphthopyrans                                    | JFYFYCQXZYIOBKU-UHFFFAOYSA-N | O=C1OC(C)(C)C2CC(OC(=O)C)C3(C)C4C(=O)OC(C(=O)C4(C)=C(C)C3C2(C1)C)C                                                                                                                                                                                                                                                                                                                                                                                                                                                                                                                                                                                                                                                                                                                                                                                                                                                                                                                                                                                                                                                                                                                                                                                                                                                                                                                                                                                                                                                                                                                                                                                                                                                                                                                                                                                                                                                                                                                                                                                                                                                                                                                                                                                                                                                                                                                                                                                                                                                                                                                                                                                                                                                                                                                                                                                                                                                                                                                                                                                                                                                                                                                                                                                                                                                                                                                                                                                                                                                                                                                                                                                                                                                                                                                                                                                                                                                                                                                                                                                                                                                                                                                                                                                                                                                                                                                                                                                                                                                                                                                                                                                                                                                                                                                                                                                                                                                                                                                                                                                                                                                                                                                                                                                                                                                                                                                                                                                                                                                                          |
| 1486 | 4.669 | 220.0966  | Aniracetam                                                                                                                                                                                            | [M-H] <sup>+</sup>   | 220.097   | C12H13NO3    | Benzoic acids and derivatives                    | ZXNRKTGTJPIJK-UHFFFAOYSA-N   | O=C(C1=CC=C(OC)C=C1)N2C(=O)CCC2                                                                                                                                                                                                                                                                                                                                                                                                                                                                                                                                                                                                                                                                                                                                                                                                                                                                                                                                                                                                                                                                                                                                                                                                                                                                                                                                                                                                                                                                                                                                                                                                                                                                                                                                                                                                                                                                                                                                                                                                                                                                                                                                                                                                                                                                                                                                                                                                                                                                                                                                                                                                                                                                                                                                                                                                                                                                                                                                                                                                                                                                                                                                                                                                                                                                                                                                                                                                                                                                                                                                                                                                                                                                                                                                                                                                                                                                                                                                                                                                                                                                                                                                                                                                                                                                                                                                                                                                                                                                                                                                                                                                                                                                                                                                                                                                                                                                                                                                                                                                                                                                                                                                                                                                                                                                                                                                                                                                                                                                                                             |
| 1487 | 4.67  | 230.14677 | N-cyano-N'-(1,1-dimethylpropyl)-N'-3-pyridinyl-guanidine                                                                                                                                              | [M-H] <sup>-</sup>   | 230.14111 | C12H17N5     | Pyridines and derivatives                        | HKZNDVXGKQDL-UHFFFAOYSA-N    | N#N=C(NC(=O)C=NC(=O)C1)NC(C)(C)CC                                                                                                                                                                                                                                                                                                                                                                                                                                                                                                                                                                                                                                                                                                                                                                                                                                                                                                                                                                                                                                                                                                                                                                                                                                                                                                                                                                                                                                                                                                                                                                                                                                                                                                                                                                                                                                                                                                                                                                                                                                                                                                                                                                                                                                                                                                                                                                                                                                                                                                                                                                                                                                                                                                                                                                                                                                                                                                                                                                                                                                                                                                                                                                                                                                                                                                                                                                                                                                                                                                                                                                                                                                                                                                                                                                                                                                                                                                                                                                                                                                                                                                                                                                                                                                                                                                                                                                                                                                                                                                                                                                                                                                                                                                                                                                                                                                                                                                                                                                                                                                                                                                                                                                                                                                                                                                                                                                                                                                                                                                           |
| 1488 | 4.672 | 481.19406 | [3-(13-methyltetradecyl)-5-sulfoxyphenyl] hydrogen sulfate                                                                                                                                            | [M-H] <sup>+</sup>   | 481.19241 | C21H36O8S2   | Phenylsulfates                                   | NGWLEVPXPLCINC-UHFFFAOYSA-N  | O=S(=O)(O)OC1=CC(=O)S(=O)(=O)C(=O)C1)CCCCCCCCCCCC(C)C                                                                                                                                                                                                                                                                                                                                                                                                                                                                                                                                                                                                                                                                                                                                                                                                                                                                                                                                                                                                                                                                                                                                                                                                                                                                                                                                                                                                                                                                                                                                                                                                                                                                                                                                                                                                                                                                                                                                                                                                                                                                                                                                                                                                                                                                                                                                                                                                                                                                                                                                                                                                                                                                                                                                                                                                                                                                                                                                                                                                                                                                                                                                                                                                                                                                                                                                                                                                                                                                                                                                                                                                                                                                                                                                                                                                                                                                                                                                                                                                                                                                                                                                                                                                                                                                                                                                                                                                                                                                                                                                                                                                                                                                                                                                                                                                                                                                                                                                                                                                                                                                                                                                                                                                                                                                                                                                                                                                                                                                                       |
| 1489 | 4.678 | 271.18942 | (E)-2-decylpent-2-enedioic acid                                                                                                                                                                       | [M-H] <sup>+</sup>   | 271.19037 | C15H26O4     | Long-chain fatty acids                           | BWSQDEWQMUVIG-ACCUITESSA-N   | O=C(O)C(=CCC(=O)O)CCCCCCCCC                                                                                                                                                                                                                                                                                                                                                                                                                                                                                                                                                                                                                                                                                                                                                                                                                                                                                                                                                                                                                                                                                                                                                                                                                                                                                                                                                                                                                                                                                                                                                                                                                                                                                                                                                                                                                                                                                                                                                                                                                                                                                                                                                                                                                                                                                                                                                                                                                                                                                                                                                                                                                                                                                                                                                                                                                                                                                                                                                                                                                                                                                                                                                                                                                                                                                                                                                                                                                                                                                                                                                                                                                                                                                                                                                                                                                                                                                                                                                                                                                                                                                                                                                                                                                                                                                                                                                                                                                                                                                                                                                                                                                                                                                                                                                                                                                                                                                                                                                                                                                                                                                                                                                                                                                                                                                                                                                                                                                                                                                                                 |
| 1490 | 4.681 | 572.34351 | Veratrosine                                                                                                                                                                                           | [M-H] <sup>+</sup>   | 572.34998 | C33H49NO7    | Fluorenes                                        | WXQHBVNTJNGJJR-UHFFFAOYSA-N  | OC1OC(OC2OC3=CC4C5=CC=C(C(=C5OC4C3(C)C2)C(C)C)C6CC(C)C6)C(C)C(C)C1O                                                                                                                                                                                                                                                                                                                                                                                                                                                                                                                                                                                                                                                                                                                                                                                                                                                                                                                                                                                                                                                                                                                                                                                                                                                                                                                                                                                                                                                                                                                                                                                                                                                                                                                                                                                                                                                                                                                                                                                                                                                                                                                                                                                                                                                                                                                                                                                                                                                                                                                                                                                                                                                                                                                                                                                                                                                                                                                                                                                                                                                                                                                                                                                                                                                                                                                                                                                                                                                                                                                                                                                                                                                                                                                                                                                                                                                                                                                                                                                                                                                                                                                                                                                                                                                                                                                                                                                                                                                                                                                                                                                                                                                                                                                                                                                                                                                                                                                                                                                                                                                                                                                                                                                                                                                                                                                                                                                                                                                                         |
| 1491 | 4.685 | 467.28165 | 10-hydroxyusambarine                                                                                                                                                                                  | [M+2H] <sup>2+</sup> | 467.28    | C30H34N4O    | Harmala alkaloids                                | QYONROBKPAESK-YBTNASEISA-N   | OC=1C=CC=2NC3=C(C2C1)CC4C(C=C)C(OC5=6NC=7OC=CC7C6CCN5)CC34                                                                                                                                                                                                                                                                                                                                                                                                                                                                                                                                                                                                                                                                                                                                                                                                                                                                                                                                                                                                                                                                                                                                                                                                                                                                                                                                                                                                                                                                                                                                                                                                                                                                                                                                                                                                                                                                                                                                                                                                                                                                                                                                                                                                                                                                                                                                                                                                                                                                                                                                                                                                                                                                                                                                                                                                                                                                                                                                                                                                                                                                                                                                                                                                                                                                                                                                                                                                                                                                                                                                                                                                                                                                                                                                                                                                                                                                                                                                                                                                                                                                                                                                                                                                                                                                                                                                                                                                                                                                                                                                                                                                                                                                                                                                                                                                                                                                                                                                                                                                                                                                                                                                                                                                                                                                                                                                                                                                                                                                                  |
| 1492 | 4.687 | 589.30579 | 12-O-[deca-2Z,4E,6E-trienoyl]-13-isobutyroyloxy-4-deoxyphorbol                                                                                                                                        | [M-H] <sup>+</sup>   | 589.31    | C34H46O7     | Trigiane and ingenane diterpenoids               | WHPZSYIEWQPEHY-OMZKPLISA-N   | O=C(OC1C(C)C2(O)C3C=C(C(=O)C3C(=CC2)C4C1(OC(=O)C)C(C)C4(C)C(C)C(C)C=C(C=C(C=C(C=C(C=C(C=C(C=C(C=C(C=C(C=C(C=C(C=C(C=C(C=C(C=C(C=C(C=C(C=C(C=C(C=C(C=C(C=C(C=C(C=C(C=C(C=C(C=C(C=C(C=C(C=C(C=C(C=C(C=C(C=C(C=C(C=C(C=C(C=C(C=C(C=C(C=C(C=C(C=C(C=C(C=C(C=C(C=C(C=C(C=C(C=C(C=C(C=C(C=C(C=C(C=C(C=C(C=C(C=C(C=C(C=C(C=C(C=C(C=C(C=C(C=C(C=C(C=C(C=C(C=C(C=C(C=C(C=C(C=C(C=C(C=C(C=C(C=C(C=C(C=C(C=C(C=C(C=C(C=C(C=C(C=C(C=C(C=C(C=C(C=C(C=C(C=C(C=C(C=C(C=C(C=C(C=C(C=C(C=C(C=C(C=C(C=C(C=C(C=C(C=C(C=C(C=C(C=C(C=C(C=C(C=C(C=C(C=C(C=C(C=C(C=C(C=C(C=C(C=C(C=C(C=C(C=C(C=C(C=C(C=C(C=C(C=C(C=C(C=C(C=C(C=C(C=C(C=C(C=C(C=C(C=C(C=C(C=C(C=C(C=C(C=C(C=C(C=C(C=C(C=C(C=C(C=C(C=C(C=C(C=C(C=C(C=C(C=C(C=C(C=C(C=C(C=C(C=C(C=C(C=C(C=C(C=C(C=C(C=C(C=C(C=C(C=C(C=C(C=C(C=C(C=C(C=C(C=C(C=C(C=C(C=C(C=C(C=C(C=C(C=C(C=C(C=C(C=C(C=C(C=C(C=C(C=C(C=C(C=C(C=C(C=C(C=C(C=C(C=C(C=C(C=C(C=C(C=C(C=C(C=C(C=C(C=C(C=C(C=C(C=C(C=C(C=C(C=C(C=C(C=C(C=C(C=C(C=C(C=C(C=C(C=C(C=C(C=C(C=C(C=C(C=C(C=C(C=C(C=C(C=C(C=C(C=C(C=C(C=C(C=C(C=C(C=C(C=C(C=C(C=C(C=C(C=C(C=C(C=C(C=C(C=C(C=C(C=C(C=C(C=C(C=C(C=C(C=C(C=C(C=C(C=C(C=C(C=C(C=C(C=C(C=C(C=C(C=C(C=C(C=C(C=C(C=C(C=C(C=C(C=C(C=C(C=C(C=C(C=C(C=C(C=C(C=C(C=C(C=C(C=C(C=C(C=C(C=C(C=C(C=C(C=C(C=C(C=C(C=C(C=C(C=C(C=C(C=C(C=C(C=C(C=C(C=C(C=C(C=C(C=C(C=C(C=C(C=C(C=C(C=C(C=C(C=C(C=C(C=C(C=C(C=C(C=C(C=C(C=C(C=C(C=C(C=C(C=C(C=C(C=C(C=C(C=C(C=C(C=C(C=C(C=C(C=C(C=C(C=C(C=C(C=C(C=C(C=C(C=C(C=C(C=C(C=C(C=C(C=C(C=C(C=C(C=C(C=C(C=C(C=C(C=C(C=C(C=C(C=C(C=C(C=C(C=C(C=C(C=C(C=C(C=C(C=C(C=C(C=C(C=C(C=C(C=C(C=C(C=C(C=C(C=C(C=C(C=C(C=C(C=C(C=C(C=C(C=C(C=C(C=C(C=C(C=C(C=C(C=C(C=C(C=C(C=C(C=C(C=C(C=C(C=C(C=C(C=C(C=C(C=C(C=C(C=C(C=C(C=C(C=C(C=C(C=C(C=C(C=C(C=C(C=C(C=C(C=C(C=C(C=C(C=C(C=C(C=C(C=C(C=C(C=C(C=C(C=C(C=C(C=C(C=C(C=C(C=C(C=C(C=C(C=C(C=C(C=C(C=C(C=C(C=C(C=C(C=C(C=C(C=C(C=C(C=C(C=C(C=C(C=C(C=C(C=C(C=C(C=C(C=C(C=C(C=C(C=C(C=C(C=C(C=C(C=C(C=C(C=C(C=C(C=C(C=C(C=C(C=C(C=C(C=C(C=C(C=C(C=C(C=C(C=C(C=C(C=C(C=C(C=C(C=C(C=C(C=C(C=C(C=C(C=C(C=C(C=C(C=C(C=C(C=C(C=C(C=C(C=C(C=C(C=C(C=C(C=C(C=C(C=C(C=C(C=C(C=C(C=C(C=C(C=C(C=C(C=C(C=C(C=C(C=C(C=C(C=C(C=C(C=C(C=C(C=C(C=C(C=C(C=C(C=C(C=C(C=C(C=C(C=C(C=C(C=C(C=C(C=C(C=C(C=C(C=C(C=C(C=C(C=C(C=C(C=C(C=C(C=C(C=C(C=C(C=C(C=C(C=C(C=C(C=C(C=C(C=C(C=C(C=C(C=C(C=C(C=C(C=C(C=C(C=C(C=C(C=C(C=C(C=C(C=C(C=C(C=C(C=C(C=C(C=C(C=C(C=C(C=C(C=C(C=C(C=C(C=C(C=C(C=C(C=C(C=C(C=C(C=C(C=C(C=C(C=C(C=C(C=C(C=C(C=C(C=C(C=C(C=C(C=C(C=C(C=C(C=C(C=C(C=C(C=C(C=C(C=C(C=C(C=C(C=C(C=C(C=C(C=C(C=C(C=C(C=C(C=C(C=C(C=C(C=C(C=C(C=C(C=C(C=C(C=C(C=C(C=C(C=C(C=C(C=C(C=C(C=C(C=C(C=C(C=C(C=C(C=C(C=C(C=C(C=C(C=C(C=C(C=C(C=C(C=C(C=C(C=C(C=C(C=C(C=C(C=C(C=C(C=C(C=C(C=C(C=C(C=C(C=C(C=C(C=C(C=C(C=C(C=C(C=C(C=C(C=C(C=C(C=C(C=C(C=C(C=C(C=C(C=C(C=C(C=C(C=C(C=C(C=C(C=C(C=C(C=C(C=C(C=C(C=C(C=C(C=C(C=C(C=C(C=C(C=C(C=C(C=C(C=C(C=C(C=C(C=C(C=C(C=C(C=C(C=C(C=C(C=C(C=C(C=C(C=C(C=C(C=C(C=C(C=C(C=C(C=C(C=C(C=C(C=C(C=C(C=C(C=C(C=C(C=C(C=C(C=C(C=C(C=C(C=C(C=C(C=C(C=C(C=C(C=C(C=C(C=C(C=C(C=C(C=C(C=C(C=C(C=C(C=C(C=C(C=C(C=C(C=C(C=C(C=C(C=C(C=C(C=C(C=C(C=C(C=C(C=C(C=C(C=C(C=C(C=C(C=C(C=C(C=C(C=C(C=C(C=C(C=C(C=C(C=C(C=C(C=C(C=C(C=C(C=C(C=C(C=C(C=C(C=C(C=C(C=C(C=C(C=C(C=C(C=C(C=C(C=C(C=C(C=C(C=C(C=C(C=C(C=C(C=C(C=C(C=C(C=C(C=C(C=C(C=C(C=C(C=C(C=C(C=C(C=C(C=C(C=C(C=C(C=C(C=C(C=C(C=C(C=C(C=C(C=C(C=C(C=C(C=C(C=C(C=C(C=C(C=C(C=C(C=C(C=C(C=C(C=C(C=C(C=C(C=C(C=C(C=C(C=C(C=C(C=C(C=C(C=C(C=C(C=C(C=C(C=C(C=C(C=C(C=C(C=C(C=C(C=C(C=C(C=C(C=C(C=C(C=C(C=C(C=C(C=C(C=C(C=C(C=C(C=C(C=C(C=C(C=C(C=C(C=C(C=C(C=C(C=C(C=C(C=C(C=C(C=C(C=C(C=C(C=C(C=C(C=C(C=C(C=C(C=C(C=C(C=C(C=C(C=C(C=C(C=C(C=C(C=C(C=C(C=C(C=C(C=C(C=C(C=C(C=C(C=C(C=C(C=C(C=C(C=C(C=C(C=C(C=C(C=C(C=C(C=C(C=C(C=C(C=C(C=C(C=C(C=C(C=C(C=C(C=C(C=C(C=C(C=C(C=C(C=C(C=C(C=C(C=C(C=C(C=C(C=C(C=C(C=C(C=C(C=C(C=C(C=C(C=C(C=C(C=C(C=C(C=C(C=C(C=C(C=C(C=C(C=C(C=C(C=C(C=C(C=C(C=C(C=C(C=C(C=C(C=C(C=C(C=C(C=C(C=C(C=C(C=C(C=C(C=C(C=C(C=C(C=C(C=C(C=C(C=C(C=C(C=C(C=C(C=C(C=C(C=C(C=C(C=C(C=C(C=C(C=C(C=C(C=C(C=C(C=C(C=C(C=C(C=C(C=C(C=C(C=C(C=C(C=C(C=C(C=C(C=C(C=C(C=C(C=C(C=C(C=C(C=C(C=C(C=C(C=C(C=C(C=C(C=C(C=C(C=C(C=C(C=C(C=C(C=C(C=C(C=C(C=C(C=C(C=C(C=C(C=C(C=C(C=C(C=C(C=C(C=C(C=C(C=C(C=C(C=C(C=C(C=C(C=C(C=C(C=C(C=C(C=C(C=C(C=C(C=C(C=C(C=C(C=C(C=C(C=C(C=C(C=C(C=C(C=C(C=C(C=C(C=C(C=C(C=C(C=C(C=C(C=C(C=C(C=C(C=C(C=C(C=C(C=C(C=C(C=C(C=C(C=C(C=C(C=C(C=C(C=C(C=C(C=C(C=C(C=C(C=C(C=C(C=C(C=C(C=C(C=C(C=C(C=C(C=C(C=C(C=C(C=C(C=C(C=C(C=C(C=C(C=C(C=C(C=C(C=C(C=C(C=C(C=C(C=C(C=C(C=C(C=C(C=C(C=C(C=C(C=C(C=C(C=C(C=C(C=C(C=C(C=C(C=C(C=C(C=C(C=C(C=C(C=C(C=C(C=C(C=C(C=C(C=C(C=C(C=C(C=C(C=C(C=C(C=C(C=C(C=C(C=C(C=C(C=C(C=C(C=C(C=C(C=C(C=C(C=C(C=C(C=C(C=C(C=C(C=C(C=C(C=C(C=C(C=C(C=C(C=C(C=C(C=C(C=C(C=C(C=C(C=C(C=C(C=C(C=C(C=C(C=C(C=C(C=C(C=C(C=C(C=C(C=C(C=C(C=C(C=C(C=C(C=C(C=C(C=C(C=C(C=C(C=C(C=C(C=C(C=C(C=C(C=C(C=C(C=C(C=C(C=C(C=C(C=C(C=C(C=C(C=C(C=C(C=C(C=C(C=C(C=C(C=C(C=C(C=C(C=C(C=C(C=C(C=C(C=C(C=C(C=C(C=C(C=C(C=C(C=C(C=C(C=C(C=C(C=C(C=C(C=C(C=C(C=C(C=C(C=C(C=C(C=C(C=C(C=C(C=C(C=C(C=C(C=C(C=C(C=C(C=C(C=C(C=C(C=C(C=C(C=C(C=C(C=C(C=C(C=C(C=C(C=C(C=C(C=C(C=C(C=C(C=C(C=C(C=C(C=C(C=C(C=C(C=C(C=C(C=C(C=C(C=C(C=C(C=C(C=C(C=C(C=C(C=C(C=C(C=C(C=C(C=C(C=C(C=C(C=C(C=C(C=C(C=C(C=C(C=C(C=C(C=C(C=C(C=C(C=C(C=C(C=C(C=C(C=C(C=C(C=C(C=C(C=C(C=C(C=C(C=C(C=C(C=C(C=C(C=C(C=C(C=C(C=C(C=C(C=C(C=C(C=C(C=C(C=C(C=C(C=C(C=C(C=C(C=C(C=C(C=C(C=C(C=C(C=C(C=C(C=C(C=C(C=C(C=C(C=C(C=C(C=C(C=C(C=C(C=C(C=C(C=C(C=C(C=C(C=C(C=C(C=C(C=C(C=C(C=C(C=C(C=C(C=C(C=C(C=C(C=C(C=C(C=C(C=C(C=C(C=C(C=C(C=C(C=C(C=C(C=C(C=C(C=C(C=C(C=C(C |

|      |        |            |                                                                                                                                                                                                                                                    |                      |            |               |                                                  |                              |                                                                                                                                                   |
|------|--------|------------|----------------------------------------------------------------------------------------------------------------------------------------------------------------------------------------------------------------------------------------------------|----------------------|------------|---------------|--------------------------------------------------|------------------------------|---------------------------------------------------------------------------------------------------------------------------------------------------|
| 1504 | 4. 736 | 250. 10771 | Dimethachlor OXA                                                                                                                                                                                                                                   | [M-H] <sup>-</sup>   | 250. 10847 | C13H17N04     | Alpha amino acids and derivatives                | MHGMSAFFNAKIRZ-UHFFFAOYSA-N  | COCCN(C(=O)C(=O)=O)C1=C(C)C=CC=C1C                                                                                                                |
| 1505 | 4. 741 | 308. 11472 | CP_M308a                                                                                                                                                                                                                                           | [M+H] <sup>+</sup>   | 308. 11603 | C15H18ClN3O2  | Chlorobenzenes                                   | IVFRBVSPOAYOOK-UHFFFAOYNA-N  | C1C1C1(CO)C(CN2C=NC=N2)(C3=CC=C(C(=C3)C1)O                                                                                                        |
| 1506 | 4. 741 | 326. 12619 | Monocrotaline                                                                                                                                                                                                                                      | [M+H] <sup>+</sup>   | 326. 12665 | C16H23N06     | Pyrrolizines                                     | QVCMHGNNRFMAD-XFGHUUIASA-N   | O=C1OC2CNC3CC=C(COC(=O)C(=O)C(=O)C1C)C32                                                                                                          |
| 1507 | 4. 741 | 182. 08051 | Tyr                                                                                                                                                                                                                                                | [M+H] <sup>+</sup>   | 182. 08118 | C9H11N03      | Tyrosine and derivatives                         | OUYCCASQSFEME-QMMGPOBSA-N    | N[C=H](CC1=CC=C(C(=O)C=C1)C(=O)=O                                                                                                                 |
| 1508 | 4. 744 | 199. 086   | Harmol Hydrochloride                                                                                                                                                                                                                               | [M+H] <sup>+</sup>   | 199. 08658 | C12H10N02     | Harmala alkaloids                                | LBBJNGFCXDQYMQ-UHFFFAOYSA-N  | O=C1C=CC=2C(=C1)NC=3C2C=CN3C                                                                                                                      |
| 1509 | 4. 775 | 176. 03455 | FORMYL-L-METHIONYL PEPTIDE                                                                                                                                                                                                                         | [M-H] <sup>-</sup>   | 176. 03799 | C6H11N03S     | Methionine and derivatives                       | PYUSHNNKPOHWEZ-UHFFFAOYSA-N  | =O-CNC(C(=O)O)CCSC                                                                                                                                |
| 1510 | 4. 784 | 369. 09335 | psulowin                                                                                                                                                                                                                                           | [M-H] <sup>-</sup>   | 369. 09796 | C20H1807      | Furanoid lignans                                 | CAQZFLPHBKTRT-WMISUXOKSA-N   | OC12COC(C3=CC=C4OCOC4=C3)C2COC1C5=CC=C6OCOC6=C5                                                                                                   |
| 1511 | 4. 787 | 291. 12567 | curvularin                                                                                                                                                                                                                                         | [M-H] <sup>-</sup>   | 291. 12378 | C16H2005      | Macrolides and analogues                         | VDUTGYAPXSXCJFC-UHFFFAOYSA-N | O=C1OC(C)CCCCC(=O)C=2C(=O)=CC(O)=CC2C1                                                                                                            |
| 1512 | 4. 792 | 308. 11157 | altenuin                                                                                                                                                                                                                                           | [M+H] <sup>+</sup>   | 308. 11285 | C15H1406      | Biphenyls and derivatives                        | ADPBTBPP11KLEH-UHFFFAOYSA-N  | O=C(O)C1=C(C(=O)C=C(O)C=C1C=2C=C(C(=O)C(=O)=CC2C                                                                                                  |
| 1513 | 4. 794 | 437. 16907 | Picropodophyllin                                                                                                                                                                                                                                   | [M+H] <sup>+</sup>   | 437. 16586 | C22H2208      | Podophyllotoxins                                 | YJGVMLPVUAXIQN-HAEOHJBNSA-N  | O=C1OC2C(=O)C3=CC=4OCOC4=C3C(C5=CC(OC)=C(C(=O)C(OC)=C5)C12                                                                                        |
| 1514 | 4. 804 | 326. 09903 | Tumonoic acid E                                                                                                                                                                                                                                    | [M+H] <sup>+</sup>   | 326. 10001 | C18H31N04     | Proline and derivatives                          | UUFOMZNGYHUJH-XTVPCCRVSA-N   | O=C(O)C1N(C(=O)C(C(=O)C(=O)C(CCC(C)CCC(C)CCC1                                                                                                     |
| 1515 | 4. 835 | 305. 09125 | Oxypeucedanin hydrate                                                                                                                                                                                                                              | [M+H] <sup>+</sup>   | 305. 10001 | C16H1606      | Psoralens                                        | PEFPWDOPJISUOK-CYBMJFWSA-N   | O=C1OC=2C=C3OC=CC3=C(OC(C)C(=O)C(C)C)C2C=C1                                                                                                       |
| 1516 | 4. 844 | 208. 13234 | Benzoylcholine                                                                                                                                                                                                                                     | [M+H] <sup>+</sup>   | 208. 13266 | C12H18N02     | Benzoic acid esters                              | HOPVGFKDVOOCHD-UHFFFAOYSA-N  | C[N+](C)(C)CCOC(=O)C1=CC=CC=C1                                                                                                                    |
| 1517 | 4. 847 | 281. 09552 | culpin                                                                                                                                                                                                                                             | [M+2H] <sup>2+</sup> | 281. 09384 | C16H1802      | Prenylated hydroquinones                         | QMWWKFPZKRYCUMA-UHFFFAOYSA-N | OC1=CC(=C(C(=O)C=C1C#CC(=C(C)C)CC=C(C)C                                                                                                           |
| 1518 | 4. 848 | 283. 12842 | biochanin A                                                                                                                                                                                                                                        | [M-H] <sup>-</sup>   | 283. 13037 | C16H1205      | 4'-O-methylisoflavones                           | WUADCCVRTIWANL-UHFFFAOYSA-N  | O=C1C(=COC=2C=C(C(=O)C(C(=O)C12)C=3C=CC(OC)=CC3                                                                                                   |
| 1519 | 4. 852 | 621. 18243 | 5-[4,5-dihydroxy-6-(hydroxymethyl)-3-(3,4,5-trihydroxyoxan-2-yl)oxyoxan-2-yl]oxy-7,8-dimethoxy-3-(4-methoxyphenoxy)chromen-4-one                                                                                                                   | [M-H] <sup>-</sup>   | 621. 1825  | C29H34015     | Isoflavonoid O-glycosides                        | NGUSMSQYMPBGF-UHFFFAOYSA-N   | O=C1C(=COC=2C(OC)=C(C)C=C(C(OC3OC(CO)C(=O)C3OC4OC(C(=O)C4O)C12)C=5C=CC(=O)C=C5                                                                    |
| 1520 | 4. 853 | 539. 22491 | methyl (1S,2R,4R,8R,9S,10R,13R,15R)-2-(acetoxyl)-13-(furan-3-yl)-9-(2-methoxy-2-oxoethyl)-4,8,10,12-tetramethyl-7-oxo-16-methoxy-2-oxoethyl)-3,4,5-tri                                                                                             | [M-H] <sup>-</sup>   | 539. 22864 | C30H3609      | Limonoids                                        | NHOIBRJQOAYQJTR-WILUJPLZSA-N | O=C(OC1C2OC3C(=C(C)C(C4=OC=C4)C3)C2(C)C(CC(=O)OC)C5(C(=O)C6C7C(C(=O)C7)C6)C1C15)C1C                                                               |
| 1521 | 4. 854 | 543. 21814 | methyl 3-(1-(2-(1H-indol-3-yl)ethyl)-2-hydroxy-6-methyl-4-oxo-1,4-dihydroxyridin-3-yl)-3-(3,4,5-trimethoxyphenoxy)propanoate                                                                                                                       | [M+H] <sup>+</sup>   | 543. 21002 | C29H32N207    | 3-alkylindoles                                   | OUBFEEIFMSTDPQ-UHFFFAOYSA-N  | O=C1C=C(C(N(C(=O)=C1C(C2=CC(OC)=C(C(=O)C(OC)=C2)CC(=O)OC)CC(C3=CC=C4C=C(C=C4)C3                                                                   |
| 1522 | 4. 854 | 664. 09021 | NICOTINAMIDE HYPOXANTHINE DINUCLEOTIDE                                                                                                                                                                                                             | [M-H] <sup>-</sup>   | 664. 09302 | C21H26N6O15P2 | (5'->5')-dinucleotides                           | DGVSIBCYUVRNA-UHFFFAOYSA-N   | O=C1N=CN2C=C1N=CN2C3OC(COP(=O)(O)OP(=O)([10-])OC4OC(C[N+]=5C=C(C=C5)C(=O)N(C(=O)C4O)C(=O)C3O                                                      |
| 1523 | 4. 858 | 186. 11198 | 3-(2-amino-2-oxoethyl)-5-methyl-hexanoic acid                                                                                                                                                                                                      | [M-H] <sup>-</sup>   | 186. 11099 | C9H17N03      | Medium-chain fatty acids                         | NPDKTSLVWGFPQG-UHFFFAOYSA-N  | O=C(O)CC(CC(=N)O)CC(C)C                                                                                                                           |
| 1524 | 4. 864 | 280. 09427 | 9-Methoxy-2,2-dimethyl-2,6-dihydro-pyran[3,2-c]quinolin-5-one                                                                                                                                                                                      | [M+2H] <sup>2+</sup> | 280. 09439 | C15H15N03     | Pyraquinolines                                   | IXRKGKGFPFCIR-UHFFFAOYSA-N   | OC1=NC=2C=CC(OC)=CC2C=3OC(C=CC13)C(C)C                                                                                                            |
| 1525 | 4. 867 | 178. 04965 | Alliin                                                                                                                                                                                                                                             | [M+H] <sup>+</sup>   | 178. 05    | C6H11N03S     | L-alpha-amino acids                              | XUHLIQGRKURPH-JDLXGLENSA-N   | O=C(O)C(N)CS(=O)CC=C                                                                                                                              |
| 1526 | 4. 869 | 300. 19412 | (5S)-5-hydroxy-1,7-diphenylheptan-3-one                                                                                                                                                                                                            | [M+H] <sup>+</sup>   | 300. 1958  | C19H2202      | Linear diarylheptanoids                          | CCKNTMMNRPJQHV-SFHVURJKSA-N  | O=C(CCC(=C=CC=CC1)CC(O)CCC=2C=OC=CC2                                                                                                              |
| 1527 | 4. 871 | 362. 18076 | 2-[1-hydroxy-1-(4-methoxyphenyl)propan-2-yl]oxy-6-(hydroxymethyl)oxane-3,4,5-triol                                                                                                                                                                 | [M+H] <sup>+</sup>   | 362. 18094 | C16H2408      | O-glycosyl compounds                             | JYWSARFDLXXOHT-UHFFFAOYSA-N  | OCOC1OC(C(C)C(=O)C2=CC=C(OC)C=C2)C(C(=O)C(=O)C1O                                                                                                  |
| 1528 | 4. 873 | 285. 13025 | 3-Hexen-1-ol O-b-D-glucopyranoside                                                                                                                                                                                                                 | [M+H] <sup>+</sup>   | 285. 13    | C12H2206      | Fatty acyl glycosides of mono- and disaccharides | OZ1PFYKAOOVJEJ-ODUUMNUISA-N  | OCOC1OC(CCCC=CC)C(C)C(O)C1O                                                                                                                       |
| 1529 | 4. 875 | 479. 18799 | 4-(2-Nitroethyl)phenyl 6-O-?-D-xylopyranosyl-?-D-glucopyranoside                                                                                                                                                                                   | [M+H] <sup>+</sup>   | 479. 18713 | C19H27N012    | Phenolic glycosides                              | ZHVLKFAODFQST-BMWMOQNNSA-N   | O=N(=O)CCC1=CC=C(C(OC2OC(COC3OC(C(=O)C3O)C(=O)C(=O)C2O)C=C1                                                                                       |
| 1530 | 4. 894 | 423. 12613 | 2-[[1-(2R,3S)-2-(3,4-dihydroxyphenyl)-3,5-dihydroxy-3,4-dihydro-2H-chromen-7-yl]oxy]oxane-3,4,5-triol                                                                                                                                              | [M+H] <sup>+</sup>   | 423. 1264  | C20H22010     | Flavonoid-7-O-glycosides                         | UQKKDJWFQZJLPT-PTYVBHFSNA-N  | OC1=CC=C(C=C1O)C2OC3=CC(OC4OC(CO)C(=O)C4O)=CC(O)=C3CC2O                                                                                           |
| 1531 | 4. 905 | 430. 30078 | PF-1052_130138                                                                                                                                                                                                                                     | [M+H] <sup>+</sup>   | 430. 29599 | C26H39N04     | N-alkylpyrrolidines                              | NPWKEUKXVOMELT-LXVKXUELSA-N  | O=C1OC(C(=O)C(N1C)C(C)C(C)=O)C2C(C=CC3OC(C)CC(C)C32)C4(OC4)C                                                                                      |
| 1532 | 4. 912 | 383. 13275 | Ochrephilon                                                                                                                                                                                                                                        | [M+H] <sup>+</sup>   | 383. 13297 | C23H2605      | Cyclohexenones                                   | GAIVGINVGXHEIA-ZAAJWPAISA-N  | O=C1OC2(C(=O)C=C3C=C(OC=C3C2C1C(=O)C)C=C(=CC(C)CC)C                                                                                               |
| 1533 | 4. 917 | 428. 21677 | Pesticide2_Benfuracarb_C20H30N2O5S_Oncol                                                                                                                                                                                                           | [M+H] <sup>+</sup>   | 428. 22198 | C20H30N2O5S   | Coumarans                                        | FYZBOYWSHKHDMT-UHFFFAOYSA-N  | O=C(OC1=CC=CC2=C1OC(C)C2)N(SN(CCC(=O)OCC)C(C)C)C                                                                                                  |
| 1534 | 4. 926 | 197. 11649 | Lolilide                                                                                                                                                                                                                                           | [M+H] <sup>+</sup>   | 197. 117   | C11H1603      | Benzofurans                                      | XEVQXKKKAVVSMW-UHFFFAOYSA-N  | O=C1OC2(C(=C1)C(C)C)CC(O)C2)C                                                                                                                     |
| 1535 | 4. 928 | 193. 04929 | Monoethyl phthalate                                                                                                                                                                                                                                | [M-H] <sup>-</sup>   | 193. 05063 | C10H1004      | Benzoic acid esters                              | YVWHKOHZJFMIE-UHFFFAOYSA-N   | CCOC(C1=CC=CC=C1C(=O)O)=O                                                                                                                         |
| 1536 | 4. 932 | 631. 17334 | 4-(3-Oxobutyl)phenyl 6-O-[(2E)-3-phenyl-2-propenoyl]-2-O-(3,4,5-trihydroxybenzoyl)-beta-D-glucopyranoside                                                                                                                                          | [M+H] <sup>+</sup>   | 631. 17999 | C32H32012     | Phenolic glycosides                              | AHLBWJHZDLMJQJ-SIJHJTGPPSA-N | O=C(OCOC1OC(C2=CC=C(C=C2)CCC(=O)C)C(OC(=O)C(C3=CC(O)=C(O)C(=O)C3)C(C)C1O)C(=O)C(C1O)C(=O)C(=O)C(=O)C(C4                                           |
| 1537 | 4. 94  | 331. 1752  | (3R,4S,5S,6R)-2-(6-hydroxy-2,6-dimethylocta-2,7-dienoxy)-6-(hydroxymethyl)oxane-3,4,5-triol                                                                                                                                                        | [M-H] <sup>-</sup>   | 331. 17621 | C16H2807      | Fatty acyl glycosides of mono- and disaccharides | WEHZNHJZBEGME-SPGNZJCFSA-N   | OCOC1OC(CCCC(=O)C(C(=O)C)C(C(=O)C)C1O                                                                                                             |
| 1538 | 4. 943 | 451. 22998 | [4,8-dihydroxy-3-(3-methoxy-3-oxoprop-1-en-2-yl)-8a-methyl-5-oxo-1,2,3,4,4a,6,7,8-octahydronaphthalen-2-yl]-3,4-dihydroxy-2-(4aS,6aR,6bR,10S,12aR)-1,2,6b,9,9,12a-hexamethyl-10-[(2R,3R,4S,5S,6R)-3,4,5-trihydroxy-6-(hydroxymethyl)oxan-2-yl]oxy- | [M+H] <sup>+</sup>   | 451. 2262  | C20H2809      | Beta hydroxy acids and derivatives               | NOGWMYITAXOCY-UHFFFAOYSA-N   | O=C(OC(C(=O)C1C(C(=O)C2C(C(=O)C2)C(C1OC(=O)C(=O)C(=O)C(=O)C(=O)C12C(=CC3C4(C)CCC(OC5OC(C(=O)C(=O)C5O)C(C)C(C)C4CCC3(C)C6C(C)C(C)C7C6(C=C(=O)O)CC2 |
| 1539 | 4. 944 | 666. 42291 | (4aS,6aR,6bR,10S,12aR)-1,2,6b,9,9,12a-hexamethyl-10-[(2R,3R,4S,5S,6R)-3,4,5-trihydroxy-6-(hydroxymethyl)oxan-2-yl]oxy-                                                                                                                             | [M+H] <sup>+</sup>   | 666. 42114 | C36H56010     | Triterpene saponins                              | AXNXSFBKZQIMPF-RIBCLQTCSA-N  | O=C(OC)CC1C(C(=O)C(=O)CC2OC34C(=O)C(CCC4(C)C(OC(=O)C3)C5=O)C=C5)C21C                                                                              |
| 1540 | 4. 945 | 471. 24402 | 3Alpha-Hydroxy-3-Deoxyangolensic Acid Methyl Ester                                                                                                                                                                                                 | [M-H] <sup>-</sup>   | 471. 24536 | C27H3607      | Delta valerolactones                             | QFRZVNPYNYLAN-UOICJKMOSAN    | O=C(O)CCC(NC(=O)C1=CC=C(C=C1)C(C#CC)CC=2N=C3C(=N)C=N(C(=O)C1)C(=O)O                                                                               |
| 1541 | 4. 945 | 478. 18442 | Pralatrexate (Folotyln)                                                                                                                                                                                                                            | [M+H] <sup>+</sup>   | 478. 18301 | C23H23N705    | Glutamic acid and derivatives                    | QFSBUKJUDHAQEA-WMCAAGNNSA-N  | O=C(OC)C1=C(NC(=C(C(=O)OC)C1C=2C=CC=CC2N(=O)=O)C)C                                                                                                |
| 1542 | 4. 946 | 347. 12262 | Nifedipine                                                                                                                                                                                                                                         | [M+H] <sup>+</sup>   | 347. 12375 | C17H18N206    | Dihydropyridinecarboxylic acids and derivatives  | HYTMSNHJQBLINT-UHFFFAOYSA-N  | O=C(OC)C1=C(NC(=C(C(=O)OC)C1C=2C=CC=CC2N(=O)=O)C)C                                                                                                |
| 1543 | 4. 952 | 148. 03983 | 4-Hydroxymandelonitrile                                                                                                                                                                                                                            | [M-H] <sup>-</sup>   | 148. 04041 | C8H7N02       | 1-hydroxy-2-unsubstituted benzeneids             | HOOPXDSCKBLFG-UHFFFAOYNA-N   | N#CC(O)C1=CC=C(C)C=C1                                                                                                                             |
| 1544 | 4. 97  | 231. 1232  | Melatonin                                                                                                                                                                                                                                          | [M-H] <sup>-</sup>   | 231. 12207 | C13H16N202    | 3-alkylindoles                                   | DRLFMBDRBRZALE-UHFFFAOYSA-N  | OC(=NCCC1=CNC=2C=CC(OC)=CC21)C                                                                                                                    |
| 1545 | 4. 974 | 601. 3418  | Desferrioxamine E                                                                                                                                                                                                                                  | [M+H] <sup>+</sup>   | 601. 34198 | C27H48N609    | Macrolactams                                     | NHKCCADZLTPPO-UHFFFAOYSA-N   | O=C1N(O)CCCCN=C(C)CCC(=O)N(O)CCCCCN=C(C)CCC(=O)N(O)CC(CCCN=C(O)CC1                                                                                |
| 1546 | 4. 98  | 327. 04868 | Acid Orange 7 (free acid)                                                                                                                                                                                                                          | [M-H] <sup>-</sup>   | 327. 04449 | C16H12N204S   | Naphthols and derivatives                        | RDUJRVXKAIYTDH-UHFFFAOYSA-N  | C1=CC=C2C(=C1)C=CC(=C2N3CC=C(C(=C3)S(O)(=O)=O                                                                                                     |

|      |        |            |                                                                                                                                                           |                      |            |             |                                                                     |                             |                                                                    |
|------|--------|------------|-----------------------------------------------------------------------------------------------------------------------------------------------------------|----------------------|------------|-------------|---------------------------------------------------------------------|-----------------------------|--------------------------------------------------------------------|
| 1547 | 4. 98  | 361. 1012  | Demethoxycurcumin                                                                                                                                         | [M+H] <sup>+</sup>   | 361. 10001 | C20H18O5    | Curcuminoids                                                        | HJTJVQHVGMGKONQ-LUZRFALSA-N | O=C(C=CC1=CC=C(C)C)CC(=O)C=CC2=CC=C(C)C(OC)=C2                     |
| 1548 | 4. 985 | 262. 09906 | (E)-3-(3-chlorobut-2-en-1-yl)-2, 8-dimethylquinolin-4-ol                                                                                                  | [M+H] <sup>+</sup>   | 262. 10001 | C15H16ClN0  | Hydroquinolones                                                     | YRXDKQKQWMHRSY-JXMRQGBWSA-N | C1C(=CCC1=C(C)C=2C=CC=C(C2N=C1C)C)C                                |
| 1549 | 4. 993 | 268. 16434 | Azacyclonol                                                                                                                                               | [M+H] <sup>+</sup>   | 268. 17001 | C18H21N0    | Diphenylmethanes                                                    | ZMISODWVFHHNR-UHFFFAOYSA-N  | OC(=C1C=CC=CC1)C(=C2C=CC=C2)C3CNC3                                 |
| 1550 | 4. 994 | 440. 20276 | Protostemonine                                                                                                                                            | [M+H] <sup>+</sup>   | 440. 20001 | C23H31N06   | Stemamide-type alkaloids                                            | JDGNFRYDHRXNL-ROHJGGRPSA-N  | O=C1OC(C(OC)=C1C)=C2OC3CCN4C(CCC4C3C2)C5OC(=O)C(C)C5               |
| 1551 | 4. 999 | 150. 09082 | 2'-Methylacetanilide                                                                                                                                      | [M+H] <sup>+</sup>   | 150. 09134 | C9H11N0     | Acetanilides                                                        | BPEXTIMJLDWTL-UHFFFAOYSA-N  | CC1=CC=CC=C1N=C(C)O                                                |
| 1552 | 5. 003 | 423. 29526 | licoricidin                                                                                                                                               | [M-H] <sup>-</sup>   | 423. 2905  | C26H32O5    | 5-O-methylated isoflavonoids                                        | GBRZTJUCDFSHM-KRWQZBQSA-N   | OC1=CC=C(C(OC)=C1OC=C(C)C)C2OC3=CC(=O)C(C(OC)=C3C2)CC=C(C)C        |
| 1553 | 5. 015 | 357. 16394 | Hycanthone                                                                                                                                                | [M+H] <sup>+</sup>   | 357. 16312 | C20H24N2O2S | Thiochromenes                                                       | MFZWMTSUNWVBU-UHFFFAOYSA-N  | CCN(CC)CCN1=C2C(=O)C3=CC=CC=C3SC2=C(C)C=C1                         |
| 1554 | 5. 017 | 146. 05962 | Indole-3-carboxyaldehyde                                                                                                                                  | [M+H] <sup>+</sup>   | 146. 06004 | C9H7N0      | Indoles                                                             | OLNJUISKUQNTW-UHFFFAOYSA-N  | O=CC1=CC2=CC=CC=C12                                                |
| 1555 | 5. 017 | 524. 26886 | sodium (2R)-2'-((2R, 5S, 6R)-6'-((3E, 5E)-6-((3aR, 4S, 7aS)-4-(1H-pyrrole-2-carbonyl)-2, 3, 3a, 4, 5, 7a-hexahydro-1H-inden-5-yl)hexa-3, 5-dien-3-yl)-5-  | [M+H] <sup>+</sup>   | 524. 27002 | C30H40NNaO4 | Aryl alkyl ketones                                                  | BPSPGNVGAIGAXI-AREVZEEPSA-M | [Na <sup>+</sup> ]. O=C([O-]                                       |
| 1556 | 5. 018 | 361. 20032 | Cortisone                                                                                                                                                 | [M+H] <sup>+</sup>   | 361. 20093 | C21H28O5    | 21-hydroxysteroids                                                  | MFYSYFVPBJMBGN-ZPOLXVRWSA-N | 1)C(C)C1OC(C(=CC=CC2=CC3CCC3C2)C(=O)C4=CC(=C4)C)C(C                |
| 1557 | 5. 021 | 407. 20593 | [6, 10a-dihydroxy-4-(hydroxymethyl)-4, 7, 11b-trimethyl-9-oxo-1, 2, 3, 4a, 5, 6, 6a, 7, 11, 11a-decahydronaphtho[2, 1-f][1]benzofuran-5-yl]               | [M-H] <sup>-</sup>   | 407. 20752 | C22H32O7    | Naphthofurans                                                       | GWEGFCVAPNYPY-UHFFFAOYSA-N  | O=C1OC2(O)C=C1)C(C)C3C(O)C(OC(=O)C)C4C(C)(CO)CCCC4(C)C3C2          |
| 1558 | 5. 021 | 379. 14713 | Glyasperin C                                                                                                                                              | [M+H] <sup>+</sup>   | 379. 14999 | C21H24O5    | 5-O-methylated isoflavonoids                                        | RCZMWKVBFOCEE-UHFFFAOYSA-N  | OC1=CC=C(C(OC)=C1)C2COC3=CC(=O)C(C(OC)=C3C2)CC=C(C)C               |
| 1559 | 5. 023 | 609. 33606 | Reserpine                                                                                                                                                 | [M+H] <sup>+</sup>   | 609. 33337 | C33H40N2O9  | Yohimbin alkaloids                                                  | QEVHRUUCGRFIF-MDEJGZSSA-N   | O=C(OC1CC2CN3CC=CC=CC(OC)=C5NC4C3CC2C(C(=O)OC)C1O                  |
| 1560 | 5. 028 | 361. 13901 | Nitrendipine                                                                                                                                              | [M+H] <sup>+</sup>   | 361. 13901 | C18H20N2O6  | Dihydropyridinecarboxylic acids and derivatives                     | PVHUJELLJLJGLN-UHFFFAOYSA-N | C)C6=CC(OC)=C(OC)C(OC)=C6                                          |
| 1561 | 5. 03  | 144. 04489 | 4-Hydroxyquinoline                                                                                                                                        | [M-H] <sup>-</sup>   | 144. 04549 | C9H7N0      | Hydroquinolones                                                     | PMZDQRJGMBQBF-UHFFFAOYSA-N  | O=C(OC)C1=C(NC(=C(C(=O)OC)C1C=2C=CC=C2)[N+](=O)[O-])C(C            |
| 1562 | 5. 031 | 206. 11729 | Dehydrosalsolidine                                                                                                                                        | [M+H] <sup>+</sup>   | 206. 11755 | C12H15N02   | Others                                                              | VASUQTGAZAPKFK-UHFFFAOYSA-N | O=C1C=CC2=CC=CC=C12                                                |
| 1563 | 5. 036 | 269. 12769 | (3aS, 5aS, 9bR)-5a, 9-dimethyl-3-methylidene-3a, 4, 6, 7, 8, 9b-hexahydrobenzo[ <i>c</i> ][1]benzofuran-2, 5-dione                                        | [M+H] <sup>+</sup>   | 269. 12912 | C15H18O3    | Eudesmanolides, seudesmanolides, and Cinnamic acids and derivatives | CPHFAWJXZHHPEN-PSOPSSQASA-N | OC1=OC2=C(C(=C1OC)C(C)=O)CC2C1=C)C                                 |
| 1564 | 5. 036 | 221. 08017 | Dihydrodiplartine                                                                                                                                         | [M+H] <sup>+</sup>   | 221. 078   | C17H21N05   | Fatty acyl glycosides of mono- and disaccharides                    | HPXUNEGPCPBQBF-BQYQJAHWSA-N | O=C(C=C(C1=CC(OC)=C(OC)C(OC)=C1)N2C(=O)CCCC2                       |
| 1565 | 5. 04  | 427. 16019 | (2R, 3S, 4S, 5R, 6R)-2-[1-(2R, 3S, 4S, 5R)-3, 4-dihydroxy-5-(hydroxymethyl)oxolan-2-yl]oxymethyl]-6-[ <i>E</i> ]-[3-phenyliron-2-enox]oxane-3, 4, 5-triol | [M-H] <sup>-</sup>   | 427. 16095 | C20H28O10   |                                                                     | IEBPEMIXHIISM-RJSCAXEBSA-N  | OC1OC(OC2OC(OC=CC=CC=CC3C(C)C(C)C2O)C(C)C1O                        |
| 1566 | 5. 055 | 195. 06493 | trans-4-Hydroxy-3-methoxycinnamate                                                                                                                        | [M+H] <sup>+</sup>   | 195. 06519 | C10H10O4    | Hydroxycinnamic acids                                               | KSEBMQBYZTHIS-HWKANZROSA-N  | OC(=C(C)C)C=CC(\C=C(C)C)=O)=C1                                     |
| 1567 | 5. 062 | 305. 18475 | Piperanine                                                                                                                                                | [M+H] <sup>+</sup>   | 305. 18594 | C17H21N03   | Benzodioxoles                                                       | QHWOPMXDKFORMO-XVNBXDJSA-N  | O=C(C=CCCC1=CC=C2OCOC2=C1)N3CCCC3                                  |
| 1568 | 5. 068 | 276. 08633 | ACTIPHENOL                                                                                                                                                | [M+H] <sup>+</sup>   | 276. 08603 | C15H17N04   | Alkyl-phenylketones                                                 | YTLMIHBTPTWTEV-UHFFFAOYSA-N | O=C1N=C(C)CC(C1)CC(=O)C=2C=C(C=C(C2O)C)C                           |
| 1569 | 5. 075 | 218. 21074 | Triacetin                                                                                                                                                 | [M+H] <sup>+</sup>   | 218. 21001 | C9H14O6     | Triacylglycerols                                                    | URAYPUMNDPQOKB-UHFFFAOYSA-N | O=C(OC(C(=O)C)COC(=O)C)C                                           |
| 1570 | 5. 084 | 415. 19446 | Hexose + C13H19O (isomer of 1062)                                                                                                                         | [M-H] <sup>-</sup>   | 415. 19489 | C19H30O7    | Terpene glycosides                                                  | SZOPSAFLRCYJXC-UHFFFAOYNA-N | O=C2C=C(C)C(C(=CC(OC1OC(CO)C(C)C(C)C1)C(C)C(C)C)C(C)C2             |
| 1571 | 5. 092 | 470. 2735  | Hypocanine                                                                                                                                                | [M+H] <sup>+</sup>   | 470. 27399 | C24H39N08   | Aconitane-type diterpenoid alkaloids                                | BQTYHFZQSAKNQU-UHFFFAOYSA-N | OC1C(OC)C2(O)CC3C(C2O)C1(O)C4C(OC)C5C6(COC)CN(C)C4C3SC(OC)C6       |
| 1572 | 5. 094 | 197. 16608 | (1R, 3r, 8S, 9r)-1, 8-dimethyl-3, 6-diazatricyclo[4. 3. 1. 1 (3, 8)]undecan-9-ol                                                                          | [M+H] <sup>+</sup>   | 197. 164   | C11H20N2O   | 1, 4-diazepanes                                                     | JNARJHDJLSPXGM-UHFFFAOYSA-N | OC1C2(C)CN3CCN(C2)CC1(C)C3                                         |
| 1573 | 5. 121 | 179. 06984 | Coniferylaldehyde                                                                                                                                         | [M+H] <sup>+</sup>   | 179. 07027 | C10H10O3    | Methoxyphenols                                                      | DKZBBWMURDFHNE-UHFFFAOYSA-N | O=CC=CC1=CC=C(C)C(OC)=C1                                           |
| 1574 | 5. 136 | 345. 14279 | Tyr-Tyr                                                                                                                                                   | [M+H] <sup>+</sup>   | 345. 1445  | C18H20N2O5  | Dipeptides                                                          | JAQGKXUEKGKTKX-UHFFFAOYNA-N | O=C(C)C(N=C(C)C(N)CC1=CC=C(C)C1)CC2=CC=C(C)C=C2                    |
| 1575 | 5. 143 | 164. 10643 | N-acetyl-2-phenylethylamine                                                                                                                               | [M+H] <sup>+</sup>   | 164. 10698 | C10H13N0    | N-acetyl-2-arylethylamines                                          | MOCKMIXGCKTLE-UHFFFAOYSA-N  | OC(=NCCC=CC=CC1)C                                                  |
| 1576 | 5. 143 | 443. 20349 | Perlatolic acid                                                                                                                                           | [M-H] <sup>-</sup>   | 443. 20001 | C25H32O7    | Depsides and depsidones                                             | UTAQXQVSEK1WBB-UHFFFAOYSA-N | O=C(C)C1=C(C)C=C(OC(=O)C2=C(C)C(OC)C=C2CCCC)C=C1CCC(C              |
| 1577 | 5. 15  | 381. 20328 | 1-Myristoyl-2-hydroxy-sn-glycero-3-phosphate                                                                                                              | [M-H] <sup>-</sup>   | 381. 20477 | C17H35O7P   | 1-acylglycerol-3-phosphates                                         | FAZBDRGXCKPJJU-MRXNPFEDSA-N | CCCCCCCCCCCC(=O)OC([C@H](O)COP(O)(O)=O                             |
| 1578 | 5. 151 | 509. 30313 | 18b-glycyrrhetic acid                                                                                                                                     | [M-2H] <sup>2+</sup> | 509. 30276 | C30H46O4    | Triterpenoids                                                       | MPDGHEJMBKOTSU-AWOGJAJBSA-N | O=C(C)C1(C)CCC2(C)CCC3(C(=CC(=O)C4C5(C)CCC(O)C(C)C)C5(C)C4C)C2(C)C |
| 1579 | 5. 152 | 369. 22314 | 5-(3-methoxyphenyl)-N-((octahydro-1H-quinolinizin-1-yl)methyl)-1H-pyrazole-3-carboxamide                                                                  | [M+H] <sup>+</sup>   | 369. 23001 | C21H28N4O2  | Phenylpyrazoles                                                     | ZZFSKJIAK1BPSR-UHFFFAOYSA-N | O=C(NCC1CCN2CCCCC21)C3=NNC(=C3)C=CC=C(C(OC)C4                      |
| 1580 | 5. 152 | 382. 14096 | Capecitabine (Xeloda)                                                                                                                                     | [M+H] <sup>+</sup>   | 382. 138   | C15H22FN3O6 | 5'-deoxyribonucleosides                                             | GAGWJHPBLXJQN-GMTLJSCSSA-N  | O=C(OC(CCC)NC1=CC(=O)N(C=C1F)C2OC(C)C(C)C2O                        |
| 1581 | 5. 152 | 353. 16904 | meso-dihydroguaiaietic acid                                                                                                                               | [M+H] <sup>+</sup>   | 353. 17001 | C20H26O4    | Dibenzylbutane lignans                                              | ADPOLUXMYCTRR-ZIAGYMGSSA-N  | OC1=CC=C(C=C1OC)CC(C)C(C)CC2=CC=C(C)C(OC)=C2                       |
| 1582 | 5. 153 | 193. 1331  | Isoproteron-monodemethyl                                                                                                                                  | [M+H] <sup>+</sup>   | 193. 13354 | C11H16N2O   | N-phenylureas                                                       | DOULWSSZVEPIN-UHFFFAOYSA-N  | ON=C(C)NC1=CC=C(C=C1)C(C)C                                         |
| 1583 | 5. 157 | 282. 13272 | 4, 7, 8-trimethoxy-3, 5-dimethylchromen-2-one                                                                                                             | [M+H] <sup>+</sup>   | 282. 13361 | C14H16O5    | Coumarins and derivatives                                           | PKKTAMCHLIVDS-UHFFFAOYSA-N  | O=C1OC2=C(C)C(C(OC)=CC(=C2OC)=C1C)C                                |
| 1584 | 5. 159 | 383. 19971 | Venocristine                                                                                                                                              | [M-H] <sup>-</sup>   | 383. 19763 | C22H28N2O4  | Alkaloids                                                           | OYMQKBZKMFJMH-UHFFFAOYNA-N  | COC(=O)C1CC2CC(C(C)C)C1N(C3)CCC1=C2NC2=CC=C(C(OC)C=C12             |
| 1585 | 5. 174 | 174. 18509 | MENTHOL(-)                                                                                                                                                | [M+H] <sup>+</sup>   | 174. 18523 | C10H20O     | Menthane monoterpeneoids                                            | NOOLISFMXDJSKH-UHFFFAOYSA-N | OC1CC(C)CCC1C(C)C                                                  |
| 1586 | 5. 175 | 401. 1597  | aschantin                                                                                                                                                 | [M+H] <sup>+</sup>   | 401. 15948 | C22H24O7    | Furanoid lignans                                                    | ONDWGDNAPRACN-VIEDXXQZSA-N  | O(C=C1C=C(C(OC)C1OC)C2OC3C(OC2C3)C4=CC=C5OC(C=C4)C                 |
| 1587 | 5. 176 | 327. 08426 | Isosaxalin                                                                                                                                                | [M+H] <sup>+</sup>   | 327. 08401 | C16H16O6    | Psoralens                                                           | FOINLJRVEBYARJ-UHFFFAOYSA-N | O=C1OC=2C(C=C1)=CC=3C=CC3C2OCC(O)C(O)C(C)C                         |
| 1588 | 5. 179 | 209. 07835 | Sinapyl alcohol                                                                                                                                           | [M-H] <sup>-</sup>   | 209. 08194 | C11H14O4    | Methoxyphenols                                                      | LZPOPEXOUVTGJS-UHFFFAOYSA-N | OC=1C(OC)=CC(C=CCO)=CC1OC                                          |
| 1589 | 5. 184 | 309. 11179 | Warfarin                                                                                                                                                  | [M+H] <sup>+</sup>   | 309. 11212 | C19H16O4    | 4-hydroxycoumarins                                                  | PJYWKTKQMONHTI-UHFFFAOYNA-N | CC(CC(C1=CC=CC=C1)C2=C(C3=CC=CC=C3OC2=O)O)=O                       |

|      |       |           |                                                                                                                  |          |           |              |                                                  |                              |                                                                                |
|------|-------|-----------|------------------------------------------------------------------------------------------------------------------|----------|-----------|--------------|--------------------------------------------------|------------------------------|--------------------------------------------------------------------------------|
| 1590 | 5.186 | 427.15753 | 9,11,12a-trihydroxy-2,3-dimethoxy-8-(3-methylbut-2-enyl)-6,6a-dihydrochromeno[3,4-b]chromen-12-one               | [M-H]-   | 427.16016 | C23H24O8     | Rotenones                                        | LAUXTJGTOIBBOB-UHFFFAOYSA-N  | O=C1C2=C(O)C(C=O)C(C=C2)OC(=O)C(=O)C(C=C1)C(=O)C                               |
| 1591 | 5.186 | 187.09703 | Azelaic acid (Not validated)                                                                                     | [M-H]-   | 187.0974  | C9H16O4      | Organic acids                                    | BDJRBEYXGNGYIS-UHFFFAOYSA-N  | O=C(O)CCCCCCC(=O)O                                                             |
| 1592 | 5.189 | 276.99207 | FT-PFCA                                                                                                          | [M-H]-   | 276.99167 | C6H3F9O2     | PFSA                                             | PMVMXTIBUIRJHZ-UHFFFAOYSA-N  | O=C(O)CC(F)(F)C(F)(F)C(F)(F)C(F)(F)F                                           |
| 1593 | 5.191 | 317.065   | methyl 2-(2,6-dihydroxy-4-methylbenzoyl)-3,5-dihydroxybenzoate                                                   | [M-H]-   | 317.06668 | C16H14O7     | Benzophenones                                    | G1JDACRMFMBET-UHFFFAOYSA-N   | O=C(OC)C=C(C=O)C(C=O)C1C(=O)C2=C(O)C=C(C=C2)C                                  |
| 1594 | 5.191 | 466.23239 | Norgenaime D_130072                                                                                              | [M+H]+   | 466.233   | C26H31N3O5   | Pyrrroloindoles                                  | DM1IGSHOPYKWKW-RRGUOAIQSA-N  | O=C1N2CCCC2(O)C(=O)N3C1CC4(O)C5=CC=C6OC(C=C6)=C5N34C(=C)C(C)C                  |
| 1595 | 5.195 | 651.35663 | Lopinavir (ABT-378)                                                                                              | [M+H]+   | 651.35199 | C37H48N4O5   | Valine and derivatives                           | KJHKTHMKYKJE-SUGCFRTWSA-N    | O=C1NCCN1C(C(=O)NC(C=CC(=O)C2)CC(O)C(NC(=O)COC=3C(=CC(=C3)C)CC=4C(=O)C741C1C   |
| 1596 | 5.197 | 493.13254 | Anthocyanidin base + 40, 2MeO, 0-Hex                                                                             | [M+H]+   | 493.13281 | C23H25O12    | Anthocyanidin O-glycosides                       | PUXQTDZNOHRLW1-UHFFFAOYNA-O  | O=C2C=C(O)C=3C=C(OC1OC(C)C(O)C1(O)C)C(=[O+]=C3(C=C2))C=C4C(OC)C(O)=C(OC)C=4    |
| 1597 | 5.197 | 293.1012  | Benzyl glucopyranoside                                                                                           | [M+H]+   | 293.10001 | C13H18O6     | O-glycosyl compounds                             | GKHCBYBLTXYEY-UJPOAA1JSA-N   | OC1OC(OC=C2C=CC2)C(O)C(O)C1O                                                   |
| 1598 | 5.197 | 310.20081 | Metadone                                                                                                         | [M+H]+   | 310.20099 | C21H27NO     | Diphenylmethanes                                 | USSIQVCVUKGNF-UHFFFAOYSA-N   | O=C(CC)C(C=C1CC=CC1)(C=CC=CC2)CC(N(C)C)C                                       |
| 1599 | 5.199 | 288.25189 | Emodin                                                                                                           | [M+H]+   | 288.25159 | C15H10O5     | Hydroxyanthraquinones                            | RHMXJGYXNZAPX-UHFFFAOYSA-N   | O=C1C=2C(C(O)C=C(O)C2)C(O)C3=C(O)C=C(C=C13)C                                   |
| 1600 | 5.201 | 189.11185 | Azelaic acid                                                                                                     | [M+H]+   | 189.11211 | C9H16O4      | Medium-chain fatty acids                         | BDJRBEYXGNGYIS-UHFFFAOYSA-N  | O=C(O)CCCCCCC(=O)O                                                             |
| 1601 | 5.205 | 295.06955 | alpha-Naphthoflavone                                                                                             | [M+H]+   | 295.07001 | C19H12O2     | Flavones                                         | VFMMPHCGEFGIP-UHFFFAOYSA-N   | O=C1C=C(OC2=C1C=CC=CC2)C=C(C=C1)C                                              |
| 1602 | 5.242 | 367.16376 | 4-(4-(2,3-dihydrobenzo[b][1,4]dioxin-6-yl)-3-methyl-1H-pyrazol-5-yl)-6-propylbenzene-1,3-diol                    | [M+H]+   | 367.164   | C21H22N2O4   | Phenylpyrazoles                                  | FOUM01ACEBZPT-UHFFFAOYSA-N   | OC=1C=C(O)C(C=CC1C=2N=C(C2C3=CC=C4OCOC4=C3)C)CCC                               |
| 1603 | 5.251 | 365.14929 | 1-hydroxy-4-[(2S,3R,4S,5S,6R)-3,4,5-trihydroxy-6-(hydroxymethyl)oxan-2-yl]oxynaphthalene-2-carboxylic acid       | [M-H]-   | 365.15024 | C17H18O9     | Phenolic glycosides                              | STXNGSCHXKQJX-OQAPJJDNSA-N   | O=C(O)C1=C(C(OC2OC(CO)C(O)C2O)C2O)C3=C=CC=CC3C1O                               |
| 1604 | 5.251 | 235.16858 | Curcumenol                                                                                                       | [M+H]+   | 235.16925 | C15H22O2     | Guianes                                          | ISPMXVMWEWJGJ-UHFFFAOYSA-N   | OC12OC(C1C(C)C)C(C)C(C(=C2)C)CCC3C                                             |
| 1605 | 5.251 | 316.03421 | Efavirenz                                                                                                        | [M+H]+   | 316.03467 | C14H9ClF3NO2 | Benzoazazines                                    | XPOQHMRABVBWR-UHFFFAOYNA-N   | C1CC1C=CC2(C=3C=C(C=CC3=N(C)O2)C1)C(F)F                                        |
| 1606 | 5.253 | 351.11884 | Isoflavone base + 20 + 1MeO + 1Prenyl                                                                            | [M-H]-   | 351.1218  | C21H20O5     | Prenylated isoflavones                           | JQNSUD1G1GIOL-UHFFFAOYSA-N   | O=C1C=COC(=C2C=C(O)C(=C(O)C1)C2)CC(C)C3=C=CC(=O)C=C3                           |
| 1607 | 5.255 | 377.12982 | Griseofulvic Acid                                                                                                | [M+H]+   | 377.12964 | C16H15ClO6   | Benzofurans                                      | KUTVEHZNKAAAO-UHFFFAOYSA-N   | O=C1C=C(O)C2(OC=3C1)C(=O)C=C(O)C(OC3C2=O)C(C)C1                                |
| 1608 | 5.265 | 515.18005 | Cilnidipine                                                                                                      | [M+H]+   | 515.17902 | C27H28N2O7   | Dihydropyridinecarboxylic acids and derivatives  | KJEBULYHNRNJT-EHJHZJOJSA-N   | O=C(OC=CC(=O)C=CC1)C2=C(NC(=C(C(=O)O)C2)C=CC=C(C3)N4=C(O)C=CC3)C               |
| 1609 | 5.268 | 435.16284 | 4-[(2R,3R,4S,5S,6R)-3,4,5-trihydroxy-6-(hydroxymethyl)oxan-2-yl]oxypentan-2-yl (E)-3-(4-hydroxyphenyl)propanoate | [M+H]+   | 435.16254 | C20H28O9     | Fatty acyl glycosides of mono- and disaccharides | RMFDCHYDYYNFA-AKVWERCLSA-N   | O=C(OC(C)CC(OC1OC(CO)C(O)C(O)C1O)C)C=C2C=CC=C(O)C=C2                           |
| 1610 | 5.282 | 355.14804 | Isoxanthohumol                                                                                                   | [M+H]+   | 355.14999 | C21H22O5     | 8-prenylated flavanones                          | YKGCBLLMDSAV-SHVURJKSA-N     | O=C1C=2C(OC)=CC(O)C(C2OC(C3=CC=C(O)C=C3)C1)CC=C(C)C                            |
| 1611 | 5.287 | 643.38629 | Cimigenol-3-O-alpha-L-arabinoside                                                                                | [M+2H]2+ | 643.38202 | C35H56O9     | Cucurbitacin glycosides                          | BTPYUWOBZFGKA1-BKJHYQRZSA-N  | OC1OC(OC2CC34CC4COC(C)C7C(C)CC8OC(OC8(O)(C)C)C(O)C1)C(C)C5CC3C2(C)C(C)C1O      |
| 1612 | 5.302 | 206.08046 | Methoxyindoleacetic acid                                                                                         | [M+H]+   | 206.08118 | C11H11NO3    | Indole-3-acetic acid derivatives                 | COCNDHOP1DHTH-UHFFFAOYSA-N   | CCO1=CC2(C=O)CC3(C)C2(O)CC4C=CC(=O)C(=CC=C4)C6C8C(C(C=C7)C(C8)C(C)C)C(C)C7     |
| 1613 | 5.303 | 570.35529 | Secopentitrem D_120253                                                                                           | [M+2H]2+ | 570.35699 | C37H47NO4    | Naphthopyrans                                    | YZRQMJFFPMHJA-Y-DTOWOETISA-N | OC1C=C2C(OC1(C)C)CC3(C)C2(O)CC4C=CC(=O)C(=CC=C4)C6C8C(C(C=C7)C(C8)C(C)C)C(C)C7 |
| 1614 | 5.328 | 225.1481  |                                                                                                                  |          |           |              |                                                  |                              |                                                                                |

|      |        |            |                                                                                                                                                                                                                               |                      |            |              |                                    |                              |                                                                                             |
|------|--------|------------|-------------------------------------------------------------------------------------------------------------------------------------------------------------------------------------------------------------------------------|----------------------|------------|--------------|------------------------------------|------------------------------|---------------------------------------------------------------------------------------------|
| 1633 | 5. 469 | 497. 19168 | Strictosamide                                                                                                                                                                                                                 | [M-H] <sup>-</sup>   | 497. 19171 | C26H30N2O8   | Carbolines                         | LBRPLJCNRXLSL-UHFFFAOYNA-N   | O=C5C2=COC(OC1OC(CO)C(O)C(C1)C(C)=C)C2OC6C=4NC=3C=CC=C3C=4CNC56                             |
| 1634 | 5. 47  | 265. 11737 | conocarpan                                                                                                                                                                                                                    | [M-H] <sup>-</sup>   | 265. 12051 | C18H18O2     | 2-arylbenzofuran<br>flavonoids     | GXJSAXNLJFDPQ-CGBXWHS-CSA-N  | OC1=CC=C(C=C1)C2OC3=CC=C(C=CC)C=C3C2C                                                       |
| 1635 | 5. 471 | 403. 16257 | (Z)-3-(4-hydroxyphenyl)-N-[4-[[[(E)-3-(4-hydroxyphenyl)prop-2-en-1-yl]amino]butyl]amino-2-aminidene                                                                                                                           | [M+H] <sup>+</sup>   | 403. 16281 | C22H24N2O4   | Coumaric acids and<br>derivatives  | PYVBFDXJDSMM-MFUUIURDSA-N    | OC(=NCCCCN(C)O)C=C1=CC=C(O)C=C1C=C2=CC=C(O)C=C2                                             |
| 1636 | 5. 474 | 417. 13855 | 7-hydroxy-2-[4-[(2S,3R,4S,5S,6R)-3,4,5-trihydroxy-6-(hydroxymethyl)oxan-2-yl]oxyphenyl]-2,3-dihydrochromen-4-one                                                                                                              | [M-H] <sup>-</sup>   | 417. 13687 | C21H22O9     | Flavonoid O-glycosides             | DEMKZLAVYISIA-UZQFATADSA-N   | O=C1C2=CC=C(C)C=C2OC(C3=CC=C(C(OC4OC(CO)C(O)C(O)C4O)C=C3)OC1                                |
| 1637 | 5. 475 | 449. 14609 | Isosakuranin                                                                                                                                                                                                                  | [M+H] <sup>+</sup>   | 449. 14499 | C22H24O10    | Flavonoid-7-O-glycosides           | KEEWIHTDSNESJZ-JZHVRRPSA-N   | O=C1C2=C(C)C=C(C(OC3OC(CO)C(O)C(O)C3O)C=C2OC(C4=C(C)C(OC)C=C4)C1                            |
| 1638 | 5. 495 | 430. 27469 | Mifepristone                                                                                                                                                                                                                  | [M+H] <sup>+</sup>   | 430. 27405 | C29H35NO2    | Oxosteroids                        | VKHAHZOOSURJNA-UHFFFAOYNA-N  | O=C1C=C2C(=C3C(=CC(=CC(=C3)C(OC5(C)C(OC5(C)C(OC)C3C2)C1                                     |
| 1639 | 5. 498 | 183. 07932 | Triethylphosphate                                                                                                                                                                                                             | [M+H] <sup>+</sup>   | 183. 07808 | C6H15O4P     | Trialkyl phosphates                | DQWPFSLDJDLRL-UHFFFAOYSA-N   | CCOP(=O)(OC)OC                                                                              |
| 1640 | 5. 504 | 619. 36914 | Desferrioxamine G1                                                                                                                                                                                                            | [M+2H] <sup>2+</sup> | 619. 37    | C27H50ON6O10 | N-acyl amines                      | MIVGUYBAQIHKPJ-UHFFFAOYSA-N  | O=C(O)CCC(=O)N(O)CCCCCNC(=O)CCC(=O)N(O)CCCCCNC(=O)CCC(=O)N(O)CCCCCNC                        |
| 1641 | 5. 511 | 335. 1221  | 5-hydroxy-2,2-dimethyl-10-(2-methylbut-3-en-2-yl)pyrano[3,2-g]chromen-8-one                                                                                                                                                   | [M+H] <sup>+</sup>   | 335. 12537 | C19H20O4     | Linear pyranocoumarins             | WYMMGQSPNWCIK-UHFFFAOYSA-N   | O=C1OC2=C(C=C1)C(O)=C3C=CC(OC3=C2C(C=C)C(C)C)C(C)                                           |
| 1642 | 5. 512 | 617. 36523 | Cimicidanol-3-O-alpha-L-arabinoside                                                                                                                                                                                           | [M+H] <sup>+</sup>   | 617. 37    | C35H52O9     | Cycloartanols and<br>derivatives   | PYBFXJMIKJNNAJ-UHFFFAOYSA-N  | O=C(C(C)C)C1C(=O)CC2(C3=CC4C(C)C(C)C(OC5OC(C)C(O)C5O)C(C)C4)CC6(C)C(C)C(C)C2C1              |
| 1643 | 5. 515 | 325. 14825 | 4-amino-2-hydroxy-5-[[1-hydroxy-1-(5-oxo-6-bicyclo[4.1.0]hept-3-en-2-yl)propan-2-yl]amino]-5-oxopentanoic acid                                                                                                                | [M-H] <sup>-</sup>   | 325. 14774 | C15H22N2O6   | Glutamic acid and<br>derivatives   | SYGQXRLXOXXDRP-UHFFFAOYSA-N  | O=C(O)C(C)CC(N(C)O)=NC(C)C(O)C1C2(=O)C=C-CC2C1                                              |
| 1644 | 5. 52  | 284. 12744 | Coumaroyl tyramine                                                                                                                                                                                                            | [M+H] <sup>+</sup>   | 284. 12851 | C17H17NO3    | Coumaric acid and<br>derivatives   | RXGUTQKRCXHALN-UHFFFAOYSA-N  | O=C(C=CC1=CC=C(C)C=C1)NCCC2=CC=C(O)C=C2                                                     |
| 1645 | 5. 523 | 389. 25284 | Ilicicolin A                                                                                                                                                                                                                  | [M-H] <sup>-</sup>   | 389. 2518  | C23H31ClO3   | Sequiterpenoids                    | MHWOMRMBQSGSTFS-JTCWOHRSA-N  | O=CC1=C(O)C(=C(C)C)C(C)=C1OC=CC(C)CCC=C(C)CCC=C(C)C                                         |
| 1646 | 5. 537 | 213. 07297 | N,N-Dimethyl-N'-p-tolylsulphamide                                                                                                                                                                                             | [M-H] <sup>-</sup>   | 213. 07033 | C9H14N2O2S   | Sulfanilides                       | UPCDOJQOXWCCSD-UHFFFAOYSA-N  | CN(C)S(=O)(=O)NC1=CC=C(C)C=C1                                                               |
| 1647 | 5. 551 | 257. 12698 | 6-ethyl-2,3,5-trimethyl-7H-furo[3,2-g]chromen-7-one                                                                                                                                                                           | [M+H] <sup>+</sup>   | 257. 12    | C16H16O3     | Psoralens                          | USSZROTZVDHBM-UHFFFAOYSA-N   | O=C1OC=2C=C3OC(=C(C3=CC2=C1CC)C)C(C)                                                        |
| 1648 | 5. 568 | 650. 4295  | (1S,2R,4aS,6aR,6bR,10S,12aR,14bS)-1,2,6b,9,9,12a-hexamethyl-10-[1-(2R,3R,4S,5S,6R)-3,4,5-trihydroxy-6-methylhexan-2-yl]oxy-5-[(8aS)-2,5,5,8a-tetramethyl-3-oxo-4a,6,7,8-tetrahydro-4H-naphthalen-1-yl]-3-methylpentanoic acid | [M+H] <sup>+</sup>   | 650. 42621 | C36H56O9     | Triterpene saponins                | PUOQHFWBKXTHST-MPLMRMBSA-N   | O=C(O)C1C2(=CCC3C4(C)CC(OC5OC(C)C(O)C5O)C(C)C4)CC3(C)C(C)C(C)C2C1                           |
| 1649 | 5. 573 | 321. 24225 | 5-[(8aS)-2,5,5,8a-tetramethyl-3-oxo-4a,6,7,8-tetrahydro-4H-naphthalen-1-yl]-3-methylpentanoic acid                                                                                                                            | [M+H] <sup>+</sup>   | 321. 2424  | C20H32O3     | Diterpenoids                       | BARZJLALPXZLMN-RJGDCVCESA-N  | O=C(O)CC(C)CCC=C(C(=O)CC2C1(C)CCC2(C)C)C1                                                   |
| 1650 | 5. 582 | 322. 12711 | HERALENOL                                                                                                                                                                                                                     | [M+H] <sup>+</sup>   | 322. 12851 | C16H16O6     | Psoralens                          | FOINLJRVEBYARJ-UHFFFAOYSA-N  | O=C1OC=2C(C=C1)=CC=3C=CC3C2OCC(O)C(O)C(C)                                                   |
| 1651 | 5. 588 | 179. 03394 | 4-Hydroxyphenylpyruvic acid                                                                                                                                                                                                   | [M-H] <sup>-</sup>   | 179. 03499 | C9H8O4       | Phenylpyruvic acid<br>derivatives  | KKADPXVIOXHKN-UHFFFAOYSA-N   | O=C(O)C(=O)CC1=CC=C(C)C=C1                                                                  |
| 1652 | 5. 588 | 259. 09692 | 6-methoxy-7-(3-methylbut-2-enoxy)chromen-2-one                                                                                                                                                                                | [M-H] <sup>-</sup>   | 259. 09756 | C15H16O4     | Coumarins and<br>derivatives       | ZLPLFUBVEZYDX-UHFFFAOYSA-N   | O=C1OC=2C=C(OC=C(C)C)C(OC)=CC2=C1                                                           |
| 1653 | 5. 596 | 433. 17191 | osmanthuside H                                                                                                                                                                                                                | [M+H] <sup>+</sup>   | 433. 17044 | C19H28O11    | O-glycosyl compounds               | IVRQZYXJBVMHCW-OTCFHACESA-N  | OC1=CC=C(C=C1)COC2OC(COC3OC(C)C(CO)C3O)C(C)C2O                                              |
| 1654 | 5. 598 | 263. 12848 | Abscisic acid                                                                                                                                                                                                                 | [M-H] <sup>-</sup>   | 263. 12888 | C15H20O4     | Abscisic acids and<br>derivatives  | JLIDBQLQVAYINE-UHFFFAOYNA-N  | O=C(O)C(=C(C=CC1(C)C(=CC(=O)CC1(C)C)C)C                                                     |
| 1655 | 5. 601 | 137. 02368 | 4-Hydroxybenzoic acid                                                                                                                                                                                                         | [M-H] <sup>-</sup>   | 137. 02441 | C7H6O3       | Hydroxybenzoic acid<br>derivatives | FJKROLJGYXJWQN-UHFFFAOYSA-N  | OC(=O)C1=CC=C(C)C=C1                                                                        |
| 1656 | 5. 602 | 843. 35504 | (8R,10R,11S,11aS,13S)-9-ethyl-8,13-dihydroxy-7-(2-(((10S,13R)-14-hydroxy-10,13-dimethyl-17-(5-oxo-2,5-dihydrofuran-3-yl)hexadecahydro-1H-                                                                                     | [M+H] <sup>+</sup>   | 843. 34998 | C45H61BrN2O7 | Cardenolides and<br>derivatives    | JPBBOIVVPLQMCQ-VYWZAZLPAS-M  | [Br-]<br>1,10,11,17-tetrahydro-2H-pyran-2-yl)-5-oxo-2,5-dihydrofuran-3-yl]hexadecahydro-1H- |
| 1657 | 5. 604 | 507. 15305 | Scutellarioside II                                                                                                                                                                                                            | [M-H] <sup>-</sup>   | 507. 15079 | C24H28O12    | Coumaric acid esters               | MVTLFXPHKDVATC-LAQGVYQA-SN   | O=C(OC12OC2(C)C3C(=CC(OC4OC(CO)C(O)C(O)C4O)C31)C=CC5=CC=C(O)C=C5                            |
| 1658 | 5. 604 | 352. 16827 | Usaramine                                                                                                                                                                                                                     | [M+H] <sup>+</sup>   | 352. 17001 | C18H25NO6    | Macrolides and analogues           | BCJMNZRGJAVLD-VMOBWIEOSA-N   | O=C1OC2C8NCC=C(COC(=O)C(O)C(C)C(C)C1=CC)C32                                                 |
| 1659 | 5. 608 | 265. 1431  | (9E)-11a-hydroxy-3,6,10-trimethyl-6,7,8,11-tetrahydro-4H-cyclodeca[h]furan-2,5-dione                                                                                                                                          | [M+H] <sup>+</sup>   | 265. 14343 | C15H20O4     | Germacranolides and<br>derivatives | SCOXKWLFRILEY-WEVYVXLNSA-N   | O=C1OC2(C)C(=C(C)CC(=O)C(C)CCC=C(C)C2                                                       |
| 1660 | 5. 608 | 273. 13394 | afzelechin                                                                                                                                                                                                                    | [M-H] <sup>-</sup>   | 273. 13797 | C15H14O5     | Flavan-3-ols                       | RSYUFYQTACJFML-DZGQCQFKSA-N  | OC1=CC=C(C=C1)C2OC=3C=C(C)C=C(O)C3CC2O                                                      |
| 1661 | 5. 612 | 255. 11237 | Nepafenac                                                                                                                                                                                                                     | [M+H] <sup>+</sup>   | 255. 11301 | C15H14N2O2   | Benzophenones                      | QEFAQIPZVLVERP-UHFFFAOYSA-N  | O=C(N)CC=C1C=CC=C(C(=O)C=2C=CC=CC2)C1N                                                      |
| 1662 | 5. 614 | 448. 27548 | Jervine                                                                                                                                                                                                                       | [M+H] <sup>+</sup>   | 448. 28    | C27H39NO3    | Jerveratrum-type<br>alkaloids      | CLEXFLHGFJONT-UHFFFAOYSA-N   | O=C1C2=C(C)C3(OC4CC(C)CNC4C3)CCC2C5CC=O6CC(O)CC6(C)C15                                      |
| 1663 | 5. 619 | 274. 08472 | Pomalidomide                                                                                                                                                                                                                  | [M+H] <sup>+</sup>   | 274. 082   | C13H11N3O4   | Phthalimides                       | UYSMNLNDYGZFPF-UHFFFAOYSA-N  | O=C1C=2C=CC(=O)N(C2C(=O)N1C3C(=O)NC(=O)C3                                                   |
| 1664 | 5. 63  | 479. 15591 | Isolindleyin                                                                                                                                                                                                                  | [M+H] <sup>+</sup>   | 479. 155   | C23H26O11    | Phenolic glycosides                | KHUVRRVIZOSFTI-UHFFFAOYSA-N  | O=C(OC1C(OC2=CC=C(C=2)CCC(=O)C(OC(CO)C(O)C1O)C3=CC(=O)C(OC(CO)C=C3                          |
| 1665 | 5. 664 | 457. 2757  | Mundulone                                                                                                                                                                                                                     | [M+H] <sup>+</sup>   | 457. 2749  | C26H26O6     | 6-prenylated<br>isoflavones        | KJTDAZHLWHEULN-UHFFFAOYSA-N  | O=C1C(=CC=2C=C3OC(C)C(C)C(OC3=C21)=4C=CC=5OC(C=CC5=COC)C(C                                  |
| 1666 | 5. 668 | 218. 1898  | Prolintane                                                                                                                                                                                                                    | [M+H] <sup>+</sup>   | 218. 19032 | C15H23N      | Amphetamines and<br>derivatives    | OJQPSBCUMRIPEL-UHFFFAOYNA-N  | CCCC(C(C)=CC=C(C)C)N1CCCC1                                                                  |
| 1667 | 5. 67  | 331. 12057 | sulochrin                                                                                                                                                                                                                     | [M-H] <sup>-</sup>   | 331. 11725 | C17H16O7     | Benzophenones                      | YJRLSCDYLRBITZ-UHFFFAOYSA-N  | O=C(OC)C=C1C=C(O)C=C(OC)C1(=O)C2=C(O)C=C(C=C2O)C                                            |
| 1668 | 5. 672 | 255. 11191 | Obtusaquinone                                                                                                                                                                                                                 | [M+H] <sup>+</sup>   | 255. 11137 | C16H14O3     | P-quinomethanes                    | LUZUAYAKZLCOCQ-BHHNPLQBSA-N  | O=C1C=C(C(OC)C(=CC=CC=CC2=CC=CC2)C=C1O                                                      |
| 1669 | 5. 674 | 465. 18945 | 2-[[[4-(2,4-dihydroxy-3,5,6-trimethylbenzoyl)oxy-2-hydroxy-6-methylbenzoyl]amino]-3-hydroxybutanoic acid                                                                                                                      | [M+H] <sup>+</sup>   | 465. 18674 | C22H25NO9    | Depside and depsidones             | NJVCQZYVEIAGLE-UHFFFAOYSA-N  | O=C(O)C(N=C(C)O)C1=C(C)C(OC(=O)C=C2(C)C(=O)C(C2)C(C)=C1(C)C(O)C                             |
| 1670 | 5. 676 | 319. 20114 | Chaulmoogric Acid                                                                                                                                                                                                             | [M+H] <sup>+</sup>   | 319. 20337 | C18H32O2     | Long-chain fatty acids             | XMQQWNRDPAAUJB-UHFFFAOYSA-N  | O=C(O)CCCCCCCCCCCCC1C=CCC1                                                                  |
| 1671 | 5. 677 | 238. 14311 | N,N-Diethyl-3,4-dimethoxybenzamide                                                                                                                                                                                            | [M+H] <sup>+</sup>   | 238. 14377 | C13H19NO3    | Dimethoxybenzenes                  | ZXTJMIZZI CSORJ-UHFFFAOYSA-N | CN(C)CC(C(=O)C1=CC(OC)=C(OC)C=C1O)C=C1                                                      |
| 1672 | 5. 678 | 463. 28424 | Methyl-mappain                                                                                                                                                                                                                | [M+H] <sup>+</sup>   | 463. 28201 | C30H38O4     | Stilbenes                          | MRXGJOCASBBDTM-FVFOHYRDSA-N  | OC=1C=C(C=CC=2C(OC)C(C)=C(C2)CC=C(C)CCC=C(C)C(C)C(=O)C1C=C(C)C                              |
| 1673 | 5. 68  | 208. 13298 | Pesticide3_Fenobucarb_C12H17N02_Bassa                                                                                                                                                                                         | [M+H] <sup>+</sup>   | 208. 133   | C12H17NO2    | Phenyl methylcarbamates            | D1RFUJHNVNOMY-UHFFFAOYSA-N   | OC(=NC)OC=1C=CC=CC1C(C)CC                                                                   |
| 1674 | 5. 681 | 479. 15488 | calceolarioside A                                                                                                                                                                                                             | [M+H] <sup>+</sup>   | 479. 15479 | C23H26O11    | Coumaric acids and<br>derivatives  | UHGZLYCYRQESL-VJWFJHQPSA-N   | O=C(OC1C(OC)C(O)C(OC)C2=CC=C(O)C(O)C2)OC1OC(C=CC3=CC=C(C)C3)C(C)C                           |
| 1675 | 5. 684 | 281. 19653 | Aspidofractinine                                                                                                                                                                                                              | [M+H] <sup>+</sup>   | 281. 20099 | C19H24N2     | Aspidofractine alkaloids           | BITBZWCWSCFPBB-MRCYZYCBSA-N  | C=C1C=C2C(C(C1)NC34CC5(CCCN6CCC23C65)CC4                                                    |

|      |       |           |                                                                                                                                                     |                      |           |              |                                            |                              |                                                                                                                        |
|------|-------|-----------|-----------------------------------------------------------------------------------------------------------------------------------------------------|----------------------|-----------|--------------|--------------------------------------------|------------------------------|------------------------------------------------------------------------------------------------------------------------|
| 1676 | 5.684 | 267.11902 | Ponatinib (AP24534)                                                                                                                                 | [M+H] <sup>+</sup>   | 267.11801 | C29H27F3N6O  | Benzanilides                               | PHXJVRSECI GDHY-UHFFFAOYSA-N | O=C(NC(=C(C=C(C=C1)C(F)(F)F)N2C3C(C(C2)C3=CC=C(C(C(=C4)C=CN=C5C=C(C(=N4)S)=C3)C                                        |
| 1677 | 5.686 | 229.10693 | 2-(6-hydroxyhexyl)-3-methylidenebutanedioic acid                                                                                                    | [M-H] <sup>-</sup>   | 229.10814 | C11H18O5     | Medium-chain hydroxy acids and derivatives | DHYXMTJVCPCBB-UHFFFAOYSA-N   | O=C(O)(C=C(C=C(C(=O)O)CCCCO                                                                                            |
| 1678 | 5.687 | 504.23227 | N-(1-(2-amino-2-oxoethyl)piperidin-4-yl)-3-(4-(hydroxy-6-methyl-2-oxo-2H-pyran-3-yl))-3-(2,3,4-trimethoxyphenyl)propanamide                         | [M+H] <sup>+</sup>   | 504.23001 | C25H33N3O8   | Alpha amino acid amides                    | YE1WCPFXBQSECZ-UHFFFAOYSA-N  | O=C1OC(=C(O)=C1C(C2=CC=C(C(=O)C(C(=C2O)CC(=O)N3C3C(C(C(=O)N)C3)C                                                       |
| 1679 | 5.693 | 349.13013 | [(10Z)-6,10-bis(hydroxymethyl)-3-methylidene-2-oxo-3a,4,5,6,7,8,9,11a-octahydrocyclodecabifuran-4-yl]-2-methylpropan-2-enoate                       | [M-H] <sup>-</sup>   | 349.13354 | C19H26O6     | Germaconanilides and derivatives           | RJHSXEZOOJQAF-ZSO1EALJSA-N   | O=C(OC1CC(CO)CCCC(=CC2OC(=O)C(C2)CO)C(=C)C                                                                             |
| 1680 | 5.702 | 279.1813  | cyclopeptide                                                                                                                                        | [M-H] <sup>-</sup>   | 279.17978 | C17H16N2O2   | 1,4-benzodiazepines                        | KSQNKZMAGACTL-UHFFFAOYSA-N   | O=C1C=2C=CC=CC2N=C(O)C(N1C)CC=3C=CC=CC3                                                                                |
| 1681 | 5.72  | 488.97534 | Pesticide1 Temephos_C16H20O6P2S3, O, O', O'-Tetramethyl O, O'-(sulfanedialdi-4,1-nphenylene) bis(phosphorothioate)                                  | [M+H] <sup>+</sup>   | 488.979   | C16H20O6P2S3 | Phenyl thiophosphates                      | WJZJWCUNJNYAI-UHFFFAOYSA-N   | S=P(OC1=CC=C(CSC2=CC=C(COP(=S)(OC)OC)=C2)C=C1)(OC)OC                                                                   |
| 1682 | 5.723 | 483.30066 | TRIDESACETOXYKHIVORIN                                                                                                                               | [M+H] <sup>+</sup>   | 483.30237 | C26H36O7     | Limonoids                                  | MQOMSFBIYXTTE-F1YJXLSPSA-N   | O=C1OC(C2=CC=C(C2)C3(C)CC4C5(C)C(O)CC(O)C(C)C(C)C5CC(O)C4(C)C6OC7C16                                                   |
| 1683 | 5.725 | 477.15842 | Benzyl alcohol + Hex-Hex                                                                                                                            | [M-H] <sup>-</sup>   | 477.15961 | C19H28O11    | Alkyl benzyl hexosides                     | WXKRKUZTXJFY-UHFFFAOYNA-N    | OC3OC(OC1=CC=CC=C1)C(OC2OC(C)C(O)C(O)C2(O)C(O)C3(O)C                                                                   |
| 1684 | 5.727 | 370.21509 | (1S,8R,16S,17R)-11,12-dimethoxy-5,15-diazahexacyclo[13.4.2.0,02.02.02.02.02.02.02]henicosic-2,9,11,13-tetraen-                                      | [M+H] <sup>+</sup>   | 370.21249 | C21H24N2O3   | Aminoguanolines and derivatives            | BOPPHZK1KFBHB-GEOUA10SA-N    | O=C1N2C3=CC(OC)=C(OC)C=C3C4C5NCC5=CC6(C1)CCC4C256                                                                      |
| 1685 | 5.727 | 537.16302 | [(1aS,1bS,2S,5aR,6aS)-1a-(hydroxymethyl)-2-[(2S,3R,4S,5S,6R)-3,4,5-trihydroxy-6-(hydroxymethyl)oxan-2-yl]oxy-2,5a,6,6a-tetrahydro-1bH-              | [M-H] <sup>-</sup>   | 537.16138 | C25H30O13    | Comaric acids and derivatives              | LRHHPZILMP1MIY-GGKSNITSA-N   | O=C(OC1C2OC(CO)C3C(OC=C1C3)OC4OC(CO)C(CO)C2(O)C4O)C=CC=C(CO)C(CO)=C5                                                   |
| 1686 | 5.727 | 161.0594  | 4-Methylcoumarin                                                                                                                                    | [M+H] <sup>+</sup>   | 161.05971 | C10H8O2      | Coumarins and derivatives                  | PSGQCSGKJLRL-UHFFFAOYSA-N    | CC1=CC(=O)OC2=CC=CC=C12                                                                                                |
| 1687 | 5.727 | 295.04913 | Butin                                                                                                                                               | [M+H] <sup>+</sup>   | 295.04999 | C15H12O5     | Flavanones                                 | MJBPQUQJNAPAZ-AWEZNCPLSA-N   | O=C1C2=CC=C(CO)C=C2OC(C3=CC=C(CO)C(CO)=C3)C1                                                                           |
| 1688 | 5.727 | 439.18497 | Diferuloyl putrescine                                                                                                                               | [M-H] <sup>-</sup>   | 439.18689 | C24H28N2O6   | Ferulic acid and derivatives               | CHEZHJQHCYLF1-UHFFFAOYSA-N   | OC(=NCCCC(CO)C(=O)CC=1C=CC(O)=C(OC)C=C1)C=CC2=CC(OC)=C(C(=O)C2                                                         |
| 1689 | 5.727 | 336.07516 | Gossypetin                                                                                                                                          | [M+H] <sup>+</sup>   | 336.07138 | C15H10O8     | Flavonols                                  | YRRAGUMVDQZ1Y-UHFFFAOYSA-N   | O=C1C(O)=C(OC=2C(O)=C(O)C=C(CO)C12)C=3C=CC(O)=C(O)C3                                                                   |
| 1690 | 5.727 | 341.05438 | lecanoric acid                                                                                                                                      | [M+H] <sup>+</sup>   | 341.06    | C16H14O7     | Depsides and depsidones                    | HEMSJKZDNNSEW-UHFFFAOYSA-N   | O=C(O)C1=C(O)C(C(OC(=O)C=2C(O)=CC(O)=CC2)C=C1                                                                          |
| 1691 | 5.727 | 339.08389 | methyl 2-(9-hydroxy-1-methyl-5,10-dioxo-3,4-dihydro-1H-benzogliso chromen-3-yl)acetate                                                              | [M+H] <sup>+</sup>   | 339.08389 | C17H16O6     | Benzoisochromanequinones                   | FMEUW1KCS1JB-UHFFFAOYSA-N    | O=C(OC)CC1OC(C=2C(O)=C3C(O)=CC=CC3(=O)C2C1)C                                                                           |
| 1692 | 5.729 | 881.39075 | 3-[(3S,10S,13R)-14-hydroxy-3-[4-methoxy-6-methyl-5-[3,4,5-trihydroxy-6-[[3,4,5-trihydroxy-6-(hydroxymethyl)oxan-2-yl]oxy)methyl]oxan-2-yl]oxyoxan-  | [M+H] <sup>+</sup>   | 881.39313 | C42H66O17    | Cardenolide glycosides and derivatives     | 1TKDSJDYFJAVTJ-BMRHGRNRS-N   | O=C1OCC(=C1)C2CC3(CO)C4CC5C5C(=O)OC(CO)C(OC7OC(COC8OC(CO)C(CO)C8O)C(CO)C(CO)C7O)C(CO)C3(CO)C(CO)C2(CO)C1C              |
| 1693 | 5.73  | 289.08957 | (2S,3S)-2-(3,4-dihydroxyphenyl)-3,7-dihydroxy-2,3-dihydrochromen-4-one                                                                              | [M+2H] <sup>2+</sup> | 289.08755 | C15H12O6     | Flavanonols                                | FNUPYFWXZM1E-CABCYRRESA-N    | O=C1C2=CC=C(CO)C=C2OC(C3=CC=C(CO)C(CO)=C3)C1O                                                                          |
| 1694 | 5.732 | 290.08984 | (2R,3R,4S,5R)-2-(6-amino-9H-purin-9-yl)-5-(hydroxymethyl)tetrahydrofuran-3,4-diol                                                                   | [M+2H] <sup>2+</sup> | 290.09    | C10H13N5O4   | Purine nucleosides                         | O1RDTQYTFABQOQ-KQYNXCUSA-N   | OC1OC(N2C=NC=NC(=NC(N3C2)N)C(CO)C1O                                                                                    |
| 1695 | 5.732 | 879.37732 | [(2R,3R,4R,5R,6S)-6-[(6E)-3,7-dimethyl-8-oxo-8-[(2S,3R,4S,5S,6R)-3,4,5-trihydroxy-6-(hydroxymethyl)oxan-2-yl]oxoacetal-1,6-dien-3-yl]oxy-5-hydroxy- | [M+H] <sup>+</sup>   | 879.3775  | C42H64O17    | Saccharolipids                             | O1MSOLEDHKDCY-WJHJMGTLA-N    | O=C(OC1OC(CO)C(O)C(O)C1O)C(=CCCC(OC2OC(CO)C(OC(=O)C(=C(CCC(OC(CO)C8O)C(CO)C(CO)C8)C(CO)C(CO)C7O)C(CO)C(CO)C7O)C(CO)C1C |
| 1696 | 5.732 | 325.9588  | Bifenox free acid                                                                                                                                   | [M-H] <sup>-</sup>   | 325.96286 | C13H7Cl2NO5  | Diphenylethers                             | IUSYSZLVZMUVD-UHFFFAOYSA-N   | C1=CC(=C(C=C1C1)C1)OC=                                                                                                 |

|      |       |           |                                                                                                                                |        |           |              |                                              |                              |                                                                                                                                                                                                                                                                                                                                                                                                                                                                                                                                                                                                                                                                                                                                                                                                                                                                                                                                                                                                                                                                                                                                                                                                                                                                                                                                                                                                                                                                                                                                                                                                                                                                                                                                                                                                                                                                                                                                                                                                                                                                                                                                                                                                                                                                                                                                                                                                                                                                                                                                                                                                                                                                                                                                                                                                                                                                                                                                                                                                                                                                                                                                                                                                                                                                                                                                                                                                                                                                                                                                                                                                                                                                                                                                                                                                                                                                                                                                                                                                                                                                                                                                                                                                                                                                                                                                                                                                                                                                                                                                                                                                                                                                                                                                                                                                                                                                                                                                                                                                                                                                |
|------|-------|-----------|--------------------------------------------------------------------------------------------------------------------------------|--------|-----------|--------------|----------------------------------------------|------------------------------|----------------------------------------------------------------------------------------------------------------------------------------------------------------------------------------------------------------------------------------------------------------------------------------------------------------------------------------------------------------------------------------------------------------------------------------------------------------------------------------------------------------------------------------------------------------------------------------------------------------------------------------------------------------------------------------------------------------------------------------------------------------------------------------------------------------------------------------------------------------------------------------------------------------------------------------------------------------------------------------------------------------------------------------------------------------------------------------------------------------------------------------------------------------------------------------------------------------------------------------------------------------------------------------------------------------------------------------------------------------------------------------------------------------------------------------------------------------------------------------------------------------------------------------------------------------------------------------------------------------------------------------------------------------------------------------------------------------------------------------------------------------------------------------------------------------------------------------------------------------------------------------------------------------------------------------------------------------------------------------------------------------------------------------------------------------------------------------------------------------------------------------------------------------------------------------------------------------------------------------------------------------------------------------------------------------------------------------------------------------------------------------------------------------------------------------------------------------------------------------------------------------------------------------------------------------------------------------------------------------------------------------------------------------------------------------------------------------------------------------------------------------------------------------------------------------------------------------------------------------------------------------------------------------------------------------------------------------------------------------------------------------------------------------------------------------------------------------------------------------------------------------------------------------------------------------------------------------------------------------------------------------------------------------------------------------------------------------------------------------------------------------------------------------------------------------------------------------------------------------------------------------------------------------------------------------------------------------------------------------------------------------------------------------------------------------------------------------------------------------------------------------------------------------------------------------------------------------------------------------------------------------------------------------------------------------------------------------------------------------------------------------------------------------------------------------------------------------------------------------------------------------------------------------------------------------------------------------------------------------------------------------------------------------------------------------------------------------------------------------------------------------------------------------------------------------------------------------------------------------------------------------------------------------------------------------------------------------------------------------------------------------------------------------------------------------------------------------------------------------------------------------------------------------------------------------------------------------------------------------------------------------------------------------------------------------------------------------------------------------------------------------------------------------------------------------|
| 1719 | 5.897 | 238.10706 | Bupropion                                                                                                                      | [M-H]- | 238.10042 | C13H18ClNO   | Alkyl-phenylketones                          | SNNPWTUOZRMVNY-UHHFFAONYA-N  | O=C(C(=C=CC=C(C1)C)(NC(C)(C)C)C                                                                                                                                                                                                                                                                                                                                                                                                                                                                                                                                                                                                                                                                                                                                                                                                                                                                                                                                                                                                                                                                                                                                                                                                                                                                                                                                                                                                                                                                                                                                                                                                                                                                                                                                                                                                                                                                                                                                                                                                                                                                                                                                                                                                                                                                                                                                                                                                                                                                                                                                                                                                                                                                                                                                                                                                                                                                                                                                                                                                                                                                                                                                                                                                                                                                                                                                                                                                                                                                                                                                                                                                                                                                                                                                                                                                                                                                                                                                                                                                                                                                                                                                                                                                                                                                                                                                                                                                                                                                                                                                                                                                                                                                                                                                                                                                                                                                                                                                                                                                                                |
| 1720 | 5.899 | 542.33514 | (3E,7E,11E,15E)-5,9,13,17,18-pentahydroxy-4,6,8,10-tetramethyl-2-[(E)-2-methylbut-2-enyl]nonadeca-3,7,11,15-tetraenedioic acid | [M-H]+ | 542.33234 | C28H44O9     | Very long-chain fatty acids                  | YKAENKKQWMYF-SLELSECNSA-N    | O=C(O)C(O)C(O)C(OC)=CC(C)C(O)C(=CC(C)C)C(O)C(=CC(C(=O)OC)=CC(C)C)C                                                                                                                                                                                                                                                                                                                                                                                                                                                                                                                                                                                                                                                                                                                                                                                                                                                                                                                                                                                                                                                                                                                                                                                                                                                                                                                                                                                                                                                                                                                                                                                                                                                                                                                                                                                                                                                                                                                                                                                                                                                                                                                                                                                                                                                                                                                                                                                                                                                                                                                                                                                                                                                                                                                                                                                                                                                                                                                                                                                                                                                                                                                                                                                                                                                                                                                                                                                                                                                                                                                                                                                                                                                                                                                                                                                                                                                                                                                                                                                                                                                                                                                                                                                                                                                                                                                                                                                                                                                                                                                                                                                                                                                                                                                                                                                                                                                                                                                                                                                             |
| 1721 | 5.939 | 296.10309 | 1-Methylguanosine                                                                                                              | [M-H]- | 296.10004 | C11H15N5O5   | Purine nucleosides                           | UTAITYHAJNQDW-UHHFFAONYA-N   | O=C1C=2N=C(C2NC(N)N1C)C3OC(CO)C(O)C3O                                                                                                                                                                                                                                                                                                                                                                                                                                                                                                                                                                                                                                                                                                                                                                                                                                                                                                                                                                                                                                                                                                                                                                                                                                                                                                                                                                                                                                                                                                                                                                                                                                                                                                                                                                                                                                                                                                                                                                                                                                                                                                                                                                                                                                                                                                                                                                                                                                                                                                                                                                                                                                                                                                                                                                                                                                                                                                                                                                                                                                                                                                                                                                                                                                                                                                                                                                                                                                                                                                                                                                                                                                                                                                                                                                                                                                                                                                                                                                                                                                                                                                                                                                                                                                                                                                                                                                                                                                                                                                                                                                                                                                                                                                                                                                                                                                                                                                                                                                                                                          |
| 1722 | 5.941 | 213.0648  | 3-(2-hydroxyethyl)quinazolin-4(3H)-one                                                                                         | [M-H]+ | 213.06    | C10H10N2O2   | Quinazolines                                 | OCFLUNGSKQZSJ-UHHFFAONYA-N   | O=C1C=2C=CC=CC2N=CN1COO                                                                                                                                                                                                                                                                                                                                                                                                                                                                                                                                                                                                                                                                                                                                                                                                                                                                                                                                                                                                                                                                                                                                                                                                                                                                                                                                                                                                                                                                                                                                                                                                                                                                                                                                                                                                                                                                                                                                                                                                                                                                                                                                                                                                                                                                                                                                                                                                                                                                                                                                                                                                                                                                                                                                                                                                                                                                                                                                                                                                                                                                                                                                                                                                                                                                                                                                                                                                                                                                                                                                                                                                                                                                                                                                                                                                                                                                                                                                                                                                                                                                                                                                                                                                                                                                                                                                                                                                                                                                                                                                                                                                                                                                                                                                                                                                                                                                                                                                                                                                                                        |
| 1723 | 5.941 | 284.05457 | Cladribine                                                                                                                     | [M-H]- | 284.0556  | C10H12ClN5O3 | Purine 2'-deoxynucleosides                   | PTOARAEWMLNO-UHHFFAONYA-N    | C1C=1N=C(N)C=2N=C(C2N1)C3OC(CO)C(O)C3                                                                                                                                                                                                                                                                                                                                                                                                                                                                                                                                                                                                                                                                                                                                                                                                                                                                                                                                                                                                                                                                                                                                                                                                                                                                                                                                                                                                                                                                                                                                                                                                                                                                                                                                                                                                                                                                                                                                                                                                                                                                                                                                                                                                                                                                                                                                                                                                                                                                                                                                                                                                                                                                                                                                                                                                                                                                                                                                                                                                                                                                                                                                                                                                                                                                                                                                                                                                                                                                                                                                                                                                                                                                                                                                                                                                                                                                                                                                                                                                                                                                                                                                                                                                                                                                                                                                                                                                                                                                                                                                                                                                                                                                                                                                                                                                                                                                                                                                                                                                                          |
| 1724 | 5.943 | 285.03915 | 3',4',5,7-tetrahydroflavone                                                                                                    | [M-H]- | 285.04047 | C15H10O6     | Flavones                                     | JPNAAANSBPFGQ-UHHFFAONYA-N   | O=C1C=C(OC=2C(C)C)C(C)C12=C=3C=CC(O)=C(O)C3                                                                                                                                                                                                                                                                                                                                                                                                                                                                                                                                                                                                                                                                                                                                                                                                                                                                                                                                                                                                                                                                                                                                                                                                                                                                                                                                                                                                                                                                                                                                                                                                                                                                                                                                                                                                                                                                                                                                                                                                                                                                                                                                                                                                                                                                                                                                                                                                                                                                                                                                                                                                                                                                                                                                                                                                                                                                                                                                                                                                                                                                                                                                                                                                                                                                                                                                                                                                                                                                                                                                                                                                                                                                                                                                                                                                                                                                                                                                                                                                                                                                                                                                                                                                                                                                                                                                                                                                                                                                                                                                                                                                                                                                                                                                                                                                                                                                                                                                                                                                                    |
| 1725 | 5.947 | 562.35303 | (6aR,8aS)-10-(4-(N-acetylacetamido)-3-methylbutyl)-6a,8a,9-trimethyl-3,4,5,6,6a,6b,7,8,8a,8b,11a,12,12a,12b-tetradecahydro-1H- | [M-H]+ | 562.34998 | C33H49NO6    | Furostanes and derivatives                   | WURLGASLEZVNHV-PLECQWPSA-N   | O=C(O)CC1CC2=CC3C(CCC4(C)C5C(=C(OC5CC34))CCC(C)CN(C)=O)C1C=C1C(C)C(C)C2(C)C(C)C1C                                                                                                                                                                                                                                                                                                                                                                                                                                                                                                                                                                                                                                                                                                                                                                                                                                                                                                                                                                                                                                                                                                                                                                                                                                                                                                                                                                                                                                                                                                                                                                                                                                                                                                                                                                                                                                                                                                                                                                                                                                                                                                                                                                                                                                                                                                                                                                                                                                                                                                                                                                                                                                                                                                                                                                                                                                                                                                                                                                                                                                                                                                                                                                                                                                                                                                                                                                                                                                                                                                                                                                                                                                                                                                                                                                                                                                                                                                                                                                                                                                                                                                                                                                                                                                                                                                                                                                                                                                                                                                                                                                                                                                                                                                                                                                                                                                                                                                                                                                              |
| 1726 | 5.954 | 425.20551 | Benazepril hydrochloride                                                                                                       | [M-H]+ | 425.207   | C24H29ClN2O5 | Dipeptides                                   | VPSRQEHTIMQM-FKLPMAJSA-N     | C1.O=C(O)CN1C(=O)C(NC(=O)OC)CCC=2C=CC=CC2.CCC=3C=CC=CC3                                                                                                                                                                                                                                                                                                                                                                                                                                                                                                                                                                                                                                                                                                                                                                                                                                                                                                                                                                                                                                                                                                                                                                                                                                                                                                                                                                                                                                                                                                                                                                                                                                                                                                                                                                                                                                                                                                                                                                                                                                                                                                                                                                                                                                                                                                                                                                                                                                                                                                                                                                                                                                                                                                                                                                                                                                                                                                                                                                                                                                                                                                                                                                                                                                                                                                                                                                                                                                                                                                                                                                                                                                                                                                                                                                                                                                                                                                                                                                                                                                                                                                                                                                                                                                                                                                                                                                                                                                                                                                                                                                                                                                                                                                                                                                                                                                                                                                                                                                                                        |
| 1727 | 5.954 | 268.11746 | Citrinin                                                                                                                       | [M-H]+ | 268.11795 | C13H14O5     | Benzopyrans                                  | CQUIUKYOEOPUDV-IYSWYEDSA-N   | O=C(O)C(=C(=O)C)=C2C(=C(C)C(C)C2)C1O)C                                                                                                                                                                                                                                                                                                                                                                                                                                                                                                                                                                                                                                                                                                                                                                                                                                                                                                                                                                                                                                                                                                                                                                                                                                                                                                                                                                                                                                                                                                                                                                                                                                                                                                                                                                                                                                                                                                                                                                                                                                                                                                                                                                                                                                                                                                                                                                                                                                                                                                                                                                                                                                                                                                                                                                                                                                                                                                                                                                                                                                                                                                                                                                                                                                                                                                                                                                                                                                                                                                                                                                                                                                                                                                                                                                                                                                                                                                                                                                                                                                                                                                                                                                                                                                                                                                                                                                                                                                                                                                                                                                                                                                                                                                                                                                                                                                                                                                                                                                                                                         |
| 1728 | 5.979 | 393.16168 | Corynanthin                                                                                                                    | [M-H]+ | 393.1575  | C21H26N2O3   | Yohimbine alkaloids                          | BLGFXZZNTWLAY-UHHFFAONYA-N   | O=C(O)C(C)C1C(O)CC2CN3CCC=4C=SC=CC5N4C3CC12                                                                                                                                                                                                                                                                                                                                                                                                                                                                                                                                                                                                                                                                                                                                                                                                                                                                                                                                                                                                                                                                                                                                                                                                                                                                                                                                                                                                                                                                                                                                                                                                                                                                                                                                                                                                                                                                                                                                                                                                                                                                                                                                                                                                                                                                                                                                                                                                                                                                                                                                                                                                                                                                                                                                                                                                                                                                                                                                                                                                                                                                                                                                                                                                                                                                                                                                                                                                                                                                                                                                                                                                                                                                                                                                                                                                                                                                                                                                                                                                                                                                                                                                                                                                                                                                                                                                                                                                                                                                                                                                                                                                                                                                                                                                                                                                                                                                                                                                                                                                                    |
| 1729 | 5.979 | 415.31894 | diosgenin                                                                                                                      | [M-H]+ | 415.32001 | C27H42O3     | Triterpenoids                                | WQLVFSAGJTQC-KVROHFGNSA-N    | OC1CC2=CC3C(CCC4(C)C3CC5OC6(OC(C)OC6(C)C54)C2(C)CC1                                                                                                                                                                                                                                                                                                                                                                                                                                                                                                                                                                                                                                                                                                                                                                                                                                                                                                                                                                                                                                                                                                                                                                                                                                                                                                                                                                                                                                                                                                                                                                                                                                                                                                                                                                                                                                                                                                                                                                                                                                                                                                                                                                                                                                                                                                                                                                                                                                                                                                                                                                                                                                                                                                                                                                                                                                                                                                                                                                                                                                                                                                                                                                                                                                                                                                                                                                                                                                                                                                                                                                                                                                                                                                                                                                                                                                                                                                                                                                                                                                                                                                                                                                                                                                                                                                                                                                                                                                                                                                                                                                                                                                                                                                                                                                                                                                                                                                                                                                                                            |
| 1730 | 5.982 | 577.36346 | Polyphyllin A                                                                                                                  | [M-H]+ | 577.37    | C33H52O8     | Steroidal saponins                           | WXMARHXAKWRND-GAMIEDRGS-N    | OC1OC10C2CC3=CC4C(CCC5(C)C4CC6OC7(OC(C)C(C)C(C)C65)C3(C)C2)C(C)C(C)C1O                                                                                                                                                                                                                                                                                                                                                                                                                                                                                                                                                                                                                                                                                                                                                                                                                                                                                                                                                                                                                                                                                                                                                                                                                                                                                                                                                                                                                                                                                                                                                                                                                                                                                                                                                                                                                                                                                                                                                                                                                                                                                                                                                                                                                                                                                                                                                                                                                                                                                                                                                                                                                                                                                                                                                                                                                                                                                                                                                                                                                                                                                                                                                                                                                                                                                                                                                                                                                                                                                                                                                                                                                                                                                                                                                                                                                                                                                                                                                                                                                                                                                                                                                                                                                                                                                                                                                                                                                                                                                                                                                                                                                                                                                                                                                                                                                                                                                                                                                                                         |
| 1731 | 5.988 | 317.06497 | 3-O-methylquercetin                                                                                                            | [M-H]+ | 317.065   | C16H12O7     | 3-O-methylated flavonoids                    | WEPPBGSIAWZTEJR-UHHFFAONYA-N | O=C1C(OC)=C(CC=2C(C)C)C(C)C12=C=3C=CC(O)=C(O)C3                                                                                                                                                                                                                                                                                                                                                                                                                                                                                                                                                                                                                                                                                                                                                                                                                                                                                                                                                                                                                                                                                                                                                                                                                                                                                                                                                                                                                                                                                                                                                                                                                                                                                                                                                                                                                                                                                                                                                                                                                                                                                                                                                                                                                                                                                                                                                                                                                                                                                                                                                                                                                                                                                                                                                                                                                                                                                                                                                                                                                                                                                                                                                                                                                                                                                                                                                                                                                                                                                                                                                                                                                                                                                                                                                                                                                                                                                                                                                                                                                                                                                                                                                                                                                                                                                                                                                                                                                                                                                                                                                                                                                                                                                                                                                                                                                                                                                                                                                                                                                |
| 1732 | 6.001 | 464.09738 | Delphinidin-3-glucoside                                                                                                        | [M-H]- | 464.09549 | C21H21O12    | Anthocyanidin-3-O-glycosides                 | XENHPQLDPAYIJ-UHHFFAONYA-O   | OC=1C=C(C)C=2C=C(OC3OC(C)C(O)C(C)C3O)C(=[O+])C2(C)C=4C=C(C)C(O)=C(O)C4                                                                                                                                                                                                                                                                                                                                                                                                                                                                                                                                                                                                                                                                                                                                                                                                                                                                                                                                                                                                                                                                                                                                                                                                                                                                                                                                                                                                                                                                                                                                                                                                                                                                                                                                                                                                                                                                                                                                                                                                                                                                                                                                                                                                                                                                                                                                                                                                                                                                                                                                                                                                                                                                                                                                                                                                                                                                                                                                                                                                                                                                                                                                                                                                                                                                                                                                                                                                                                                                                                                                                                                                                                                                                                                                                                                                                                                                                                                                                                                                                                                                                                                                                                                                                                                                                                                                                                                                                                                                                                                                                                                                                                                                                                                                                                                                                                                                                                                                                                                         |
| 1733 | 6.004 | 251.16333 | 2-[(1S,2S,4aR,8aS)-1-hydroxy-1a-methyl-8-methylenedioxy-1,2,3,4,5,6,7,8a-octahydronaphthalen-2-yl]irono-2-enoic acid           | [M-H]+ | 251.16417 | C15H22O3     | Eudesmane, Isoeudesmane or cycloisoeudesmane | QTSGCVLTMMKDP-SFDCRBFBSA-N   | O=C(O)C(C=C)CCCC(C)CCCC(=O)C2C1O                                                                                                                                                                                                                                                                                                                                                                                                                                                                                                                                                                                                                                                                                                                                                                                                                                                                                                                                                                                                                                                                                                                                                                                                                                                                                                                                                                                                                                                                                                                                                                                                                                                                                                                                                                                                                                                                                                                                                                                                                                                                                                                                                                                                                                                                                                                                                                                                                                                                                                                                                                                                                                                                                                                                                                                                                                                                                                                                                                                                                                                                                                                                                                                                                                                                                                                                                                                                                                                                                                                                                                                                                                                                                                                                                                                                                                                                                                                                                                                                                                                                                                                                                                                                                                                                                                                                                                                                                                                                                                                                                                                                                                                                                                                                                                                                                                                                                                                                                                                                                               |
| 1734 | 6.005 | 270.11206 | (2Z)-2-benzylidene-6-methoxy-1-benzofuran-3(2H)-one                                                                            | [M-H]+ | 270.11246 | C16H12O3     | Aurene flavonoids                            | LKWJJGLULNRBP-DHDCSXOGS-N    | O=C1C(OC2=CC(OC)=CC2C1)=CC=3C=CC=CC3                                                                                                                                                                                                                                                                                                                                                                                                                                                                                                                                                                                                                                                                                                                                                                                                                                                                                                                                                                                                                                                                                                                                                                                                                                                                                                                                                                                                                                                                                                                                                                                                                                                                                                                                                                                                                                                                                                                                                                                                                                                                                                                                                                                                                                                                                                                                                                                                                                                                                                                                                                                                                                                                                                                                                                                                                                                                                                                                                                                                                                                                                                                                                                                                                                                                                                                                                                                                                                                                                                                                                                                                                                                                                                                                                                                                                                                                                                                                                                                                                                                                                                                                                                                                                                                                                                                                                                                                                                                                                                                                                                                                                                                                                                                                                                                                                                                                                                                                                                                                                           |
| 1735 | 6.005 | 297.06497 | (5E)-4-methoxy-5-[methoxy{1(2R,3S)-3-phenyloxiran-2-yl)methylenedioxy}furan-2-one                                              | [M-H]+ | 297.06296 | C15H14O5     | Butenolides                                  | RTNGMUTUMJOABT-ONKYJICLSA-N  | O=C1OC(C(OC)=C1)C(OC)C2OC2=3C=CC=CC2                                                                                                                                                                                                                                                                                                                                                                                                                                                                                                                                                                                                                                                                                                                                                                                                                                                                                                                                                                                                                                                                                                                                                                                                                                                                                                                                                                                                                                                                                                                                                                                                                                                                                                                                                                                                                                                                                                                                                                                                                                                                                                                                                                                                                                                                                                                                                                                                                                                                                                                                                                                                                                                                                                                                                                                                                                                                                                                                                                                                                                                                                                                                                                                                                                                                                                                                                                                                                                                                                                                                                                                                                                                                                                                                                                                                                                                                                                                                                                                                                                                                                                                                                                                                                                                                                                                                                                                                                                                                                                                                                                                                                                                                                                                                                                                                                                                                                                                                                                                                                           |
| 1736 | 6.007 | 301.06006 | Carbazochrome sulfonate                                                                                                        | [M-H]+ | 301.06012 | C10H12NaO5S  | Indole and derivatives                       | OZCACMPSTYSQM-UHHFFAONYA-N   | CN1C(CC2=CC(NNC(O)=N)C(C)=O)C(C)S12(O)=O                                                                                                                                                                                                                                                                                                                                                                                                                                                                                                                                                                                                                                                                                                                                                                                                                                                                                                                                                                                                                                                                                                                                                                                                                                                                                                                                                                                                                                                                                                                                                                                                                                                                                                                                                                                                                                                                                                                                                                                                                                                                                                                                                                                                                                                                                                                                                                                                                                                                                                                                                                                                                                                                                                                                                                                                                                                                                                                                                                                                                                                                                                                                                                                                                                                                                                                                                                                                                                                                                                                                                                                                                                                                                                                                                                                                                                                                                                                                                                                                                                                                                                                                                                                                                                                                                                                                                                                                                                                                                                                                                                                                                                                                                                                                                                                                                                                                                                                                                                                                                       |
| 1737 | 6.008 | 537.15936 | (1S,4aS,7r,8aS)-7-hydroxy-7-[[1(E)-3-(4-hydroxyphenyl)prop-2-enoyl]oxymethyl]-1-[(2S,3R,4S,5S,6R)-3,4,5-trihydroxy-6-          | [M-H]+ | 537.16028 | C25H28O13    | Iridoid O-glycosides                         | WIJPBKJNJIZGY-QZOILURDPSA-N  | O=C(O)C1=CC(OC2OC(C)C(O)C(C)C2O)C3C1C=CC3(O)CC(=O)C=C(C)C=C(C)C(C)C4                                                                                                                                                                                                                                                                                                                                                                                                                                                                                                                                                                                                                                                                                                                                                                                                                                                                                                                                                                                                                                                                                                                                                                                                                                                                                                                                                                                                                                                                                                                                                                                                                                                                                                                                                                                                                                                                                                                                                                                                                                                                                                                                                                                                                                                                                                                                                                                                                                                                                                                                                                                                                                                                                                                                                                                                                                                                                                                                                                                                                                                                                                                                                                                                                                                                                                                                                                                                                                                                                                                                                                                                                                                                                                                                                                                                                                                                                                                                                                                                                                                                                                                                                                                                                                                                                                                                                                                                                                                                                                                                                                                                                                                                                                                                                                                                                                                                                                                                                                                           |
| 1738 | 6.008 | 283.26233 | Oleic acid                                                                                                                     | [M-H]+ | 283.26401 | C18H34O2     | Long-chain fatty acids                       | ZGPPMHWFCSIRJ-MDZMXPLPSA-N   | O=C(O)CCCCCCCC=CCCCCCCCCC                                                                                                                                                                                                                                                                                                                                                                                                                                                                                                                                                                                                                                                                                                                                                                                                                                                                                                                                                                                                                                                                                                                                                                                                                                                                                                                                                                                                                                                                                                                                                                                                                                                                                                                                                                                                                                                                                                                                                                                                                                                                                                                                                                                                                                                                                                                                                                                                                                                                                                                                                                                                                                                                                                                                                                                                                                                                                                                                                                                                                                                                                                                                                                                                                                                                                                                                                                                                                                                                                                                                                                                                                                                                                                                                                                                                                                                                                                                                                                                                                                                                                                                                                                                                                                                                                                                                                                                                                                                                                                                                                                                                                                                                                                                                                                                                                                                                                                                                                                                                                                      |
| 1739 | 6.018 | 201.1127  | Sebacic acid                                                                                                                   | [M-H]- | 201.11324 | C10H18O4     | Medium-chain fatty acids                     | CXMXPHRMRROMY-UHHFFAONYA-N   | OC(=O)CCCCCCCC(=O)=O                                                                                                                                                                                                                                                                                                                                                                                                                                                                                                                                                                                                                                                                                                                                                                                                                                                                                                                                                                                                                                                                                                                                                                                                                                                                                                                                                                                                                                                                                                                                                                                                                                                                                                                                                                                                                                                                                                                                                                                                                                                                                                                                                                                                                                                                                                                                                                                                                                                                                                                                                                                                                                                                                                                                                                                                                                                                                                                                                                                                                                                                                                                                                                                                                                                                                                                                                                                                                                                                                                                                                                                                                                                                                                                                                                                                                                                                                                                                                                                                                                                                                                                                                                                                                                                                                                                                                                                                                                                                                                                                                                                                                                                                                                                                                                                                                                                                                                                                                                                                                                           |
| 1740 | 6.019 | 301.03595 | Ellagic Acid                                                                                                                   | [M-H]- | 301.03583 | C14H6O8      | Hydrolysable tannins                         | AFSDNFLWKVMVB-UHHFFAONYA-N   | O=C1OC2=C(O)C(O)=CC=3C(=O)C(=O)C(=O)C=C1C4C23                                                                                                                                                                                                                                                                                                                                                                                                                                                                                                                                                                                                                                                                                                                                                                                                                                                                                                                                                                                                                                                                                                                                                                                                                                                                                                                                                                                                                                                                                                                                                                                                                                                                                                                                                                                                                                                                                                                                                                                                                                                                                                                                                                                                                                                                                                                                                                                                                                                                                                                                                                                                                                                                                                                                                                                                                                                                                                                                                                                                                                                                                                                                                                                                                                                                                                                                                                                                                                                                                                                                                                                                                                                                                                                                                                                                                                                                                                                                                                                                                                                                                                                                                                                                                                                                                                                                                                                                                                                                                                                                                                                                                                                                                                                                                                                                                                                                                                                                                                                                                  |
| 1741 | 6.021 | 581.14795 | Flavanone base + 40, O-Hex, C-Pen                                                                                              | [M-H]- | 581.15021 | C26H30O15    | Flavanone C,O-glycosides                     | QETQGQBDBULWC-UHHFFAONYA-N   | OC1OC(OC2=CC(O)=C(C3OC(C)C(O)C(C)C3O)C3=C2C(=O)CC(C)C2)=CC(O)=C(O)C(C)C(C)C1O                                                                                                                                                                                                                                                                                                                                                                                                                                                                                                                                                                                                                                                                                                                                                                                                                                                                                                                                                                                                                                                                                                                                                                                                                                                                                                                                                                                                                                                                                                                                                                                                                                                                                                                                                                                                                                                                                                                                                                                                                                                                                                                                                                                                                                                                                                                                                                                                                                                                                                                                                                                                                                                                                                                                                                                                                                                                                                                                                                                                                                                                                                                                                                                                                                                                                                                                                                                                                                                                                                                                                                                                                                                                                                                                                                                                                                                                                                                                                                                                                                                                                                                                                                                                                                                                                                                                                                                                                                                                                                                                                                                                                                                                                                                                                                                                                                                                                                                                                                                  |
| 1742 | 6.024 | 579.35144 | (1S,2S,5R,7R,10S,11S,14R,16R,19S,20S,23R,25R)-5,14-diethyl-2,11,20,23-tetramethyl-4,13,22,28,29,30-                            | [M-H]- | 579.35382 | C32H52O9     | Macrolides and analogues                     | MXXZIBZNZOHER-VHWZAHMSA-N    | O=C1OC(C)CC2OC(C2)C(C)=O(C(C)C(C)C3OC(C)C(C)=O)OC(C(C)CC4OC(C4)C)C1C                                                                                                                                                                                                                                                                                                                                                                                                                                                                                                                                                                                                                                                                                                                                                                                                                                                                                                                                                                                                                                                                                                                                                                                                                                                                                                                                                                                                                                                                                                                                                                                                                                                                                                                                                                                                                                                                                                                                                                                                                                                                                                                                                                                                                                                                                                                                                                                                                                                                                                                                                                                                                                                                                                                                                                                                                                                                                                                                                                                                                                                                                                                                                                                                                                                                                                                                                                                                                                                                                                                                                                                                                                                                                                                                                                                                                                                                                                                                                                                                                                                                                                                                                                                                                                                                                                                                                                                                                                                                                                                                                                                                                                                                                                                                                                                                                                                                                                                                                                                           |
| 1743 | 6.024 | 527.26678 | 3Beta-Acetoxydeoxydihydrogedunin                                                                                               | [M-H]- | 527.26721 | C30H40O8     | Limonoids                                    | LCTHUKJMKQYDV-ZYIGBFLPSA-N   | O=C(OC1CC2(C)C(C)C(C)C2O)C3OC(=O)C5OC54C3(C)C(OC(=O)C)CC2(C)C(C)C6=OOC(C6)C                                                                                                                                                                                                                                                                                                                                                                                                                                                                                                                                                                                                                                                                                                                                                                                                                                                                                                                                                                                                                                                                                                                                                                                                                                                                                                                                                                                                                                                                                                                                                                                                                                                                                                                                                                                                                                                                                                                                                                                                                                                                                                                                                                                                                                                                                                                                                                                                                                                                                                                                                                                                                                                                                                                                                                                                                                                                                                                                                                                                                                                                                                                                                                                                                                                                                                                                                                                                                                                                                                                                                                                                                                                                                                                                                                                                                                                                                                                                                                                                                                                                                                                                                                                                                                                                                                                                                                                                                                                                                                                                                                                                                                                                                                                                                                                                                                                                                                                                                                                    |
| 1744 | 6.03  | 375.10605 | 2-(3,4-dimethoxyphenyl)-5,7-dihydroxy-3,6-dimethoxy-4H-chromen-4-one                                                           | [M-H]+ | 375.10699 | C19H18O8     | 6-O-methylated flavonoids                    | SDTFURCSWUESP-UHHFFAONYA-N   | O=C1C(OC)=C(OC2=CC(O)=C(CO)C(OC)=C12)C=3C=CC(OC)=C(OC)C3                                                                                                                                                                                                                                                                                                                                                                                                                                                                                                                                                                                                                                                                                                                                                                                                                                                                                                                                                                                                                                                                                                                                                                                                                                                                                                                                                                                                                                                                                                                                                                                                                                                                                                                                                                                                                                                                                                                                                                                                                                                                                                                                                                                                                                                                                                                                                                                                                                                                                                                                                                                                                                                                                                                                                                                                                                                                                                                                                                                                                                                                                                                                                                                                                                                                                                                                                                                                                                                                                                                                                                                                                                                                                                                                                                                                                                                                                                                                                                                                                                                                                                                                                                                                                                                                                                                                                                                                                                                                                                                                                                                                                                                                                                                                                                                                                                                                                                                                                                                                       |
| 1745 | 6.03  | 487.25217 | Alpha-Dihydrogedunol                                                                                                           | [M-H]+ | 487.25009 | C28H38O7     | Limonoids                                    | JVHWYVNBMTROCV-AJIGNVKSA-N   | O=C(OC1CC2C(C)C(C)C(O)CC2(C)C3CC4(C)C(C)OC(=O)C5OC54C13(C)C6=OOC(C6)C                                                                                                                                                                                                                                                                                                                                                                                                                                                                                                                                                                                                                                                                                                                                                                                                                                                                                                                                                                                                                                                                                                                                                                                                                                                                                                                                                                                                                                                                                                                                                                                                                                                                                                                                                                                                                                                                                                                                                                                                                                                                                                                                                                                                                                                                                                                                                                                                                                                                                                                                                                                                                                                                                                                                                                                                                                                                                                                                                                                                                                                                                                                                                                                                                                                                                                                                                                                                                                                                                                                                                                                                                                                                                                                                                                                                                                                                                                                                                                                                                                                                                                                                                                                                                                                                                                                                                                                                                                                                                                                                                                                                                                                                                                                                                                                                                                                                                                                                                                                          |
| 1746 | 6.033 | 491.29947 | caudatin                                                                                                                       | [M-H]+ | 491.29999 | C28H42O7     | Gluco/mineralocorticoids , progestogens and  | VVLXIXALPNYWFH-UVJZLUHSA-N   | O=C(OC1CC2C(O)CC=C3C(O)CC3CC2)C4(O)CCC(O)C(C(=O)C)C14                                                                                                                                                                                                                                                                                                                                                                                                                                                                                                                                                                                                                                                                                                                                                                                                                                                                                                                                                                                                                                                                                                                                                                                                                                                                                                                                                                                                                                                                                                                                                                                                                                                                                                                                                                                                                                                                                                                                                                                                                                                                                                                                                                                                                                                                                                                                                                                                                                                                                                                                                                                                                                                                                                                                                                                                                                                                                                                                                                                                                                                                                                                                                                                                                                                                                                                                                                                                                                                                                                                                                                                                                                                                                                                                                                                                                                                                                                                                                                                                                                                                                                                                                                                                                                                                                                                                                                                                                                                                                                                                                                                                                                                                                                                                                                                                                                                                                                                                                                                                          |
| 1747 | 6.034 | 272.12668 | 3-(alpha, alpha-dimethylallyl)psoralen                                                                                         | [M-H]+ | 272.12811 | C16H14O3     | Psoralens                                    | FVCCUUNGXGKNJV-UHHFFAONYA-N  | O=C1OC=2C=C3OC=C3C=CC2=C1C(C=C)C(C)C                                                                                                                                                                                                                                                                                                                                                                                                                                                                                                                                                                                                                                                                                                                                                                                                                                                                                                                                                                                                                                                                                                                                                                                                                                                                                                                                                                                                                                                                                                                                                                                                                                                                                                                                                                                                                                                                                                                                                                                                                                                                                                                                                                                                                                                                                                                                                                                                                                                                                                                                                                                                                                                                                                                                                                                                                                                                                                                                                                                                                                                                                                                                                                                                                                                                                                                                                                                                                                                                                                                                                                                                                                                                                                                                                                                                                                                                                                                                                                                                                                                                                                                                                                                                                                                                                                                                                                                                                                                                                                                                                                                                                                                                                                                                                                                                                                                                                                                                                                                                                           |
| 1748 | 6.034 | 524.3335  | Phosphatidylcholine lyso 16                                                                                                    | [M-H]- | 524.33575 | C24H48NO7P   | 2-acyl-sn-glycerol-3-phosphocholines         | GMEZONVWDGOWJ-XXVXOECA-N     | CCCCCCCCCCCCC=C/C(OC(=O)OC(CO)OP([O-])([O-])OP([O-])N1C)C(C)C1                                                                                                                                                                                                                                                                                                                                                                                                                                                                                                                                                                                                                                                                                                                                                                                                                                                                                                                                                                                                                                                                                                                                                                                                                                                                                                                                                                                                                                                                                                                                                                                                                                                                                                                                                                                                                                                                                                                                                                                                                                                                                                                                                                                                                                                                                                                                                                                                                                                                                                                                                                                                                                                                                                                                                                                                                                                                                                                                                                                                                                                                                                                                                                                                                                                                                                                                                                                                                                                                                                                                                                                                                                                                                                                                                                                                                                                                                                                                                                                                                                                                                                                                                                                                                                                                                                                                                                                                                                                                                                                                                                                                                                                                                                                                                                                                                                                                                                                                                                                                 |
| 1749 | 6.054 | 453.19968 | 5-[(2R,3S)-6-hydroxy-2-(4-hydroxyphenyl)-4-[(E)-2-(4-hydroxyphenyl)ethenyl]-2,3-dihydro-1-benzofuran-3-yl]benzene-1,3-diol     | [M-H]- | 453.20023 | C28H22O6     | 2-arylbenzofuran flavonoids                  | FQWLMRXWZGLFI-PAKEJIOWSA-N   | OC1=CC=C(C=C1)C=C(C=2C(C)C=C3OC(=O)C4=CC=C(C)C=C4)C(=SC=C(O)C(C)C(C)C5)C32                                                                                                                                                                                                                                                                                                                                                                                                                                                                                                                                                                                                                                                                                                                                                                                                                                                                                                                                                                                                                                                                                                                                                                                                                                                                                                                                                                                                                                                                                                                                                                                                                                                                                                                                                                                                                                                                                                                                                                                                                                                                                                                                                                                                                                                                                                                                                                                                                                                                                                                                                                                                                                                                                                                                                                                                                                                                                                                                                                                                                                                                                                                                                                                                                                                                                                                                                                                                                                                                                                                                                                                                                                                                                                                                                                                                                                                                                                                                                                                                                                                                                                                                                                                                                                                                                                                                                                                                                                                                                                                                                                                                                                                                                                                                                                                                                                                                                                                                                                                     |
| 1750 | 6.057 | 285.08676 | (2R,3R)-3,7-dihydroxy-6-methoxy-2-phenyl-2,3-dihydrochromen-4-one                                                              | [M-H]- | 285.0853  | C16H14O5     | 6-O-methylated flavonoids                    | GLMPFOLJOLXCLA-JKSUJKBHSA-N  | O=C1C2=CC(OC)=C(C)C=C2OC(C=3C=CC=CC3)C1O                                                                                                                                                                                                                                                                                                                                                                                                                                                                                                                                                                                                                                                                                                                                                                                                                                                                                                                                                                                                                                                                                                                                                                                                                                                                                                                                                                                                                                                                                                                                                                                                                                                                                                                                                                                                                                                                                                                                                                                                                                                                                                                                                                                                                                                                                                                                                                                                                                                                                                                                                                                                                                                                                                                                                                                                                                                                                                                                                                                                                                                                                                                                                                                                                                                                                                                                                                                                                                                                                                                                                                                                                                                                                                                                                                                                                                                                                                                                                                                                                                                                                                                                                                                                                                                                                                                                                                                                                                                                                                                                                                                                                                                                                                                                                                                                                                                                                                                                                                                                                       |
| 1751 | 6.071 | 174.08405 | Citrulline                                                                                                                     | [M-H]- | 174.08841 | C6H13N3O3    | L-alpha-amino acids                          | RHGKRLQHDJDR-UHHFFAONYA-N    | O=C(O)C(N)CCNC(=O)O                                                                                                                                                                                                                                                                                                                                                                                                                                                                                                                                                                                                                                                                                                                                                                                                                                                                                                                                                                                                                                                                                                                                                                                                                                                                                                                                                                                                                                                                                                                                                                                                                                                                                                                                                                                                                                                                                                                                                                                                                                                                                                                                                                                                                                                                                                                                                                                                                                                                                                                                                                                                                                                                                                                                                                                                                                                                                                                                                                                                                                                                                                                                                                                                                                                                                                                                                                                                                                                                                                                                                                                                                                                                                                                                                                                                                                                                                                                                                                                                                                                                                                                                                                                                                                                                                                                                                                                                                                                                                                                                                                                                                                                                                                                                                                                                                                                                                                                                                                                                                                            |
| 1752 | 6.085 | 765.43829 | 2-[2-[19-acetamido-6-(3,4-dicarboxybutanoyloxy)-16,18-dihydroxy-5,9-dimethylcosan-7-yl]oxy-2-oxoethyl]butanedioic aci          | [M-H]+ | 765.43793 | C36H61NO15   | Fumonisin                                    | GGCJWFDPDAKUS-UHHFFAONYA-N   | O=C(O)CC(C(=O)C)CC(=O)OC(C)C(C)CCCC(C)CC(C)N(C)C(=O)C(C)C(=O)OC(C(=O)C)C(C)C(C)C(C)C(C)C(C)C(C)C(C)C(C)C(C)C(C)C(C)C(C)C(C)C(C)C(C)C(C)C(C)C(C)C(C)C(C)C(C)C(C)C(C)C(C)C(C)C(C)C(C)C(C)C(C)C(C)C(C)C(C)C(C)C(C)C(C)C(C)C(C)C(C)C(C)C(C)C(C)C(C)C(C)C(C)C(C)C(C)C(C)C(C)C(C)C(C)C(C)C(C)C(C)C(C)C(C)C(C)C(C)C(C)C(C)C(C)C(C)C(C)C(C)C(C)C(C)C(C)C(C)C(C)C(C)C(C)C(C)C(C)C(C)C(C)C(C)C(C)C(C)C(C)C(C)C(C)C(C)C(C)C(C)C(C)C(C)C(C)C(C)C(C)C(C)C(C)C(C)C(C)C(C)C(C)C(C)C(C)C(C)C(C)C(C)C(C)C(C)C(C)C(C)C(C)C(C)C(C)C(C)C(C)C(C)C(C)C(C)C(C)C(C)C(C)C(C)C(C)C(C)C(C)C(C)C(C)C(C)C(C)C(C)C(C)C(C)C(C)C(C)C(C)C(C)C(C)C(C)C(C)C(C)C(C)C(C)C(C)C(C)C(C)C(C)C(C)C(C)C(C)C(C)C(C)C(C)C(C)C(C)C(C)C(C)C(C)C(C)C(C)C(C)C(C)C(C)C(C)C(C)C(C)C(C)C(C)C(C)C(C)C(C)C(C)C(C)C(C)C(C)C(C)C(C)C(C)C(C)C(C)C(C)C(C)C(C)C(C)C(C)C(C)C(C)C(C)C(C)C(C)C(C)C(C)C(C)C(C)C(C)C(C)C(C)C(C)C(C)C(C)C(C)C(C)C(C)C(C)C(C)C(C)C(C)C(C)C(C)C(C)C(C)C(C)C(C)C(C)C(C)C(C)C(C)C(C)C(C)C(C)C(C)C(C)C(C)C(C)C(C)C(C)C(C)C(C)C(C)C(C)C(C)C(C)C(C)C(C)C(C)C(C)C(C)C(C)C(C)C(C)C(C)C(C)C(C)C(C)C(C)C(C)C(C)C(C)C(C)C(C)C(C)C(C)C(C)C(C)C(C)C(C)C(C)C(C)C(C)C(C)C(C)C(C)C(C)C(C)C(C)C(C)C(C)C(C)C(C)C(C)C(C)C(C)C(C)C(C)C(C)C(C)C(C)C(C)C(C)C(C)C(C)C(C)C(C)C(C)C(C)C(C)C(C)C(C)C(C)C(C)C(C)C(C)C(C)C(C)C(C)C(C)C(C)C(C)C(C)C(C)C(C)C(C)C(C)C(C)C(C)C(C)C(C)C(C)C(C)C(C)C(C)C(C)C(C)C(C)C(C)C(C)C(C)C(C)C(C)C(C)C(C)C(C)C(C)C(C)C(C)C(C)C(C)C(C)C(C)C(C)C(C)C(C)C(C)C(C)C(C)C(C)C(C)C(C)C(C)C(C)C(C)C(C)C(C)C(C)C(C)C(C)C(C)C(C)C(C)C(C)C(C)C(C)C(C)C(C)C(C)C(C)C(C)C(C)C(C)C(C)C(C)C(C)C(C)C(C)C(C)C(C)C(C)C(C)C(C)C(C)C(C)C(C)C(C)C(C)C(C)C(C)C(C)C(C)C(C)C(C)C(C)C(C)C(C)C(C)C(C)C(C)C(C)C(C)C(C)C(C)C(C)C(C)C(C)C(C)C(C)C(C)C(C)C(C)C(C)C(C)C(C)C(C)C(C)C(C)C(C)C(C)C(C)C(C)C(C)C(C)C(C)C(C)C(C)C(C)C(C)C(C)C(C)C(C)C(C)C(C)C(C)C(C)C(C)C(C)C(C)C(C)C(C)C(C)C(C)C(C)C(C)C(C)C(C)C(C)C(C)C(C)C(C)C(C)C(C)C(C)C(C)C(C)C(C)C(C)C(C)C(C)C(C)C(C)C(C)C(C)C(C)C(C)C(C)C(C)C(C)C(C)C(C)C(C)C(C)C(C)C(C)C(C)C(C)C(C)C(C)C(C)C(C)C(C)C(C)C(C)C(C)C(C)C(C)C(C)C(C)C(C)C(C)C(C)C(C)C(C)C(C)C(C)C(C)C(C)C(C)C(C)C(C)C(C)C(C)C(C)C(C)C(C)C(C)C(C)C(C)C(C)C(C)C(C)C(C)C(C)C(C)C(C)C(C)C(C)C(C)C(C)C(C)C(C)C(C)C(C)C(C)C(C)C(C)C(C)C(C)C(C)C(C)C(C)C(C)C(C)C(C)C(C)C(C)C(C)C(C)C(C)C(C)C(C)C(C)C(C)C(C)C(C)C(C)C(C)C(C)C(C)C(C)C(C)C(C)C(C)C(C)C(C)C(C)C(C)C(C)C(C)C(C)C(C)C(C)C(C)C(C)C(C)C(C)C(C)C(C)C(C)C(C)C(C)C(C)C(C)C(C)C(C)C(C)C(C)C(C)C(C)C(C)C(C)C(C)C(C)C(C)C(C)C(C)C(C)C(C)C(C)C(C)C(C)C(C)C(C)C(C)C(C)C(C)C(C)C(C)C(C)C(C)C(C)C(C)C(C)C(C)C(C)C(C)C(C)C(C)C(C)C(C)C(C)C(C)C(C)C(C)C(C)C(C)C(C)C(C)C(C)C(C)C(C)C(C)C(C)C(C)C(C)C(C)C(C)C(C)C(C)C(C)C(C)C(C)C(C)C(C)C(C)C(C)C(C)C(C)C(C)C(C)C(C)C(C)C(C)C(C)C(C)C(C)C(C)C(C)C(C)C(C)C(C)C(C)C(C)C(C)C(C)C(C)C(C)C(C)C(C)C(C)C(C)C(C)C(C)C(C)C(C)C(C)C(C)C(C)C(C)C(C)C(C)C(C)C(C)C(C)C(C)C(C)C(C)C(C)C(C)C(C)C(C)C(C)C(C)C(C)C(C)C(C)C(C)C(C)C(C)C(C)C(C)C(C)C(C)C(C)C(C)C(C)C(C)C(C)C(C)C(C)C(C)C(C)C(C)C(C)C(C)C(C)C(C)C(C)C(C)C(C)C(C)C(C)C(C)C(C)C(C)C(C)C(C)C(C)C(C)C(C)C(C)C(C)C(C)C(C)C(C)C(C)C(C)C(C)C(C)C(C)C(C)C(C)C(C)C(C)C(C)C(C)C(C)C(C)C(C)C(C)C(C)C(C)C(C)C(C)C(C)C(C)C(C)C(C)C(C)C(C)C(C)C(C)C(C)C(C)C(C)C(C)C(C)C(C)C(C)C(C)C(C)C(C)C(C)C(C)C(C)C(C)C(C)C(C)C(C)C(C)C(C)C(C)C(C)C(C)C(C)C(C)C(C)C(C)C(C)C(C)C(C)C(C)C(C)C(C)C(C)C(C)C(C)C(C)C(C)C(C)C(C)C(C)C(C)C(C)C(C)C(C)C(C)C(C)C(C)C(C)C(C)C(C)C(C)C(C)C(C)C(C)C(C)C(C)C(C)C(C)C(C)C(C)C(C)C(C)C(C)C(C)C(C)C(C)C(C)C(C)C(C)C(C)C(C)C(C)C(C)C(C)C(C)C(C)C(C)C(C)C(C)C(C)C(C)C(C)C(C)C(C)C(C)C(C)C(C)C(C)C(C)C(C)C(C)C(C)C(C)C(C)C(C)C(C)C(C)C(C)C(C)C(C)C(C)C(C)C(C)C(C)C(C)C(C)C(C)C(C)C(C)C(C)C(C)C(C)C(C)C(C)C(C)C(C)C(C)C(C)C(C)C(C)C(C)C(C)C(C)C(C)C(C)C(C)C(C)C(C)C(C)C(C)C(C)C(C)C(C)C(C)C(C)C(C)C(C)C(C)C(C)C(C)C(C)C(C)C(C)C(C)C(C)C(C)C(C)C(C)C(C)C(C)C(C)C(C)C(C)C(C)C(C)C(C)C(C)C(C)C(C)C(C)C(C)C(C)C(C)C(C)C(C)C(C)C(C)C(C)C(C)C(C)C(C)C(C)C(C)C(C)C(C)C(C)C(C)C(C)C(C)C(C)C(C)C(C)C(C)C(C)C(C)C(C)C(C)C(C)C(C)C(C)C(C)C(C)C(C)C(C)C(C)C(C)C(C)C(C)C(C)C(C)C(C)C(C)C(C)C(C)C(C)C(C)C(C)C(C)C(C)C(C)C(C)C(C)C(C)C(C)C(C)C(C)C(C)C(C)C(C)C(C)C(C)C(C)C(C)C(C)C(C)C(C)C(C)C(C)C(C)C(C)C(C)C(C)C(C)C(C)C(C)C(C)C(C)C(C)C(C)C(C)C(C)C(C)C(C)C(C)C(C)C(C)C(C)C(C)C(C)C(C)C(C)C(C)C(C)C(C)C(C)C(C)C(C)C(C)C(C)C(C)C(C)C(C)C(C)C(C)C(C)C(C)C(C)C(C)C(C)C(C)C(C)C(C)C(C)C(C)C(C)C(C)C(C)C(C)C(C)C(C)C(C)C(C)C(C)C(C)C(C)C(C)C(C)C(C)C(C)C(C)C(C)C(C)C(C)C(C)C(C)C(C)C(C)C(C)C(C)C(C)C(C)C(C)C(C)C(C)C(C)C(C)C(C)C(C)C(C)C(C)C(C)C(C)C(C)C(C)C(C)C(C)C(C)C(C)C(C)C(C)C(C)C(C)C(C)C(C)C(C)C(C)C(C)C(C)C(C)C(C)C(C)C(C)C(C)C(C)C(C)C(C)C(C)C(C)C(C)C(C)C(C)C(C)C(C)C(C)C(C)C(C)C(C)C(C)C(C)C(C)C(C)C(C)C(C)C(C)C(C)C(C)C(C)C(C)C(C)C(C)C(C)C(C)C(C)C(C)C(C)C(C)C(C)C(C)C(C)C(C)C(C)C(C)C(C)C(C)C(C)C(C)C(C)C(C)C(C)C(C)C(C)C(C)C(C)C(C)C(C)C(C)C(C)C(C)C(C)C(C)C(C)C(C)C(C)C(C)C(C)C(C)C(C)C(C)C(C)C(C)C(C)C(C)C(C)C(C)C(C)C(C)C(C)C(C)C(C)C(C)C(C)C(C)C(C)C(C)C(C)C(C)C(C)C(C)C(C)C(C)C(C)C(C)C(C)C(C)C(C)C(C)C(C)C(C)C(C)C(C)C(C)C(C)C(C)C(C)C(C)C(C)C(C)C(C)C(C)C(C)C(C)C(C)C(C)C(C)C(C)C(C)C(C)C(C)C(C)C(C)C(C)C(C)C(C)C(C)C(C)C(C)C(C)C(C)C(C)C(C)C(C)C(C)C(C)C(C)C(C)C(C)C(C |

|      |        |            |                                                                                                                                                                                                                                                                                                                                                 |                    |            |              |                                          |                              |                                                                                                                                          |
|------|--------|------------|-------------------------------------------------------------------------------------------------------------------------------------------------------------------------------------------------------------------------------------------------------------------------------------------------------------------------------------------------|--------------------|------------|--------------|------------------------------------------|------------------------------|------------------------------------------------------------------------------------------------------------------------------------------|
| 1762 | 6. 168 | 357. 09528 | Byakangelicin                                                                                                                                                                                                                                                                                                                                   | [M+H] <sup>+</sup> | 357. 095   | C17H1807     | 5-methoxypsoralens                       | PKRPFNXROFUNDE-LLYKDONJSA-N  | O=C1OC=2C (OCC (O) C (O) C) C=C3OC=CC3=C (OC) C2C=C1                                                                                     |
| 1763 | 6. 169 | 309. 14288 | Biflorin                                                                                                                                                                                                                                                                                                                                        | [M+H] <sup>+</sup> | 309. 14301 | C20H2003     | Naphthoquinones                          | DSVUBIQQVPVZST-UHFFFAOYSA-N  | O=C1C (=O) C (=C2OC=C (C=3C=CC (=C1C23) C) CCC=C (C) C) C                                                                                |
| 1764 | 6. 171 | 343. 21268 | ERGONOINE MALEATE                                                                                                                                                                                                                                                                                                                               | [M+H] <sup>+</sup> | 343. 21283 | C19H23N302   | Lysergamides                             | WVYSZNPYNCNODU-XTQGRXLLSA-N  | OC (=NC (O) C) C1C=C2C=3C=CC=4NC=C (C43) CC2N (C) C1                                                                                     |
| 1765 | 6. 172 | 495. 28561 | 2-[[[6,7-dimethoxy-1,2,3,4-tetrahydroisoquinolin-1-yl)methyl]-3-ethyl-9,10-dimethoxy-5-oxido-2,3,4,6,7,11h-hexahydro-1H-benzofalaminolizin-5-ium                                                                                                                                                                                                | [M-H] <sup>-</sup> | 495. 28644 | C29H40N205   | Emetine alkaloids                        | SSQAAXSNCRMBPJ-UHFFFAOYSA-N  | O=N12CCC3=CC (OC) =C (OC) C=C3C2CC (CC4NCC5=C (OC) C=C (OC) C=C5) C1C (OC) C1                                                            |
| 1766 | 6. 172 | 547. 2948  | Cymarine                                                                                                                                                                                                                                                                                                                                        | [M-H] <sup>-</sup> | 547. 29126 | C30H4409     | Cardenolide glycosides and derivatives   | XQCGNURMLWFJR-ZNDDOCHDSA-N   | O=C1C2CCC (OC3OC) C (O) C (OC) C3) CC2 (O) CCC4C1CC5 (C) C (C6=C=CC (=O) OC6) CC450                                                      |
| 1767 | 6. 187 | 168. 02977 | N-(2-Furoyl)glycine                                                                                                                                                                                                                                                                                                                             | [M-H] <sup>-</sup> | 168. 03023 | C7H7N04      | N-acyl-alpha amino acids                 | KSPQDMRTZZYQLM-UHFFFAOYSA-N  | O=C (O) CNC (=O) C=1OC=CC1                                                                                                               |
| 1768 | 6. 189 | 349. 21048 | Roxatidine acetate HCl                                                                                                                                                                                                                                                                                                                          | [M+H] <sup>+</sup> | 349. 21201 | C19H29C1N204 | N-benzylpiperidines                      | FEWCTJHCXOHWNL-UHFFFAOYSA-N  | C1. O=C (OCC (=O) NCCCOC1=CC=CC (=C1) CN2CCCCC2) C                                                                                       |
| 1769 | 6. 19  | 305. 10461 | 15,17-dihydroxy-9-methyl-4,10-dioxatricyclo[[11.4.0.0?;7]heptadec-1(17),13,15-triene-2,11-dione                                                                                                                                                                                                                                                 | [M-H] <sup>-</sup> | 305. 10306 | C16H1806     | Aryl alkyl ketones                       | BVDHPBILFRQGE-UHFFFAOYSA-N   | O=C1OC (C) CCCC2OC2 (C) C=3C (O) =CC (O) =CC3C1                                                                                          |
| 1770 | 6. 217 | 897. 38678 | 3-[(3S,5R,10S,13R,14S,17S)-14-hydroxy-3-[(2R,3S,4S,5S,6S)-3-hydroxy-4-methoxy-6-methyl-5-[(2S,3R,4S,5S,6R)-3,4,5-trihydroxy-6-3-hydroxy-5,5,8a-trimethyl-3,4,4a,6,7,8-hexahydronaphthalene-2-carboxylic acid                                                                                                                                    | [M+H] <sup>+</sup> | 897. 38806 | C42H66018    | Cardenolide glycosides and derivatives   | GZVMBXDQJRICT-OZPZHNRSA-N    | O=C1OCC (=C1) C2CC3 (O) C4CC5CC (OC6OC) C (C) OC7OC (OC8OC (C) C (O) C) C8O) C (O) C (O) C7O) C (OC1OC6) CCC5 (C) C4OCC23C               |
| 1771 | 6. 225 | 256. 19073 | 3-hydroxy-5,5,8a-trimethyl-3,4,4a,6,7,8-hexahydronaphthalene-2-carboxylic acid                                                                                                                                                                                                                                                                  | [M+H] <sup>+</sup> | 256. 1907  | C14H2203     | Beta hydroxy acids and derivatives       | LQZAHKUYJVAAR-UHFFFAOYSA-N   | O=C (O) C1=C2C (O) CCCC (C) C2CC1O                                                                                                       |
| 1772 | 6. 23  | 257. 17358 | alpha-dihydrolysergol                                                                                                                                                                                                                                                                                                                           | [M+H] <sup>+</sup> | 257. 17001 | C16H20N20    | Clavines and derivatives                 | UFKTZIXVYHGAES-XEGUGMAKSA-N  | OC1CN (C) C2CC3=CN=C4=CC=CC (=C43) C2C1                                                                                                  |
| 1773 | 6. 235 | 584. 2735  | Tricoumaroyl spermidine (isomer of 2952)                                                                                                                                                                                                                                                                                                        | [M+H] <sup>+</sup> | 584. 27441 | C34H37N306   | Coumaric acid and derivatives            | PFDWJJCSDYDRMZ-UHFFFAOYSA-N  | O=C (C=CC1=CC=C (O) C=C1) NCCCN (C (=O) C=C2C=CC=C (O) C=C2) CCC (CNC (=O) C=C3=CC=CC (O) C=C3)                                          |
| 1774 | 6. 248 | 483. 29504 | (2R,3S,4S,5S,6R)-2-[[[7-hydroxy-4-[(2)-5-hydroxy-3-methylpent-3-enyl]-4a,8,8-trimethyl-3-methylidene-2,4,5,6,7,8a-hexahydro-1H-naphthalen-2-3-[5-hydroxy-7-methoxy-2,3-dimethyl-6-(3-methylbut-2-enyl)-4-oxo-2,3-dihydrochromen-8-yl]hexanoic acid                                                                                              | [M-H] <sup>-</sup> | 483. 29633 | C26H4408     | Diterpene glycosides                     | JECOCDCQZSANS-RFKAOMIISA-N   | OC=C (C) CCC1C (=C) C (OC2OC) C (O) C (O) C2O) CC3C (C) C (C) C (O) CC13C                                                                |
| 1775 | 6. 254 | 403. 14877 | 3-[5-hydroxy-7-methoxy-2,3-dimethyl-6-(3-methylbut-2-enyl)-4-oxo-2,3-dihydrochromen-8-yl]hexanoic acid                                                                                                                                                                                                                                          | [M-H] <sup>-</sup> | 403. 14771 | C23H3206     | Chromones                                | UDNTMMLZUXNQM-UHFFFAOYSA-N   | O=C (O) CC (C1=C (OC) C (=C) C2=C1OC (C) C (C2=O) C) CC=C (C) C) CC=C                                                                    |
| 1776 | 6. 274 | 339. 17966 | coronardine                                                                                                                                                                                                                                                                                                                                     | [M+H] <sup>+</sup> | 339. 17966 | C21H26N202   | Ibogan-type alkaloids                    | NVVDQMVGALBDGE-UHFFFAOYSA-N  | O=C (OC) C12C=3NC=4CC=CC4C3CCN5CC (CC (CC) C51) C2                                                                                       |
| 1777 | 6. 275 | 345. 18036 | Formoterol                                                                                                                                                                                                                                                                                                                                      | [M+H] <sup>+</sup> | 345. 18088 | C19H24N204   | Amphetamines and derivatives             | BPZSYCZ1ITTYBL-UHFFFAOYNA-N  | OC=NC1=CC=C (CC=C1O) C (O) CNC (C) CC2=CC=C (OC) C=C2                                                                                    |
| 1778 | 6. 296 | 188. 03595 | Acetylisatin                                                                                                                                                                                                                                                                                                                                    | [M-H] <sup>-</sup> | 188. 03532 | C10H7N03     | Indoles and derivatives                  | LPGEHBASRKTDG-UHFFFAOYSA-N   | O=C1C (=O) N (C (=O) C) C=2C=CC=CC12                                                                                                     |
| 1779 | 6. 296 | 271. 10748 | naringenin                                                                                                                                                                                                                                                                                                                                      | [M-H] <sup>-</sup> | 271. 10629 | C15H1205     | Flavanones                               | FTWIRXFLQLPI-UHFFFAOYSA-N    | O=C1C=2C (O) =CC (O) =CC2OC (C3=CC=C (O) C=C3) C1                                                                                        |
| 1780 | 6. 312 | 512. 20221 | (R,E)-6-acetyl-7,9-dihydroxy-2-((3-(3-(2-methoxyethyl)-1,2,4-oxadiazol-5-yl)propyl)amino)ethylidene)-8,9b-dimethylidenezofb,difuran-1,3(2H,9H)-4a,8,8-trimethyl-3-methylidene-2,4,5,6,7,8a-hexahydro-1H-naphthalen-2-8-[(2R,3S)-5,7-dihydroxy-2-(4-hydroxyphenyl)-4-oxo-2,3-dihydrochromen-3-yl]-5,7-dihydroxy-2-(4-hydroxyphenyl)chromen-4-one | [M+H] <sup>+</sup> | 512. 20001 | C26H29N308   | Acetophenones                            | GCKXCHKHNLGAF-WGKDYUESA-N    | O=C1C=C2OC3=C (C (=O) C) C=C (O) =C3C2 (C (=O) C1=C (NCCC4=NC (C4O) CCCC4) C) C=C                                                        |
| 1781 | 6. 312 | 539. 16595 | 8-[(2R,3S)-5,7-dihydroxy-2-(4-hydroxyphenyl)-4-oxo-2,3-dihydrochromen-3-yl]-5,7-dihydroxy-2-(4-hydroxyphenyl)chromen-4-one                                                                                                                                                                                                                      | [M-H] <sup>-</sup> | 539. 16309 | C30H20010    | Biflavonoids and polyflavonoids          | YOGANETYUQWTM-PXJZQJOASA-N   | O=C1C=C (OC=2C1=C (O) C=C (O) C) C2C3C (=O) C=C4 (O) =CC (O) =CC4OC3=C5=CC=C (O) C=C5) C=6C=CC (O) =CC6                                  |
| 1782 | 6. 316 | 250. 0712  | Phenylacetylaspartic acid                                                                                                                                                                                                                                                                                                                       | [M-H] <sup>-</sup> | 250. 0713  | C12H13N05    | Amino acids                              | SVFKZPQPMZHLZ-UHFFFAOYNA-N   | O=C (O) CC (NC (=O) CC1=CC=CC=C1) C (=O) O                                                                                               |
| 1783 | 6. 325 | 877. 35803 | 4-[[[7R,11S,14S,16R)-14-[[[4-methoxy-6-methyl-5-[[[2S,3R,4S,5S,6R)-3,4,5-trihydroxy-6-[[[2R,3R,4S,5S,6R)-3,4,5-trihydroxy-6-(hydroxymethyl)oxan-2-(7S,9E,11S,12R,13S,14S,15S,16R,17S,18S,19E,21Z)-13-(acetyloxy)-26-(dimethylamino)-15,17-dihydroxy-11-methoxy-3,7,12,14,16,18,22-hexamethyl-                                                   | [M+H] <sup>+</sup> | 877. 36182 | C42H62017    | O-glycosyl compounds                     | DVFXYUYOYUOTA-DYCWBJYSA-N    | O=C1OCC (=C1) C2=C=CC34OC54OC6OC (OC7OC) C (OC8OC (COC9OC (C) C) C (O) C9O) C (O) C (O) C8O) C (OC) C7) CCCC6 (C) C5OCC723C              |
| 1784 | 6. 326 | 879. 3772  | (7S,9E,11S,12R,13S,14S,15S,16R,17S,18S,19E,21Z)-13-(acetyloxy)-26-(dimethylamino)-15,17-dihydroxy-11-methoxy-3,7,12,14,16,18,22-hexamethyl-                                                                                                                                                                                                     | [M+H] <sup>+</sup> | 879. 37    | C47H56N2013  | Macrolactams                             | CRQDRGLGJNQTJ-ZXWRESOLSA-N   | O=C (OC=1C=2C (=O) C=3NC (=O) C (=CC=CC (O) C) C (O) C (O) C (C) C (OC (=O) C) C (C) C (OC) C=C=CC4 (OC=C (C4=O) C2C (=O) C3N (C) C1) C1 |
| 1785 | 6. 326 | 202. 0515  | Indole-3-pyruvic acid                                                                                                                                                                                                                                                                                                                           | [M-H] <sup>-</sup> | 202. 05096 | C11H9N03     | Indolyl carboxylic acids and derivatives | RSTKLPEZGYGAPY-UHFFFAOYSA-N  | O=C (O) C (O) C1=C=CC=2C=C=CC21                                                                                                          |
| 1786 | 6. 328 | 649. 27307 | (S)-2-(((S)-7-acetamido-1,2,3-trimethoxy-9-oxo-5,6,7,9-tetrahydrobenzo[f]hentalen-10-yl)amino)-4-(methylthio)-N-(2-(2-                                                                                                                                                                                                                          | [M+H] <sup>+</sup> | 649. 27002 | C32H42N407S  | Methionine and derivatives               | PMKXQVXLVOSJT-ZCQVQJMSA-N    | O=C1C=C2C (=CC=C1NC (C (=O) NCCN3C (=O) CCC3) CCSC) C4=C (OC) C (OC) =C (OC) C=C4OCC2NC (=O) C                                           |
| 1787 | 6. 337 | 211. 13293 | (+)-Jasmonic acid                                                                                                                                                                                                                                                                                                                               | [M+H] <sup>+</sup> | 211. 13287 | C12H1803     | Jasmonic acids                           | ZNJFBWYDHLGLCU-HWKKXFMVSA-N  | CC)C=C/C=C[H]1[C=H]1C=H] (CC (O) =O) OCC1=O                                                                                              |
| 1788 | 6. 346 | 389. 00107 | PFAP-FT diPAP                                                                                                                                                                                                                                                                                                                                   | [M-H] <sup>-</sup> | 389. 00061 | C8H9F1004P   | PFSA                                     | ZPRPFGDLJHJEV-UHFFFAOYSA-N   | O=P (O) (OCCC (F) (F) F) OCCC (F) (F) C (F) (F) C (F) F                                                                                  |
| 1789 | 6. 357 | 515. 30316 | Ganoderic acid LM2                                                                                                                                                                                                                                                                                                                              | [M+H] <sup>+</sup> | 515. 29999 | C30H4207     | Triterpenoids                            | YVIVANDTNNUXHR-UGRWEMWSA-N   | O=C (O) C (=CC (O) CC (C) C1CC (=O) C2 (C3=C (C (=O) CC12C) C4 (C) CCC (=O) C (C) C) C4CC30) C) C                                        |
| 1790 | 6. 358 | 307. 12851 | Caffeoyl lysine                                                                                                                                                                                                                                                                                                                                 | [M-H] <sup>-</sup> | 307. 12729 | C15H20N205   | Caffeic acid and derivatives             | WVFMZTORJFNZPK-UHFFFAOYNA-N  | NC (CCCCNC (=O) C=C1=CC (O) =C (O) C=C1) C (O) =O                                                                                        |
| 1791 | 6. 36  | 249. 10913 | 2-hydroxylantolactone                                                                                                                                                                                                                                                                                                                           | [M+H] <sup>+</sup> | 249. 10852 | C15H2003     | Eudesmanolides, secoeudesmanolides, and  | FZSKLHDEGWSLTB-ATYMOLOSSA-N  | O=C1OC2CC3 (C (=CC2C1=C) C (C) CC (O) C3) C                                                                                              |
| 1792 | 6. 36  | 229. 03857 | 3-methyl-3,4-dihydro-1H-1,4-benzodiazepine-2,5-dione                                                                                                                                                                                                                                                                                            | [M+H] <sup>+</sup> | 229. 03738 | C10H10N202   | 1,4-benzodiazepines                      | LJONJQLKOKMKBR-UHFFFAOYSA-N  | OC1=NC (C (O) =NC=2C=CC=CC12) C                                                                                                          |
| 1793 | 6. 361 | 326. 09048 | Midazolam                                                                                                                                                                                                                                                                                                                                       | [M+H] <sup>+</sup> | 326. 086   | C18H13C1FN3  | Imidazo[1,5-a][1,4]benzodiazepines       | DDLJGOFVUZHBH-UHFFFAOYSA-N   | FC=1C=CC=CC1C2=NCC3=CN=C (N3C=4C=CC (C1) C=CC24) C                                                                                       |
| 1794 | 6. 366 | 369. 18057 | 8-hydroxy-6-methoxy-7-[(2S,3R,4S,5S,6R)-3,4,5-trihydroxy-6-(hydroxymethyl)oxan-2-yl]oxychromen-2-one                                                                                                                                                                                                                                            | [M-H] <sup>-</sup> | 369. 17978 | C16H18010    | Coumarin glycosides                      | RVWWDDKQXKCJ-ZOLYHUHESA-N    | O=C1OC=2C (O) =C (OC3OC) C (O) C (O) C3O) C (OC) =CC2C=C1                                                                                |
| 1795 | 6. 383 | 302. 19473 | heliocurassavicine n-oxide                                                                                                                                                                                                                                                                                                                      | [M+H] <sup>+</sup> | 302. 194   | C15H27N05    | Pyrrolizidines                           | DLNWZIVYKXLTN-YOPIWALVSA-N   | O=C (OCC1CC[N+](=I) ([O-]) OCC12) C (O) (C) C (O) C (C) C                                                                                |
| 1796 | 6. 384 | 431. 314   | Hecogenin                                                                                                                                                                                                                                                                                                                                       | [M+H] <sup>+</sup> | 431. 31558 | C27H4204     | Triterpenoids                            | QOLRLFLJMLZLQJ-LORDNJQFSA-N  | O=C1CC2C (CCC3CC (O) CCC3C) C4CC5OC6 (OCC (C) CC6) C (C) C5C14C                                                                          |
| 1797 | 6. 395 | 601. 37    | Timosaponin A1                                                                                                                                                                                                                                                                                                                                  | [M+H] <sup>+</sup> | 601. 37    | C33H5408     | Steroidal saponins                       | ZNEI1ZXNGXIAL-UHFFFAOYSA-N   | OC1OC (OCC2CC3 (C) C (CCC4C3CC5 (C) C4C6OC7 (OCC (C) CC7) C (C) C65) C2) C (O) C (O) C1O                                                 |
| 1798 | 6. 411 | 429. 11752 | Formononetin-7-O-glucoside                                                                                                                                                                                                                                                                                                                      | [M-H] <sup>-</sup> | 429. 11911 | C22H2209     | Isoflavone O-glycosides                  | MGJLSBDCWOSMHL-UHFFFAOYNA-N  | OC1=C=CC=C (C=C1) C1=COC2=CC (OC3OC) C (O) C (O) C3O) =CC=C2C1=O                                                                         |
| 1799 | 6. 415 | 300. 18002 | Tegaserod                                                                                                                                                                                                                                                                                                                                       | [M-H] <sup>-</sup> | 300. 18298 | C16H23N50    | Indoles and derivatives                  | JXDXRFUJZDKKGDV-UHFFFAOYSA-N | N=C (NNC=C1C=NC=2C=CC=CC1) NCCCC                                                                                                         |
| 1800 | 6. 436 | 375. 27365 | (E)-5-[(1S,4aR,8aR)-2-formyl-5,5,8a-trimethyl-1,4,4a,6,7,8-hexahydronaphthalen-1-yl]-3-(acetylloxymethyl)pent-2-enoic acid                                                                                                                                                                                                                      | [M-H] <sup>-</sup> | 375. 27643 | C22H3205     | Diterpenoids                             | KLGPVOFYVYHEGO-VBJQW1QDSA-N  | O=CC1=CCC2C (C) (CCC2C) C1CCC (=CC (=O) O) OOC (=O) C                                                                                    |
| 1801 | 6. 436 | 545. 27655 | 7-Deacetylkhivorin                                                                                                                                                                                                                                                                                                                              | [M+H] <sup>+</sup> | 545. 27448 | C30H4009     | Limonoids                                | MRMHZVITOFZZID-WXWNNQMSA-N   | O=C (OC1CC (=O) C) C2 (C) C (CC (O) C3 (C) C2CC4 (C) C (OC (=O) C5 (OC43) C6=C6) C4) C1C                                                 |
| 1802 | 6. 445 | 777. 2204  | methyl (1S,4aS,7aS)-5'-oxo-1-[(2S,3R,4S,5S,6R)-3,4,5-trihydroxy-6-(hydroxymethyl)oxan-2-yl]oxy-4'-[(1S)-1-[(R)-3-[4-[(2S,3R,4S,5S,6R)-3,4,5-                                                                                                                                                                                                    | [M-H] <sup>-</sup> | 777. 22473 | C36H42019    | Iridoid O-glycosides                     | AFY1WKNGSYXQC-WLJLAZQSA-N    | O=C (OC (C1=CC2 (OC1=O) C=CC3=C=CC (OC4OC) C (O) C (O) C4O) C=32) C (O) OC1) C1=C=C5=C=C=C (OC6OC) C (O) C (O) C6O) C=C5                 |
| 1803 | 6. 447 | 481. 34943 | brassinolide                                                                                                                                                                                                                                                                                                                                    | [M+H] <sup>+</sup> | 481. 35001 | C28H4806     | Brassinolides and derivatives            | IXVMHGQKLDRKH-KNBKMWSGSA-N   | O=C1OCC2C3CCC (C (C) C (O) C (O) C (C) C) C3 (C) CC2C4 (C) CC (O) 1C (O) CC14                                                            |
| 1804 | 6. 452 | 303. 25253 | 2-Myristoylglycerol                                                                                                                                                                                                                                                                                                                             | [M+H] <sup>+</sup> | 303. 25299 | C17H3404     | 2-monooacylglycerols                     | TYVMZSOXQNHWO-UHFFFAOYSA-N   | O=C (OC (CO) CO) CCCCCCCCCCCC                                                                                                            |

[illegible]

[illegible]

[illegible]

[illegible]

|      |       |           |                                                                                                                                  |                    |           |            |                                    |                             |                                                                                                    |
|------|-------|-----------|----------------------------------------------------------------------------------------------------------------------------------|--------------------|-----------|------------|------------------------------------|-----------------------------|----------------------------------------------------------------------------------------------------|
| 1977 | 7.623 | 304.26459 | Fenpropimorph                                                                                                                    | [M+H] <sup>+</sup> | 304.26349 | C20H33NO   | Phenylpropanes                     | RYAUSQKQZMAI-UHFFFAOYNA-N   | CC(C1C=CC=C(C=C1)C(C)C(C)C)CN2CC(C)OC(C)C2                                                         |
| 1978 | 7.624 | 390.28265 | Roquefortine C                                                                                                                   | [M+H] <sup>+</sup> | 390.27811 | C22H23N5O2 | Pyrrololindoles                    | SPWSUFUPTSJWNG-LHMLNZRCSA-N | O=C1C(N=C(O)C2N1C3NC=4C(=CC=C4C3)C2)C(C=C)C(C)C)-CC5=CN=C5                                         |
| 1979 | 7.65  | 284.29617 | 1-desoxymethylsphinganine                                                                                                        | [M+H] <sup>+</sup> | 284.29401 | C17H37NO   | 1,2-aminoalcohols                  | UGVBHUWZNNKIR-QGZVFWFLSA-N  | OC(CN)CCCCCCCCCCCC                                                                                 |
| 1980 | 7.662 | 172.16907 | Chrysanthemyl Alcohol                                                                                                            | [M+H] <sup>+</sup> | 172.16959 | C10H18O    | Monocyclic monoterpeneoids         | HIPIENKVKJCMAP-DTWKNJWSA-N  | 0CC1C(C=C(C)C)C1(C)C                                                                               |
| 1981 | 7.664 | 599.17377 | 4-[3,4,5-trihydroxy-6-(hydroxymethyl)oxan-2-yl]oxy-9-(3,4,5-trimethoxyphenyl)-5a,6,8a,9-tetrahydro-5H-[2]benzofuro[6,5-          | [M+H] <sup>+</sup> | 599.17352 | C28H32O13  | Lignan glycosides                  | PAIASCUMTHMGHU-UHFFFAOYSA-N | O=C1OCC2C3C=C(OC4OC(CO)C(CO)C4O)C=5OCC5C=C3C(C6=CC(OC)=C(OC)C(OC)=C6)C12                           |
| 1982 | 7.668 | 199.12221 | Tacrine                                                                                                                          | [M+H] <sup>+</sup> | 199.12297 | C13H14N2   | Acridines                          | YLJREFDVOIBQDA-UHFFFAOYSA-N | N=C1C=2C=CC=CC2NC3=C1CCCC3                                                                         |
| 1983 | 7.669 | 254.17445 | MPL-dm                                                                                                                           | [M+H] <sup>+</sup> | 254.17506 | C14H23NO3  | Tyrosols and derivatives           | CUKXSBOATJILRY-UHFFFAOYNA-N | CC(C)NCC(COC)=CC=C(C=C1)CCO1O                                                                      |
| 1984 | 7.679 | 292.18994 | (4aS)-6,7-dihydroxy-1,1,4a-trimethyl-3,4,10,10a-tetrahydro-2H-phenanthren-9-one                                                  | [M+H] <sup>+</sup> | 292.1907  | C17H22O3   | Diterpenoids                       | JMBKXUYCBKSSY-OMOCHNIRSA-N  | O=C1C2=C(CO)=C(CO)C=C2C3(C)CCCC(C)C3C1                                                             |
| 1985 | 7.684 | 449.22769 | Irigenin, 7-Benzyl Ether                                                                                                         | [M+H] <sup>+</sup> | 449.22553 | C25H22O8   | 3'-hydroxy,4'-methoxyisoflavonoids | WSKWDWDFVUKY-UHFFFAOYSA-N   | O=C1C(=COC=2C=C(OC=3C=CC=C3)C(OC)=C(CO)C12)C=C4C=C(CO)C(OC)=C(OC)C4                                |
| 1986 | 7.684 | 957.50177 | Soyasaponin Ba                                                                                                                   | [M+H] <sup>+</sup> | 957.50647 | C48H78O19  | Triterpene saponins                | WFRQIKSNAYUJZ-UHFFFAOYNA-N  | CC1(C)CC(O)C2(C)CC(C)C=C(OC4C5(C)CCC(OC6OC(C)C(CO)C6)C6OC6OC(C)C(CO)C6OC6OC(C)C(CO)C6)C(C)C        |
| 1987 | 7.69  | 433.09933 | Reynoutrin                                                                                                                       | [M+H] <sup>+</sup> | 433.10001 | C20H18O11  | Flavonoid-3-O-glycosides           | PZZRDJXEMZMDF-QDQGBAFUSA-N  | O=C1C(OC2OCC(CO)C2O)=C(OC=3C=C(CO)C(CO)C13)C=4C=CC(C)=C(CO)C4                                      |
| 1988 | 7.695 | 389.20721 | 3-[3-[(2E)-3,7-dimethylocta-2,6-dienyl]-4-hydroxyphenyl]-7-hydroxychromen-4-one                                                  | [M+H] <sup>+</sup> | 389.20807 | C25H26O4   | Isoflavones                        | ZBHUUXLHDOUMKM-REZTVBANSAN  | O=C1C(=COC2=CC(O)=CC(C12)=3C=CC(O)=C(C3)CC=C(C)CCC=C(C)C1C                                         |
| 1989 | 7.706 | 281.14209 | 4-(2,6-dihydroxy-6-methylheptan-2-yl)-3-hydroxybenzoic acid                                                                      | [M+H] <sup>+</sup> | 281.13943 | C15H22O5   | Sesquiterpenoids                   | YCUWMGYPKGLQKF-UHFFFAOYSA-N | O=C(O)C1=CC=C(C(O)=C1)C(O)C(C)CCC(O)C(C)C                                                          |
| 1990 | 7.707 | 326.14691 | 6-(2-aminopyrimidin-4-yl)-4-butyl-7-hydroxy-8-methyl-2H-chromen-2-one                                                            | [M+H] <sup>+</sup> | 326.14999 | C18H19N3O3 | 7-hydroxycoumarins                 | KMPN1YIOWJCPY-UHFFFAOYSA-N  | O=C1OC2=C(C=C(C=3N=C(N=CC3)N)C(O)=C2O)C(=C1)CCCC                                                   |
| 1991 | 7.707 | 274.27383 | ISOPALMITIC ACID                                                                                                                 | [M+H] <sup>+</sup> | 274.27405 | C16H32O2   | Long-chain fatty acids             | ZONJATNKKGVSV-UHFFFAOYSA-N  | O=C(O)CCCCCCCCCCCCC(C)C                                                                            |
| 1992 | 7.71  | 455.13159 | (2R,3S,4S,5R,6R)-5-[(2S,3R,4R)-3,4-dihydroxy-4-(hydroxymethyl)oxolan-2-yl]oxy-2-(hydroxymethyl)-6-(2-phenylethoxy)oxane-3,4-diol | [M+H] <sup>+</sup> | 455.13141 | C19H28O10  | O-glycosyl compounds               | UWKRNCNWJCHGZ-DERWJZPFA-N   | OC1OC(OC=2C=CC=CC2)C(OC3OCC(O)(CO)C3O)C(O)C1O                                                      |
| 1993 | 7.719 | 192.13783 | DEET                                                                                                                             | [M+H] <sup>+</sup> | 192.13829 | C12H17NO   | N,N-dialkyl-m-toluidides           | MMOXZBCLQITDF-UHFFFAOYSA-N  | CCN(CC)C(C1=CC=CC(C)=C1)=O                                                                         |
| 1994 | 7.733 | 357.26324 | 5-[6-[3-(hydroxy-4-methoxyphenyl)-1,3,3a,4,6,6a-hexahydrofuro[3,4-c]furan-3-yl]-2-methoxyphenyl]                                 | [M+H] <sup>+</sup> | 357.2594  | C20H22O6   | Furanoid lignans                   | VRIHVMFGDGRFLP-UHFFFAOYSA-N | OC1=CC(=CC(C1OC)C2OC3C(OC23)C4=CC=C(OC)C(O)=C4                                                     |
| 1995 | 7.733 | 325.20099 | FA 18:3+30                                                                                                                       | [M+H] <sup>+</sup> | 325.20071 | C18H30O5   | Oxidized fatty acids               | PLJHEKVESBJRJC-UHFFFAOYNA-N | O=C(O)CCCCCCCC(=O)C=CC(O)C(CO)CC=CCC                                                               |
| 1996 | 7.752 | 617.36725 | (2S,3R,4S,5R)-2-[(2-hydroxy-22-(2-hydroxypropan-2-yl)-3,8,8,17,19-pentamethyl-23,24-                                             | [M+H] <sup>+</sup> | 617.36951 | C35H54O9   | Cycloartanols and derivatives      | LTVCFOSN1VOVBK-RSGHPYSYSA-N | OC1OCC(OC2OCC34CC54C(=CCC3C2(C)C)C6(C)C(O)C78OC(C)C(C)C78(C)C)C5(C)C4(C)C(C)C1O                    |
| 1997 | 7.771 | 663.37299 | Medicagenic acid base + O-Hex                                                                                                    | [M+H] <sup>+</sup> | 663.37347 | C36H56O11  | Triterpene saponins                | XCHARI1ZLLEBL-UHFFFAOYNA-N  | O=C(O)C6(C)C(C(OC1OC(CO)C(CO)C1O)C(CO)C5(C)C(C6(C)C(C)C(C5(C)C=C24CC(C)C)C4)C(C=O)C(OC23(C)1)1)1)1 |
| 1998 | 7.773 | 391.23688 | Perilogenin                                                                                                                      | [M+H] <sup>+</sup> | 391.23999 | C23H34O5   | Cardenolides and derivatives       | QJPCKAJTLHONCS-FBAXFMHRSAN  | O=C1OCC(=C1)C2OCC(CO)C4CC(CO)C(CO)C(C5(C)C4OCC23C                                                  |
| 1999 | 7.774 | 221.0811  | Monoisobutyl phthalate                                                                                                           | [M+H] <sup>+</sup> | 221.08194 | C12H14O4   | Benzoic acid esters                | RZJSUWQGFCHNFS-UHFFFAOYSA-N | CC(C)COC(C1=CC=CC=C1C(=O)O)=O                                                                      |
| 2000 | 7.775 | 317.07245 | (3aR,4R,6E,10Z,11aR)-4-h                                                                                                         |                    |           |            |                                    |                             |                                                                                                    |

|      |        |            |                                                                                                                                          |                      |            |               |                                      |                               |                                                                                                  |
|------|--------|------------|------------------------------------------------------------------------------------------------------------------------------------------|----------------------|------------|---------------|--------------------------------------|-------------------------------|--------------------------------------------------------------------------------------------------|
| 2020 | 7. 974 | 250. 17645 | N, O-Didesmethylvenlafaxine                                                                                                              | [M+H] <sup>+</sup>   | 250. 18016 | C15H23N02     | Cyclohexanols                        | MMSWXJSQCAEDLK-UHFFFAOYNA-N   | CNOC(C1=CC=C(O)C=C1)C1(O)CCCC1                                                                   |
| 2021 | 7. 979 | 449. 0849  | astilbin                                                                                                                                 | [M-H] <sup>-</sup>   | 449. 07956 | C21H22O11     | Flavonoid-3-O-glycosides             | ZROGCCBNZBKLE-MPHRSVQHS-A-N   | O=C1C=2C(O)=CC(O)=CC2OC(C3=CC=C(O)C(O)=C3)C1OC4OC(C)C(C(=O)O)C4O                                 |
| 2022 | 7. 984 | 595. 36383 | (2R,6R)-6-[(3R,10S,12S,13R,17R)-3-(2-carboxyacetyl)oxy-12-hydroxy-4,4,10,13,14-pentamethyl-2,3,5,6,7,11,12,15,16,17-decahydro-1H-        | [M+H] <sup>+</sup>   | 595. 36047 | C34H52O7      | Triterpenoids                        | HMOGSPWDYKCAH-CBLCVTABSA-N    | O=C(O)CC(=O)CC1OC2C(C3=C(CCC2C1)C)C4(C)CCC(C(C)CCC(=O)C(C(=O)O)C)C4(C)C(C)C(C)C                  |
| 2023 | 7. 997 | 270. 07587 | Dimethenamid OXA                                                                                                                         | [M-H] <sup>-</sup>   | 270. 08057 | C12H17N04S    | Alpha amino acids and derivatives    | HOYCASTVMCEOTP-UHFFFAOYNA-N   | COCC(C)N(C(=O)(O)=O)C1=C(C)SC=C1C                                                                |
| 2024 | 8. 008 | 407. 17255 | Secoisolariciresinol                                                                                                                     | [M-H] <sup>-</sup>   | 407. 17114 | C20H26O6      | Lignols                              | PUEUDUXMCLALY-UHFFFAOYNA-N    | COC1=CC(CC(O)C(O)C)CC2=CC=C(C(O)C(OC)=C2)=CC=C1O                                                 |
| 2025 | 8. 009 | 272. 09085 | (E)-8-(1-(hydroxyimino)ethyl)-4,9-dimethyl-2H-furo[2,3-h]chromen-2-one                                                                   | [M+H] <sup>+</sup>   | 272. 09    | C15H13N04     | Angular furanocoumarins              | VEUCARGUJVDOP-CXUHZMBSA-N     | O=C1OC2=C(C=CC=OC(C(=NO)C)=C(C2)C)C(C(=C1)C                                                      |
| 2026 | 8. 009 | 601. 26843 | _130131                                                                                                                                  | [M+H] <sup>+</sup>   | 601. 263   | C30H42O11     | Terpene lactones                     | LB RJFDBQNUVAGM-VGCGLKNISA-N  | O=C(O)C1=C=CC2C(C(=O)OC1)C(O)(COC(=O)C3=CC4C(C(=O)OC3)C(C(O)CCC4C(C)C)CC2C(C)C                   |
| 2027 | 8. 022 | 252. 23137 | (2E,4E)-N-(2-methylpropyl)dodeca-2,4-dienamide                                                                                           | [M+H] <sup>+</sup>   | 252. 23218 | C16H29NO      | N-acyl amines                        | BBRMJCAPNGJKEK-AQASXUMVSA-N   | OC(=NCC(C)C)C=CC=CCCCCCC                                                                         |
| 2028 | 8. 023 | 533. 27032 | 9-hydroxy-9-[[[(E)-2-(hydroxymethyl)-3-[3-(hydroxymethyl)-6-propan-2-yl]cyclohex-2-en-1-yl]nonan-2-oxo]loxymethyl]-1-oxo-6-nonan-2-yl]-  | [M-H] <sup>-</sup>   | 533. 27557 | C29H42O9      | Terpene lactones                     | R0OCBDNPGVEDL-KEBDBYFISA-N    | O=C(O)C1=CC2C(C(=O)OC1)C(O)(COC(=O)C(=CC3C=C(O)CCC3(C)C)C(O)CC2C(C)C                             |
| 2029 | 8. 036 | 495. 12662 | [(4E)-7-acetyloxy-6-hydroxy-2-methyl-10-oxo-2,3,6,7,8,9-hexahydrooxecin-3-yl](F)-but-2-enoate                                            | [M+H] <sup>+</sup>   | 495. 12616 | C24H24O10     | Hydroxycinnamic acid glycosides      | IAVJHQVGTGRSIOM-UVMZMRP TSA-N | O=C(OC1OC(OC(=O)C=CC2=CC=C(C)C(O)C(O)C)C=CC3=C(C(=O)C)C=C3                                       |
| 2030 | 8. 052 | 213. 14804 | Dihydrojasmonic Acid                                                                                                                     | [M+H] <sup>+</sup>   | 213. 14851 | C12H20O3      | Jasmonic acids                       | PQEYTAGBXNEUQL-UHFFFAOYSA-N   | O=C(O)CC1CCC(=O)C1CCCC                                                                           |
| 2031 | 8. 055 | 598. 30341 | 5-[[[4-[5-[[[4-[5-[acetyl(hydroxy)amino]pentylamino]-4-oxobutanoyl]-hydroxyamino]pentylamino]-4-oxobutanoyl]-hydroxyamino]pentanoic acid | [M+H] <sup>+</sup>   | 598. 30585 | C25H45N5O10   | N-acyl amines                        | ZMCWALAGRPU LMT-UHFFFAOYSA-N  | O=C(O)CCCC(C)C(=O)CCC(O)=NCCCCC(O)C(=O)CCC(O)=NCCCCC(N)(O)C(=O)C                                 |
| 2032 | 8. 055 | 167. 14282 | Dihydrojasnone                                                                                                                           | [M+H] <sup>+</sup>   | 167. 14304 | C11H18O       | Cyclic ketones                       | YCI XWYOBMYNTGB-UHFFFAOYSA-N  | CCCCC1=C(C)CCC1=O                                                                                |
| 2033 | 8. 057 | 103. 03149 | Ethylenethiourea                                                                                                                         | [M+H] <sup>+</sup>   | 103. 03245 | C3H6N2S       | Imidazolidines                       | PDQAZBWRQCBEV-UHFFFAOYSA-N    | C1CNC(=N1)S                                                                                      |
| 2034 | 8. 058 | 279. 09235 | Triphenylphosphine oxide                                                                                                                 | [M+H] <sup>+</sup>   | 279. 09332 | C18H15OP      | Phenylphosphines and derivatives     | FIQMIBFVRAXMOP-UHFFFAOYSA-N   | C1=CC=C(C=C1)P(C2=CC=CC=C2)(C3=CC=CC=C3)=O                                                       |
| 2035 | 8. 063 | 360. 21573 | 9-phenyl-1-(2,4,6-trihydroxyphenyl)nonan-1-one                                                                                           | [M+H] <sup>+</sup>   | 360. 21692 | C21H26O4      | Alkyl-phenylketones                  | OOGZXWIAHJUYAH-UHFFFAOYSA-N   | O=C(C(=C(O)C)=CC(O)=CC1O)CCCCCCCCC2C=CC=CC2                                                      |
| 2036 | 8. 066 | 260. 20001 | Vesamicol                                                                                                                                | [M+H] <sup>+</sup>   | 260. 2009  | C17H25NO      | Phenylpiperidines                    | YSSBJODGTYRAMI-UHFFFAOYNA-N   | OC1CCCCC1N2CC(C=CC=CC=C3)CC2                                                                     |
| 2037 | 8. 075 | 316. 1167  | Pipltartine                                                                                                                              | [M-H] <sup>-</sup>   | 316. 11905 | C17H19NO5     | Cinnamic acids and derivatives       | VABYUUNZAVNPG-BQYQJAHWSA-N    | O=C(C=CC1=CC(OC)=C(OC)C(OC)=C1)N2C(=O)C=CCC2                                                     |
| 2038 | 8. 078 | 236. 1111  | 1-(4-methoxyphenyl)isoquinoline                                                                                                          | [M+2H] <sup>2+</sup> | 236. 11    | C16H13NO      | Phenylpyridines                      | VRGXPRJRDJGSKC-UHFFFAOYSA-N   | N=C1CC=CC=CC=C2C1C=3C=CC(OC)=CC3                                                                 |
| 2039 | 8. 083 | 367. 20914 | Pesticide4_Boscalid_C18H12Cl2N2O_3-Pyridinecarboxamide, 2-chloro-N-(4'-chloro[1,1'-biphenyl]-2-yl)-                                      | [M-H] <sup>-</sup>   | 367. 203   | C18H12Cl2N2O  | Aromatic anilides                    | WYEMLYFITZORAB-UHFFFAOYSA-N   | C1C=1CC(=CC1)C=2C=CC=CC2N=C(O)C3=CC=CC=C3C1                                                      |
| 2040 | 8. 087 | 286. 1058  | arborinine                                                                                                                               | [M+H] <sup>+</sup>   | 286. 10599 | C16H15N04     | Acridones                            | ATBZZQPALSPNMF-UHFFFAOYSA-N   | O=C1CC2CC3=C(CN4=C3C(OC)=C(OC)C(O)=C13)C                                                         |
| 2041 | 8. 091 | 223. 16907 | KOBUSONE                                                                                                                                 | [M+H] <sup>+</sup>   | 223. 16925 | C14H22O2      | Ketones                              | UETZJEZFKASPR-UZTWUQPSA-N     | O=C1CC2CC2(C)CCC3C1CC3(C)C                                                                       |
| 2042 | 8. 093 | 234. 11253 | Euparin                                                                                                                                  | [M+H] <sup>+</sup>   | 234. 11246 | C13H12O3      | Benzofurans                          | OPUFUNZTKHPZHM-UHFFFAOYSA-N   | O=C(C1=CC=CC=C2C(=CC2=C1O)C(=C)C)C                                                               |
| 2043 | 8. 097 | 397. 21783 | Mitragynine                                                                                                                              | [M-H] <sup>-</sup>   | 397. 21329 | C23H30N2O4    | Alkaloids                            | LELBFTMXC1IKXX-UHFFFAOYNA-N   | CCC1CN2CCC3=C(NC4=C3C(OC)=CC4)C2CC1C(=O)CC(C(=O)C                                                |
| 2044 | 8. 098 | 743. 19354 | jaceidin                                                                                                                                 | [M+H] <sup>+</sup>   | 743. 18933 | C18H16O8      | 6-O-methylated flavonoids            | XUWTZJRCPPNJR-UHFFFAOYSA-N    | O=C1C(OC)=CC(OC2=CC(O)=C(OC)C(O)=C12)C=CC=CC(O)=C(OC)C3                                          |
| 2045 | 8. 1   | 497. 28586 | Epoxgedunin                                                                                                                              | [M-H] <sup>-</sup>   | 497. 28519 | C28H34O8      | Limonoids                            | AZGNIKZHFJEPJ-FJONONFLSA-N    | O=C(OC1CC2C(C(=O)C3OC3C2(C)C4CC5(C)C(OC(=O)C6OC65C14C)C7=CC=C7)C)C1C                             |
| 2046 | 8. 104 | 193. 08611 | Butylparaben                                                                                                                             | [M-H] <sup>-</sup>   | 193. 08702 | C11H14O3      | p-Hydroxybenzoic acid alkyl esters   | QFOHBWFCXYLES-UHFFFAOYSA-N    | CCCCOC(C1=CC=C(C=C1)O)=O                                                                         |
| 2047 | 8. 107 | 617. 40112 | Phorbol-12-Myristate-13-Acetate                                                                                                          | [M+H] <sup>+</sup>   | 617. 40002 | C36H56O8      | Phorbol esters                       | PHEDXBVP1ONIQT-RGYGYFBSA-N    | O=C(OC12C(OC(=O)CCCCCCCCC)C(C)C3(O)C(C(=O)CC4(O)C(=O)C(=CC43)C)C1C2(C)C)C                        |
| 2048 | 8. 123 | 419. 32953 | (3S,10R,13R,14R,17R)-17-((2R,E)-5,6-dimethylhept-3-en-2-yl)-10,13-dimethyl-2,3,4,9,10,11,12,13,14,15,16,17-dodecahydro-1H-               | [M+H] <sup>+</sup>   | 419. 32999 | C28H44O       | Ergosterols and derivatives          | DNVPQKSNVMLRS-QRFHLYGJSA-N    | OC1CC2C=CC3(CCC4(C)C3CCC4C(C=CC(C)C(C)C)C2(C)CC1                                                 |
| 2049 | 8. 129 | 308. 22067 | Dihydrocapsaicin                                                                                                                         | [M+H] <sup>+</sup>   | 308. 22101 | C18H29NO3     | Methoxyphenols                       | XJQPQKLURWNAAH-UHFFFAOYSA-N   | OC1=CC=C(C=C1OC)CN=C(O)CCCCC(C)C                                                                 |
| 2050 | 8. 142 | 340. 22595 | Propoxyphene                                                                                                                             | [M+H] <sup>+</sup>   | 340. 22711 | C22H29NO2     | Stilbenes                            | XLMALTXPSGGQBX-UHFFFAOYNA-N   | O=C(OC(C=1C=CC=C1)C(=CC=CC=CC2)C(C)CN(C)C)CC                                                     |
| 2051 | 8. 144 | 403. 13757 | Hexamethylquercetagenin                                                                                                                  | [M+H] <sup>+</sup>   | 403. 138   | C21H22O8      | 7-O-methylated flavonoids            | CHXSDBWSFDZEU-UHFFFAOYSA-N    | O=C1C(OC)=CC(OC=2C=C(OC)C(OC)=C(OC)C12)C=CC=CC(OC)=C(OC)C3                                       |
| 2052 | 8. 16  | 387. 14737 | Cetirizine                                                                                                                               | [M-H] <sup>-</sup>   | 387. 1481  | C21H25ClN2O3  | Diphenylmethanes                     | ZKLPARSLTMPFCP-UHFFFAOYNA-N   | OC(=O)COCN1CN(CCC1)C(C1=CC=CC=C1)C1=CC=C(C1)C=C1                                                 |
| 2053 | 8. 163 | 322. 20074 | Jasmonyl isoleucine                                                                                                                      | [M-H] <sup>-</sup>   | 322. 203   | C22H32O8      | Trichothecenes                       | PNKLMTPXERFKEN-UHFFFAOYSA-N   | O=C(OC12CC(OC(=O)CC(C)C)C(=CC2OC3C(O)C(O)C1(C)C43OC4)C                                           |
| 2054 | 8. 164 | 375. 10617 | Casticin                                                                                                                                 | [M+H] <sup>+</sup>   | 375. 10745 | C19H18O8      | 7-O-methylated flavonoids            | PJQLSMYMKWUJG-UHFFFAOYSA-N    | COCC1=C(O)C=C(C=C1)C1=C(OC)C2=C(O)C(OC)=C(OC)C=C2O                                               |
| 2055 | 8. 167 | 417. 23776 | N-(3-(dimethylamino)propyl)-2-((3,4,8,8-tetramethyl-2-oxo-2,8,9,10-tetrahydroxyranol[2,3-f]chromen-5-yl)oxy)acetamide                    | [M+H] <sup>+</sup>   | 417. 23801 | C23H32N2O5    | Angular pyranocoumarins              | SYJCVRCHBPLGHM-UHFFFAOYSA-N   | O=C1OC2=C(C(OC(=O)N)NCCCN(C)C)=CC=3OC(C(C)CCC2C)C(=C1C)C                                         |
| 2056 | 8. 18  | 385. 20999 | Corynoxine                                                                                                                               | [M+H] <sup>+</sup>   | 385. 20999 | C22H28N2O4    | Indolizidines                        | DAXYLDFNWXHGB-RCFOJTTRSA-N    | O=C(OC)C(=COC)C1CC2N(CCC2C(=O)NC=4C=CC=CC4)CC1CC                                                 |
| 2057 | 8. 181 | 286. 20013 | Viridiflorine                                                                                                                            | [M+H] <sup>+</sup>   | 286. 20129 | C15H27NO4     | Pyrrrolizidines                      | WQSRLRZOVFVJH-ABHRYQDASA-N    | CC(C)[C-](O)([C=H])C(O)C(=O)OC[C@H]1CN2NCCC[C@H]12                                               |
| 2058 | 8. 182 | 400. 23981 | Karacoline                                                                                                                               | [M+H] <sup>+</sup>   | 400. 23999 | C22H35NO4     | Aconitane-type diterpenoid alkaloids | HKQZUYOVMYOFT-JEJCSOMWSA-N    | OC1CC2(C)CN(CCC)C3C4CC2C1C=CC5C6C(O)C5C4(O)CC6OC                                                 |
| 2059 | 8. 192 | 376. 03693 | Pesticide4_Prochloraz_C15H16Cl3N3O2                                                                                                      | [M+H] <sup>+</sup>   | 376. 03799 | C15H16Cl3N3O2 | Phenol ethers                        | TVLSRXXTLMFWEO-UHFFFAOYSA-N   | O=C(N1C=NC=C1)N(CCOC=2C(C1)=CC(C1)=CC2C1)CCC                                                     |
| 2060 | 8. 204 | 589. 16992 | genipin 1-gentiobioside                                                                                                                  | [M+H] <sup>+</sup>   | 589. 16925 | C23H34O15     | Iridoid O-glycosides                 | FYZXYLPBWLGI-AUOPOVQUSA-N     | O=C(OC)C1=CC(OC2OC(COC3OC(CO)C(O)C(O)C3O)C(O)C(O)C2O)C4C(=CC4)CO                                 |
| 2061 | 8. 213 | 827. 25452 | 2-[[[4-[4,6-dihydroxy-3-(3-methylbut-2-enyl)-2-[3,4,5-trihydroxy-6-(hydroxymethyl)oxan-2-yl]oxyphenyl]-3-hydroxy-2-(4-hydroxyphenyl)-5-  | [M+H] <sup>+</sup>   | 827. 25208 | C39H48O18     | Flavonoid-7-O-glycosides             | GQOCHOCFYNMUJ-UHFFFAOYSA-N    | OC1=CC=C(C=C1)C2OC=CC(OC4OC(CO)C(O)C4O)C=C(OC)C3(C(=C5C)C=CC(O)=C(C5OC6OC(CO)C(O)C6O)C=C(C)C)C2O |
| 2062 | 8. 227 | 505. 27747 | Tonantzitlolone B                                                                                                                        | [M+H] <sup>+</sup>   | 505. 28101 | C28H42O9      | Fatty acid esters                    | BKJAMMLKHPQMJI-SMKITLBYSA-N   | O=C(OC1C(OC2OC1(O)C(O)C3(OC(C3)C(=CC(=O)C)C(C)C)C(=C(C)C)C(OC(=O)C)C                             |

|      |       |           |                                                                                                                                                           |                    |           |             |                                          |                              |                                                                                      |
|------|-------|-----------|-----------------------------------------------------------------------------------------------------------------------------------------------------------|--------------------|-----------|-------------|------------------------------------------|------------------------------|--------------------------------------------------------------------------------------|
| 2063 | 8.245 | 281.09052 | 4-hydroxy-1'-methylspiro[benzo[e][1,3]oxazine-2,3'-indolin]-2'-one                                                                                        | [M+H] <sup>+</sup> | 281.09    | C16H12N2O3  | Benzoxazines                             | OZPNYAHEDUKMPF-UHFFFAOYSA-N  | O=C1N(C(=2C=CC=C2C31N=C(O)C(=4C=CC=CC4O3)C                                           |
| 2064 | 8.256 | 384.15884 | Meropenem                                                                                                                                                 | [M+H] <sup>+</sup> | 384.159   | C17H25N3O5S | Thienamycins                             | DMJNNHOUXLYBY-UHFFFAOYSA-N   | O=C(O)C1=C(SC2CNC(C(=O)N(C)C)C2)C(C)C31C(=O)C3C(O)C                                  |
| 2065 | 8.258 | 578.31488 | (2S,3R)-2-(1-((S)-2-(tert-butoxycarbonyl)-1,2,3,4-tetrahydroisoquinoline-3-carbonyl)-4-phenylpiperidine-3-carboxamido)-3-methylpentanoic acid             | [M+H] <sup>+</sup> | 578.32001 | C33H43N3O6  | Hybrid peptides                          | NBWLCAFFGQXOGJ-ILRLXPBVS-N   | O=C(OC(C)(C)O)N1C=2C=CC=C2C1C(=O)N3CCC(C(=O)NC(C(=O)O)(C)C)C(C(=4C=CC=CC4)C)C        |
| 2066 | 8.258 | 306.27872 | [(1R,5R,9S,13S)-5,9,13-trimethyltetraacyclo[11.2.1.0 <sup>9,2</sup> .0 <sup>2,9</sup> ]hexadec-14-en-5-yl]methanol                                        | [M+H] <sup>+</sup> | 306.27911 | C20H32O     | Diterpenoids                             | C1GQQQTZIDQQR-SGWMQEPOSA-N   | OC(C1)CCCC(C)C3CCC4(C=C/C3)C(CCC12)C4)C                                              |
| 2067 | 8.258 | 583.2702  | 4-((11aS)-1,3-dioxo-5-(p-tolyl)-11,11a-dihydro-1H-imidazo[1',5':1,6]pyrido[3,4-b]indol-2(3H,5H,6H)-yl)-N-(4-phenylbutan-2-                                | [M+H] <sup>+</sup> | 583.27002 | C37H34N4O3  | Beta carbolines                          | VIMCLONZOXFDPI-QPQITGAISA-N  | O=C(NC(C)CCC=1C=CC=C1)C2=CC=C(C=C2)N3C(=O)N4C(C5=CC=C(C(=5)C)C=C6NC=7C=CC=C7C6)C4C3O |
| 2068 | 8.258 | 306.16904 | Anisodamine                                                                                                                                               | [M+H] <sup>+</sup> | 306.17001 | C17H23NO4   | Tropane alkaloids                        | WTQYWNWRJXNDEG-UHFFFAOYSA-N  | O=C(OC1CC2N(C)C(C1)C(O)C2)C(C=3C=CC=C3)CO                                            |
| 2069 | 8.26  | 323.18753 | calopocarpin                                                                                                                                              | [M-H] <sup>-</sup> | 323.19284 | C20H20O4    | Pterocarpan                              | CYXCYFWIZXENQ-JXKFEZNVSA-N   | OC1=CC=C2C(OC3C4=CC(=O)C=C4CC23)CC=C(C)C=C1                                          |
| 2070 | 8.267 | 461.24326 | 7-(3,4-dihydroxyphenyl)-1-(4-hydroxyphenyl)-5-[(2S,3R,4S,5R)-3,4,5-trihydroxyoxan-2-yl]oxhexan-3-one                                                      | [M-H] <sup>-</sup> | 461.2435  | C24H30O9    | Linear diarylheptanoids                  | KQLSXWIDDTWR-WUOZLOAJSA-N    | O=C(CCC1=CC=C(O)C=C1)CC(OC2CCC(O)C(O)C2)CCC3=CC=C(O)C(O)=C3                          |
| 2071 | 8.276 | 267.14206 | 3,6-diphenylcyclohexane-1,2-diol                                                                                                                          | [M-H] <sup>-</sup> | 267.13904 | C18H20O2    | Cyclohexanols                            | KIDYUEHQXIEBKG-UHFFFAOYSA-N  | OC1C(O)C(C=2C=CC=CC2)CCC1C=3C=CC=CC3                                                 |
| 2072 | 8.284 | 527.45996 | N-lignoceroyl-5-hydroxytryptamide                                                                                                                         | [M+H] <sup>+</sup> | 527.45801 | C34H58N2O2  | Long-chain N-acylserotonins              | QLZQXTNKCAWVES-UHFFFAOYSA-N  | O=C(NCCC1=CNC=2C=CC(O)=CC21)CCCCCCCCCCCCCCCCCCCC                                     |
| 2073 | 8.284 | 635.4093  | O-glucopyranosylepideragenin, 28-                                                                                                                         | [M+H] <sup>+</sup> | 635.40997 | C36H58O9    | Triterpene saponins                      | WJMBWVSQAPLFO-DLQTVUGOSA-N   | O=C(OC1OC(C)C(O)C(O)C1O)C23OC(C)(C)C3C4=CC5CC(C)CC(C)C(O)C(O)C6OC7C(C)C4(C)C72       |
| 2074 | 8.284 | 165.09103 | Phenethylacetate                                                                                                                                          | [M+H] <sup>+</sup> | 165.091   | C10H12O2    | Benzene and substituted derivatives      | MDHYEMXUFSJLGV-UHFFFAOYSA-N  | O=C(OC(=1C=CC=CC1)C                                                                  |
| 2075 | 8.303 | 485.2753  | MGMG 16:3                                                                                                                                                 | [M-H] <sup>-</sup> | 485.27411 | C25H42O9    | Lipids                                   | LJJVATEJUGJSPWF-UHFFFAOYNA-N | O=C(OC(CO)COC1OC(CO)C(O)C1(O))C3CCCC=CC=CCO=CCO                                      |
| 2076 | 8.326 | 511.15887 | (2R,3S,4S,5R,6S)-2-[[[(2R,3R,4R)-3,4,4-dihydroxy-4-(hydroxymethyl)oxolan-2-yl]oxymethyl]-6-[4-hydroxy-3-(3-methylbut-2-en-1-yl)phenoxyl]oxane-3,4,5-triol | [M+H] <sup>+</sup> | 511.15762 | C22H32O11   | Phenolic glycosides                      | UEAATLPMPTZOFF-PYEGHPNJS-A-N | OC1=CC=C(OC2OC(CO3CCC(O)(CO)C3O)C(O)C2O)CC1C=CC=C(C)C                                |
| 2077 | 8.331 | 243.15901 | (5E)-3,4,9-trihydroxy-2-propyl-2,3,4,7,8,9-hexahydrooxecin-10-one                                                                                         | [M-H] <sup>-</sup> | 243.15417 | C12H20O5    | Oxocins                                  | KQJGPGHQDZVJH-ZZXKWFJSA-N    | O=C1OC(CCC(C)C(O)C(O)C=CCCC1O                                                        |
| 2078 | 8.332 | 529.31622 | (2S,3R,5S,9R)-2,3-dihydroxy-14-(hydroxymethyl)-5,9-dimethyl-14-[[[(2S,3R,4S,5S,6R)-3,4,5-trihydroxy-6-(hydroxymethyl)oxan-2-                              | [M-H] <sup>-</sup> | 529.31628 | C26H42O11   | Diterpene glycosides                     | QUCCBQWLVOVBR-BBJJSLPGSA-N   | O=C(O)C1(C)CCCC2(C)C3OC4OC3(CO4)OC5OC(C)(O)C(O)C5O)CO(CO)C(O)C12                     |
| 2079 | 8.333 | 313.1467  | Clomipramine                                                                                                                                              | [M-H] <sup>-</sup> | 313.14771 | C19H23ClN2  | Dibenzazepines                           | GDL1GK1OYRNDHA-UHFFFAOYSA-N  | C1C1=CC=C2C(=C1)N(C=3C=CC=CC3CC2)CCCN(C)C                                            |
| 2080 | 8.35  | 582.25183 | Tricoumaroyl spermidine                                                                                                                                   | [M-H] <sup>-</sup> | 582.25781 | C34H37N3O6  | Coumaric acid and derivatives            | PFDFWJCSQYDMZ-UHFFFAOYSA-N   | O=C(C=C(C1=CC=C(O)C=C1)NCCC(N(C)=O)C=CC2=CC(O)C=C2)CCC(NC(=O)C=C3C=CC=C(O)C=C3       |
| 2081 | 8.352 | 343.08032 | Coptisine                                                                                                                                                 | [M+H] <sup>+</sup> | 343.07999 | C19H14NO4+  | Protoberberine alkaloids and derivatives | XYHOBMEDLZIMP-UHFFFAOYSA-N   | O1C=2C=CC3=CC=4C5=CC=6OCOC6=C5CC[N+](=4)C=C3CC2O1                                    |
| 2082 | 8.354 | 304.15405 | Cetraxate                                                                                                                                                 | [M-H] <sup>-</sup> | 304.15543 | C17H23NO4   | Phenylpropanoic acids                    | FHRSHSOEWXUORL-UHFFFAOYSA-N  | O=C(O)CCC1=C=C(OC(=O)C2CCC(CN)CC2)C=C1                                               |
| 2083 | 8.358 | 310.27383 | Bentyl                                                                                                                                                    | [M+H] <sup>+</sup> | 310.27399 | C19H35NO2   | Carboxylic acid esters                   | CURUTKGFNZGFE-UHFFFAOYSA-N   | O=C(OC(CN)CC(CO)C1(OC(=O)C1)C2CCCCC2                                                 |
| 2084 | 8.366 | 356.27881 | Aphidicolin                                                                                                                                               | [M+H] <sup>+</sup> | 356.27951 | C20H34O4    | Aphidicolane and steroidane diterpenoids | NOFOAYPPHUXJR-APNQZ1XSA-N    | OC(C1)CC2CC3C1CC3CCC4(C)(CO)C(O)CC42C                                                |
| 2085 | 8.393 | 230.24718 | N,N-Dimethyldecylamine N-oxide                                                                                                                            | [M+H] <sup>+</sup> | 230.24785 | C14H31NO    | Long-chain alkyl amine oxides            | SYELZBGXA1XKHU-UHFFFAOYSA-N  | CCCCCCCCCCCC(C)(C)=O                                                                 |
| 2086 |       |           |                                                                                                                                                           |                    |           |             |                                          |                              |                                                                                      |

|      |       |           |                                                                                                                                       |                    |           |             |                                            |                             |                                                                                                |
|------|-------|-----------|---------------------------------------------------------------------------------------------------------------------------------------|--------------------|-----------|-------------|--------------------------------------------|-----------------------------|------------------------------------------------------------------------------------------------|
| 2106 | 8.688 | 425.37234 | 17 (21)-Hopen-6-one                                                                                                                   | [M+H] <sup>+</sup> | 425.37201 | C30H480     | Hopanoids                                  | OZFAGHUNGAZEMO-VKNUIDEPSA-N | O=C1CC2(C)C(CCC3C4(C(=C(C(C4)C(C)C)CC3C2(C)C5(C)CCCC(C)1)C(C15                                 |
| 2107 | 8.709 | 298.09604 | 5'-Methylthiadenosine                                                                                                                 | [M+H] <sup>+</sup> | 298.09683 | C11H15N5O3S | 5'-deoxy-5'-thionucleosides                | WUUGPSXJNOTRMR-UHFFFAOYNA-N | OC1C(O)C(OC1N2C=NC=3C(=NC=NC32)N)CSC                                                           |
| 2108 | 8.72  | 252.13965 | (E)-3-phenyl-N-(2-phenylethyl)prop-2-enamide                                                                                          | [M+H] <sup>+</sup> | 252.13829 | C17H17N0    | Cinnamic acid amides                       | BOSUEWCNVFBGV-VAWYSNFS-A-N  | OC(=NCCC=1C=CC=CC1)C=C=CC=CC=CC2                                                               |
| 2109 | 8.733 | 343.08133 | 5,7-dihydroxy-3,6-dimethoxy-2-(4-methoxyphenyl)-4H-chromen-4-one                                                                      | [M-H] <sup>-</sup> | 343.08099 | C18H16O7    | 6-O-methylated flavonoids                  | DWZAJFEYZI1HFO-UHFFFAOYSA-N | O=C1C(OC)=C(OC2=CC(O)=C(C(OC)C(O)=C12)C=3C=CC(OC)=CC3                                          |
| 2110 | 8.733 | 285.12445 | Brazilin                                                                                                                              | [M-H] <sup>-</sup> | 285.11926 | C16H14O5    | l-benzopyrans                              | UWHUTZOC7ZJUK-JKSUJKBHSA-N  | OC1=CC=C2C(OC3(C)CC4=CC(O)=C(O)C=C4C3)C=C1                                                     |
| 2111 | 8.768 | 187.13326 | 10-Hydroxydecanoic acid                                                                                                               | [M-H] <sup>-</sup> | 187.13397 | C10H20O3    | Medium-chain hydroxy acids and derivatives | YJCJVMMDTBEITC-UHFFFAOYSA-N | O=C(O)CCCCCCCCO                                                                                |
| 2112 | 8.771 | 282.15103 | N-normuifeirine                                                                                                                       | [M+H] <sup>+</sup> | 282.14999 | C18H19NO2   | Aporphines                                 | QKQAHDMMPQAC-UHFFFAOYSA-N   | O(C=1C=C2C3=C(C1OC)C4=C=CC=C4CC3NCC2)C                                                         |
| 2113 | 8.783 | 633.40021 | Echinocystic acid-3-O-glucoside                                                                                                       | [M-H] <sup>-</sup> | 633.40082 | C36H58O9    | Triterpene saponins                        | WYDPEADEZMKNM-UHFFFAOYNA-N  | CC1(C)CC2(C)CC3(C)C(=CCC4C5(C)CC(C6OC(C)C(O)C(C)C6O)C(C)C(C5CCC34C)C2C1)C(O)=O                 |
| 2114 | 8.784 | 559.30896 | MGMG 18:3                                                                                                                             | [M-H] <sup>-</sup> | 559.31073 | C27H46O9    | Lipids                                     | HUS1SCNTLUEZCN-UHFFFAOYNA-N | O=C(OC(C)COC1OC(CO)C(O)C(C)O)CCCCCCCC=CC=CCC=CCC                                               |
| 2115 | 8.786 | 346.3306  | icos-19-ene-1,2,4-triol                                                                                                               | [M+H] <sup>+</sup> | 346.33154 | C20H40O3    | Long-chain fatty alcohols                  | QVLYXPULBQ7JW-UHFFFAOYSA-N  | CCC(O)CC(O)CCCCCCCCCCCCC=C                                                                     |
| 2116 | 8.791 | 561.32367 | (2S,3R,4S,5S,6R)-2-[4-[[[(3S,4R,5S)-3-hydroxy-5-(4-hydroxy-3-methoxyphenyl)-4-(hydroxymethyl)oxolan-3-yl]methyl]-2-methoxyphenoxy]-6- | [M+H] <sup>+</sup> | 561.32379 | C26H34O12   | Lignan glycosides                          | SGXSYHDLSPXCM-CTQXEDXS-A-N  | OC1=CC=C(C=CC1OC)C2OC(C)C(C3=C(C=C(C4OC4O)C(C)C(O)C4O)1)C(O)=C3C2O                             |
| 2117 | 8.795 | 287.18497 | 2-decyl-3-hydroxypentanedioic acid                                                                                                    | [M-H] <sup>-</sup> | 287.1864  | C15H28O5    | Long-chain fatty acids                     | KOLGVIQEZBW1Q-UHFFFAOYSA-N  | O=C(O)CC(O)C(C)C(=O)O)CCCCCCCC                                                                 |
| 2118 | 8.825 | 765.44208 | Cauloside C (3-Glu(1-2)Ara Hederagenin) (NMR)                                                                                         | [M-H] <sup>-</sup> | 765.44305 | C41H66O13   | Triterpenoids                              | BRQGRHRLVQSG-UUWFFIQNSA-N   | CC1(C)CC[C@]2(CC[C@]3(C)C(=CC[C@H]4[C@]5[C@]C(C)[C@H](O)C=C4)C(C)[C@H](O)C=C1)C(C)[C@H](O)C=C1 |
| 2119 | 8.825 | 438.34378 | tomatidine                                                                                                                            | [M+H] <sup>+</sup> | 438.34    | C27H45NO2   | Spirostanes and derivatives                | XYNPHXGMVJBLV-JYAGXCGRSA-N  | OC1CCC2(C)C(CCC3C2CC4(C)C3CC5OC6(NOC(C)C6)C(C)C5)C1(C)C                                        |
| 2120 | 8.835 | 302.17462 | Dobutamine                                                                                                                            | [M+H] <sup>+</sup> | 302.17508 | C18H23NO3   | Catecholamines and derivatives             | JRWZLRBJNMZMF-UHFFFAOYNA-N  | CC(CCC1=CC=C(O)C=C1)NCC1=CC(O)=C(O)C=C1                                                        |
| 2121 | 8.859 | 179.10637 | (4-methylcyclohex-3-ene-1,1-diyl)dimethanol                                                                                           | [M+H] <sup>+</sup> | 179.10001 | C9H16O2     | Primary alcohols                           | JTRLVUONADOHI-UHFFFAOYSA-N  | OC(C)C(OC)CC(C)CC1                                                                             |
| 2122 | 8.859 | 359.11212 | 5-hydroxy-3,6,7-trimethoxy-2-(4-methoxyphenyl)-4H-chromen-4-one                                                                       | [M+H] <sup>+</sup> | 359.112   | C19H18O7    | 7-O-methylated flavonoids                  | ADNCMDZHONBR-UHFFFAOYSA-N   | O=C1C(OC)=C(OC2=CC(OC)C(OC)=C(O)C12)C=3C=CC(OC)=CC3                                            |
| 2123 | 8.866 | 453.34576 | Boldenone Undecylenate                                                                                                                | [M+H] <sup>+</sup> | 453.33633 | C30H44O3    | Steroid esters                             | ADMSNQOPMLSX-KEZAGTACSA-N   | CC12CC[C@H]3C(CCC4=C(C)C=CC43)[C@H]1CC[C@H]2OC(=O)CCCCCCC=                                     |
| 2124 | 8.904 | 297.1116  | [(2E)-2-hexa-2,4-diynylidene-1,6-dioxaspiro[4.4]nona-3,7-dien-9-yl] 3-methylbut-2-enoate                                              | [M+H] <sup>+</sup> | 297.11212 | C18H16O4    | Fatty acid esters                          | VJOI1YQDMELSH-OVCL1PMQSA-N  | O=C(OC1C=CC21OC(=CC=CC=C2)C=C2)C(C)C                                                           |
| 2125 | 8.957 | 519.2373  | neoandrographolide                                                                                                                    | [M+H] <sup>+</sup> | 519.23547 | C26H40O8    | Diterpene glycosides                       | YGCYRQKJYQXHG-RNQFMQVSA-N   | O=C1OCC=C1CC2C(=C)CCC3C(C)C(C4OC(CO)C(C)C4O)CCCC2O                                             |
| 2126 | 8.958 | 547.34485 | N-[5-[[4-[4-(acetyl(hydroxy)amino)butylamino]-4-oxobutanoyl]-hydroxylaminomethyl]-N''-(5-aminononyl)-N'-hydroxybutanediamide          | [M+H] <sup>+</sup> | 547.34497 | C24H46N6O8  | N-acyl amines                              | GUZJCKBQAGXGH-UHFFFAOYSA-N  | O=C(N(O)CCCCN(C)O)CCC(=O)N(O)CCCCN=C(O)CCC(=O)N(O)CCC(CO)C                                     |
| 2127 | 8.968 | 373.12799 | Isoisinenetin                                                                                                                         | [M+H] <sup>+</sup> | 373.12799 | C20H20O7    | 8-O-methylated flavonoids                  | UYCWETUOAG7IL-UHFFFAOYSA-N  | O=C1C=C(OC=2C(OC)=C(OC)C(OC)C12)C=3C=CC(OC)=C(OC)C3                                            |
| 2128 | 8.974 | 343.08334 | Eupatilin                                                                                                                             | [M-H] <sup>-</sup> | 343.08234 | C18H16O7    | 6-O-methylated flavonoids                  | DRRWBCNQKKOL-UHFFFAOYSA-N   | COCl=CC=C(C=C1OC)C1=CC(=O)C2=C(O)C(OC)=C(O)C=C2O1                                              |
| 2129 | 8.974 | 353.23441 | Prostaglandin E1                                                                                                                      | [M-H] <sup>-</sup> | 353.23334 | C20H34O5    | Prostaglandins and related compounds       | GMVPFGQO1O1MI-UHFFFAOYNA-N  | O=C(O)CCCCCCC1C(=O)CC(O)C1C=CC(OC)CCCC                                                         |
| 2130 | 8.984 | 301.21802 | dehydroabietic acid                                                                                                                   | [M+H] <sup>+</sup> | 301.21701 | C20H28O2    |                                            |                             |                                                                                                |

[illegible]

[illegible]

[illegible]

[illegible]

[illegible]

[illegible]

|      |        |           |                                                                                                                                                |                      |           |                |                                           |                             |                                                                                   |
|------|--------|-----------|------------------------------------------------------------------------------------------------------------------------------------------------|----------------------|-----------|----------------|-------------------------------------------|-----------------------------|-----------------------------------------------------------------------------------|
| 2407 | 12.593 | 427.38852 | 3-Epilupeol                                                                                                                                    | [M+H] <sup>+</sup>   | 427.39343 | C30H500        | Triterpenoids                             | MQXYUHLBZPQQO-1SZJTHHZA-S-N | OC1CCC(C)(C)CCC3(C)C2CC4C5C(C(=C)C)CC5(C)CCC43C(C1(C)=O)                          |
| 2408 | 12.613 | 409.23532 | beta-TOXICAROL                                                                                                                                 | [M-H] <sup>-</sup>   | 409.23636 | C23H2207       | Rotenones                                 | MTTUVGLGBORBP1-UHFFFAOYSA-N | O=C1C=C(C)OC3CC4=CC(OC)=C(O)C(=C)C13C=C5OC(C=C5=C2O)(C)C                          |
| 2409 | 12.622 | 249.14821 | 2-[(2S,4aR,8aS)-2-hydroxy-4a-methyl-8-methylidene-3,4,5,6,7,8a-hexahydro-1H-naphthalen-2-yl]non-2-enoic acid                                   | [M-H] <sup>-</sup>   | 249.14961 | C15H2203       | Eudesmane, isoeudesmane or cycloeudesmane | WQMBGCHXXVLQTE-CFVMTHKISA-N | O=C(O)C(=O)C1(O)CC2(C)CCCC(=O)C2C1                                                |
| 2410 | 12.637 | 277.14157 | 3,7-Epoxyxycaryophyllan-6-ol                                                                                                                   | [M+2H] <sup>2+</sup> | 277.14157 | C15H2602       | Oxepanes                                  | KSMZUKWIDPCGBS-UHFFFAOYSA-N | OC1CCC2(OC1(C)CCC3C2CC3(C)C)C                                                     |
| 2411 | 12.648 | 499.25668 | Lucidenic acid C                                                                                                                               | [M+H] <sup>+</sup>   | 499.26001 | C27H4007       | Triterpenoids                             | X1MQDJNNEMWDH-VHPIRQCPISA-N | O=C(O)CCC(C)C1CC(=O)C2(C3=C(C(=O)C(O)C12C)C4(C)CCC(O)C(C)C4C30)C                  |
| 2412 | 12.653 | 247.64191 | Imatinib Mesylate                                                                                                                              | [M+2H] <sup>2+</sup> | 247.63699 | C30H35N7O4S    | Benzanilides                              | YLMAHNUQAMNNX-UHFFFAOYSA-N  | O=C(NC1=CC=C(C(=C1)NC=2N=CC=C(N2)C3=CN=CC(=C3)C4=CC=C(C=C4)CN5C(N)C(C5)=S(=O)=O)C |
| 2413 | 12.655 | 462.09622 | 7-Methylthioheptyl glucosinolate                                                                                                               | [M-H] <sup>-</sup>   | 462.09317 | C15H29N09S3    | Alkylglucosinolates                       | SHJVBSHKTUXLG-MFRQQAQSA-N   | CSCCCCCVC(C(S(C[H])10(C[H])(CO)1(C[H])(O)1(C[H])10)=N(S(=O)(=O)2O)4)C             |
| 2414 | 12.662 | 517.22748 | Angeloylgomisins H                                                                                                                             | [M+H] <sup>+</sup>   | 517.22394 | C28H3608       | Hydrolyzable tannins                      | ZSAUXCVJDVCLRS-XSRHQFTISA-N | O=C(OC1=C(OC)C(OC)=C2(C3=C(C(OC)C(OC)=C(OC)C=C3C(OC)C(C)C2)C(=O)C                 |
| 2415 | 12.68  | 134.04462 | L-Aspartic acid                                                                                                                                | [M+H] <sup>+</sup>   | 134.04478 | C4H7N04        | Aspartic acid and derivatives             | CKLJMWJ2IHZCS-REOHLBHS-A-N  | C(C(=H)C(=O)O)N(C(=O)O)                                                           |
| 2416 | 12.69  | 277.1413  | 3-hydroxy-1a,5-bis(hydroxymethyl)-5,6b-dimethyl-1,3,3a,4,6,6a-hexahydrocyclopropan[c]inden-2-one                                               | [M+2H] <sup>2+</sup> | 277.14102 | C14H2204       | Cyclic alcohols and derivatives           | CUAPOUHDJKWLB-UHFFFAOYSA-N  | O=C1C(O)C2CC(C)(CO)CC2C3(C)CC13CO                                                 |
| 2417 | 12.696 | 347.22128 | 2-[4a-methyl-8-methylidene-4-(3-methylpentanoyloxy)-1,2,3,4,5,6,7,8a-octahydronaphthalen-2-yl]non-2-enoic acid                                 | [M-H] <sup>-</sup>   | 347.22278 | C21H3204       | Eudesmane, isoeudesmane or cycloeudesmane | QVSFEQJQPOHP-UHFFFAOYSA-N   | O=C(O)C(=O)C(=O)C1CC(OC(=O)CC(C)C)C2(C)CCCC(=O)C2C1                               |
| 2418 | 12.698 | 519.32819 | (2E,4E)-1-[(1R,3S,8R,10S,14S)-12-[(2E,4E)-hexa-2,4-dienoyl]-1,6,8,13-tetrahydroxy-3,7,10,14-tetramethyl-2,9-                                   | [M+H] <sup>+</sup>   | 519.32812 | C28H3208       | Oxepanes                                  | VATYWO1GRKMMCM-QHSDNFTQSA-N | O=C(C(=O)CC)C1C(=O)C2(C3C(C(=O)C=CC(=O)C(=O)C4(C)C1C5(C)C4(C)C3)C(C5)O)C          |
| 2419 | 12.699 | 499.25378 | (3E,5S,7R,8R,11E,13S,15R,16R)-3,5,7,11,13,15-hexamethyl-8,16-bis(1,3-oxazol-5-ylmethyl)-1,9-dioxacyclohexadeca-3,11-diene-2,10-dione           | [M+H] <sup>+</sup>   | 499.25061 | C28H38N2O6     | Macrolides and analogues                  | LAJRJVLDAKYLGO-FQSDNCTISA-N | O=C1OC(C=C2OC=NC2)C(C)CC(C(=O)C(=O)C(=O)C(=O)C(=O)C(C)CC(C(=O)C)C(C)C             |
| 2420 | 12.7   | 443.26395 | Strophanthidin                                                                                                                                 | [M+2H] <sup>2+</sup> | 443.25845 | C23H3206       | Cardenolides and derivatives              | ODJLBQGV1NUJMM-HXZDTFASAA-N | O=CC12CCC(O)CC2(O)CCC3C1CCC4(C)C(C5=CC(=O)OC5)CCC34O                              |
| 2421 | 12.701 | 451.26227 | Repaglinide                                                                                                                                    | [M-H] <sup>-</sup>   | 451.26022 | C27H36N2O4     | Phenylpiperidines                         | FAEKWTJYAMJFK-UHFFFAOYNA-N  | O=C(O)C1=CC=C(C(=C1)CC)CC(O)C(C(=O)C2C(=O)C(=O)C(=O)C2)CC(C)C                     |
| 2422 | 12.708 | 458.97763 | Pesticide3_Hexaflumuron_C16H8C12F6N2O3                                                                                                         | [M-H] <sup>-</sup>   | 458.97501 | C16H8C12F6N2O3 | N-benzoyl-N'-phenylureas                  | RGNPBRKPHBKXN-UHFFFAOYSA-N  | O=C(NC(=O)C(=O)C(F)=CC(=O)F)N2=CC(C1)=C(OC(F)F)C(F)F(C)C1)=O                      |
| 2423 | 12.719 | 499.33569 | Poricoic acid A                                                                                                                                | [M+H] <sup>+</sup>   | 499.34    | C31H4605       | Triterpenoids                             | KYAQLXUMUEKGR-SMFZJLCSA-N   | O=C(O)CCC1(C2=CC3(C)C(C)C(C)C3(C2=CCC1C(=O)C)C(C)C(=O)C(=O)CCC(=O)C(C)C           |
| 2424 | 12.721 | 471.22241 | (2R,3S,4S,5R,6R)-2-[[[2(R,3R,4R,5S)-3,4-dihydroxy-5-(hydroxymethyl)oxolan-2-yl]oxymethyl]-6-[(2E)-3,7-dimethylocta-2,6-dienoxyloxa-3,4,5-triol | [M+H] <sup>+</sup>   | 471.22006 | C21H36010      | Terpene glycosides                        | AWDKYYAAQLEFP-XRSPUIAFSA-N  | OC11OC(OC2OC(OC=C(C)CCC=C(C)C)C(O)C(O)C2O)C(O)C1O                                 |
| 2425 | 12.721 | 258.12772 | Telmisartan (Micardis)                                                                                                                         | [M+H] <sup>+</sup>   | 258.12601 | C33H30N4O2     | Biphenyls and derivatives                 | RMMXLNWKUUMAY-UHFFFAOYSA-N  | O=C(O)C(=O)C(=O)C(=O)C1=CC(=O)C2(C3C4=CC(=O)C(=O)C4=CC(=O)C3)C(C)C1C              |
| 2426 | 12.748 | 621.43817 | Ginsenoside compound K                                                                                                                         | [M-H] <sup>-</sup>   | 621.43719 | C36H6208       | Triterpenoids                             | FVJZARNDLYOMSU-UHFFFAOYNA-N | CC(C)=CCCC(C)(OC1OC(CO)C(O)C1O)C1OC2(C)C1C(O)CC1C3(C)C(CCC(O)C(C)C3)C2C1C         |
| 2427 | 12.752 | 333.27866 | (1R,2R,4aS,8aS)-1-((S)-3-hydroxy-3-methylpentyl)-2,5,5,8a-tetramethyl-8,9-dihydro-1H-naphthalen-2-ol                                           | [M+H] <sup>+</sup>   | 333.28    | C20H3802       | Diterpenes                                | VWPNQCLIQCRGC-HHUQCJWSA-N   | OC(C)(CC)CCC1(O)C(OC)C2(C)(C)CCCC12C                                              |
| 2428 | 12.771 | 515.31677 | 2-hydroxy-3-[(1R,3S,4S,5R,6R)-2-hydroxy-5-(hydroxymethyl)oxolan-                                                                               |                      |           |                |                                           |                             |                                                                                   |

[illegible]

|      |        |           |                                                                                                                                                                                                                                                                                                                                                                                                                                                                                                                                                                                                                                                                                                                                                                                                                                                                                                                                                                                                                                                                                                                                                                                                                                                                                                                                                                                                                                                                                                                                                                                                                                                                                                                                                                                                                                                                                                                                                                                                                                                                                                                                                                                                                                                                                                                                                                                                                                                                                                                                                                                                                                                                                                                                                                                                                                                                                                                                                                                                                                                                                                                                                                                                                                                                                                                                                                                                                                                                                                                                                                                                                                                                                                                                                                                                                                                                                                                                                                                                                                                                                                                                                                                                                                                                                                                                                                                                                                                                                                                                                                                                                                                                                                                                                                                                                                                                                                                                                                                                                                                                                                                                                                                                                                                                                                                                                                                                                                                                                                                                                                                                                                                                                                                                                                                                                |          |           |              |                                      |                             |                                                                                               |
|------|--------|-----------|----------------------------------------------------------------------------------------------------------------------------------------------------------------------------------------------------------------------------------------------------------------------------------------------------------------------------------------------------------------------------------------------------------------------------------------------------------------------------------------------------------------------------------------------------------------------------------------------------------------------------------------------------------------------------------------------------------------------------------------------------------------------------------------------------------------------------------------------------------------------------------------------------------------------------------------------------------------------------------------------------------------------------------------------------------------------------------------------------------------------------------------------------------------------------------------------------------------------------------------------------------------------------------------------------------------------------------------------------------------------------------------------------------------------------------------------------------------------------------------------------------------------------------------------------------------------------------------------------------------------------------------------------------------------------------------------------------------------------------------------------------------------------------------------------------------------------------------------------------------------------------------------------------------------------------------------------------------------------------------------------------------------------------------------------------------------------------------------------------------------------------------------------------------------------------------------------------------------------------------------------------------------------------------------------------------------------------------------------------------------------------------------------------------------------------------------------------------------------------------------------------------------------------------------------------------------------------------------------------------------------------------------------------------------------------------------------------------------------------------------------------------------------------------------------------------------------------------------------------------------------------------------------------------------------------------------------------------------------------------------------------------------------------------------------------------------------------------------------------------------------------------------------------------------------------------------------------------------------------------------------------------------------------------------------------------------------------------------------------------------------------------------------------------------------------------------------------------------------------------------------------------------------------------------------------------------------------------------------------------------------------------------------------------------------------------------------------------------------------------------------------------------------------------------------------------------------------------------------------------------------------------------------------------------------------------------------------------------------------------------------------------------------------------------------------------------------------------------------------------------------------------------------------------------------------------------------------------------------------------------------------------------------------------------------------------------------------------------------------------------------------------------------------------------------------------------------------------------------------------------------------------------------------------------------------------------------------------------------------------------------------------------------------------------------------------------------------------------------------------------------------------------------------------------------------------------------------------------------------------------------------------------------------------------------------------------------------------------------------------------------------------------------------------------------------------------------------------------------------------------------------------------------------------------------------------------------------------------------------------------------------------------------------------------------------------------------------------------------------------------------------------------------------------------------------------------------------------------------------------------------------------------------------------------------------------------------------------------------------------------------------------------------------------------------------------------------------------------------------------------------------------------------------------------------------------|----------|-----------|--------------|--------------------------------------|-----------------------------|-----------------------------------------------------------------------------------------------|
| 2493 | 13.815 | 438.05661 | (2R)-2-Hydroxy-2-phenethylglucosinolate                                                                                                                                                                                                                                                                                                                                                                                                                                                                                                                                                                                                                                                                                                                                                                                                                                                                                                                                                                                                                                                                                                                                                                                                                                                                                                                                                                                                                                                                                                                                                                                                                                                                                                                                                                                                                                                                                                                                                                                                                                                                                                                                                                                                                                                                                                                                                                                                                                                                                                                                                                                                                                                                                                                                                                                                                                                                                                                                                                                                                                                                                                                                                                                                                                                                                                                                                                                                                                                                                                                                                                                                                                                                                                                                                                                                                                                                                                                                                                                                                                                                                                                                                                                                                                                                                                                                                                                                                                                                                                                                                                                                                                                                                                                                                                                                                                                                                                                                                                                                                                                                                                                                                                                                                                                                                                                                                                                                                                                                                                                                                                                                                                                                                                                                                                        | [M-H]-   | 438.05341 | C15H21NO10S2 | Glucosinolates                       | GAPDDBFHNHZIS-UHFFFAOYNA-N  | OC[C@]1(SO(C(C(CO)C2=C(CO)C=C2)=NOS(O)(=O)=O)(C(O)C(O)C1O                                     |
| 2494 | 13.823 | 335.14978 | Pyrenophorol                                                                                                                                                                                                                                                                                                                                                                                                                                                                                                                                                                                                                                                                                                                                                                                                                                                                                                                                                                                                                                                                                                                                                                                                                                                                                                                                                                                                                                                                                                                                                                                                                                                                                                                                                                                                                                                                                                                                                                                                                                                                                                                                                                                                                                                                                                                                                                                                                                                                                                                                                                                                                                                                                                                                                                                                                                                                                                                                                                                                                                                                                                                                                                                                                                                                                                                                                                                                                                                                                                                                                                                                                                                                                                                                                                                                                                                                                                                                                                                                                                                                                                                                                                                                                                                                                                                                                                                                                                                                                                                                                                                                                                                                                                                                                                                                                                                                                                                                                                                                                                                                                                                                                                                                                                                                                                                                                                                                                                                                                                                                                                                                                                                                                                                                                                                                   | [M-H]+   | 335.14999 | C16H24O6     | Macrolides and analogues             | RBQNDQKFC1JGL-UTBFYLPBSA-N  | O=C1OC(C)CCC(O)C=CC(=O)OC(C)CCC(O)C=C1                                                        |
| 2495 | 13.825 | 471.2706  | Ingenol-5,20-acetonide-3-O-angetate                                                                                                                                                                                                                                                                                                                                                                                                                                                                                                                                                                                                                                                                                                                                                                                                                                                                                                                                                                                                                                                                                                                                                                                                                                                                                                                                                                                                                                                                                                                                                                                                                                                                                                                                                                                                                                                                                                                                                                                                                                                                                                                                                                                                                                                                                                                                                                                                                                                                                                                                                                                                                                                                                                                                                                                                                                                                                                                                                                                                                                                                                                                                                                                                                                                                                                                                                                                                                                                                                                                                                                                                                                                                                                                                                                                                                                                                                                                                                                                                                                                                                                                                                                                                                                                                                                                                                                                                                                                                                                                                                                                                                                                                                                                                                                                                                                                                                                                                                                                                                                                                                                                                                                                                                                                                                                                                                                                                                                                                                                                                                                                                                                                                                                                                                                            | [M-H]+   | 471.26999 | C28H38O6     | Fatty acid esters                    | STFFIQUHWFISBB-RKHHLFRASA-N | O=C(OC1C(=C(C2C3(=O)C(C=C(C4OC(OC412O)(C)C)C5C(C3C3)C5(C)C)C)C(=C(CO)C                        |
| 2496 | 13.831 | 403.26736 | ascochlorin                                                                                                                                                                                                                                                                                                                                                                                                                                                                                                                                                                                                                                                                                                                                                                                                                                                                                                                                                                                                                                                                                                                                                                                                                                                                                                                                                                                                                                                                                                                                                                                                                                                                                                                                                                                                                                                                                                                                                                                                                                                                                                                                                                                                                                                                                                                                                                                                                                                                                                                                                                                                                                                                                                                                                                                                                                                                                                                                                                                                                                                                                                                                                                                                                                                                                                                                                                                                                                                                                                                                                                                                                                                                                                                                                                                                                                                                                                                                                                                                                                                                                                                                                                                                                                                                                                                                                                                                                                                                                                                                                                                                                                                                                                                                                                                                                                                                                                                                                                                                                                                                                                                                                                                                                                                                                                                                                                                                                                                                                                                                                                                                                                                                                                                                                                                                    | [M-H]-   | 403.26532 | C23H29C104   | Hydroxybenzaldehydes                 | SETVRSKZJJWOPA-FLDGXSQCSA-N | O=C1C(=O)C(C(=C(O)C(C1)=C1)C)CO=C(C(=CC2(C)C(=O)CCC2)C)C                                      |
| 2497 | 13.839 | 277.21613 | a-Linolenic acid (NMR)                                                                                                                                                                                                                                                                                                                                                                                                                                                                                                                                                                                                                                                                                                                                                                                                                                                                                                                                                                                                                                                                                                                                                                                                                                                                                                                                                                                                                                                                                                                                                                                                                                                                                                                                                                                                                                                                                                                                                                                                                                                                                                                                                                                                                                                                                                                                                                                                                                                                                                                                                                                                                                                                                                                                                                                                                                                                                                                                                                                                                                                                                                                                                                                                                                                                                                                                                                                                                                                                                                                                                                                                                                                                                                                                                                                                                                                                                                                                                                                                                                                                                                                                                                                                                                                                                                                                                                                                                                                                                                                                                                                                                                                                                                                                                                                                                                                                                                                                                                                                                                                                                                                                                                                                                                                                                                                                                                                                                                                                                                                                                                                                                                                                                                                                                                                         | [M-H]-   | 277.21732 | C18H30O2     | Linoleic acids and derivatives       | DTSISQBPPRVQHS-PBXOOCHISA-N | CC\C=C/C\C=C/C\C=C/C\CCCCCCCC(O)=O                                                            |
| 2498 | 13.853 | 751.46173 | alpha-Hederin                                                                                                                                                                                                                                                                                                                                                                                                                                                                                                                                                                                                                                                                                                                                                                                                                                                                                                                                                                                                                                                                                                                                                                                                                                                                                                                                                                                                                                                                                                                                                                                                                                                                                                                                                                                                                                                                                                                                                                                                                                                                                                                                                                                                                                                                                                                                                                                                                                                                                                                                                                                                                                                                                                                                                                                                                                                                                                                                                                                                                                                                                                                                                                                                                                                                                                                                                                                                                                                                                                                                                                                                                                                                                                                                                                                                                                                                                                                                                                                                                                                                                                                                                                                                                                                                                                                                                                                                                                                                                                                                                                                                                                                                                                                                                                                                                                                                                                                                                                                                                                                                                                                                                                                                                                                                                                                                                                                                                                                                                                                                                                                                                                                                                                                                                                                                  | [M-H]+   | 751.46271 | C41H66O12    | Triterpenoids                        | KEOITPILCOILGM-UHFFFAOYNA-N | CC1OC(OC2(C)(O)C)OC2OC2CC3(C)C(OC4(C)C3OC=C3C5OC(C)(C)CCC5(CCC43C)C(O)=O)C2(C)OC(C)(O)C(C)C1O |
| 2499 | 13.871 | 381.29797 | 2,3-dihydroxypropyl stearate                                                                                                                                                                                                                                                                                                                                                                                                                                                                                                                                                                                                                                                                                                                                                                                                                                                                                                                                                                                                                                                                                                                                                                                                                                                                                                                                                                                                                                                                                                                                                                                                                                                                                                                                                                                                                                                                                                                                                                                                                                                                                                                                                                                                                                                                                                                                                                                                                                                                                                                                                                                                                                                                                                                                                                                                                                                                                                                                                                                                                                                                                                                                                                                                                                                                                                                                                                                                                                                                                                                                                                                                                                                                                                                                                                                                                                                                                                                                                                                                                                                                                                                                                                                                                                                                                                                                                                                                                                                                                                                                                                                                                                                                                                                                                                                                                                                                                                                                                                                                                                                                                                                                                                                                                                                                                                                                                                                                                                                                                                                                                                                                                                                                                                                                                                                   | [M-H]+   | 381.29999 | C21H42O4     | l-monoacylglycerols                  | VBICXKHEKHSIBG-FQEVSJTJZA-N | O=C(OCC(O)(O)O)CCCCCCCCCCCCCCCCCC                                                             |
| 2500 | 13.884 | 280.16101 | Schinifoline                                                                                                                                                                                                                                                                                                                                                                                                                                                                                                                                                                                                                                                                                                                                                                                                                                                                                                                                                                                                                                                                                                                                                                                                                                                                                                                                                                                                                                                                                                                                                                                                                                                                                                                                                                                                                                                                                                                                                                                                                                                                                                                                                                                                                                                                                                                                                                                                                                                                                                                                                                                                                                                                                                                                                                                                                                                                                                                                                                                                                                                                                                                                                                                                                                                                                                                                                                                                                                                                                                                                                                                                                                                                                                                                                                                                                                                                                                                                                                                                                                                                                                                                                                                                                                                                                                                                                                                                                                                                                                                                                                                                                                                                                                                                                                                                                                                                                                                                                                                                                                                                                                                                                                                                                                                                                                                                                                                                                                                                                                                                                                                                                                                                                                                                                                                                   | [M-H]+   | 280.16    | C17H23NO     | Hydroquinonoles                      | HCUSLQJBQAQC-BUHFFFAOYSA-N  | O=C1C=C(N(C=2C=CC=C12))CCCCCCC                                                                |
| 2501 | 13.896 | 507.27579 | (2E,4E)-1-[(2R,6S,14S,22S,25R)-25-(3,3-dimethyloxiran-2-yl)-15-methyl-1,3,13,15-                                                                                                                                                                                                                                                                                                                                                                                                                                                                                                                                                                                                                                                                                                                                                                                                                                                                                                                                                                                                                                                                                                                                                                                                                                                                                                                                                                                                                                                                                                                                                                                                                                                                                                                                                                                                                                                                                                                                                                                                                                                                                                                                                                                                                                                                                                                                                                                                                                                                                                                                                                                                                                                                                                                                                                                                                                                                                                                                                                                                                                                                                                                                                                                                                                                                                                                                                                                                                                                                                                                                                                                                                                                                                                                                                                                                                                                                                                                                                                                                                                                                                                                                                                                                                                                                                                                                                                                                                                                                                                                                                                                                                                                                                                                                                                                                                                                                                                                                                                                                                                                                                                                                                                                                                                                                                                                                                                                                                                                                                                                                                                                                                                                                                                                               | [M-H]-   | 507.27655 | C32H36NaO2   | Alpha carbolines                     | XZF5MUXYAYCHO-QREHLEPSA-N   | O=C(C(=CC=C)N1CCCC23C4OC(=CC4N5NC6=CC=CC7=C6S3CCN(C7C7R8OC)C(C1)2)C                           |
| 2502 | 13.905 | 417.29654 | 6-[[[5-(hydroxymethyl)-2,5,8a-trimethyl-1,4,4a,6,7,8-hexahydronaphthalen-1-yl]methyl]-3-methylidene-7-oxabicyclo[4.1.0]heptane-2,4,5-triol                                                                                                                                                                                                                                                                                                                                                                                                                                                                                                                                                                                                                                                                                                                                                                                                                                                                                                                                                                                                                                                                                                                                                                                                                                                                                                                                                                                                                                                                                                                                                                                                                                                                                                                                                                                                                                                                                                                                                                                                                                                                                                                                                                                                                                                                                                                                                                                                                                                                                                                                                                                                                                                                                                                                                                                                                                                                                                                                                                                                                                                                                                                                                                                                                                                                                                                                                                                                                                                                                                                                                                                                                                                                                                                                                                                                                                                                                                                                                                                                                                                                                                                                                                                                                                                                                                                                                                                                                                                                                                                                                                                                                                                                                                                                                                                                                                                                                                                                                                                                                                                                                                                                                                                                                                                                                                                                                                                                                                                                                                                                                                                                                                                                     | [M-H]+   | 417.29257 | C22H34O5     | Oxepanes                             | GYERARYFYBXXO-UHFFFAOYSA-N  | OC[C@](C)(CCCC(C)C)C(C(=C(CC12)C)C3C4OC4(O)C(=C)C(O)C3O                                       |
| 2503 | 13.92  | 581.30774 | Isocucurbitacin B                                                                                                                                                                                                                                                                                                                                                                                                                                                                                                                                                                                                                                                                                                                                                                                                                                                                                                                                                                                                                                                                                                                                                                                                                                                                                                                                                                                                                                                                                                                                                                                                                                                                                                                                                                                                                                                                                                                                                                                                                                                                                                                                                                                                                                                                                                                                                                                                                                                                                                                                                                                                                                                                                                                                                                                                                                                                                                                                                                                                                                                                                                                                                                                                                                                                                                                                                                                                                                                                                                                                                                                                                                                                                                                                                                                                                                                                                                                                                                                                                                                                                                                                                                                                                                                                                                                                                                                                                                                                                                                                                                                                                                                                                                                                                                                                                                                                                                                                                                                                                                                                                                                                                                                                                                                                                                                                                                                                                                                                                                                                                                                                                                                                                                                                                                                              | [M-H]+   | 581.30902 | C32H46O8     | Cucurbitacins                        | WTBZNVRBNJWSFP-OUKQBFQZSA-N | O=C(O)C(=C(O)C(O)C(C)C1C(O)C2(C)C3OC=C4C(C(=O)C(O)C(C)C4(C)C)C3(C)C(=O)C12C)C(C)C(C)C         |
| 2504 | 13.93  | 542.16547 | Doxorubicin                                                                                                                                                                                                                                                                                                                                                                                                                                                                                                                                                                                                                                                                                                                                                                                                                                                                                                                                                                                                                                                                                                                                                                                                                                                                                                                                                                                                                                                                                                                                                                                                                                                                                                                                                                                                                                                                                                                                                                                                                                                                                                                                                                                                                                                                                                                                                                                                                                                                                                                                                                                                                                                                                                                                                                                                                                                                                                                                                                                                                                                                                                                                                                                                                                                                                                                                                                                                                                                                                                                                                                                                                                                                                                                                                                                                                                                                                                                                                                                                                                                                                                                                                                                                                                                                                                                                                                                                                                                                                                                                                                                                                                                                                                                                                                                                                                                                                                                                                                                                                                                                                                                                                                                                                                                                                                                                                                                                                                                                                                                                                                                                                                                                                                                                                                                                    | [M-H]-   | 542.16681 | C27H29NO11   | Anthracyclines                       | AOJJ5UZOXBQZNB-DIHIFYAZSA-N | O=C1C=2C=C=C(CO)C2C(=O)C=3C(O)=C4C(=C(O)C13)CC(O)C(C(=O)C)CC4OC5OC(C)C(O)(N)C5                |
| 2505 | 13.937 | 691.43793 | MONENSIN SODIUM (monensin A is shown)                                                                                                                                                                                                                                                                                                                                                                                                                                                                                                                                                                                                                                                                                                                                                                                                                                                                                                                                                                                                                                                                                                                                                                                                                                                                                                                                                                                                                                                                                                                                                                                                                                                                                                                                                                                                                                                                                                                                                                                                                                                                                                                                                                                                                                                                                                                                                                                                                                                                                                                                                                                                                                                                                                                                                                                                                                                                                                                                                                                                                                                                                                                                                                                                                                                                                                                                                                                                                                                                                                                                                                                                                                                                                                                                                                                                                                                                                                                                                                                                                                                                                                                                                                                                                                                                                                                                                                                                                                                                                                                                                                                                                                                                                                                                                                                                                                                                                                                                                                                                                                                                                                                                                                                                                                                                                                                                                                                                                                                                                                                                                                                                                                                                                                                                                                          | [M-H]+   | 691.43915 | C37H63NaO10  | Ketals                               | GYPNBQSUNTBSD-DUDHYVAZSA-M  | [Na+].[O-]C([O-])C(C)C(OC)C(C)C1OC2(OC(C)C2)C3OC(C)C(C)C3C4OC(C4C)C                           |
| 2506 | 13.94  | 278.14941 | cyclo(tyrosyl-propyl)                                                                                                                                                                                                                                                                                                                                                                                                                                                                                                                                                                                                                                                                                                                                                                                                                                                                                                                                                                                                                                                                                                                                                                                                                                                                                                                                                                                                                                                                                                                                                                                                                                                                                                                                                                                                                                                                                                                                                                                                                                                                                                                                                                                                                                                                                                                                                                                                                                                                                                                                                                                                                                                                                                                                                                                                                                                                                                                                                                                                                                                                                                                                                                                                                                                                                                                                                                                                                                                                                                                                                                                                                                                                                                                                                                                                                                                                                                                                                                                                                                                                                                                                                                                                                                                                                                                                                                                                                                                                                                                                                                                                                                                                                                                                                                                                                                                                                                                                                                                                                                                                                                                                                                                                                                                                                                                                                                                                                                                                                                                                                                                                                                                                                                                                                                                          | [M+2H]2+ | 278.1499  | C14H16N2O3   | Alpha amino acids and derivatives    | LSGOTAXPMUCUK-UHFFFAOYSA-N  | O=C1N2CCCC2(O)=NC1C3C=CC(O)C(O)=C3                                                            |
| 2507 | 13.943 | 250.02029 | Clothianidin                                                                                                                                                                                                                                                                                                                                                                                                                                                                                                                                                                                                                                                                                                                                                                                                                                                                                                                                                                                                                                                                                                                                                                                                                                                                                                                                                                                                                                                                                                                                                                                                                                                                                                                                                                                                                                                                                                                                                                                                                                                                                                                                                                                                                                                                                                                                                                                                                                                                                                                                                                                                                                                                                                                                                                                                                                                                                                                                                                                                                                                                                                                                                                                                                                                                                                                                                                                                                                                                                                                                                                                                                                                                                                                                                                                                                                                                                                                                                                                                                                                                                                                                                                                                                                                                                                                                                                                                                                                                                                                                                                                                                                                                                                                                                                                                                                                                                                                                                                                                                                                                                                                                                                                                                                                                                                                                                                                                                                                                                                                                                                                                                                                                                                                                                                                                   | [M-H]+   | 250.01601 | C6H8ClN5O2S  | 2,5-disubstituted thiazoles          | PGOOBECOWQEB-UHFFFAOYSA-N   | CN=C(NC1=CN(C)C1S)NN(=O)=O                                                                    |
| 2508 | 13.949 | 281.24762 | Trans-Vaccenic acid                                                                                                                                                                                                                                                                                                                                                                                                                                                                                                                                                                                                                                                                                                                                                                                                                                                                                                                                                                                                                                                                                                                                                                                                                                                                                                                                                                                                                                                                                                                                                                                                                                                                                                                                                                                                                                                                                                                                                                                                                                                                                                                                                                                                                                                                                                                                                                                                                                                                                                                                                                                                                                                                                                                                                                                                                                                                                                                                                                                                                                                                                                                                                                                                                                                                                                                                                                                                                                                                                                                                                                                                                                                                                                                                                                                                                                                                                                                                                                                                                                                                                                                                                                                                                                                                                                                                                                                                                                                                                                                                                                                                                                                                                                                                                                                                                                                                                                                                                                                                                                                                                                                                                                                                                                                                                                                                                                                                                                                                                                                                                                                                                                                                                                                                                                                            | [M-H]-   | 281.2486  | C18H34O2     | Long-chain fatty acids               | UWHZ1QPFPDPJM-BQVQJAHWSA-N  | CCCCC/C=C\CCCCCCCC(O)=O                                                                       |
| 2509 | 13.954 | 511.21042 | Flemphilippinin A                                                                                                                                                                                                                                                                                                                                                                                                                                                                                                                                                                                                                                                                                                                                                                                                                                                                                                                                                                                                                                                                                                                                                                                                                                                                                                                                                                                                                                                                                                                                                                                                                                                                                                                                                                                                                                                                                                                                                                                                                                                                                                                                                                                                                                                                                                                                                                                                                                                                                                                                                                                                                                                                                                                                                                                                                                                                                                                                                                                                                                                                                                                                                                                                                                                                                                                                                                                                                                                                                                                                                                                                                                                                                                                                                                                                                                                                                                                                                                                                                                                                                                                                                                                                                                                                                                                                                                                                                                                                                                                                                                                                                                                                                                                                                                                                                                                                                                                                                                                                                                                                                                                                                                                                                                                                                                                                                                                                                                                                                                                                                                                                                                                                                                                                                                                              | [M-H]+   | 511.20999 | C30H32O6     | 6-prenylated isoflavanonones         | VBTMMYSEYFPKP-UHFFFAOYSA-N  | O=C1C(=COC=2C1=C(O)C=3C=C(C(OC3C2OC=C(C)C)C(C)C(=C(C)C)C)C(=C(C)C)C(=C(C)C)C                  |
| 2510 | 13.957 | 577.44592 | Daucosterol;Sitogluside                                                                                                                                                                                                                                                                                                                                                                                                                                                                                                                                                                                                                                                                                                                                                                                                                                                                                                                                                                                                                                                                                                                                                                                                                                                                                                                                                                                                                                                                                                                                                                                                                                                                                                                                                                                                                                                                                                                                                                                                                                                                                                                                                                                                                                                                                                                                                                                                                                                                                                                                                                                                                                                                                                                                                                                                                                                                                                                                                                                                                                                                                                                                                                                                                                                                                                                                                                                                                                                                                                                                                                                                                                                                                                                                                                                                                                                                                                                                                                                                                                                                                                                                                                                                                                                                                                                                                                                                                                                                                                                                                                                                                                                                                                                                                                                                                                                                                                                                                                                                                                                                                                                                                                                                                                                                                                                                                                                                                                                                                                                                                                                                                                                                                                                                                                                        | [M-H]+   | 577.44702 | C35H60O6     | Stigmastanes and derivatives         | NPJCTIMALKLTFW-OFUAXYQCSA-N | OC1CC(OC2OC3=CC4C(CCC5(C)C(CCC45)C(C)CCC(C)C(C)C)C3(C)C2)C(C)C(O)C1O                          |
| 2511 | 13.959 | 529.34937 | Gymnemenin                                                                                                                                                                                                                                                                                                                                                                                                                                                                                                                                                                                                                                                                                                                                                                                                                                                                                                                                                                                                                                                                                                                                                                                                                                                                                                                                                                                                                                                                                                                                                                                                                                                                                                                                                                                                                                                                                                                                                                                                                                                                                                                                                                                                                                                                                                                                                                                                                                                                                                                                                                                                                                                                                                                                                                                                                                                                                                                                                                                                                                                                                                                                                                                                                                                                                                                                                                                                                                                                                                                                                                                                                                                                                                                                                                                                                                                                                                                                                                                                                                                                                                                                                                                                                                                                                                                                                                                                                                                                                                                                                                                                                                                                                                                                                                                                                                                                                                                                                                                                                                                                                                                                                                                                                                                                                                                                                                                                                                                                                                                                                                                                                                                                                                                                                                                                     | [M-H]+   | 529.34998 | C30H50O6     | Triterpenoids                        | VKJLHZPVYLJKG-ABHXHSUSA-N   | OC[C@](C)C(OC)C2(C)C3OC=C4C5OC(C)C(C)C(O)C(C)C5(CO)C(O)C(C4)C3(C)C(C)C12                      |
| 2512 | 13.96  | 269.14359 | 4-benzyl-7-hydroxy-1-hydroxymethyl-3,5,6,7-tetrahydro-8h-pyrrolizinium                                                                                                                                                                                                                                                                                                                                                                                                                                                                                                                                                                                                                                                                                                                                                                                                                                                                                                                                                                                                                                                                                                                                                                                                                                                                                                                                                                                                                                                                                                                                                                                                                                                                                                                                                                                                                                                                                                                                                                                                                                                                                                                                                                                                                                                                                                                                                                                                                                                                                                                                                                                                                                                                                                                                                                                                                                                                                                                                                                                                                                                                                                                                                                                                                                                                                                                                                                                                                                                                                                                                                                                                                                                                                                                                                                                                                                                                                                                                                                                                                                                                                                                                                                                                                                                                                                                                                                                                                                                                                                                                                                                                                                                                                                                                                                                                                                                                                                                                                                                                                                                                                                                                                                                                                                                                                                                                                                                                                                                                                                                                                                                                                                                                                                                                         | [M-H]+   | 269.14001 | C15H20NO2+   | Alkaloids and derivatives            | MPDVGSUYGBLA-ARHFVFGLSA-N   | OC[C@]1CN1J2(CC=3C=CC=C3)CCC(O)C12                                                            |
| 2513 | 13.97  | 439.30093 | (2E,4E,6E,8E,10E,12E,14E,16E)-2,6,11,15-tetramethyl-17-(2,6,6,6-trimethyl-1-cyclohexen-1-yl)-2,4,6,8,10,12,14,16-octadecaacetanilal                                                                                                                                                                                                                                                                                                                                                                                                                                                                                                                                                                                                                                                                                                                                                                                                                                                                                                                                                                                                                                                                                                                                                                                                                                                                                                                                                                                                                                                                                                                                                                                                                                                                                                                                                                                                                                                                                                                                                                                                                                                                                                                                                                                                                                                                                                                                                                                                                                                                                                                                                                                                                                                                                                                                                                                                                                                                                                                                                                                                                                                                                                                                                                                                                                                                                                                                                                                                                                                                                                                                                                                                                                                                                                                                                                                                                                                                                                                                                                                                                                                                                                                                                                                                                                                                                                                                                                                                                                                                                                                                                                                                                                                                                                                                                                                                                                                                                                                                                                                                                                                                                                                                                                                                                                                                                                                                                                                                                                                                                                                                                                                                                                                                            | [M-H]+   | 439.29999 | C30H40O      | Triterpenoids                        | DFWMFLMMAQZH-DOKBYWTLISA-N  | O=CC(=CC(CO)C(=CC(CO)C(C(=CC(CO)C(C(=CC(CO)C(C)C)C                                            |
| 2514 | 13.971 | 338.27582 | 5-(1,2,4a,5-tetramethyl-7-oxo-3,4,8,8a-tetrahydro-2H-naphthalen-1-yl)-3-methylnonanonic acid                                                                                                                                                                                                                                                                                                                                                                                                                                                                                                                                                                                                                                                                                                                                                                                                                                                                                                                                                                                                                                                                                                                                                                                                                                                                                                                                                                                                                                                                                                                                                                                                                                                                                                                                                                                                                                                                                                                                                                                                                                                                                                                                                                                                                                                                                                                                                                                                                                                                                                                                                                                                                                                                                                                                                                                                                                                                                                                                                                                                                                                                                                                                                                                                                                                                                                                                                                                                                                                                                                                                                                                                                                                                                                                                                                                                                                                                                                                                                                                                                                                                                                                                                                                                                                                                                                                                                                                                                                                                                                                                                                                                                                                                                                                                                                                                                                                                                                                                                                                                                                                                                                                                                                                                                                                                                                                                                                                                                                                                                                                                                                                                                                                                                                                   | [M-H]+   | 338.26895 | C20H32O3     | Colansene and clerodane diterpenoids | RNWJUFUZQBBLK-UHFFFAOYSA-N  | O=C(O)C(C)CC(C)C(C)C(C)CC2(C(=CC(O)C)CC2)C                                                    |
| 2515 | 13.972 | 231.02675 | D-(-)-quinic acid                                                                                                                                                                                                                                                                                                                                                                                                                                                                                                                                                                                                                                                                                                                                                                                                                                                                                                                                                                                                                                                                                                                                                                                                                                                                                                                                                                                                                                                                                                                                                                                                                                                                                                                                                                                                                                                                                                                                                                                                                                                                                                                                                                                                                                                                                                                                                                                                                                                                                                                                                                                                                                                                                                                                                                                                                                                                                                                                                                                                                                                                                                                                                                                                                                                                                                                                                                                                                                                                                                                                                                                                                                                                                                                                                                                                                                                                                                                                                                                                                                                                                                                                                                                                                                                                                                                                                                                                                                                                                                                                                                                                                                                                                                                                                                                                                                                                                                                                                                                                                                                                                                                                                                                                                                                                                                                                                                                                                                                                                                                                                                                                                                                                                                                                                                                              | [M-H]+   | 231.02655 | C7H12O6      | Quinic acids and derivatives         | AAWZDTNLSGCEK-LNVDRNJUSA-N  | O=C(O)C1(C)CC(O)C(O)C(O)C1                                                                    |
| 2516 | 14.043 | 497.35797 | Soyasapogenol A                                                                                                                                                                                                                                                                                                                                                                                                                                                                                                                                                                                                                                                                                                                                                                                                                                                                                                                                                                                                                                                                                                                                                                                                                                                                                                                                                                                                                                                                                                                                                                                                                                                                                                                                                                                                                                                                                                                                                                                                                                                                                                                                                                                                                                                                                                                                                                                                                                                                                                                                                                                                                                                                                                                                                                                                                                                                                                                                                                                                                                                                                                                                                                                                                                                                                                                                                                                                                                                                                                                                                                                                                                                                                                                                                                                                                                                                                                                                                                                                                                                                                                                                                                                                                                                                                                                                                                                                                                                                                                                                                                                                                                                                                                                                                                                                                                                                                                                                                                                                                                                                                                                                                                                                                                                                                                                                                                                                                                                                                                                                                                                                                                                                                                                                                                                                | [M-H]+   | 497.35999 | C30H50O4     | Triterpenoids                        | CDWRAYFUPQLRZ-UHFFFAOYSA-N  | OC[C@](C)C(OC)CC2(C)C1CC3(C)C2CC=C4C5OC(C)C(O)C(C)C5(C)CC43C                                  |
| 2517 | 14.067 | 595.25153 | 6-(furan-3-yl)-12,16,21-trihydroxy-7,15-dimethyl-9-oxo-3,17,19-trioxahentacyclo[9.9.3.0]2,9.0]2,9.0]2,9.0]2,9.0]2,9.0]2,9.0]2,9.0]2,9.0]2,9.0]2,9.0]2,9.0]2,9.0]2,9.0]2,9.0]2,9.0]2,9.0]2,9.0]2,9.0]2,9.0]2,9.0]2,9.0]2,9.0]2,9.0]2,9.0]2,9.0]2,9.0]2,9.0]2,9.0]2,9.0]2,9.0]2,9.0]2,9.0]2,9.0]2,9.0]2,9.0]2,9.0]2,9.0]2,9.0]2,9.0]2,9.0]2,9.0]2,9.0]2,9.0]2,9.0]2,9.0]2,9.0]2,9.0]2,9.0]2,9.0]2,9.0]2,9.0]2,9.0]2,9.0]2,9.0]2,9.0]2,9.0]2,9.0]2,9.0]2,9.0]2,9.0]2,9.0]2,9.0]2,9.0]2,9.0]2,9.0]2,9.0]2,9.0]2,9.0]2,9.0]2,9.0]2,9.0]2,9.0]2,9.0]2,9.0]2,9.0]2,9.0]2,9.0]2,9.0]2,9.0]2,9.0]2,9.0]2,9.0]2,9.0]2,9.0]2,9.0]2,9.0]2,9.0]2,9.0]2,9.0]2,9.0]2,9.0]2,9.0]2,9.0]2,9.0]2,9.0]2,9.0]2,9.0]2,9.0]2,9.0]2,9.0]2,9.0]2,9.0]2,9.0]2,9.0]2,9.0]2,9.0]2,9.0]2,9.0]2,9.0]2,9.0]2,9.0]2,9.0]2,9.0]2,9.0]2,9.0]2,9.0]2,9.0]2,9.0]2,9.0]2,9.0]2,9.0]2,9.0]2,9.0]2,9.0]2,9.0]2,9.0]2,9.0]2,9.0]2,9.0]2,9.0]2,9.0]2,9.0]2,9.0]2,9.0]2,9.0]2,9.0]2,9.0]2,9.0]2,9.0]2,9.0]2,9.0]2,9.0]2,9.0]2,9.0]2,9.0]2,9.0]2,9.0]2,9.0]2,9.0]2,9.0]2,9.0]2,9.0]2,9.0]2,9.0]2,9.0]2,9.0]2,9.0]2,9.0]2,9.0]2,9.0]2,9.0]2,9.0]2,9.0]2,9.0]2,9.0]2,9.0]2,9.0]2,9.0]2,9.0]2,9.0]2,9.0]2,9.0]2,9.0]2,9.0]2,9.0]2,9.0]2,9.0]2,9.0]2,9.0]2,9.0]2,9.0]2,9.0]2,9.0]2,9.0]2,9.0]2,9.0]2,9.0]2,9.0]2,9.0]2,9.0]2,9.0]2,9.0]2,9.0]2,9.0]2,9.0]2,9.0]2,9.0]2,9.0]2,9.0]2,9.0]2,9.0]2,9.0]2,9.0]2,9.0]2,9.0]2,9.0]2,9.0]2,9.0]2,9.0]2,9.0]2,9.0]2,9.0]2,9.0]2,9.0]2,9.0]2,9.0]2,9.0]2,9.0]2,9.0]2,9.0]2,9.0]2,9.0]2,9.0]2,9.0]2,9.0]2,9.0]2,9.0]2,9.0]2,9.0]2,9.0]2,9.0]2,9.0]2,9.0]2,9.0]2,9.0]2,9.0]2,9.0]2,9.0]2,9.0]2,9.0]2,9.0]2,9.0]2,9.0]2,9.0]2,9.0]2,9.0]2,9.0]2,9.0]2,9.0]2,9.0]2,9.0]2,9.0]2,9.0]2,9.0]2,9.0]2,9.0]2,9.0]2,9.0]2,9.0]2,9.0]2,9.0]2,9.0]2,9.0]2,9.0]2,9.0]2,9.0]2,9.0]2,9.0]2,9.0]2,9.0]2,9.0]2,9.0]2,9.0]2,9.0]2,9.0]2,9.0]2,9.0]2,9.0]2,9.0]2,9.0]2,9.0]2,9.0]2,9.0]2,9.0]2,9.0]2,9.0]2,9.0]2,9.0]2,9.0]2,9.0]2,9.0]2,9.0]2,9.0]2,9.0]2,9.0]2,9.0]2,9.0]2,9.0]2,9.0]2,9.0]2,9.0]2,9.0]2,9.0]2,9.0]2,9.0]2,9.0]2,9.0]2,9.0]2,9.0]2,9.0]2,9.0]2,9.0]2,9.0]2,9.0]2,9.0]2,9.0]2,9.0]2,9.0]2,9.0]2,9.0]2,9.0]2,9.0]2,9.0]2,9.0]2,9.0]2,9.0]2,9.0]2,9.0]2,9.0]2,9.0]2,9.0]2,9.0]2,9.0]2,9.0]2,9.0]2,9.0]2,9.0]2,9.0]2,9.0]2,9.0]2,9.0]2,9.0]2,9.0]2,9.0]2,9.0]2,9.0]2,9.0]2,9.0]2,9.0]2,9.0]2,9.0]2,9.0]2,9.0]2,9.0]2,9.0]2,9.0]2,9.0]2,9.0]2,9.0]2,9.0]2,9.0]2,9.0]2,9.0]2,9.0]2,9.0]2,9.0]2,9.0]2,9.0]2,9.0]2,9.0]2,9.0]2,9.0]2,9.0]2,9.0]2,9.0]2,9.0]2,9.0]2,9.0]2,9.0]2,9.0]2,9.0]2,9.0]2,9.0]2,9.0]2,9.0]2,9.0]2,9.0]2,9.0]2,9.0]2,9.0]2,9.0]2,9.0]2,9.0]2,9.0]2,9.0]2,9.0]2,9.0]2,9.0]2,9.0]2,9.0]2,9.0]2,9.0]2,9.0]2,9.0]2,9.0]2,9.0]2,9.0]2,9.0]2,9.0]2,9.0]2,9.0]2,9.0]2,9.0]2,9.0]2,9.0]2,9.0]2,9.0]2,9.0]2,9.0]2,9.0]2,9.0]2,9.0]2,9.0]2,9.0]2,9.0]2,9.0]2,9.0]2,9.0]2,9.0]2,9.0]2,9.0]2,9.0]2,9.0]2,9.0]2,9.0]2,9.0]2,9.0]2,9.0]2,9.0]2,9.0]2,9.0]2,9.0]2,9.0]2,9.0]2,9.0]2,9.0]2,9.0]2,9.0]2,9.0]2,9.0]2,9.0]2,9.0]2,9.0]2,9.0]2,9.0]2,9.0]2,9.0]2,9.0]2,9.0]2,9.0]2,9.0]2,9.0]2,9.0]2,9.0]2,9.0]2,9.0]2,9.0]2,9.0]2,9.0]2,9.0]2,9.0]2,9.0]2,9.0]2,9.0]2,9.0]2,9.0]2,9.0]2,9.0]2,9.0]2,9.0]2,9.0]2,9.0]2,9.0]2,9.0]2,9.0]2,9.0]2,9.0]2,9.0]2,9.0]2,9.0]2,9.0]2,9.0]2,9.0]2,9.0]2,9.0]2,9.0]2,9.0]2,9.0]2,9.0]2,9.0]2,9.0]2,9.0]2,9.0]2,9.0]2,9.0]2,9.0]2,9.0]2,9.0]2,9.0]2,9.0]2,9.0]2,9.0]2,9.0]2,9.0]2,9.0]2,9.0]2,9.0]2,9.0]2,9.0]2,9.0]2,9.0]2,9.0]2,9.0]2,9.0]2,9.0]2,9.0]2,9.0]2,9.0]2,9.0]2,9.0]2,9.0]2,9.0]2,9.0]2,9.0]2,9.0]2,9.0]2,9.0]2,9.0]2,9.0]2,9.0]2,9.0]2,9.0]2,9.0]2,9.0]2,9.0]2,9.0]2,9.0]2,9.0]2,9.0]2,9.0]2,9.0]2,9.0]2,9.0]2,9.0]2,9.0]2,9.0]2,9.0]2,9.0]2,9.0]2,9.0]2,9.0]2,9.0]2,9.0]2,9.0]2,9.0]2,9.0]2,9.0]2,9.0]2,9.0]2,9.0]2,9.0]2,9.0]2,9.0]2,9.0]2,9.0]2,9.0]2,9.0]2,9.0]2,9.0]2,9.0]2,9.0]2,9.0]2,9.0]2,9.0]2,9.0]2,9.0]2,9.0]2,9.0]2,9.0]2,9.0]2,9.0]2,9.0]2,9.0]2,9.0]2,9.0]2,9.0]2,9.0]2,9.0]2,9.0]2,9.0]2,9.0]2,9.0]2,9.0]2,9.0]2,9.0]2,9.0]2,9.0]2,9.0]2,9.0]2,9.0]2,9.0]2,9.0]2,9.0]2,9.0]2,9.0]2,9.0]2,9.0]2,9.0]2,9.0]2,9.0]2,9.0]2,9.0]2,9.0]2,9.0]2,9.0]2,9.0]2,9.0]2,9.0]2,9.0]2,9.0]2,9.0]2,9.0]2,9.0]2,9.0]2,9.0]2,9.0]2,9.0]2,9.0]2,9.0]2,9.0]2,9.0]2,9.0]2,9.0]2,9.0]2,9.0]2,9.0]2,9.0]2,9.0]2,9.0]2,9.0]2,9.0]2,9.0]2,9.0]2,9.0]2,9.0]2,9.0]2,9.0]2,9.0]2,9.0]2,9.0]2,9.0]2,9.0]2,9.0]2,9.0]2,9.0]2,9.0]2,9.0]2,9.0]2,9.0]2,9.0]2,9.0]2,9.0]2,9.0]2,9.0]2,9.0]2,9.0]2,9.0]2,9.0]2,9.0]2,9.0]2,9.0]2,9.0]2,9.0]2,9.0]2,9.0]2,9.0]2,9.0]2,9.0]2,9.0]2,9.0]2,9.0]2,9.0]2,9.0]2,9.0]2,9.0]2,9.0]2,9.0]2,9.0]2,9.0]2,9.0]2,9.0]2,9.0]2,9.0]2,9.0]2,9.0]2,9.0]2,9.0]2,9.0]2,9.0]2,9.0]2,9.0]2,9.0]2,9.0]2,9.0]2,9.0]2,9.0]2,9.0]2,9.0]2,9.0]2,9.0]2,9.0]2,9.0]2,9.0]2,9.0]2,9.0]2,9.0]2,9.0]2,9.0]2,9.0]2,9.0]2,9.0]2,9.0]2,9.0]2,9.0]2,9.0]2,9.0]2,9.0]2,9.0]2,9.0]2,9.0]2,9.0]2,9.0]2,9.0]2,9.0]2,9.0]2,9.0]2,9.0]2,9.0]2,9.0]2,9.0]2,9.0]2,9.0]2,9.0]2,9.0]2,9.0]2,9.0]2,9.0]2,9.0]2,9.0]2,9.0]2,9.0]2,9.0]2,9.0]2,9.0]2,9.0]2,9.0]2,9.0]2,9.0]2,9.0]2,9.0]2,9.0]2,9.0]2,9.0]2,9.0]2,9.0]2,9.0]2,9.0]2,9.0]2,9.0]2,9.0]2,9.0]2,9.0]2,9.0]2,9.0]2,9.0]2,9.0]2,9.0]2,9.0]2,9.0]2,9.0]2,9.0]2,9.0]2,9.0]2,9.0]2,9.0]2,9.0]2,9.0]2,9.0]2,9.0]2,9.0]2,9.0]2,9.0]2,9.0]2,9.0]2,9.0]2,9.0]2,9.0]2,9.0]2,9.0]2,9.0]2,9.0]2,9.0]2,9.0]2,9.0]2,9.0]2,9.0]2,9.0]2,9.0]2,9.0]2,9.0]2,9.0]2,9.0]2,9.0]2,9.0]2,9.0]2,9.0]2,9.0]2,9.0]2,9.0]2,9.0]2,9.0]2,9.0]2,9.0]2,9.0]2,9.0]2,9.0]2,9.0]2,9.0]2,9.0]2,9.0]2,9.0]2,9.0]2,9.0]2,9.0]2,9.0]2,9.0]2,9.0]2,9.0]2,9.0]2,9.0]2,9.0]2,9.0]2,9.0]2,9.0]2,9.0]2,9.0]2,9.0]2,9.0]2,9.0]2,9.0]2,9.0]2,9.0]2,9.0]2,9.0]2,9.0]2,9.0]2,9.0]2,9.0]2,9.0]2,9.0]2,9.0]2,9.0]2,9.0]2,9.0]2,9.0]2,9.0]2,9.0]2,9.0]2,9.0]2,9.0]2,9.0]2,9.0]2,9.0]2,9.0]2,9.0]2,9.0]2,9.0]2,9.0]2,9.0]2,9.0]2,9.0]2,9.0]2,9.0]2,9.0]2,9.0]2,9.0]2,9.0]2,9.0]2,9.0]2,9.0]2,9.0]2,9.0]2,9.0]2,9.0]2,9.0]2,9.0]2,9.0]2,9.0]2,9.0]2,9.0]2,9.0]2,9.0]2,9.0]2,9.0]2,9.0]2,9. |          |           |              |                                      |                             |                                                                                               |

|      |        |           |                                                                                                              |                    |           |          |                 |                            |                                                                                                                                                                                                                                                                                                                                                                                                                                                                                                                                                                                                                                                                                                                                                                                                                                                                                                                                                                                                                                                                                                                                                                                                                                                                                                                                                                                                                                                                                                                                                                                                                                                                                                                                                                                                                                                                                                                                                                                                                                                                                                                                                                                                                                                                                                                                                                                                                                                                                                                                                                                                                                                                                                                                                                                                                                                                                                                                                                                                                                                                                                                                                                                                                                                                                                                                                                                                                                                                                                                                                                                                                                                                                                                                                                                                                                                                                                                                                                                                                                                                                                                                                                                                                                                                                                                                                                                                                                                                                                                                                                                                                                                                                                                                                                                                                                                                                                                                                                                                                                                                                                                                                                                                                                                                                                                                                                                                                                                                                                                                                                                                                                                                                                                                                         |
|------|--------|-----------|--------------------------------------------------------------------------------------------------------------|--------------------|-----------|----------|-----------------|----------------------------|---------------------------------------------------------------------------------------------------------------------------------------------------------------------------------------------------------------------------------------------------------------------------------------------------------------------------------------------------------------------------------------------------------------------------------------------------------------------------------------------------------------------------------------------------------------------------------------------------------------------------------------------------------------------------------------------------------------------------------------------------------------------------------------------------------------------------------------------------------------------------------------------------------------------------------------------------------------------------------------------------------------------------------------------------------------------------------------------------------------------------------------------------------------------------------------------------------------------------------------------------------------------------------------------------------------------------------------------------------------------------------------------------------------------------------------------------------------------------------------------------------------------------------------------------------------------------------------------------------------------------------------------------------------------------------------------------------------------------------------------------------------------------------------------------------------------------------------------------------------------------------------------------------------------------------------------------------------------------------------------------------------------------------------------------------------------------------------------------------------------------------------------------------------------------------------------------------------------------------------------------------------------------------------------------------------------------------------------------------------------------------------------------------------------------------------------------------------------------------------------------------------------------------------------------------------------------------------------------------------------------------------------------------------------------------------------------------------------------------------------------------------------------------------------------------------------------------------------------------------------------------------------------------------------------------------------------------------------------------------------------------------------------------------------------------------------------------------------------------------------------------------------------------------------------------------------------------------------------------------------------------------------------------------------------------------------------------------------------------------------------------------------------------------------------------------------------------------------------------------------------------------------------------------------------------------------------------------------------------------------------------------------------------------------------------------------------------------------------------------------------------------------------------------------------------------------------------------------------------------------------------------------------------------------------------------------------------------------------------------------------------------------------------------------------------------------------------------------------------------------------------------------------------------------------------------------------------------------------------------------------------------------------------------------------------------------------------------------------------------------------------------------------------------------------------------------------------------------------------------------------------------------------------------------------------------------------------------------------------------------------------------------------------------------------------------------------------------------------------------------------------------------------------------------------------------------------------------------------------------------------------------------------------------------------------------------------------------------------------------------------------------------------------------------------------------------------------------------------------------------------------------------------------------------------------------------------------------------------------------------------------------------------------------------------------------------------------------------------------------------------------------------------------------------------------------------------------------------------------------------------------------------------------------------------------------------------------------------------------------------------------------------------------------------------------------------------------------------------------------------------------|
| 2536 | 14.413 | 421.27527 | 3-[(7S,8S)-5-hydroxy-2,2,1,8-tetramethyl-6-oxo-7,8-dihydroprano[3,2-b]chromen-10-yl]-3,4-dihydrobenzoic acid | [M-H] <sup>-</sup> | 421.27563 | C25H2606 | Pyranochromenes | CEJSHVIZUAMEQY-CBVZESEGA-N | O=C(O)CC(C=C(C=CC1)C=C(C2=C(C3=C(C4=C(C5=C(C6=C(C7=C(C8=C(C9=C(C10=C(C11=C(C12=C(C13=C(C14=C(C15=C(C16=C(C17=C(C18=C(C19=C(C20=C(C21=C(C22=C(C23=C(C24=C(C25=C(C26=C(C27=C(C28=C(C29=C(C30=C(C31=C(C32=C(C33=C(C34=C(C35=C(C36=C(C37=C(C38=C(C39=C(C40=C(C41=C(C42=C(C43=C(C44=C(C45=C(C46=C(C47=C(C48=C(C49=C(C50=C(C51=C(C52=C(C53=C(C54=C(C55=C(C56=C(C57=C(C58=C(C59=C(C60=C(C61=C(C62=C(C63=C(C64=C(C65=C(C66=C(C67=C(C68=C(C69=C(C70=C(C71=C(C72=C(C73=C(C74=C(C75=C(C76=C(C77=C(C78=C(C79=C(C80=C(C81=C(C82=C(C83=C(C84=C(C85=C(C86=C(C87=C(C88=C(C89=C(C90=C(C91=C(C92=C(C93=C(C94=C(C95=C(C96=C(C97=C(C98=C(C99=C(C100=C(C101=C(C102=C(C103=C(C104=C(C105=C(C106=C(C107=C(C108=C(C109=C(C110=C(C111=C(C112=C(C113=C(C114=C(C115=C(C116=C(C117=C(C118=C(C119=C(C120=C(C121=C(C122=C(C123=C(C124=C(C125=C(C126=C(C127=C(C128=C(C129=C(C130=C(C131=C(C132=C(C133=C(C134=C(C135=C(C136=C(C137=C(C138=C(C139=C(C140=C(C141=C(C142=C(C143=C(C144=C(C145=C(C146=C(C147=C(C148=C(C149=C(C150=C(C151=C(C152=C(C153=C(C154=C(C155=C(C156=C(C157=C(C158=C(C159=C(C160=C(C161=C(C162=C(C163=C(C164=C(C165=C(C166=C(C167=C(C168=C(C169=C(C170=C(C171=C(C172=C(C173=C(C174=C(C175=C(C176=C(C177=C(C178=C(C179=C(C180=C(C181=C(C182=C(C183=C(C184=C(C185=C(C186=C(C187=C(C188=C(C189=C(C190=C(C191=C(C192=C(C193=C(C194=C(C195=C(C196=C(C197=C(C198=C(C199=C(C200=C(C201=C(C202=C(C203=C(C204=C(C205=C(C206=C(C207=C(C208=C(C209=C(C210=C(C211=C(C212=C(C213=C(C214=C(C215=C(C216=C(C217=C(C218=C(C219=C(C220=C(C221=C(C222=C(C223=C(C224=C(C225=C(C226=C(C227=C(C228=C(C229=C(C230=C(C231=C(C232=C(C233=C(C234=C(C235=C(C236=C(C237=C(C238=C(C239=C(C240=C(C241=C(C242=C(C243=C(C244=C(C245=C(C246=C(C247=C(C248=C(C249=C(C250=C(C251=C(C252=C(C253=C(C254=C(C255=C(C256=C(C257=C(C258=C(C259=C(C260=C(C261=C(C262=C(C263=C(C264=C(C265=C(C266=C(C267=C(C268=C(C269=C(C270=C(C271=C(C272=C(C273=C(C274=C(C275=C(C276=C(C277=C(C278=C(C279=C(C280=C(C281=C(C282=C(C283=C(C284=C(C285=C(C286=C(C287=C(C288=C(C289=C(C290=C(C291=C(C292=C(C293=C(C294=C(C295=C(C296=C(C297=C(C298=C(C299=C(C300=C(C301=C(C302=C(C303=C(C304=C(C305=C(C306=C(C307=C(C308=C(C309=C(C310=C(C311=C(C312=C(C313=C(C314=C(C315=C(C316=C(C317=C(C318=C(C319=C(C320=C(C321=C(C322=C(C323=C(C324=C(C325=C(C326=C(C327=C(C328=C(C329=C(C330=C(C331=C(C332=C(C333=C(C334=C(C335=C(C336=C(C337=C(C338=C(C339=C(C340=C(C341=C(C342=C(C343=C(C344=C(C345=C(C346=C(C347=C(C348=C(C349=C(C350=C(C351=C(C352=C(C353=C(C354=C(C355=C(C356=C(C357=C(C358=C(C359=C(C360=C(C361=C(C362=C(C363=C(C364=C(C365=C(C366=C(C367=C(C368=C(C369=C(C370=C(C371=C(C372=C(C373=C(C374=C(C375=C(C376=C(C377=C(C378=C(C379=C(C380=C(C381=C(C382=C(C383=C(C384=C(C385=C(C386=C(C387=C(C388=C(C389=C(C390=C(C391=C(C392=C(C393=C(C394=C(C395=C(C396=C(C397=C(C398=C(C399=C(C400=C(C401=C(C402=C(C403=C(C404=C(C405=C(C406=C(C407=C(C408=C(C409=C(C410=C(C411=C(C412=C(C413=C(C414=C(C415=C(C416=C(C417=C(C418=C(C419=C(C420=C(C421=C(C422=C(C423=C(C424=C(C425=C(C426=C(C427=C(C428=C(C429=C(C430=C(C431=C(C432=C(C433=C(C434=C(C435=C(C436=C(C437=C(C438=C(C439=C(C440=C(C441=C(C442=C(C443=C(C444=C(C445=C(C446=C(C447=C(C448=C(C449=C(C450=C(C451=C(C452=C(C453=C(C454=C(C455=C(C456=C(C457=C(C458=C(C459=C(C460=C(C461=C(C462=C(C463=C(C464=C(C465=C(C466=C(C467=C(C468=C(C469=C(C470=C(C471=C(C472=C(C473=C(C474=C(C475=C(C476=C(C477=C(C478=C(C479=C(C480=C(C481=C(C482=C(C483=C(C484=C(C485=C(C486=C(C487=C(C488=C(C489=C(C490=C(C491=C(C492=C(C493=C(C494=C(C495=C(C496=C(C497=C(C498=C(C499=C(C500=C(C501=C(C502=C(C503=C(C504=C(C505=C(C506=C(C507=C(C508=C(C509=C(C510=C(C511=C(C512=C(C513=C(C514=C(C515=C(C516=C(C517=C(C518=C(C519=C(C520=C(C521=C(C522=C(C523=C(C524=C(C525=C(C526=C(C527=C(C528=C(C529=C(C530=C(C531=C(C532=C(C533=C(C534=C(C535=C(C536=C(C537=C(C538=C(C539=C(C540=C(C541=C(C542=C(C543=C(C544=C(C545=C(C546=C(C547=C(C548=C(C549=C(C550=C(C551=C(C552=C(C553=C(C554=C(C555=C(C556=C(C557=C(C558=C(C559=C(C560=C(C561=C(C562=C(C563=C(C564=C(C565=C(C566=C(C567=C(C568=C(C569=C(C570=C(C571=C(C572=C(C573=C(C574=C(C575=C(C576=C(C577=C(C578=C(C579=C(C580=C(C581=C(C582=C(C583=C(C584=C(C585=C(C586=C(C587=C(C588=C(C589=C(C590=C(C591=C(C592=C(C593=C(C594=C(C595=C(C596=C(C597=C(C598=C(C599=C(C600=C(C601=C(C602=C(C603=C(C604=C(C605=C(C606=C(C607=C(C608=C(C609=C(C610=C(C611=C(C612=C(C613=C(C614=C(C615=C(C616=C(C617=C(C618=C(C619=C(C620=C(C621=C(C622=C(C623=C(C624=C(C625=C(C626=C(C627=C(C628=C(C629=C(C630=C(C631=C(C632=C(C633=C(C634=C(C635=C(C636=C(C637=C(C638=C(C639=C(C640=C(C641=C(C642=C(C643=C(C644=C(C645=C(C646=C(C647=C(C648=C(C649=C(C650=C(C651=C(C652=C(C653=C(C654=C(C655=C(C656=C(C657=C(C658=C(C659=C(C660=C(C661=C(C662=C(C663=C(C664=C(C665=C(C666=C(C667=C(C668=C(C669=C(C670=C(C671=C(C672=C(C673=C(C674=C(C675=C(C676=C(C677=C(C678=C(C679=C(C680=C(C681=C(C682=C(C683=C(C684=C(C685=C(C686=C(C687=C(C688=C(C689=C(C690=C(C691=C(C692=C(C693=C(C694=C(C695=C(C696=C(C697=C(C698=C(C699=C(C700=C(C701=C(C702=C(C703=C(C704=C(C705=C(C706=C(C707=C(C708=C(C709=C(C710=C(C711=C(C712=C(C713=C(C714=C(C715=C(C716=C(C717=C(C718=C(C719=C(C720=C(C721=C(C722=C(C723=C(C724=C(C725=C(C726=C(C727=C(C728=C(C729=C(C730=C(C731=C(C732=C(C733=C(C734=C(C735=C(C736=C(C737=C(C738=C(C739=C(C740=C(C741=C(C742=C(C743=C(C744=C(C745=C(C746=C(C747=C(C748=C(C749=C(C750=C(C751=C(C752=C(C753=C(C754=C(C755=C(C756=C(C757=C(C758=C(C759=C(C760=C(C761=C(C762=C(C763=C(C764=C(C765=C(C766=C(C767=C(C768=C(C769=C(C770=C(C771=C(C772=C(C773=C(C774=C(C775=C(C776=C(C777=C(C778=C(C779=C(C780=C(C781=C(C782=C(C783=C(C784=C(C785=C(C786=C(C787=C(C788=C(C789=C(C790=C(C791=C(C792=C(C793=C(C794=C(C795=C(C796=C(C797=C(C798=C(C799=C(C800=C(C801=C(C802=C(C80 |
|------|--------|-----------|--------------------------------------------------------------------------------------------------------------|--------------------|-----------|----------|-----------------|----------------------------|---------------------------------------------------------------------------------------------------------------------------------------------------------------------------------------------------------------------------------------------------------------------------------------------------------------------------------------------------------------------------------------------------------------------------------------------------------------------------------------------------------------------------------------------------------------------------------------------------------------------------------------------------------------------------------------------------------------------------------------------------------------------------------------------------------------------------------------------------------------------------------------------------------------------------------------------------------------------------------------------------------------------------------------------------------------------------------------------------------------------------------------------------------------------------------------------------------------------------------------------------------------------------------------------------------------------------------------------------------------------------------------------------------------------------------------------------------------------------------------------------------------------------------------------------------------------------------------------------------------------------------------------------------------------------------------------------------------------------------------------------------------------------------------------------------------------------------------------------------------------------------------------------------------------------------------------------------------------------------------------------------------------------------------------------------------------------------------------------------------------------------------------------------------------------------------------------------------------------------------------------------------------------------------------------------------------------------------------------------------------------------------------------------------------------------------------------------------------------------------------------------------------------------------------------------------------------------------------------------------------------------------------------------------------------------------------------------------------------------------------------------------------------------------------------------------------------------------------------------------------------------------------------------------------------------------------------------------------------------------------------------------------------------------------------------------------------------------------------------------------------------------------------------------------------------------------------------------------------------------------------------------------------------------------------------------------------------------------------------------------------------------------------------------------------------------------------------------------------------------------------------------------------------------------------------------------------------------------------------------------------------------------------------------------------------------------------------------------------------------------------------------------------------------------------------------------------------------------------------------------------------------------------------------------------------------------------------------------------------------------------------------------------------------------------------------------------------------------------------------------------------------------------------------------------------------------------------------------------------------------------------------------------------------------------------------------------------------------------------------------------------------------------------------------------------------------------------------------------------------------------------------------------------------------------------------------------------------------------------------------------------------------------------------------------------------------------------------------------------------------------------------------------------------------------------------------------------------------------------------------------------------------------------------------------------------------------------------------------------------------------------------------------------------------------------------------------------------------------------------------------------------------------------------------------------------------------------------------------------------------------------------------------------------------------------------------------------------------------------------------------------------------------------------------------------------------------------------------------------------------------------------------------------------------------------------------------------------------------------------------------------------------------------------------------------------------------------------------------------------------------------|

[illegible]

|      |        |           |                                                                                                                                                                                                                                                        |                    |           |               |                                        |                             |                                                                                                       |
|------|--------|-----------|--------------------------------------------------------------------------------------------------------------------------------------------------------------------------------------------------------------------------------------------------------|--------------------|-----------|---------------|----------------------------------------|-----------------------------|-------------------------------------------------------------------------------------------------------|
|      |        |           | (3S)-5-[(1R,2R,8aS)-2-hydroxy-2,5,8a-tetramethyl-3,4,4a,6,7,8-hexahydro-1H-naphthalen-1-yl]-3-methylnicotanoic acid                                                                                                                                    | [M-H] <sup>+</sup> | 325.27371 | C20H36O3      | Diterpenoids                           | KHCOSRVJDOANA-ZOSGAXDSSA-N  | O=C(O)CC(C)CCC1C(C)(C)CCCC12C                                                                         |
| 2623 | 15.329 | 802.52032 | Scytophycin B                                                                                                                                                                                                                                          | [M-H] <sup>-</sup> | 802.51599 | C45H73NO12    | Diterpene lactones                     | LGYQYCWQMRLJJ-DAAXTDNESA-N  | O-CN(CC(=O)C(C)OC(C)=O)CCC(C)(C)C(C)C1OC(=O)C-C=CC(C)C(C)CC2OC(C=CC2)C(C)C(C)C(C)C(C)C(C)C(C)C(C)     |
| 2624 | 15.386 | 372.28827 | Buxtamine                                                                                                                                                                                                                                              | [M-H] <sup>+</sup> | 372.29001 | C24H37NO2     | Triterpenoids                          | KTASKRCJBGXHM-WMYNZDBHS-A   | O=C(C)C1C(C)CC(C)C3CCOC4=C(C)(NC)OCC54C3SCCO12C                                                       |
| 2625 | 15.407 | 378.33545 | Ursocholic Acid                                                                                                                                                                                                                                        | [M-H] <sup>+</sup> | 378.33664 | C24H40O2      | Bile acids, alcohols and derivatives   | RPKLZQLYOUPWTW-LVVAJZHISA-N | O=C(O)CCC(C)C1CCC2C3CCC4CCCC4(C)C3CCC12C                                                              |
| 2626 | 15.418 | 363.28772 | 2-methoxy-4-pentadecylbenzoic acid                                                                                                                                                                                                                     | [M-H] <sup>+</sup> | 363.289   | C23H38O3      | 0-methoxybenzoic acids and derivatives | HGXGHYZLPCLUJI-UHHFFAOYSA-N | O=C(O)C1=CC=C(C=C1)CCCCCCCCCC                                                                         |
| 2627 | 15.423 | 397.34457 | Ergosterol                                                                                                                                                                                                                                             | [M-H] <sup>+</sup> | 397.3465  | C28H44O       | Ergosterols and derivatives            | DNPYPKGSXYMLRS-UHHFFAOYNA-N | OC1CC2=CC=C3C(CCC4(C)C3CCC4=C(C)C(C)C(C)C2(C)CC1                                                      |
| 2628 | 15.447 | 432.35431 | korseveriline                                                                                                                                                                                                                                          | [M-H] <sup>+</sup> | 432.35001 | C27H45NO3     | Cerveratrum-type alkaloids             | NGVOUYEGZOZEN-CADWWJYS-A    | OC1CCC2(C)C(C)C(C)OC3AC2C4C5CNBCC(C)CCC6(C)C5CCC43O                                                   |
| 2629 | 15.449 | 437.37778 | (3beta)-stigmast-5-en-3-ol                                                                                                                                                                                                                             | [M-H] <sup>+</sup> | 437.38    | C29H50O       | Stigmasteranes and derivatives         | KZJWDPNJALLNS-VJSFXLFPS-A   | OC1CC2=CCC3C(CCC4(C)C(C)CCC4)C(C)CCC(C)(C)C(C)C2(C)C                                                  |
| 2630 | 15.45  | 607.25134 | 3-(2-((3-{(2-carboxyethyl)-4-methyl-5-oxo-4-vinyl-1H-pyrrol-2(5H)-ylidene)methyl}-1H-pyrrol-2-yl)methyl)-4-methyl-5-(4)-(4-                                                                                                                            | [M-H] <sup>+</sup> | 607.25    | C33H36N4O6    | Billirubins                            | BPYKITZIUTYGOLF-IDASCNNAS-N | O=C(O)CC1=C(NC(C=C2NC(=O)C(C=C2)C)C(C)OC(=O)3NC(C=N C(=O))C(C)=C4C=C(C3CCTC(=O)O))C                   |
| 2631 | 15.491 | 398.34741 | Solanidine (not validated)                                                                                                                                                                                                                             | [M-H] <sup>+</sup> | 398.34091 | C27H43NO      | Steroidal saponins                     | JVKYIZPBMZFJNJ-UHHFFAOYNA-N | OC6OC5=CC4C(CCC3(C)(C4(C2N1C(C)CC1C(C)C23)))C5(C)C O6                                                 |
| 2632 | 15.502 | 285.21609 | Acacetin                                                                                                                                                                                                                                               | [M-H] <sup>+</sup> | 285.21265 | C16H12O5      | 4'-O-methylated flavonoids             | DANYIYRPLHOXC-UHHFFAOYSA-N  | O=C1C=C(OC=2C=C(O)C=C(O)C12)C=3C=CC(OC)=CC3                                                           |
| 2633 | 15.541 | 917.53845 | Notoginsenoside Ftl                                                                                                                                                                                                                                    | [M-H] <sup>+</sup> | 917.53998 | C47H80O17     | Triterpenoids                          | LXLVPXTOKTYXHUGLCNCSA-N     | OC1OOC(OC2OCC3(C)C(CCC4(C)C3OC(C)C5(CCC54)C(C)OC CC=C(C)C)C2(C)C(C)OC6OC(C)(C)OC7OC7OC(C)(C)C7O)C(C)C |
| 2634 | 15.575 | 698.48297 | 10-[3-acetamido-4,5-dihydroxy-6-(hydroxymethyl)oxan-2-ylo]oxy-5-hydroxy-2,2,6a,6b,9,9,12a-hexamethyl-1,3,4,5,6,6a,7,8,8a,10,11,12,13,14b-                                                                                                              | [M-H] <sup>+</sup> | 698.48602 | C38H61NO9     | Triterpene saponins                    | ZCVZUHMTUSANI-UHHFFAOYSA-N  | O=C(C)C12CCC(C)(C)OC2C3=CC4C5(C)CC(C)OC6OC(C)(C)C7O(C)CBN=C(C)C(C)C(C)C5CC4(C)C3(C)C1O                |
| 2635 | 15.576 | 383.32977 | Cholest-4,6-Dien-3-One                                                                                                                                                                                                                                 | [M-H] <sup>+</sup> | 383.33081 | C27H42O       | Cholesterols and derivatives           | XJWMKRKFYSISJ-GVMKIIDSA-N   | O=C1C=C2C=CC3C(CCC4(C)C3CCC4(C)CCCC(C)C)C2(C)C(C)C1                                                   |
| 2636 | 15.58  | 321.21909 | Bis(2-ethylhexyl)phosphate                                                                                                                                                                                                                             | [M-H] <sup>-</sup> | 321.22003 | C16H35O4P     | Dialkyl phosphates                     | SEGLCEGVDFDPX-UHHFFAOYNA-N  | CCCC(C)COP(O)(=O)OCC(C)CCCC                                                                           |
| 2637 | 15.588 | 591.25671 | 3-[[{3R,5S,10R,13R,14S,17R)-5,14-dihydroxy-10,13-dimethyl-3-[(2R,3R,4S,5S,6R)-3,4,5-trihydroxy-6-(hydroxymethyl)oxan-2-yloxy-(3Z)-3-[[[1,6-dimethyl-2-(1E,3E)-penta-1,3-dienyl]-4a,5,6,7,8,8a-hexahydro-2H-naphthalen-1-yl]]-hydroxymethylidenel-5-(1- | [M-H] <sup>+</sup> | 591.25659 | C29H44O10     | Gardenolid glycosides and derivatives  | PFCZYMDHYKVIA-MHLHJPMSA-N   | O=C1OCC(=O)C2OCC3(C)OC4(C5(C)OC(C)OC6OC(C)(O)C(C)O)C6O OC75(C)C4OCC23C                                |
| 2638 | 15.589 | 398.23196 | {3Z)-3-[[[1,6-dimethyl-2-(1E,3E)-penta-1,3-dienyl]-4a,5,6,7,8,8a-hexahydro-2H-naphthalen-1-yl]]-hydroxymethylidenel-5-(1-                                                                                                                              | [M-H] <sup>-</sup> | 398.23367 | C24H33NO4     | Pyrrolines                             | AIFXSMDWBXFPT-SNXGECCISA-N  | O=C1C(C)O=NC1O(C)=C(O)C2(C)C(C=C(C)C)=CC3CC(C)CCC3 2                                                  |
| 2639 | 15.595 | 357.33517 | conessone                                                                                                                                                                                                                                              | [M-H] <sup>+</sup> | 357.32999 | C24H40N2      | Conanine-type alkaloids                | GPLGAQQNMWMM-CVFNKAMPSA-N   | C1=C2C(N(C)C)CCC2(C)C3CCC45CN(C)C(C)C5CCCC4C3C1                                                       |
| 2640 | 15.635 | 654.18976 | 7-chloro-6'-hydroxy-4,6-dimethoxy-'1,3',8''-trimethyl-5'-(3,4,5-trimethoxyphenyl)-8'',9''-dihydro-1'H-spiro[benzofuran-2,7'-pyrimidinol-4,5'                                                                                                           | [M-H]              | 654.19    | C32H32ClN3O10 | Phenylquinolines                       | BEALVDNRJVATFR-UHHFFAOYSA-N | O=C1C2=C(N=C3C=C(O)C4(C)OC=5C(C1)=C(OC)C(C)OC54=C(O)C(C)C3C2C=C(C)C(=O)C(C)C(C)=C6)N(C(C)O)N1(C)C     |
| 2641 | 15.637 | 653.17877 | [2-[(2S,3R,4S,5S,6R)-3,4,5-trihydroxy-6-(hydroxymethyl)oxan-2-yloxy]phenyl]methyl 6-hydroxy-2-methoxy-3-[3,4,5-trihydroxy-6-                                                                                                                           | [M-H] <sup>+</sup> | 653.18365 | C27H34O16     | Phenolic glycosides                    | WQJLTIVDGZXMHF-XAYMNBSA-N   | O=C(OC)C=C(C)C(C)C1OC2OC(C)(C)OC2O=C3C(O)=CC=C(OC4(C)OC(C)(O)C4O)C3OC                                 |
| 2642 | 15.645 | 463.27945 | Pristimerin derivative                                                                                                                                                                                                                                 | [M-H] <sup>+</sup> | 463.27701 | C30H38O4      | Methyl esters                          | LQBQRDRDYGCBI-RKHSHXAASA-N  | O=C1C=C2C(=CC=C3C4(C)CC(C5(C)CCC(C)=O)OC)CC4C3(C)CC2(C5=C(C)OC(C)C(C)C1)C(C)C                         |
| 2643 | 15.646 | 479.25531 | 6-oxopristimerol derivative                                                                                                                                                                                                                            | [M-H] <sup>+</sup> | 479.25    | C30H38O5      | 3-hydroxysteroids                      | LOTZFUXLMRODN-IUOWYMDSA-N   | O=C1C=C2C=C(C)C4(C)CCC(C(C)=O)OC)CC4C3(C)CC                                                           |

[illegible]

[illegible]

[illegible]

[illegible]

|      |        |           |                                                                                                    |                    |           |              |                                            |                              |                                                                |
|------|--------|-----------|----------------------------------------------------------------------------------------------------|--------------------|-----------|--------------|--------------------------------------------|------------------------------|----------------------------------------------------------------|
| 2837 | 19.834 | 225.06013 | 1,8,9-Anthracenetriol                                                                              | [M-H] <sup>-</sup> | 225.05573 | C14H10O3     | Anthracenes                                | YUTJCNFTO1OGT-UHFFFAOYSA-N   | OC1=CC=CC2=CC3=CC=CC(O)=C3C(O)=C12                             |
| 2838 | 19.835 | 370.72946 | 2-(hydroxymethyl)-6-[[[(1R,4S)-2,4,4-trimethyl-3-oxabicyclo[2.2.2]octan-5-yl]oxloxane-3,4,5-triol] | [M-H] <sup>+</sup> | 370.72919 | C16H28O7     | O-glycosyl compounds                       | NWYZT2HMCWGOF-HLJZFUEWSA-N   | OC(C1OC(OC2CC3CC2(OC3(C)C)C)C(O)C(O)C)C1O                      |
| 2839 | 19.836 | 742.53802 | Phosphatidylethanolamine 18                                                                        | [M-H] <sup>-</sup> | 742.53925 | C41H78NO8P   | Phosphatidylethanolamines                  | CJVLVBK1FVTUPS-JSCMWKRNA-N   | CCCCCCCCCCCCCCCC(=O)OC(COP(O)(=O)OCN)OC(=O)CC(C)/C=C/C(=C)CCCC |
| 2840 | 19.836 | 161.02267 | Salicylic acid                                                                                     | [M+H] <sup>+</sup> | 161.02    | C7H6O3       | Salicylic acids                            | YGSDEFSMJLEOE-UHFFFAOYSA-N   | O=C(O)C=CC=CC1O                                                |
| 2841 | 19.836 | 167.01692 | URATE                                                                                              | [M-H] <sup>-</sup> | 167.021   | C5H4N4O3     | Xanthines                                  | LEHOTFFKMJEONL-UHFFFAOYSA-N  | O=C1NC(=O)C=2NC(=O)NC2N1                                       |
| 2842 | 19.837 | 177.0397  | D-GULONIC ACID GAMA-LACTONE                                                                        | [M-H] <sup>-</sup> | 177.03999 | C6H12O7      | Medium-chain hydroxy acids and derivatives | RGHJNZXEOKURBD-QTBDOELSSA-N  | O=C(O)C(O)C(O)C(O)C(O)CO                                       |
| 2843 | 19.837 | 267.07068 | Norberto Lopes                                                                                     | [M-H] <sup>-</sup> | 267.07001 | C16H12O4     | 4'-O-methylisoflavones                     | HKYGTGCTOTHOMP-UHFFFAOYSA-N  | O=C1C(=COC2=CC(O)=CC=C21)C=3C=CC(OC)=CC3                       |
| 2844 | 19.837 | 117.0185  | Succinic acid (not validated)                                                                      | [M-H] <sup>-</sup> | 117.0182  | C4H6O4       | Organic acids                              | KDYFGRWQYBRFD-UHFFFAOYSA-N   | O=C(O)CCC(=O)O                                                 |
| 2845 | 19.841 | 134.03107 | Thiazolidine-4-carboxylic acid                                                                     | [M+H] <sup>+</sup> | 134.02702 | C4H7NO2S     | L-alpha-amino acids                        | DZLNHFMRPBULJ-UHFFFAOYNA-N   | O=C(O)C1NCSC1                                                  |
| 2846 | 19.842 | 264.08609 | 2,3',4,6-Tetrahydroxybenzophenone                                                                  | [M+H] <sup>+</sup> | 264.08664 | C13H10O5     | Benzophenones                              | QWRYPHZJTQLFX-UHFFFAOYSA-N   | O=C(C1C=CC=C(O)C1)C=2C(O)=CC(O)=CC2O                           |
| 2847 | 19.845 | 223.01393 | (7R,8R)-7,8-dihydroxy-3,5,7-trimethyl-8H-isochromen-6-one                                          | [M+H] <sup>+</sup> | 223.01343 | C12H14O4     | Azaphilones                                | JVUYBLROBJEJN-NEPJUHUUSA-N   | O=C1C(=C2C=C(OC=C2(O)C1(O)C)C)C                                |
| 2848 | 19.845 | 184.01772 | Pesticide1_Acephate_C4H10NO3PS_O,S-Dimethyl acetylphosphoramidothioate                             | [M+H] <sup>+</sup> | 184.019   | C4H10NO3PS   | Organothiophosphorus compounds             | YASYMFAVPKPKE-UHFFFAOYSA-N   | O=P(N=C(O)C)OC)SC                                              |
| 2849 | 19.846 | 327.25266 | 1,2-dihydroxyheptadec-16-yn-4-yl acetate                                                           | [M+H] <sup>+</sup> | 327.25296 | C19H34O4     | Long-chain fatty alcohols                  | FHGZOCZNYHWAL-UHFFFAOYSA-N   | O=C(OC(CCCCCCCCCCCC)CC(O)CO)C                                  |
| 2850 | 19.848 | 101.02376 | 2-Oxobutyric acid                                                                                  | [M-H] <sup>-</sup> | 101.02441 | C4H6O3       | Short-chain keto acids and derivatives     | TYEYBOSBBHJIV-UHFFFAOYSA-N   | CCC(=O)C(O)=O                                                  |
| 2851 | 19.848 | 193.03444 | D-(+)-Galacturonic acid                                                                            | [M-H] <sup>-</sup> | 193.03537 | C6H10O7      | Glucuronic acid derivatives                | AEMOLEFTQBMNLQ-YMDCURPLSA-N  | OC1O[C@H]([C@H](O)[C@H](O)[C@H]1O)C(O)=O                       |
| 2852 | 19.848 | 163.03859 | Umbelliferone                                                                                      | [M+H] <sup>+</sup> | 163.03897 | C9H6O3       | 7-hydroxycoumarins                         | ORHBXUUXSCNDEV-UHFFFAOYSA-N  | OC1=CC2=C(C=C1)C=CC(=O)O2                                      |
| 2853 | 19.851 | 160.04372 | Brompheniramine                                                                                    | [M+H] <sup>+</sup> | 160.04401 | C20H23BrN2O4 | Pheniramines                               | SRGKFVASLQWBO-BTJKTKAUSA-N   | O=C(O)C=C(=O)O.BrC1=CC=C(C=C1)C(C2=NC=CC=C2)CCN(C)C            |
| 2854 | 19.854 | 158.11694 | Homostachydrine                                                                                    | [M+H] <sup>+</sup> | 158.11757 | C8H15NO2     | Alpha amino acids                          | XULZWQRXYTVUTE-ZETCQVMHSA-N  | C[N+](C)CCCC(=C[H]1C(=O)[O-])                                  |
| 2855 | 19.855 | 165.07521 | 1,5-Anhydrosorbitol                                                                                | [M+H] <sup>+</sup> | 165.07574 | C6H12O5      | Monosaccharides                            | MPCAJMNYNOGPB-UHFFFAOYNA-N   | OC1OC(C)C(O)C1O                                                |
| 2856 | 19.859 | 100.11179 | Cyclohexylamine                                                                                    | [M+H] <sup>+</sup> | 100.11208 | C6H13N       | Cyclohexylamines                           | PAFZNILMFXTIMY-UHFFFAOYSA-N  | C1CCC(CC1)N                                                    |
| 2857 | 19.861 | 478.29318 | Phosphatidylethanolamine lyso 18                                                                   | [M-H] <sup>-</sup> | 478.29391 | C23H46NO7P   | 2-acyl-sn-glycero-3-phosphoethanolamines   | FEVAUEZKXSRQS-PFONDGANA-N    | CCCCCCCCCCCCC/C=C/C(=O)OC(CO)COP(O)(=O)OCN                     |
| 2858 | 19.861 | 183.08594 | Sorbitol                                                                                           | [M+H] <sup>+</sup> | 183.08627 | C6H14O6      | Sugar alcohols                             | FDPFZTCFMRRESA-JGWLTMVSA-N   | CCC(O)C(O)C(O)C(O)CO                                           |
| 2859 | 19.862 | 274.27481 | Palmitic Acid                                                                                      | [M+H] <sup>+</sup> | 274.27411 | C16H32O2     | Long-chain fatty acids                     | IPCSVSSVZVIGE-UHFFFAOYSA-N   | O=C(O)CCCCCCCCCCCCC                                            |
| 2860 | 19.862 | 301.23651 | Roccellic Acid                                                                                     | [M+H] <sup>+</sup> | 301.23734 | C17H32O4     | Long-chain fatty acids                     | CADNMISJDLVPCK-LSOHHALUSA-N  | O=C(O)C(C)C(C(=O)O)CCCCCCCCCCCC                                |
| 2861 | 19.864 | 199.01796 | MCPA                                                                                               | [M-H] <sup>-</sup> | 199.01674 | C9H9ClO3     | Chlorophenoxyacetates                      | WHKUVPPKQRBVB-UHFFFAOYSA-N   | CC1=CC(=CC=C1OCC(=O)O)C1                                       |
| 2862 | 19.869 | 284.91183 | Homoptercarpin                                                                                     | [M+H] <sup>+</sup> | 284.91422 | C17H16O4     | 1-benzopyrans                              | GIWAJLOUBQKKA-UHFFFAOYSA-N   | O(C1C=CC2(OC3OC4=CC(OC)=CC=C4C23)=C1)C                         |
| 2863 | 19.873 | 189.03371 | 4-nitroquinoline 1-oxide                                                                           | [M-H] <sup>-</sup> | 189.03056 | C9H6N2O3     | 4-nitroquinoline N-oxides                  | YHQDZJICGQWFKH-UHFFFAOYSA-N  | O=N(=O)C1=CC=N(=O)C=2C=CC=CC12                                 |
| 2864 | 19.892 | 167.99811 | 2-Mercaptobenzothiazole                                                                            | [M+H] <sup>+</sup> | 167.99362 | C7H5NS2      | Benzothiazoles                             | YX1WHUQKZSMYRE-UHFFFAOYSA-N  | C1=CC=C2C(=C1)N=C(S)S2                                         |
| 2865 | 19.898 | 83.0601   | 3-Methylpyrazole                                                                                   | [M+H] <sup>+</sup> | 83.06037  | C4H6N2       | Pyrazoles                                  | XKVUYEYANWF1JX-UHFFFAOYSA-N  | CC=C1C=CN1                                                     |
| 2866 | 19.898 | 351.16913 | hirsutanone                                                                                        | [M+H] <sup>+</sup> | 351.16895 | C19H20O5     | Linear diarylheptanoids                    | VWHYFMQJYFLCC-DUXPYHPUSA-N   | O=C(C=CCCC1=CC=C(O)C(O)=C1)CCC2=CC=C(O)C(O)=C2                 |
| 2867 | 19.904 | 265.09631 | D-Tryptophan                                                                                       | [M+H] <sup>+</sup> | 265.09698 | C11H12N2O2   | Indolyl carboxylic acids and derivatives   | Q1VBCCIJJIAJPQS-SECBINFHSA-N | O=C(O)C(N)CC1=CNC=2C=CC=CC21                                   |
| 2868 | 19.904 | 449.26535 | Mappain                                                                                            | [M+H] <sup>+</sup> | 449.26901 | C29H36O4     | Stilbenes                                  | GJZKDVGLDGLPMB-ZVBRSEKESA-N  | OC=1C=C(C=CC2=CC(O)=C(C)=C2)CC=C(C)C=C(C1O)CC=C(C)C(=C(C)C     |
| 2869 | 19.91  | 130.04935 | Pyroglutamic acid                                                                                  | [M+H] <sup>+</sup> | 130.04987 | C5H7NO3      | Alpha amino acids and derivatives          | ODHCTXKNWHXJC-UHFFFAOYNA-N   | O=C(O)C1N=C(O)CC1                                              |
| 2870 | 19.92  | 87.04472  | Isobutyric acid                                                                                    | [M-H] <sup>-</sup> | 87.04515  | C4H8O2       | Carboxylic acids                           | KQNPFPQTMSNSAP-UHFFFAOYSA-N  | O=C(O)C(C)C                                                    |
| 2871 | 19.925 | 357.12521 | Pioglitazone                                                                                       | [M+H] <sup>+</sup> | 357.12674 | C19H20N2O3S  | Phenol ethers                              | HYAFETHFCAUJAY-UHFFFAOYNA-N  | CCC=1C=CC(COC2=CC=C(C=C2)CC3C(=NC(=O)S3)O)=NC1                 |
| 2872 | 19.927 | 224.04832 | 1-Hydroxyanthraquinone                                                                             | [M-H] <sup>-</sup> | 224.0479  | C14H8O3      | Anthraquinones                             | BTLXPCBPYBNQR-UHFFFAOYSA-N   | C1=CC=C2C(=C1)C(C=3C=CC=C(C3C2=O)O)=O                          |
| 2873 | 19.928 | 199.02962 | Herniarin                                                                                          | [M+H] <sup>+</sup> | 199.03    | C10H8O3      | Coumarins and derivatives                  | L1IALPBMIOVAHH-UHFFFAOYSA-N  | O=C1OC=2C=C(OC)C=CC2C=C1                                       |
| 2874 | 19.929 | 237.02075 | 6,7,8-trimethoxycoumarin                                                                           | [M+H] <sup>+</sup> | 237.02609 | C12H12O5     | Coumarins and derivatives                  | RAVQKHLZHPYEJ-UHFFFAOYSA-N   | O=C1OC=2C(OC)=C(OC)C(OC)=CC2C=C1                               |
| 2875 | 19.932 | 134.05969 | INDOXYL SULFATE                                                                                    | [M+H] <sup>+</sup> | 134.06    | C8H7NO4S     | Arylsulfates                               | BXFFHSIDQOFMLE-UHFFFAOYSA-N  | O=S(=O)(O)OC1=CNC=2C=CC=CC12                                   |
| 2876 | 19.933 | 316.25439 | Decanoyl-L-carnitine                                                                               | [M+H] <sup>+</sup> | 316.24823 | C17H33NO4    | Acyl carnitines                            | LZOSYCMHQXPBU-UHFFFAOYSA-N   | O=C(1(O)CC(OC(=O)CCCCCCCC)[N+](C)(C)C                          |
| 2877 | 19.936 | 221.99419 | HISTAMINE DIHYDROCHLORIDE                                                                          | [M+H] <sup>+</sup> | 221.99615 | C5H11ClN3    | 2-arylethylamines                          | PPZMYIBUHIPZOS-UHFFFAOYSA-N  | C1.C1.N1=CNC(=C1)CCN                                           |
| 2878 | 19.939 | 207.1373  | Ibuprofen                                                                                          | [M+H] <sup>+</sup> | 207.13699 | C13H18O2     | Phenylpropanoic acids                      | HEPNNSXXWATRW-UHFFFAOYSA-N   | O=C(O)C(C1=CC=C(C=C1)CC(C)C)C                                  |
| 2879 | 19.944 | 116.07018 | Proline                                                                                            | [M+H] <sup>+</sup> | 116.07    | C5H9NO2      | Proline and derivatives                    | ONIBWKTPOPIA-BYPYZUCNSA-N    | O=C(O)C1NCCC1                                                  |

|      |        |           |                                                                  |                    |           |            |                                            |                              |                                                   |
|------|--------|-----------|------------------------------------------------------------------|--------------------|-----------|------------|--------------------------------------------|------------------------------|---------------------------------------------------|
| 2880 | 19.946 | 178.04254 | Isoxanthopterin                                                  | [M-H] <sup>-</sup> | 178.03705 | C6H5N5O2   | Pterins and derivatives                    | GLKCOBII ZKYKFN-UHFFFAOYSA-N | N=C1N=C(O)C=2N=CC(O)=NC2N1                        |
| 2881 | 19.951 | 169.12199 | Geranic acid                                                     | [M+H] <sup>+</sup> | 169.1223  | C10H16O2   | Acyclic monoterpenoids                     | ZHYZqXUYZJNEHD-UHFFFAOYSA-N  | O=C(O)C=C(C)CC=C(C)C                              |
| 2882 | 19.952 | 207.06438 | 7,8-dimethoxy-2H-chromen-2-one                                   | [M+H] <sup>+</sup> | 207.064   | C11H10O4   | Coumarins and derivatives                  | CHBBSMUTOCUYDW-UHFFFAOYSA-N  | O=C1OC=2C(OC)=C(OC)C=C2C=C1                       |
| 2883 | 19.965 | 254.10156 | 10-Azabenz[a]pyrene                                              | [M+H] <sup>+</sup> | 254.09642 | C19H11N    | Pyrenes                                    | BYF1UFNRSNKODH-UHFFFAOYSA-N  | C1=CC=2C=CC3=CC=4C=CC=NC4C=5C(=C1)C2C35           |
| 2884 | 19.969 | 148.06073 | L-Glutamic acid                                                  | [M+H] <sup>+</sup> | 148.06044 | C5H9NO4    | Glutamic acid and derivatives              | WHUUTDBJXJRKMK-VKHYHEASA-N   | C(CC(=O)O)[C@H](C(=O)O)N                          |
| 2885 | 19.97  | 200.1277  | Methylecgonine                                                   | [M+H] <sup>+</sup> | 200.12801 | C10H17NO3  | Tropane alkaloids                          | Q1QNNBXHAYSQRY-UHFFFAOYSA-N  | O=C(OC)C1C(O)CC2N(C)C1CC2                         |
| 2886 | 19.971 | 253.05798 | rubiadin                                                         | [M-H] <sup>-</sup> | 253.0596  | C15H10O4   | Hydroxyanthraquinones                      | IRZTUXPRITUZXP-UHFFFAOYSA-N  | O=C1C=2C=CC=CC2C(=O)C3=C(O)C(=C(O)C(=C13)C        |
| 2887 | 19.972 | 149.04596 | Arabinose                                                        | [M-H] <sup>-</sup> | 149.04555 | C5H10O5    | Pentoses                                   | PYMYPHUHKUWMLA-UHFFFAOYNA-N  | O=CC(O)C(O)C(O)CO                                 |
| 2888 | 19.972 | 193.03604 | D-sorbose                                                        | [M-H] <sup>-</sup> | 193.03539 | C6H10O7    | Sugar acids and derivatives                | VBUYCZFBWCYFD-FLRLBIABSA-N   | O=C(O)C(=O)C(O)C(O)CO                             |
| 2889 | 19.972 | 135.0304  | Threonine                                                        | [M-H] <sup>-</sup> | 135.02989 | C4H8O5     | Sugar acids and derivatives                | JP1JQSOTBSSVTP-UHFFFAOYNA-N  | O=C(O)C(O)C(O)CO                                  |
| 2890 | 19.975 | 185.02164 | m-Xylene-4-sulfonic acid                                         | [M-H] <sup>-</sup> | 185.02779 | C8H10O3S   | p-Methylbenzenesulfonates                  | CHZLVSBMXZSPNN-UHFFFAOYSA-N  | CC(=O)C(=O)C(=O)S(O)(=O)=O                        |
| 2891 | 19.985 | 177.04108 | Gluconic acid-γ-lactone                                          | [M-H] <sup>-</sup> | 177.04047 | C6H10O6    | Glucolactones                              | PHQVHQSTUBQK-UHFFFAOYNA-N    | O=C1OC(CO)C(O)C(O)C1O                             |
| 2892 | 19.989 | 145.04993 | 3-METHYLGUTARIC ACID                                             | [M-H] <sup>-</sup> | 145.05    | C6H10O4    | Methyl-branched fatty acids                | XJMMNTG1MDZPMU-UHFFFAOYSA-N  | O=C(O)CC(C)CC(=O)O                                |
| 2893 | 19.989 | 117.01871 | SUCCINATE                                                        | [M-H] <sup>-</sup> | 117.019   | C4H6O4     | Dicarboxylic acids and derivatives         | KDYFGRWQYBRFD-UHFFFAOYSA-N   | O=C(O)CCC(=O)O                                    |
| 2894 | 19.991 | 197.06747 | Harmol                                                           | [M-H] <sup>-</sup> | 197.07204 | C12H10N2O  | Alkaloids                                  | SATMZMMKDDTOSQ-UHFFFAOYSA-N  | CC1=C2NC3=C(C=CC(O)=C3)C2=CC=NC1                  |
| 2895 | 19.993 | 130.05026 | Pyroglutamic acid (not validated, isomer of 89)                  | [M+H] <sup>+</sup> | 130.0504  | C5H7NO3    | Amino acids                                | ODHCTXNWHXJC-UHFFFAOYNA-N    | O=C(O)C1NC(=O)CC1                                 |
| 2896 | 19.998 | 146.02515 | 1H-Isoidole-1,3(2H)-dione                                        | [M-H] <sup>-</sup> | 146.02475 | C8H5NO2    | Phthalimides                               | XKJCHHZQLQNZHY-UHFFFAOYSA-N  | C1=CC=C2C(=C1)C(=NC2=O)O                          |
| 2897 | 19.998 | 217.03114 | 4,4'-Thiodiphenol                                                | [M-H] <sup>-</sup> | 217.03287 | C12H10O2S  | Diaryliethers                              | VWGKEVFBQIAND-UHFFFAOYSA-N   | C=C1C=C(C=CC1O)SC2=CC=C(C=C2)O                    |
| 2898 | 19.998 | 138.02016 | 4-Nitrophenol                                                    | [M-H] <sup>-</sup> | 138.01967 | C6H5NO3    | Nitrophenols                               | BTJ1UGIUPKRLHP-UHFFFAOYSA-N  | O=N(O)C1=CC=C(O)C=C1                              |
| 2899 | 19.999 | 129.01863 | Itaconic acid (Not validated)                                    | [M-H] <sup>-</sup> | 129.0188  | C5H6O4     | Organic acids                              | LVBHZNLOWSRM-UHFFFAOYSA-N    | O=C(O)C(=C)CC(=O)O                                |
| 2900 | 20     | 159.06561 | 3-Methyladipic acid                                              | [M-H] <sup>-</sup> | 159.06628 | C7H12O4    | Medium-chain fatty acids                   | SYEOWNSTUDRG-UHFFFAOYNA-N    | O=C(O)CCC(C)CC(=O)O                               |
| 2901 | 20.004 | 156.06519 | Indole-3-acetonitrile                                            | [M+H] <sup>+</sup> | 156.06821 | C10H8N2    | 3-alkylindoles                             | DMCFQDLJMLSNC-UHFFFAOYSA-N   | N#CCCC1=CC=C(C=C1)C#N                             |
| 2902 | 20.014 | 337.20325 | Bavachinin A                                                     | [M-H] <sup>-</sup> | 337.20111 | C21H22O4   | 6-prenylated flavanones                    | HOVCSQHKPZS1KB-FQEVSTJZSA-N  | O=C1C2=CC(=C(OC)C=C2OC(C3=CC=C(O)C=C3)C1)CC=C(C)C |
| 2903 | 20.017 | 261.0162  | isofraxidin                                                      | [M+H] <sup>+</sup> | 261.01599 | C11H10O5   | 7-hydroxycoumarins                         | HOEVRIHMDJKUMZ-UHFFFAOYSA-N  | O=C1OC=2C(OC)=C(O)C(OC)=CC2C=C1                   |
| 2904 | 20.019 | 296.1842  | Esmolol                                                          | [M+H] <sup>+</sup> | 296.18564 | C16H25NO4  | Phenol ethers                              | AGNDDEOPVVGCPG-UHFFFAOYNA-N  | O=C(OC)CCC1=CC=C(OC(O)CNC(C)C)C=C1                |
| 2905 | 20.02  | 297.11691 | Enterolactone                                                    | [M-H] <sup>-</sup> | 297.11322 | C18H18O4   | Lignols                                    | HVDGDHABMCBLR-UHFFFAOYNA-N   | OC1=CC(C2CCOC(=O)C2CC2=CC(O)=CC=C2)=CC=C1         |
| 2906 | 20.024 | 249.99564 | 2-[(4,6-diamino-1,3,5-triazin-2-yl)thio]-Ethanesulfonic acid     | [M-H] <sup>-</sup> | 250.00101 | C5H9N5O3S2 | 1,3,5-triazine-2,4-diamines                | VQJSEYJDXBICY-UHFFFAOYSA-N   | O=S(=O)(O)CCSC1=NC(=N)NC(=N)N1                    |
| 2907 | 20.024 | 164.06999 | Clozapine (Clozaril)                                             | [M+H] <sup>+</sup> | 164.073   | C18H19ClN4 | Dibenzodiazepines                          | QZUDENBUXUHMW-UHFFFAOYSA-N   | C1C1=CC=C2NC=3C=CC=C3C(=NC2=C1)N4CCN(C)CC4        |
| 2908 | 20.03  | 306.97766 | (2E)-2-[hydroxy(phenyl)methylidene]-6-methoxy-1-benzofuran-3-one | [M+H] <sup>+</sup> | 306.97165 | C16H12O4   | Aurone flavonoids                          | TXVHAPNXGBCXJ-JQ1JEIRASA-N   | O=C1C(OC2=CC(OC)=CC=C21)=C(O)C=3C=CC=C3           |
| 2909 | 20.031 | 228.98563 | Hymecromone Methyl Ether                                         | [M+H] <sup>+</sup> | 228.98586 | C11H10O3   | Coumarins and derivatives                  | UDFPKNSWSYB1HO-UHFFFAOYSA-N  | O=C1OC=2C=C(OC)C=CC2C(=C1)C                       |
| 2910 | 20.037 | 169.08588 | FA 9:2+10                                                        | [M-H] <sup>-</sup> | 169.08591 | C9H14O3    | Oxidized fatty acids                       | QHVBPAALYZNWPK-UHFFFAOYSA-N  | O=C(O)C=CC(=O)CCCC                                |
| 2911 | 20.041 | 193.03444 | D-GLUCURONIC ACID                                                | [M-H] <sup>-</sup> | 193.035   | C6H10O7    | Glucuronic acid derivatives                | AEMOLEFTQBMLQ-UHFFFAOYSA-N   | O=C(O)C1OC(C(O)C(O)C1O                            |
| 2912 | 20.042 | 179.05533 | Psicose                                                          | [M-H] <sup>-</sup> | 179.05611 | C6H12O6    | Monosaccharides                            | BJH1KHVHCXPLS-UHFFFAOYNA-N   | O=C(CO)C(O)C(O)CO                                 |
| 2913 | 20.043 | 133.04961 | Dihydroxy-Valerate                                               | [M-H] <sup>-</sup> | 133.0497  | C5H10O4    | Fatty acids                                | JTEYKUFKXGDTU-UHFFFAOYNA-N   | O=C(O)C(O)C(O)C(C)C                               |
| 2914 | 20.044 | 122.09614 | 2,4,6-Trimethylpyridine                                          | [M+H] <sup>+</sup> | 122.09643 | C8H11N     | Methylpyridines                            | BWZVCCNYMEVEX-UHFFFAOYSA-N   | CC1=CC(C)=NC(C)=C1                                |
| 2915 | 20.044 | 96.04408  | 3-Hydroxypyridine                                                | [M+H] <sup>+</sup> | 96.04439  | C5H5NO     | Hydroxypyridines                           | GRFNBEZ1AWKCO-UHFFFAOYSA-N   | c1cc(cnc1)O                                       |
| 2916 | 20.045 | 177.0397  | D-GLUCONATE                                                      | [M-H] <sup>-</sup> | 177.03999 | C6H12O7    | Medium-chain hydroxy acids and derivatives | RGLNJXEOKUBD-UHFFFAOYSA-N    | O=C(O)C(O)C(O)C(O)CO                              |
| 2917 | 20.047 | 211.00325 | Pesticide5_Acibenzolar-S-methyl_C8H6N2OS2_Actigard               | [M+H] <sup>+</sup> | 210.99899 | C8H6N2OS2  | Benzothiadiazoles                          | UEL1TFHSLAHKR-UHFFFAOYSA-N   | O=C(SC)C1=CC=CC(=C1)N=C1C                         |
| 2918 | 20.051 | 163.039   | 2-Coumaric acid                                                  | [M-H] <sup>-</sup> | 163.04007 | C9H8O3     | Hydroxycinnamic acids                      | PMOWT1HVNWYF1-AATRIKPKSA-N   | OC(=O)C=Cc1cc(C)=CC=C1O                           |
| 2919 | 20.052 | 125.02366 | Benzene-1,2,4-triol                                              | [M-H] <sup>-</sup> | 125.02441 | C6H6O3     | Hydroxyquinols and derivatives             | GGQRNBQZJCCN-UHFFFAOYSA-N    | OC1=CC=C(C(=O)O)C=C1                              |
| 2920 | 20.055 | 167.03416 | Homogenetic acid                                                 | [M-H] <sup>-</sup> | 167.03499 | C8H8O4     | 2(hydroxyphenyl)acetic acids               | IGMNYECUMZDDF-UHFFFAOYSA-N   | OC(=O)CC1=CC(O)=CC=C1O                            |
| 2921 | 20.056 | 161.04457 | Hydroxymethylglutaric acid                                       | [M-H] <sup>-</sup> | 161.0451  | C6H10O5    | Organic acids                              | NPOAOTPXNNWTSU-UHFFFAOYSA-N  | O=C(O)CC(O)(C)CC(=O)O                             |
| 2922 | 20.061 | 101.07047 | Gyromitrin                                                       | [M+H] <sup>+</sup> | 101.07094 | C4H8N2O    | N-alkylated hydrazones                     | IMAGWKUTFZRWBS-HWKANZROSA-N  | O=CN(N=CC)C                                       |

|      |        |           |                                                                                |                    |           |             |                                           |                              |                                                                  |
|------|--------|-----------|--------------------------------------------------------------------------------|--------------------|-----------|-------------|-------------------------------------------|------------------------------|------------------------------------------------------------------|
| 2923 | 20.062 | 224.09085 | Pesticide3_Dioxacarb_C11H13N04_Phenol, 2-(1,3-dioxolan-2-yl)-, methylcarbamate | [M+H] <sup>+</sup> | 224.091   | C11H13N04   | Phenoxy compounds                         | SDKQRNRDYGKY-UHFFFAOYSA-N    | OC(=NC)OC=1C=CC=CC1C20CCO2                                       |
| 2924 | 20.063 | 195.05006 | Xanthone                                                                       | [M-H] <sup>-</sup> | 195.0452  | C13H8O2     | Xanthenes                                 | JNELGWHKGNBSMD-UHFFFAOYSA-N  | O=C1C=2C=CC=CC2OC=3C=CC=CC31                                     |
| 2925 | 20.069 | 146.05243 | 3-Formylindole                                                                 | [M+H] <sup>+</sup> | 146.06004 | C9H7NO      | Indoles                                   | OLNJUISUQQNIM-UHFFFAOYSA-N   | O=CC1=CN2C=CC=CC=C12                                             |
| 2926 | 20.07  | 206.08853 | 1-phenylisoquinoline                                                           | [M+H] <sup>+</sup> | 206.09    | C15H11N     | Phenylpyridines                           | LPWDYWZ1WDTCV-UHFFFAOYSA-N   | N=1C=CC=2C=CC=CC21C=3C=CC=CC3                                    |
| 2927 | 20.07  | 108.08051 | 2,6-Dimethylpyridine                                                           | [M+H] <sup>+</sup> | 108.08077 | C7H9N       | Methylpyridines                           | O1SVCGZHLKMSJ-UHFFFAOYSA-N   | CC=1C=CC=C(C)N1                                                  |
| 2928 | 20.071 | 183.101   | Angelical anhydride                                                            | [M+H] <sup>+</sup> | 183.10001 | C10H14O3    | Dicarboxylic acids and derivatives        | L1HLSLRANKCHLY-SFECWDFSA-N   | O=C(OC(=O)C(=CC)C)C(=CC)C                                        |
| 2929 | 20.071 | 118.08569 | Valine                                                                         | [M+H] <sup>+</sup> | 118.086   | C5H11NO2    | Valine and derivatives                    | KZSNJWFQEVHDMF-UHFFFAOYSA-N  | O=C(O)C(N)C(C)C                                                  |
| 2930 | 20.076 | 269.08661 | 7,3',4'-Trihydroxyflavone                                                      | [M-H] <sup>-</sup> | 269.08456 | C15H10O5    | Flavones                                  | PVFGJHYLIHMCQD-UHFFFAOYSA-N  | O=C1C=C(OC2=CC(O)=CC=C12)C=3C=CC(O)=C(O)C3                       |
| 2931 | 20.078 | 103.03949 | 3-HYDROXYBUTANOIC ACID                                                         | [M-H] <sup>-</sup> | 103.04    | C4H8O3      | Beta hydroxy acids and derivatives        | WHBMMWSBFZVSSR-GSVUUGTDSA-N  | O=C(O)CC(O)C                                                     |
| 2932 | 20.079 | 196.09613 | Glucosaminic Acid                                                              | [M+H] <sup>+</sup> | 196.09639 | C6H13NO6    | D-alpha-amino acids                       | UFYKDFXCZBTL00-TXICZTDVSA-N  | O=C(O)C(N)C(O)C(O)C(O)CO                                         |
| 2933 | 20.083 | 72.08051  | Pyrrolidine                                                                    | [M+H] <sup>+</sup> | 72.08078  | C4H9N       | Pyrrolidines                              | RWRDLPDLKQPQOW-UHFFFAOYSA-N  | C1CCNC1                                                          |
| 2934 | 20.093 | 131.11752 | N-Acetylputrescine                                                             | [M+H] <sup>+</sup> | 131.11789 | C6H14N2O    | Carboximide acids                         | KLZGKIDSEJWEDW-UHFFFAOYSA-N  | CC(O)=NCCCN                                                      |
| 2935 | 20.094 | 147.06473 | Phenyltetrazole                                                                | [M+H] <sup>+</sup> | 147.06653 | C7H6N4      | Phenyltetrazoles and derivatives          | MARUHZGHZWCQU-UHFFFAOYSA-N   | C1=CC=C(C=C1)C2=NNN=N2                                           |
| 2936 | 20.1   | 267.07315 | INOSINE                                                                        | [M-H] <sup>-</sup> | 267.073   | C10H12N4O5  | Purine nucleosides                        | UQQMVRMYASKQ-UHFFFAOYSA-N    | O=C1N=CN2C=C1N=CN2C3OC(CO)C(O)C3O                                |
| 2937 | 20.118 | 180.10094 | Phenacetin                                                                     | [M+H] <sup>+</sup> | 180.10201 | C10H13NO2   | Acetanilides                              | CFJSUEIXXCENMM-UHFFFAOYSA-N  | O=C(NC1=CC=C(C(OC)C=C1)C                                         |
| 2938 | 20.12  | 278.8667  | 3,5-dibromo-2-methoxyphenol                                                    | [M-H] <sup>-</sup> | 278.866   | C7H6Br2O2   | Methoxyphenols                            | YFCZJZFKAEGT-UHFFFAOYSA-N    | BrC=1C=C(Br)C(OC)=C(O)C1                                         |
| 2939 | 20.122 | 156.06592 | 3-Methylcrotonylglycine                                                        | [M-H] <sup>-</sup> | 156.06662 | C7H11NO3    | N-acyl-alpha amino acids                  | PFWQSHXPNKRLIV-UHFFFAOYSA-N  | O=C(O)CN=C(O)C=C(C)C                                             |
| 2940 | 20.123 | 74.05972  | N,N-Dimethylformamide                                                          | [M+H] <sup>+</sup> | 74.06004  | C3H7NO      | Tertiary carboxylic acid amides           | ZMXDDKWL CZAD1W-UHFFFAOYSA-N | O=CN(C)C                                                         |
| 2941 | 20.124 | 90.0547   | Alanine                                                                        | [M+H] <sup>+</sup> | 90.05495  | C3H7NO2     | Alanine and derivatives                   | QNAYEMKLOCPYVGJ-UHFFFAOYNA-N | O=C(O)C(N)C                                                      |
| 2942 | 20.127 | 167.03412 | Vanillic acid                                                                  | [M-H] <sup>-</sup> | 167.03499 | C8H8O4      | M-methoxybenzoic acids and derivatives    | WKOLLVMJNQ1ZCI-UHFFFAOYSA-N  | COC1=CC(=CC=C1O)C(O)=O                                           |
| 2943 | 20.129 | 187.05923 | Rhamnose                                                                       | [M+H] <sup>+</sup> | 187.05769 | C6H12O5     | Hexoses                                   | PNNNSAQSRJYSB-BXKXVDMCESA-N  | C[C@H](O)[C@H](O)[C@H](O)[C@H](O)C=O                             |
| 2944 | 20.133 | 246.12245 | 4-Acetamidoantipyrine                                                          | [M+H] <sup>+</sup> | 246.1237  | C13H15N3O2  | Phenylpyrazoles                           | O1AGWXKSCXPNNZ-UHFFFAOYSA-N  | CN1N(C(=O)C(N=C(C)O)=C1)C1=CC=CC=C1                              |
| 2945 | 20.137 | 297.15091 | ostruthin                                                                      | [M-H] <sup>-</sup> | 297.1496  | C19H22O3    | Terpene lactones                          | INBMTJJPUABOQJ-VGOFMYFVSA-N  | O=C1OC=2C=C(O)C(=CC2=C1)CC=C(C)CCC=C(C)C                         |
| 2946 | 20.14  | 122.05975 | Benzamide                                                                      | [M+H] <sup>+</sup> | 122.06004 | C7H7NO      | Benzamides                                | KDAEFPNCMNJSK-UHFFFAOYSA-N   | C1=CC=C(C=C1)C(=N)O                                              |
| 2947 | 20.141 | 170.08087 | Pyridoxine                                                                     | [M+H] <sup>+</sup> | 170.08099 | C8H11NO3    | Pyridoxines                               | LXNHXLTXMVPWM-UHFFFAOYSA-N   | OC=1C(=NC=C(C1CO)CO)C                                            |
| 2948 | 20.152 | 169.08575 | 2-(3-oxobutyl)cyclopentane-1,3-dione                                           | [M+H] <sup>+</sup> | 169.09    | C9H12O3     | Beta-diketones                            | XRLGHWYZNGYZOW-UHFFFAOYSA-N  | O=C(C)CCC1C(=O)CCC1=O                                            |
| 2949 | 20.152 | 397.07581 | Propoxycarbazon                                                                | [M-H] <sup>-</sup> | 397.08234 | C15H18N4O7S | Benzoic acid esters                       | JTHMVBQQLD1Y-UHFFFAOYSA-N    | CCCC1=NN(C(C(=NS(C2=CC=CC=C2O)OC(=O)=O)O)C(N1C)=O                |
| 2950 | 20.158 | 205.08662 | 1-[4-hydroxy-3-(3-methylbut-2-enyl)phenyl]ethanone                             | [M+H] <sup>+</sup> | 205.08617 | C13H16O2    | Alkyl-phenylketones                       | QJAPFSSVKIZTMR-UHFFFAOYSA-N  | O=C(C1=CC=C(O)C(=C1)CC=C(C)C)C                                   |
| 2951 | 20.167 | 182.08046 | 2-(4-aminotetrahydro-2H-pyran-4-yl)acetic acid                                 | [M+H] <sup>+</sup> | 182.08    | C7H13NO3    | Pyranoid amino acids and derivatives      | QRIAWCUEIMQLGG-UHFFFAOYSA-N  | O=C(O)CC1(N)CCOCC1                                               |
| 2952 | 20.169 | 241.07086 | lusianthridin                                                                  | [M-H] <sup>-</sup> | 241.0719  | C15H14O3    | Hydrophenanthrenes                        | RDKD1PDDUFMMMT-UHFFFAOYSA-N  | OC=1C=CC2=C(C1)CCC3=CC(OC)=CC(O)=C23                             |
| 2953 | 20.173 | 132.10143 | Leucine                                                                        | [M+H] <sup>+</sup> | 132.1019  | C6H13NO2    | Leucine and derivatives                   | ROHPNLRQFUHQCH-UHFFFAOYNA-N  | O=C(O)C(N)CC(C)C                                                 |
| 2954 | 20.177 | 169.04903 | 2,6-Dimethoxyquinone                                                           | [M+H] <sup>+</sup> | 169.04953 | C8H8O4      | P-benzoquinones                           | OLBNOBQQZRLMP-UHFFFAOYSA-N   | O=C1C=C(OC)C(=O)C(OC)=C1                                         |
| 2955 | 20.179 | 76.039    | Acetohydroxamic acid                                                           | [M+H] <sup>+</sup> | 76.03931  | C2H5NO2     | Acetohydroxamic acids                     | RRUDCFGSUDOHG-UHFFFAOYSA-N   | ON=C(O)C                                                         |
| 2956 | 20.181 | 166.04961 | Phthalamic acid                                                                | [M+H] <sup>+</sup> | 166.04987 | C8H7NO3     | Benzoic acids                             | CYMRPDYINXWJFU-UHFFFAOYSA-N  | C1=CC=C(C(=C1)C(=N)O)C(=O)O                                      |
| 2957 | 20.189 | 182.11749 | Homoveratrylamine                                                              | [M+H] <sup>+</sup> | 182.11755 | C10H15NO2   | Dimethoxybenzenes                         | ANOUKFYBOAKOIR-UHFFFAOYSA-N  | O(C1=CC=C(C(=C1O)CCN)C                                           |
| 2958 | 20.19  | 103.04034 | 2-Hydroxyisobutyric acid                                                       | [M-H] <sup>-</sup> | 103.04007 | C4H8O3      | Alpha hydroxy acids and derivatives       | BWLBGMLXKSTLSX-UHFFFAOYSA-N  | O=C(O)C(O)C(C)C                                                  |
| 2959 | 20.191 | 202.09972 | (1S,2S)-2-(methylamino)-1-phenylpropan-1-ol hydrochloride                      | [M+H] <sup>+</sup> | 202.10001 | C10H16ClNO  | Phenylpropanes                            | BALXUFOVQVENTIU-KXNXZCPBSA-N | C1.CC(C=C1C=CC(C1)C(N)C                                          |
| 2960 | 20.194 | 511.46915 | Gallamine                                                                      | [M+H] <sup>+</sup> | 511.46909 | C30H60N3O3  | Phenol ethers                             | OZLPUNFCJDMJD-UHFFFAOYSA-N   | CC[N+](CC)(CC)CCOC1=CC=CC(OC([N+](O)C)(CC)C)=C1OCC([N+](CC)(CC)C |
| 2961 | 20.194 | 89.0237   | GLYCERALDEHYDE                                                                 | [M-H] <sup>-</sup> | 89.0239   | C3H6O3      | Monosaccharides                           | MNQXJOMYWMBOU-UHFFFAOYSA-N   | O=CC(O)CO                                                        |
| 2962 | 20.201 | 253.1801  | ilicic acid                                                                    | [M+H] <sup>+</sup> | 253.17999 | C15H24O3    | Eudesmane, isoeudesmane or cycloeudesmane | FXKCGBBUBCRPUS-QHSBEEBCSA-N  | O=C(O)C(=C)C1CCC2(C)CCCC(O)C(C)C2C1                              |
| 2963 | 20.204 | 99.04379  | alpha-Methylene-gamma-butyrolactone                                            | [M+H] <sup>+</sup> | 99.04405  | C5H6O2      | Gamma butyrolactones                      | GSLDEZOOSBFGP-UHFFFAOYSA-N   | O=C1OCCC1=C                                                      |
| 2964 | 20.204 | 207.06506 | Citroten                                                                       | [M+H] <sup>+</sup> | 207.065   | C11H10O4    | Coumarins and derivatives                 | NXJCRELRQHZBQA-UHFFFAOYSA-N  | O=C1OC2=CC(OC)=CC(OC)=C2C=C1                                     |
| 2965 | 20.21  | 217.07001 | Caffeine                                                                       | [M+H] <sup>+</sup> | 217.07001 | C8H10N4O2   | Xanthines                                 | RYVYLZVUV1JVGH-UHFFFAOYSA-N  | O=C1C2=C(N=CN2C)N(C(=O)N1C)C                                     |

[illegible]

|      |        |           |                                                                                                             |                    |           |             |                                  |                              |                                                          |
|------|--------|-----------|-------------------------------------------------------------------------------------------------------------|--------------------|-----------|-------------|----------------------------------|------------------------------|----------------------------------------------------------|
| 3009 | 20.79  | 164.99457 | maltol                                                                                                      | [M+H] <sup>+</sup> | 164.99486 | C6H6O3      | Pyranones and derivatives        | XPCTZQVDEJYUGT-UHFFFAOYSA-N  | O=C1C=COC(=C1O)C                                         |
| 3010 | 20.816 | 194.98166 | Orotic Acid                                                                                                 | [M+H] <sup>+</sup> | 194.98027 | C5H4N2O4    | Pyrimidinecarboxylic acids       | PXQPEWDEAKTCGB-UHFFFAOYSA-N  | O=C(O)C=1N=C(O)N=C(O)C1                                  |
| 3011 | 20.832 | 379.08411 | Justicidin G                                                                                                | [M+H] <sup>+</sup> | 379.08124 | C21H14O7    | Lignols                          | VINGQMKGDIELG-UHFFFAOYSA-N   | COC1=C2OCOC2=CC2=C(C3=C(C=C12)C(=O)OC3)C1=CC2=C(OC2)C=C1 |
| 3012 | 20.835 | 269.2471  | methyl palmitoleate                                                                                         | [M+H] <sup>+</sup> | 269.2475  | C17H32O2    | Fatty acid methyl esters         | IZFGRAGOVZCUFB-HJWRWDRZSA-N  | O=C(OC)CCCCCCCC=CCCCCCC                                  |
| 3013 | 20.838 | 148.03912 | Isatin                                                                                                      | [M+H] <sup>+</sup> | 148.03931 | C8H5NO2     | Indolines                        | JXDYKVIHCLTXOP-UHFFFAOYSA-N  | O=C1NC2=CC=CC=C2C1=O                                     |
| 3014 | 20.877 | 162.11195 | L-Carnitine                                                                                                 | [M+H] <sup>+</sup> | 162.11247 | C7H15NO3    | Carnitines                       | PHIQHXFUZVPYII-ZCFTWIBFSA-N  | C[N+](C)(C)C[C=H](CC(=O)[O-])O                           |
| 3015 | 20.885 | 123.05493 | Nicotinamide                                                                                                | [M+H] <sup>+</sup> | 123.05529 | C6H6N2O     | Nicotinamides                    | DFPAKSUCGFDDF-UHFFFAOYSA-N   | N=C(O)C=1C=NC=CC1                                        |
| 3016 | 20.89  | 261.18573 | falcarindiol                                                                                                | [M+H] <sup>+</sup> | 261.18491 | C17H24O2    | Long-chain fatty alcohols        | QW'CNQXNAFCBLLV-RCQSYPMMSA-N | OC(C#CC#CC(O)C=CCCCCCC)C=C                               |
| 3017 | 20.894 | 236.01015 | Pesticidel_Omethoate_C5H12N04PS_                                                                            | [M+H] <sup>+</sup> | 236.011   | C5H12N04PS  | Secondary carboxylic acid amides | PZXOQEXFMJCDPG-UHFFFAOYSA-N  | O=C(NC)CSP(=O)(OC)OC                                     |
| 3018 | 20.914 | 130.0658  | Indole-3-carbinol                                                                                           | [M+H] <sup>+</sup> | 130.06512 | C9H9NO      | 3-alkylindoles                   | IVYPNXXAYMYVSP-UHFFFAOYSA-N  | OCC1=CNC2=CC=CC=C12                                      |
| 3019 | 20.951 | 251.99133 | Pesticidel_Dimethoate_C5H12N03PS2_Phosphorodithioic acid, O,O-dimethyl S-[2-(methylamino)-2-oxoethyl] ester | [M+H] <sup>+</sup> | 251.989   | C5H12N03PS2 | Dithiophosphate O-esters         | MCW'XGJITAZMZEV-UHFFFAOYSA-N | S=P(OC)(OC)SCC(O)=NC                                     |

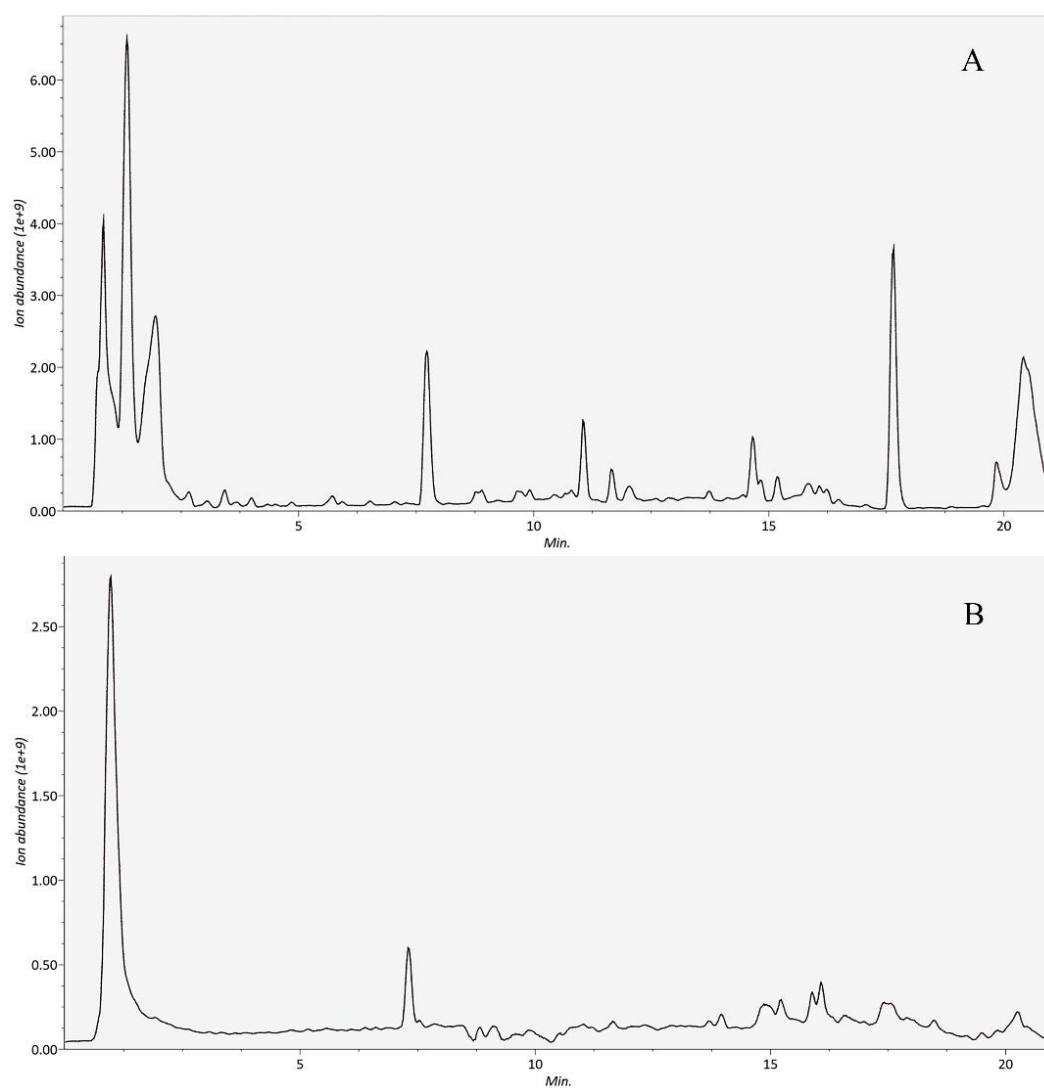

**Figure S1.** Total ion flow diagram in positive ion mode (**A**) and negative ion mode (**B**) of LC-MS/MS.
